# Supplementary material for: Building an International One Health Strain Level Database to Characterise the Epidemiology of AMR Threats: ESBL—AmpC Producing E. coli as An Example—Challenges and Perspectives
Source: Antibiotics (Basel). 2023 Mar 10;12(3):552. doi: 10.3390/antibiotics12030552 (PMC10044432; doi:10.3390/antibiotics12030552)
Supplement: Supplementary file 1 [file antibiotics-12-00552-s001.zip › Supplementary Data S1.xlsx]

## Sheet: Supplementary Table
id	year	partner	partner_country	isolate_country	source_group	source_subgroup	sample	comment	sequenced	repository	accession	method	method_comment	amp	cefotax1	ceftazid1	mero	l	cipro	tetra	col	gent	trim	sulf	chlor	azyt	tigec	cefoxit	cefep	cefot_clav	ceftaz_clav	mero_2	temo	imip	ertap	cefotax2	ceftazid2	blaCTX_M_genes	blaTEM_genes	blaSHV_genes	pAmpC_genes	comments
213	2020	Teagasc	Ireland	Ireland	Livestock	Pigs	Faeces/manure	no AMU during weaning	1	NA	NA	Disk diffusion	NA	NA	R	NA	S	S	S	R	NA	NA	S	NA	S	NA	NA	NA	NA	NA	NA	NA	no data	NA	NA	NA	NA	NA	NA	NA	NA	ESBL gene results based on contig alignments against the ResFinder database (min. identity 80 %; min. covergae 75%)
635	2020	Teagasc	Ireland	Ireland	Livestock	Pigs	Environment_(farm/slaughterhouse)	AB & ZnO	1	NA	NA	Disk diffusion	NA	NA	R	NA	S	R	R	S	NA	NA	I	NA	S	NA	NA	NA	NA	NA	NA	NA	NA	NA	NA	NA	NA	NA	NA	NA	NA	ESBL gene results based on contig alignments against the ResFinder database (min. identity 80 %; min. covergae 75%)
643	2020	Teagasc	Ireland	Ireland	Livestock	Pigs	Environment_(farm/slaughterhouse)	AB & ZnO	1	NA	NA	Disk diffusion	NA	NA	R	NA	S	R	R	R	NA	NA	S	NA	S	NA	NA	NA	NA	NA	NA	NA	NA	NA	NA	NA	NA	NA	blaTEM-1B	NA	NA	ESBL gene results based on contig alignments against the ResFinder database (min. identity 80 %; min. covergae 75%)
2392	2013	INIAV	Portugal	Portugal	Livestock	Cattle	Other	Corpse/Post-mortem	0	NA	NA	Others (specify in next column)	Agar dilution	>64	4	NA	NA	>512	>8	>64	NA	1	1	>1024	64	NA	NA	NA	NA	NA	NA	NA	NA	NA	NA	NA	NA	NA	blaTEM-1	blaSHV-12	NA	NA
4217	2013	INIAV	Portugal	Portugal	Pets	Ormental_birds_parrot_cary_dove_peacock_waterfowl	Faeces	NA	0	NA	NA	Others (specify in next column)	Agar dilution	>64	2	NA	NA	>512	>8	2	NA	0.5	0.5	>1024	8	NA	NA	NA	NA	NA	NA	NA	NA	NA	NA	NA	NA	NA	NA	NA	NA	NA
7929	2013	INIAV	Portugal	Portugal	Livestock	Cattle	Faeces/manure	NA	0	NA	NA	Others (specify in next column)	Agar dilution	>64	4	NA	NA	>512	>8	>64	NA	1	1	>1024	64	NA	NA	NA	NA	NA	NA	NA	NA	NA	NA	NA	NA	NA	blaTEM-1	blaSHV-12	NA	NA
25163	2013	INIAV	Portugal	Portugal	Zoo_animals	Birds	Faeces	NA	0	NA	NA	Others (specify in next column)	Agar dilution	>64	>8	NA	NA	>512	>8	>64	NA	0.5	<=0.25	16	8	NA	NA	NA	NA	NA	NA	NA	NA	NA	NA	NA	NA	blaCTX-M-14	NA	NA	NA	NA
26327	2016	INIAV	Portugal	Portugal	Livestock	Broiler_chickens	Meat	NA	0	NA	NA	Microdilution	NA	>64	4	8	<=0.03	>128	>8	64	<=1	<=0.5	<=0.25	>1024	32	4	<=0.25	2	0.25	<=0.06	0.25	<=0.03	2	0.25	<=0.015	2	8	NA	NA	blaSHV-12	NA	NA
26333	2016	INIAV	Portugal	Portugal	Livestock	Broiler_chickens	Meat	NA	0	NA	NA	Microdilution	NA	>64	4	>8	<=0.03	8	0.25	4	<=1	<=0.5	<=0.25	>1024	<=8	8	<=0.25	8	0.5	<=0.06	<=0.12	<=0.03	4	<=0.12	<=0.015	8	8	NA	NA	blaSHV-12	NA	NA
26335	2016	INIAV	Portugal	Portugal	Livestock	Broiler_chickens	Meat	NA	0	NA	NA	Microdilution	NA	>64	2	4	<=0.03	>128	>8	>64	<=1	4	>32	>1024	<=8	8	<=0.25	64	0.125	1	4	<=0.03	2	0.5	0.03	2	4	NA	NA	NA	NA	Mutation on the promoter of the chromossomic AmpC gene
26341	2016	INIAV	Portugal	Portugal	Livestock	Broiler_chickens	Meat	NA	0	NA	NA	Microdilution	NA	>64	2	8	<=0.03	>128	>8	>64	<=1	2	>32	>1024	<=8	8	0.5	64	0.125	1	4	<=0.03	8	0.25	0.03	2	8	NA	NA	NA	NA	Mutation on the promoter of the chromossomic AmpC gene
26576	2016	INIAV	Portugal	Portugal	Livestock	Broiler_chickens	Meat	NA	0	NA	NA	Microdilution	NA	>64	>4	8	<=0.03	>128	>8	32	<=1	<=0.5	>32	>1024	128	4	<=0.25	8	>32	<=0.06	<=0.12	<=0.03	8	0.25	0.03	>64	16	blaCTX-M-55	NA	NA	NA	NA
26577	2016	INIAV	Portugal	Portugal	Livestock	Broiler_chickens	Meat	NA	0	NA	NA	Microdilution	NA	>64	2	4	<=0.03	>128	>8	>64	<=1	2	>32	>1024	<=8	8	<=0.25	32	0.25	1	2	<=0.03	4	0.25	<=0.015	2	4	NA	NA	NA	NA	Mutation on the promoter of the chromossomic AmpC gene
27449	2016	INIAV	Portugal	Portugal	Livestock	Broiler_chickens	Meat	NA	0	NA	NA	Microdilution	NA	>64	>4	8	<=0.03	128	0.25	>64	<=1	<=0.5	>32	>1024	<=8	8	<=0.25	4	0.5	<=0.06	<=0.12	<=0.03	4	0.25	<=0.015	8	16	NA	blaTEM-1	blaSHV-12	NA	NA
27452	2016	INIAV	Portugal	Portugal	Livestock	Broiler_chickens	Meat	NA	0	NA	NA	Microdilution	NA	>64	2	4	<=0.03	>128	>8	>64	<=1	2	>32	>1024	<=8	8	<=0.25	64	0.125	1	4	<=0.03	8	0.25	<=0.015	2	4	NA	NA	NA	NA	Mutation on the promoter of the chromossomic AmpC gene
27512	2016	INIAV	Portugal	Portugal	Livestock	Broiler_chickens	Meat	NA	0	NA	NA	Microdilution	NA	>64	2	8	<=0.03	>128	8	<=2	<=1	1	>32	>1024	32	4	<=0.25	2	0.125	<=0.06	<=0.12	<=0.03	2	0.25	<=0.015	2	8	NA	blaTEM-1	blaSHV-12	NA	NA
27551	2016	INIAV	Portugal	Portugal	Livestock	Broiler_chickens	Meat	NA	0	NA	NA	Microdilution	NA	>64	>4	1	<=0.03	>128	0.25	>64	<=1	1	>32	>1024	<=8	4	0.5	4	4	<=0.06	<=0.12	<=0.03	4	0.25	<=0.015	8	1	blaCTX-M-1	NA	NA	NA	NA
28540	2016	INIAV	Portugal	Portugal	Livestock	Broiler_chickens	Meat	NA	0	NA	NA	Microdilution	NA	>64	>4	8	<=0.03	>128	>8	>64	<=1	2	>32	>1024	<=8	8	<=0.25	64	0.25	2	4	<=0.03	4	<=0.12	0.06	2	8	NA	NA	NA	NA	Mutation on the promoter of the chromossomic AmpC gene
28543	2016	INIAV	Portugal	Portugal	Livestock	Broiler_chickens	Meat	NA	0	NA	NA	Microdilution	NA	>64	2	4	<=0.03	>128	>8	>64	<=1	2	>32	>1024	<=8	8	<=0.25	>64	0.125	1	4	<=0.03	8	0.25	<=0.015	2	8	NA	NA	NA	NA	Mutation on the promoter of the chromossomic AmpC gene
28544	2016	INIAV	Portugal	Portugal	Livestock	Broiler_chickens	Meat	NA	0	NA	NA	Microdilution	NA	>64	>4	2	<=0.03	>128	0.25	>64	<=1	<=0.5	>32	>1024	<=8	8	0.5	2	32	<=0.06	0.25	<=0.03	8	0.25	<=0.015	>64	2	blaCTX-M-1	NA	NA	NA	NA
28545	2016	INIAV	Portugal	Portugal	Livestock	Broiler_chickens	Meat	NA	0	NA	NA	Microdilution	NA	>64	>4	1	<=0.03	<=4	0.03	>64	<=1	<=0.5	>32	>1024	<=8	4	<=0.25	4	16	<=0.06	<=0.12	<=0.03	4	<=0.12	<=0.015	>64	1	blaCTX-M-14	NA	NA	NA	NA
28546	2016	INIAV	Portugal	Portugal	Livestock	Broiler_chickens	Meat	NA	0	NA	NA	Microdilution	NA	>64	4	8	<=0.03	8	0.5	<=2	<=1	1	<=0.25	<=8	<=8	8	<=0.25	4	0.5	<=0.06	<=0.12	<=0.03	4	0.25	<=0.015	8	16	NA	NA	blaSHV-12	NA	NA
28547	2016	INIAV	Portugal	Portugal	Livestock	Broiler_chickens	Meat	NA	0	NA	NA	Microdilution	NA	>64	>4	<=0.5	<=0.03	>128	8	>64	2	<=0.5	>32	>1024	<=8	8	<=0.25	4	2	<=0.06	<=0.12	<=0.03	8	<=0.12	<=0.015	32	0.5	blaCTX-M-1	NA	NA	NA	NA
28548	2016	INIAV	Portugal	Portugal	Livestock	Broiler_chickens	Meat	NA	0	NA	NA	Microdilution	NA	>64	>4	1	<=0.03	>128	0.25	>64	<=1	<=0.5	0.5	>1024	<=8	8	<=0.25	4	4	<=0.06	<=0.12	<=0.03	2	0.25	<=0.015	64	1	blaCTX-M-1	NA	NA	NA	NA
28661	2016	INIAV	Portugal	Portugal	Livestock	Broiler_chickens	Meat	NA	0	NA	NA	Microdilution	NA	>64	>4	>8	<=0.03	>128	>8	>64	<=1	1	>32	>1024	64	4	<=0.25	8	1	<=0.06	0.25	<=0.03	2	<=0.12	<=0.015	8	16	NA	blaTEM-1	blaSHV-12	NA	NA
28663	2016	INIAV	Portugal	Portugal	Livestock	Broiler_chickens	Meat	NA	0	NA	NA	Microdilution	NA	>64	>4	8	<=0.03	>128	>8	>64	<=1	>32	>32	>1024	<=8	<=2	<=0.25	8	32	<=0.06	<=0.12	<=0.03	8	<=0.12	0.06	>64	8	blaCTX-M-32	NA	NA	NA	NA
28664	2016	INIAV	Portugal	Portugal	Livestock	Broiler_chickens	Meat	NA	0	NA	NA	Microdilution	NA	>64	>4	1	<=0.03	>128	8	<=2	<=1	<=0.5	32	>1024	<=8	8	<=0.25	4	4	<=0.06	<=0.12	0.06	4	<=0.12	<=0.015	32	1	blaCTX-M-1	NA	NA	NA	NA
28665	2016	INIAV	Portugal	Portugal	Livestock	Broiler_chickens	Meat	NA	0	NA	NA	Microdilution	NA	>64	2	4	<=0.03	>128	>8	64	<=1	1	<=0.25	>1024	64	<=2	<=0.25	8	0.25	0.12	<=0.12	<=0.03	2	<=0.12	<=0.015	2	8	NA	NA	blaSHV-12	NA	NA
28675	2016	INIAV	Portugal	Portugal	Livestock	Broiler_chickens	Meat	NA	0	NA	NA	Microdilution	NA	>64	4	8	<=0.03	>128	>8	>64	<=1	1	>32	>1024	64	<=2	<=0.25	8	0.5	<=0.06	<=0.12	<=0.03	4	<=0.12	<=0.015	16	16	NA	NA	blaSHV-12	NA	NA
28676	2016	INIAV	Portugal	Portugal	Livestock	Broiler_chickens	Meat	NA	0	NA	NA	Microdilution	NA	>64	>4	2	<=0.03	>128	4	<=2	<=1	<=0.5	>32	>1024	<=8	4	<=0.25	4	8	<=0.06	<=0.12	<=0.03	4	0.25	<=0.015	32	1	blaCTX-M-1	NA	NA	NA	NA
28718	2016	INIAV	Portugal	Portugal	Livestock	Broiler_chickens	Meat	NA	0	NA	NA	Microdilution	NA	>64	>4	8	<=0.03	>128	0.5	>64	<=1	>32	>32	>1024	<=8	16	0.5	8	>32	<=0.06	<=0.12	<=0.03	8	0.25	0.03	>64	8	blaCTX-M-32	NA	NA	NA	NA
28765	2016	INIAV	Portugal	Portugal	Livestock	Broiler_chickens	Meat	NA	0	NA	NA	Microdilution	NA	>64	2	4	<=0.03	>128	>8	>64	<=1	2	>32	>1024	<=8	8	0.5	64	0.125	2	4	<=0.03	8	0.5	0.03	4	8	NA	NA	NA	NA	Mutation on the promoter of the chromossomic AmpC gene
28767	2016	INIAV	Portugal	Portugal	Livestock	Broiler_chickens	Meat	NA	0	NA	NA	Microdilution	NA	>64	>4	>8	<=0.03	>128	8	>64	<=1	<=0.5	>32	>1024	32	8	<=0.25	4	0.5	<=0.06	<=0.12	<=0.03	8	0.25	<=0.015	4	32	NA	NA	NA	NA	Mutation on the promoter of the chromossomic AmpC gene
28770	2016	INIAV	Portugal	Portugal	Livestock	Broiler_chickens	Meat	NA	0	NA	NA	Microdilution	NA	>64	2	4	<=0.03	>128	8	>64	<=1	2	>32	>1024	<=8	4	<=0.25	64	0.125	2	4	<=0.03	8	0.25	0.03	4	4	NA	NA	NA	NA	Mutation on the promoter of the chromossomic AmpC gene
29073	2016	INIAV	Portugal	Portugal	Livestock	Broiler_chickens	Meat	NA	0	NA	NA	Microdilution	NA	>64	>4	>8	<=0.03	>128	>8	>64	<=1	<=0.5	>32	>1024	64	8	0.5	4	0.5	<=0.06	<=0.12	<=0.03	8	0.25	<=0.015	8	16	NA	NA	blaSHV-12	NA	NA
29123	2016	INIAV	Portugal	Portugal	Livestock	Broiler_chickens	Meat	NA	0	NA	NA	Microdilution	NA	>64	>4	1	<=0.03	>128	>8	>64	<=1	32	>32	>1024	>128	16	0.5	4	4	<=0.06	0.25	<=0.03	8	0.25	<=0.015	64	1	blaCTX-M-14	NA	NA	NA	NA
29174	2016	INIAV	Portugal	Portugal	Livestock	Broiler_chickens	Meat	NA	0	NA	NA	Microdilution	NA	>64	>4	>8	<=0.03	>128	8	>64	<=1	>32	>32	>1024	>128	32	<=0.25	8	>32	0.12	0.25	<=0.03	16	0.25	0.03	>64	16	blaCTX-M-55	NA	NA	NA	NA
29176	2016	INIAV	Portugal	Portugal	Livestock	Broiler_chickens	Meat	NA	0	NA	NA	Microdilution	NA	>64	>4	>8	<=0.03	>128	0.5	>64	<=1	>32	>32	>1024	<=8	16	0.5	8	>32	<=0.06	<=0.12	<=0.03	8	0.5	0.03	>64	64	blaCTX-M-32	NA	NA	NA	NA
29210	2016	INIAV	Portugal	Portugal	Livestock	Broiler_chickens	Meat	NA	0	NA	NA	Microdilution	NA	>64	>4	>8	<=0.03	>128	8	64	<=1	>32	>32	>1024	>128	>64	<=0.25	8	>32	0.12	0.25	<=0.03	8	<=0.12	0.03	>64	16	blaCTX-M-55	NA	NA	NA	NA
29211	2016	INIAV	Portugal	Portugal	Livestock	Broiler_chickens	Meat	NA	0	NA	NA	Microdilution	NA	>64	4	8	<=0.03	>128	8	>64	<=1	2	0.5	>1024	32	4	<=0.25	2	0.125	<=0.06	<=0.12	<=0.03	2	0.5	<=0.015	2	4	NA	NA	blaSHV-12	NA	NA
29297	2016	INIAV	Portugal	Portugal	Livestock	Broiler_chickens	Meat	NA	0	NA	NA	Microdilution	NA	>64	4	8	<=0.03	>128	>8	64	<=1	<=0.5	>32	>1024	32	8	<=0.25	4	0.5	<=0.06	<=0.12	<=0.03	8	<=0.12	<=0.015	8	16	NA	NA	blaSHV-12	NA	NA
29298	2016	INIAV	Portugal	Portugal	Livestock	Broiler_chickens	Meat	NA	0	NA	NA	Microdilution	NA	>64	1	4	<=0.03	>128	8	64	<=1	<=0.5	<=0.25	>1024	32	4	<=0.25	2	0.125	<=0.06	<=0.12	<=0.03	2	<=0.12	<=0.015	1	4	NA	NA	blaSHV-12	NA	NA
29300	2016	INIAV	Portugal	Portugal	Livestock	Broiler_chickens	Meat	NA	0	NA	NA	Microdilution	NA	>64	>4	2	<=0.03	>128	>8	>64	<=1	1	<=0.25	>1024	<=8	8	<=0.25	4	0.5	<=0.06	<=0.12	0.06	2	<=0.12	<=0.015	8	4	NA	blaTEM-52	NA	NA	NA
29302	2016	INIAV	Portugal	Portugal	Livestock	Broiler_chickens	Meat	NA	0	NA	NA	Microdilution	NA	>64	>4	8	0.06	>128	>8	>64	<=1	1	>32	>1024	32	16	0.5	4	0.5	<=0.06	<=0.12	<=0.03	2	0.25	<=0.015	4	32	NA	blaTEM-1	NA	NA	NA
29304	2016	INIAV	Portugal	Portugal	Livestock	Broiler_chickens	Meat	NA	0	NA	NA	Microdilution	NA	>64	4	>8	<=0.03	>128	>8	>64	<=1	1	>32	>1024	<=8	4	<=0.25	8	0.5	<=0.06	0.25	<=0.03	8	<=0.12	<=0.015	8	32	NA	blaTEM-1	NA	NA	NA
29306	2016	INIAV	Portugal	Portugal	Livestock	Broiler_chickens	Meat	NA	0	NA	NA	Microdilution	NA	>64	2	8	<=0.03	>128	0.25	>64	<=1	<=0.5	>32	>1024	<=8	8	<=0.25	4	0.5	<=0.06	<=0.12	<=0.03	8	<=0.12	<=0.015	4	16	NA	NA	blaSHV-12	NA	NA
29307	2016	INIAV	Portugal	Portugal	Livestock	Broiler_chickens	Meat	NA	1	NA	ERS8292186	Microdilution	NA	>64	2	8	<=0.03	<=4	<=0.015	64	<=1	<=0.5	0.5	>1024	64	8	0.5	4	0.5	<=0.06	<=0.12	<=0.03	2	0.25	<=0.015	4	32	NA	NA	blaSHV-12	NA	NA
29308	2016	INIAV	Portugal	Portugal	Livestock	Broiler_chickens	Meat	NA	0	NA	NA	Microdilution	NA	>64	2	4	<=0.03	>128	>8	>64	<=1	1	>32	>1024	<=8	8	0.5	64	0.125	1	4	<=0.03	4	0.25	0.03	2	4	NA	blaTEM-1	NA	NA	Mutation on the promoter of the chromossomic AmpC gene
29505	2016	INIAV	Portugal	Portugal	Livestock	Broiler_chickens	Meat	NA	0	NA	NA	Microdilution	NA	>64	>4	>8	<=0.03	>128	0.25	<=2	<=1	<=0.5	<=0.25	16	<=8	8	<=0.25	8	1	<=0.06	<=0.12	<=0.03	8	<=0.12	<=0.015	4	32	NA	NA	blaSHV-12	NA	NA
29506	2016	INIAV	Portugal	Portugal	Livestock	Broiler_chickens	Meat	NA	0	NA	NA	Microdilution	NA	>64	>4	1	<=0.03	>128	0.5	>64	<=1	<=0.5	0.5	>1024	<=8	4	<=0.25	4	8	<=0.06	<=0.12	<=0.03	8	0.25	<=0.015	32	2	blaCTX-M-1	NA	NA	NA	NA
29508	2016	INIAV	Portugal	Portugal	Livestock	Broiler_chickens	Meat	NA	0	NA	NA	Microdilution	NA	>64	>4	8	<=0.03	>128	0.03	64	<=1	<=0.5	<=0.25	>1024	32	8	0.5	4	1	<=0.06	<=0.12	<=0.03	2	<=0.12	<=0.015	8	16	blaCTX-M-55	NA	blaSHV-12	NA	NA
29509	2016	INIAV	Portugal	Portugal	Livestock	Broiler_chickens	Meat	NA	0	NA	NA	Microdilution	NA	>64	>4	8	0.06	>128	>8	64	<=1	<=0.5	>32	>1024	128	8	<=0.25	4	16	<=0.06	<=0.12	<=0.03	2	<=0.12	0.03	>64	8	blaCTX-M-55	NA	NA	NA	NA
29510	2016	INIAV	Portugal	Portugal	Livestock	Broiler_chickens	Meat	NA	0	NA	NA	Microdilution	NA	>64	>4	2	<=0.03	>128	0.5	>64	<=1	1	>32	>1024	>128	>64	0.5	8	16	<=0.06	0.25	<=0.03	8	0.25	<=0.015	64	4	blaCTX-M-1	NA	NA	NA	NA
29511	2016	INIAV	Portugal	Portugal	Livestock	Broiler_chickens	Meat	NA	0	NA	NA	Microdilution	NA	>64	1	>8	<=0.03	>128	>8	>64	<=1	<=0.5	>32	>1024	32	8	0.5	4	0.5	<=0.06	<=0.12	<=0.03	4	0.25	<=0.015	16	32	NA	NA	blaSHV-12	NA	NA
29518	2016	INIAV	Portugal	Portugal	Livestock	Broiler_chickens	Meat	NA	0	NA	NA	Microdilution	NA	>64	>4	<=0.5	<=0.03	>128	>8	4	8	1	>32	16	128	8	<=0.25	8	32	<=0.06	<=0.12	<=0.03	2	0.25	0.06	>64	1	blaCTX-M-14	NA	NA	NA	NA
29519	2016	INIAV	Portugal	Portugal	Livestock	Broiler_chickens	Meat	NA	0	NA	NA	Microdilution	NA	>64	>4	1	<=0.03	<=4	0.03	64	<=1	<=0.5	0.5	>1024	<=8	8	0.5	4	8	<=0.06	0.25	<=0.03	2	0.25	<=0.015	32	1	blaCTX-M-1	NA	NA	NA	NA
29528	2016	INIAV	Portugal	Portugal	Livestock	Broiler_chickens	Meat	NA	0	NA	NA	Microdilution	NA	>64	>4	<=0.5	<=0.03	>128	8	>64	<=1	<=0.5	>32	>1024	<=8	8	<=0.25	4	4	<=0.06	<=0.12	<=0.03	4	0.25	<=0.015	32	0.5	blaCTX-M-1	NA	NA	NA	NA
29660	2016	INIAV	Portugal	Portugal	Livestock	Broiler_chickens	Meat	NA	0	NA	NA	Microdilution	NA	>64	2	8	<=0.03	>128	8	>64	<=1	1	<=0.25	<=8	<=8	4	<=0.25	4	0.5	<=0.06	<=0.12	<=0.03	16	0.25	<=0.015	4	16	NA	NA	blaSHV-12	NA	NA
29665	2016	INIAV	Portugal	Portugal	Livestock	Broiler_chickens	Meat	NA	0	NA	NA	Microdilution	NA	>64	2	4	<=0.03	>128	>8	>64	<=1	2	>32	>1024	<=8	8	<=0.25	32	0.125	2	4	<=0.03	4	0.25	0.03	2	4	NA	NA	NA	NA	Mutation on the promoter of the chromossomic AmpC gene
29667	2016	INIAV	Portugal	Portugal	Livestock	Broiler_chickens	Meat	NA	0	NA	NA	Microdilution	NA	>64	>4	>8	<=0.03	>128	0.25	>64	<=1	<=0.5	0.5	>1024	32	8	<=0.25	4	1	<=0.06	<=0.12	<=0.03	8	<=0.12	<=0.015	8	32	NA	NA	blaSHV-12	NA	NA
30997	2017	INIAV	Portugal	Portugal	Livestock	Cattle	Meat	NA	0	NA	NA	Microdilution	NA	>64	>4	<=0.5	<=0.03	128	0.25	>64	<=1	<=0.5	0.5	>1024	>128	4	<=0.25	4	16	<=0.06	<=0.12	<=0.03	8	<=0.12	<=0.015	16	1	blaCTX-M-1	NA	NA	NA	NA
31095	2016	INIAV	Portugal	Portugal	Livestock	Broiler_chickens	Meat	NA	0	NA	NA	Microdilution	NA	>64	>4	1	<=0.03	>128	0.25	>64	<=1	<=0.5	0.5	>1024	<=8	4	<=0.25	4	8	<=0.06	<=0.12	<=0.03	8	0.25	<=0.015	64	1	blaCTX-M-1	NA	NA	NA	NA
31102	2016	INIAV	Portugal	Portugal	Livestock	Broiler_chickens	Meat	NA	0	NA	NA	Microdilution	NA	>64	>4	>8	<=0.03	>128	>8	32	4	<=0.5	>32	>1024	128	8	<=0.25	8	>32	<=0.06	0.25	<=0.03	16	0.25	0.03	>64	32	blaCTX-M-55	NA	NA	NA	NA
31103	2016	INIAV	Portugal	Portugal	Livestock	Broiler_chickens	Meat	NA	0	NA	NA	Microdilution	NA	>64	2	4	<=0.03	>128	>8	>64	<=1	2	>32	>1024	<=8	8	<=0.25	>64	<=0,06	2	4	<=0.03	8	0.25	0.06	4	8	NA	NA	NA	NA	Mutations on the promoter region of the chromossomic AmpC
31113	2017	INIAV	Portugal	Portugal	Livestock	Cattle	Meat	NA	0	NA	NA	Microdilution	NA	>64	>4	1	<=0.03	128	0.25	64	<=1	<=0.5	<=0.25	>1024	<=8	<=2	<=0.25	4	8	<=0.06	<=0.12	<=0.03	8	<=0.12	<=0.015	32	2	blaCTX-M-1	NA	NA	NA	NA
31114	2017	INIAV	Portugal	Portugal	Livestock	Pigs	Meat	NA	0	NA	NA	Microdilution	NA	>64	>4	2	<=0.03	>128	>8	>64	<=1	<=0.5	>32	>1024	<=8	>64	<=0.25	8	2	<=0.06	0.25	<=0.03	8	<=0.12	<=0.015	32	4	blaCTX-M-27	NA	NA	NA	NA
31119	2017	INIAV	Portugal	Portugal	Livestock	Pigs	Meat	NA	0	NA	NA	Microdilution	NA	>64	>4	2	<=0.03	>128	>8	>64	<=1	<=0.5	>32	>1024	<=8	64	<=0.25	8	2	<=0.06	0.25	<=0.03	8	<=0.12	<=0.015	32	4	blaCTX-M-27	NA	NA	NA	NA
31120	2017	INIAV	Portugal	Portugal	Livestock	Cattle	Meat	NA	0	NA	NA	Microdilution	NA	>64	>4	8	<=0.03	>128	>8	>64	<=1	1	>32	>1024	<=8	<=2	<=0.25	2	<=0,06	<=0.06	<=0.12	<=0.03	2	0.25	<=0.015	4	8	NA	blaTEM-1	NA	NA	NA
31127	2016	INIAV	Portugal	Portugal	Livestock	Broiler_chickens	Meat	NA	0	NA	NA	Microdilution	NA	>64	>4	>8	<=0.03	>128	>8	>64	<=1	2	>32	>1024	128	8	<=0.25	8	>32	<=0.06	0.25	<=0.03	8	0.25	0.03	>64	8	blaCTX-M-55	NA	NA	NA	NA
31129	2016	INIAV	Portugal	Portugal	Livestock	Broiler_chickens	Meat	NA	0	NA	NA	Microdilution	NA	>64	>4	1	<=0.03	>128	>8	64	4	>32	0.5	>1024	>128	8	<=0.25	8	32	0.12	0.5	<=0.03	2	<=0.12	0.03	32	1	blaCTX-M-14	NA	NA	NA	NA
31142	2016	INIAV	Portugal	Portugal	Livestock	Broiler_chickens	Meat	NA	0	NA	NA	Microdilution	NA	>64	>4	8	<=0.03	>128	8	64	<=1	>32	0.5	16	<=8	8	<=0.25	32	0.5	16	16	<=0.03	8	0.25	0.03	8	8	NA	NA	NA	blaCMY-2	NA
31229	2016	INIAV	Portugal	Portugal	Livestock	Broiler_chickens	Meat	NA	0	NA	NA	Microdilution	NA	>64	4	8	<=0.03	128	2	<=2	<=1	<=0.5	<=0.25	<=8	<=8	8	<=0.25	4	0.5	<=0.06	<=0.12	<=0.03	4	0.25	<=0.015	4	8	NA	NA	blaSHV-12	NA	NA
31236	2017	INIAV	Portugal	Portugal	Livestock	Pigs	Meat	NA	0	NA	NA	Microdilution	NA	>64	>4	1	<=0.03	>128	0.5	<=2	<=1	<=0.5	0.5	<=8	<=8	8	<=0.25	8	8	<=0.06	0.25	<=0.03	4	<=0.12	<=0.015	32	1	blaCTX-M-32	NA	NA	NA	NA
32889	2017	INIAV	Portugal	Portugal	Livestock	Cattle	Meat	NA	1	NA	ERS3535656	Microdilution	NA	>64	>4	1	<=0.03	>128	>8	64	4	1	>32	>1024	128	32	0.5	8	4	<=0.06	<=0.12	<=0.03	8	0.25	<=0.015	64	1	blaCTX-M-65	blaTEM-1	NA	NA	NA
32896	2017	INIAV	Portugal	Portugal	Livestock	Cattle	Meat	NA	0	NA	NA	Microdilution	NA	>64	>4	8	<=0.03	128	0.25	>64	<=1	8	>32	>1024	>128	16	<=0.25	4	8	<=0.06	<=0.12	<=0.03	4	0.25	<=0.015	>64	8	blaCTX-M-15	NA	NA	NA	NA
34419	2017	INIAV	Portugal	Portugal	Livestock	Pigs	Meat	NA	0	NA	NA	Microdilution	NA	>64	>4	>8	<=0.03	>128	0.5	<=2	<=1	1	0.5	16	<=8	4	<=0.25	>64	0.25	8	16	0.06	16	0.25	0.06	8	16	NA	NA	NA	blaCMY-2	NA
34580	2017	INIAV	Portugal	Portugal	Livestock	Pigs	Meat	NA	1	NA	ERS3535661	Microdilution	NA	>64	>4	4	<=0.03	<=4	<=0.015	>64	<=1	<=0.5	<=0.25	>1024	<=8	8	<=0.25	4	8	<=0.06	<=0.12	<=0.03	2	<=0.12	<=0.015	64	4	blaCTX-M-32	NA	NA	NA	NA
35173	2017	INIAV	Portugal	Portugal	Livestock	Cattle	Meat	NA	0	NA	NA	Microdilution	NA	>64	4	>8	<=0.03	>128	>8	>64	<=1	1	>32	<=8	<=8	8	<=0.25	4	0.5	<=0.06	<=0.12	<=0.03	8	0.25	<=0.015	4	16	NA	blaTEM-1	blaSHV-12	NA	NA
35254	2017	INIAV	Portugal	Portugal	Livestock	Pigs	Meat	NA	0	NA	NA	Microdilution	NA	>64	>4	<=0.5	<=0.03	8	0.25	>64	<=1	1	>32	>1024	64	8	<=0.25	4	8	<=0.06	<=0.12	<=0.03	8	0.25	<=0.015	32	1	blaCTX-M-14	NA	NA	NA	NA
35283	2017	INIAV	Portugal	Portugal	Livestock	Cattle	Meat	NA	0	NA	NA	Microdilution	NA	>64	4	>8	<=0.03	>128	>8	64	4	1	<=0.25	>1024	32	8	0.5	4	0.5	<=0.06	<=0.12	<=0.03	8	0.25	<=0.015	4	32	NA	NA	blaSHV-12	NA	NA
35286	2017	INIAV	Portugal	Portugal	Livestock	Cattle	Meat	NA	0	NA	NA	Microdilution	NA	>64	>4	>8	<=0.03	<=4	0.03	>64	<=1	1	>32	<=8	<=8	4	<=0.25	64	0.5	8	8	0.06	4	0.5	0.03	16	16	NA	NA	NA	blaCMY-2	NA
35487	2017	INIAV	Portugal	Portugal	Livestock	Pigs	Meat	NA	0	NA	NA	Microdilution	NA	>64	>4	>8	<=0.03	32	1	4	<=1	<=0.5	4	16	16	16	1	>64	0.5	16	16	<=0.03	32	0.5	0.12	16	32	NA	NA	NA	blaCMY-2	NA
35501	2017	INIAV	Portugal	Portugal	Livestock	Cattle	Meat	NA	0	NA	NA	Microdilution	NA	>64	>4	2	<=0.03	<=4	<=0.015	>64	<=1	1	<=0.25	>1024	<=8	>64	<=0.25	8	8	<=0.06	0.5	<=0.03	4	0.25	<=0.015	32	4	blaCTX-M-1	NA	NA	NA	NA
35506	2017	INIAV	Portugal	Portugal	Livestock	Cattle	Meat	NA	1	NA	ERS3535664	Microdilution	NA	>64	>4	>8	<=0.03	>128	>8	>64	<=1	32	1	16	<=8	8	<=0.25	64	0.25	8	8	<=0.03	16	0.5	0.03	8	16	NA	blaTEM-1	NA	blaCMY-2	NA
35507	2017	INIAV	Portugal	Portugal	Livestock	Pigs	Meat	NA	0	NA	NA	Microdilution	NA	>64	>4	2	<=0.03	<=4	0.03	>64	<=1	<=0.5	>32	>1024	<=8	4	<=0.25	8	32	<=0.06	0.25	<=0.03	8	0.25	0.03	64	2	blaCTX-M-1	NA	NA	NA	NA
35510	2017	INIAV	Portugal	Portugal	Livestock	Cattle	Meat	NA	0	NA	NA	Microdilution	NA	>64	>4	>8	<=0.03	<=4	0.03	>64	<=1	1	0.5	>1024	<=8	8	<=0.25	4	32	<=0.06	0.25	<=0.03	16	0.5	<=0.015	>64	16	blaCTX-M-15	NA	NA	NA	NA
35529	2017	INIAV	Portugal	Portugal	Livestock	Pigs	Meat	NA	0	NA	NA	Microdilution	NA	>64	4	<=0.5	<=0.03	<=4	<=0.015	64	<=1	<=0.5	>32	>1024	64	4	<=0.25	1	2	<=0.06	<=0.12	<=0.03	2	<=0.12	<=0.015	4	0.5	blaCTX-M-14	NA	NA	NA	NA
35905	2017	INIAV	Portugal	Portugal	Livestock	Pigs	Meat	NA	0	NA	NA	Microdilution	NA	>64	>4	8	<=0.03	<=4	0.03	>64	<=1	32	0.5	>1024	<=8	4	<=0.25	4	8	<=0.06	0.25	<=0.03	8	0.25	0.03	64	8	blaCTX-M-32	NA	NA	NA	NA
35929	2017	INIAV	Portugal	Portugal	Livestock	Cattle	Meat	NA	0	NA	NA	Microdilution	NA	>64	4	>8	<=0.03	<=4	0.03	>64	<=1	<=0.5	<=0.25	<=8	<=8	4	<=0.25	4	0.5	<=0.06	<=0.12	<=0.03	8	<=0.12	0.03	8	32	NA	blaTEM-1	blaSHV-12	NA	NA
36339	2017	INIAV	Portugal	Portugal	Livestock	Cattle	Meat	NA	0	NA	NA	Microdilution	NA	>64	>4	1	<=0.03	>128	>8	<=2	4	1	1	>1024	128	8	<=0.25	8	4	<=0.06	<=0.12	<=0.03	8	0.25	<=0.015	64	1	blaCTX-M-14	NA	NA	NA	NA
36402	2017	INIAV	Portugal	Portugal	Livestock	Cattle	Meat	NA	1	NA	ERS5493676	Microdilution	NA	>64	>4	>8	<=0.03	>128	>8	64	<=1	1	>32	>1024	128	64	0.5	8	4	0.12	<=0.12	<=0.03	8	0.25	<=0.015	64	32	blaCTX-M-65	blaTEM-1	NA	NA	NA
36448	2017	INIAV	Portugal	Portugal	Livestock	Cattle	Meat	NA	0	NA	NA	Microdilution	NA	>64	>4	>8	<=0.03	<=4	0.03	>64	2	<=0.5	<=0.25	<=8	<=8	4	0.5	64	0.5	8	16	<=0.03	8	0.25	0.03	16	16	NA	NA	NA	blaCMY-2	NA
36461	2017	INIAV	Portugal	Portugal	Livestock	Pigs	Meat	NA	1	NA	ERS3535665	Microdilution	NA	>64	>4	>8	<=0.03	16	0.5	>64	<=1	1	>32	>1024	<=8	8	<=0.25	32	32	4	0.25	<=0.03	8	0.5	0.03	>64	16	blaCTX-M-32	NA	NA	NA	NA
36465	2017	INIAV	Portugal	Portugal	Livestock	Pigs	Meat	NA	0	NA	NA	Microdilution	NA	>64	>4	4	<=0.03	<=4	0.03	64	2	<=0.5	>32	>1024	<=8	4	0.5	4	4	<=0.06	<=0.12	<=0.03	4	0.25	<=0.015	64	1	blaCTX-M-32	NA	NA	NA	NA
36469	2017	INIAV	Portugal	Portugal	Livestock	Pigs	Meat	NA	0	NA	NA	Microdilution	NA	>64	>4	<=0.5	<=0.03	>128	8	>64	<=1	<=0.5	>32	>1024	32	4	<=0.25	16	8	<=0.06	<=0.12	<=0.03	4	0.25	<=0.015	64	1	blaCTX-M-14	NA	NA	NA	NA
36471	2017	INIAV	Portugal	Portugal	Livestock	Pigs	Meat	NA	0	NA	NA	Microdilution	NA	>64	>4	8	<=0.03	>128	0.25	>64	<=1	<=0.5	<=0.25	>1024	16	64	<=0.25	8	16	<=0.06	<=0.12	<=0.03	8	0.25	<=0.015	>64	8	blaCTX-M-32	NA	NA	NA	NA
36481	2017	INIAV	Portugal	Portugal	Livestock	Cattle	Meat	NA	0	NA	NA	Microdilution	NA	>64	>4	1	<=0.03	<=4	0.03	>64	<=1	1	>32	>1024	128	8	<=0.25	8	32	0.12	0.25	<=0.03	8	0.5	<=0.015	64	1	blaCTX-M-14	NA	NA	NA	NA
36531	2017	INIAV	Portugal	Portugal	Livestock	Pigs	Meat	NA	0	NA	NA	Microdilution	NA	>64	>4	8	<=0.03	>128	>8	>64	<=1	<=0.5	>32	<=8	32	>64	<=0.25	4	16	<=0.06	0.25	<=0.03	8	<=0.12	<=0.015	>64	16	blaCTX-M-32	NA	NA	NA	NA
36533	2017	INIAV	Portugal	Portugal	Livestock	Cattle	Meat	NA	0	NA	NA	Microdilution	NA	>64	>4	>8	<=0.03	>128	>8	4	<=1	1	>32	>1024	128	32	<=0.25	8	16	0.12	0.25	<=0.03	16	0.25	0.03	>64	16	blaCTX-M-15	NA	NA	NA	NA
36534	2017	INIAV	Portugal	Portugal	Livestock	Cattle	Meat	NA	0	NA	NA	Microdilution	NA	>64	>4	>8	<=0.03	>128	>8	4	<=1	2	>32	>1024	128	64	<=0.25	8	16	0.12	0.5	<=0.03	16	0.25	0.06	>64	16	blaCTX-M-15	NA	NA	NA	NA
36648	2017	INIAV	Portugal	Portugal	Livestock	Pigs	Meat	NA	0	NA	NA	Microdilution	NA	>64	>4	4	<=0.03	128	0.25	>64	<=1	<=0.5	>32	>1024	16	<=2	<=0.25	4	8	<=0.06	<=0.12	<=0.03	8	<=0.12	<=0.015	64	8	blaCTX-M-15	NA	NA	NA	NA
36660	2017	INIAV	Portugal	Portugal	Livestock	Cattle	Meat	NA	0	NA	NA	Microdilution	NA	>64	>4	<=0.5	<=0.03	16	0.06	<=2	<=1	4	<=0.25	>1024	<=8	4	<=0.25	8	4	<=0.06	<=0.12	<=0.03	4	0.25	0.03	32	0.5	blaCTX-M-9	NA	NA	NA	NA
36662	2017	INIAV	Portugal	Portugal	Livestock	Cattle	Meat	NA	0	NA	NA	Microdilution	NA	>64	>4	8	<=0.03	>128	>8	64	<=1	<=0.5	>32	>1024	128	4	<=0.25	8	16	<=0.06	0.25	<=0.03	8	0.25	0.03	>64	8	blaCTX-M-1	NA	NA	NA	NA
36663	2017	INIAV	Portugal	Portugal	Livestock	Pigs	Meat	NA	0	NA	NA	Microdilution	NA	>64	>4	1	<=0.03	<=4	0.03	32	<=1	<=0.5	<=0.25	>1024	<=8	>64	<=0.25	8	16	<=0.06	0.25	<=0.03	8	<=0.12	0.03	32	1	blaCTX-M-1	NA	NA	NA	NA
36664	2017	INIAV	Portugal	Portugal	Livestock	Cattle	Meat	NA	0	NA	NA	Microdilution	NA	>64	>4	1	<=0.03	64	0.12	>64	<=1	32	>32	>1024	>128	4	<=0.25	4	16	<=0.06	<=0.12	<=0.03	4	<=0.12	<=0.015	64	1	blaCTX-M-14	NA	NA	NA	NA
36748	2017	INIAV	Portugal	Portugal	Livestock	Pigs	Meat	NA	0	NA	NA	Microdilution	NA	>64	>4	4	<=0.03	<=4	<=0.015	32	<=1	<=0.5	0.5	>1024	<=8	4	<=0.25	4	2	<=0.06	<=0.12	<=0.03	8	<=0.12	<=0.015	32	4	blaCTX-M-32	NA	NA	NA	NA
38062	2017	INIAV	Portugal	Portugal	Livestock	Pigs	Meat	NA	0	NA	NA	Microdilution	NA	>64	2	8	<=0.03	>128	>8	>64	<=1	2	>32	>1024	<=8	8	<=0.25	64	0.125	1	4	<=0.03	2	0.25	0.03	2	8	NA	NA	NA	NA	Mutation on the promoter of the chromossomic AmpC gene
38302	2017	INIAV	Portugal	Portugal	Livestock	Cattle	Meat	NA	1	NA	ERS3535666	Microdilution	NA	>64	>4	1	<=0.03	>128	0.5	4	<=1	1	0.5	<=8	<=8	8	<=0.25	8	4	0.12	0.25	<=0.03	8	0.25	<=0.015	32	1	blaCTX-M-1	NA	NA	NA	NA
38332	2017	INIAV	Portugal	Portugal	Livestock	Pigs	Meat	NA	0	NA	NA	Microdilution	NA	>64	>4	2	<=0.03	<=4	<=0.015	64	<=1	<=0.5	<=0.25	>1024	<=8	4	<=0.25	4	4	<=0.06	<=0.12	<=0.03	8	<=0.12	<=0.015	16	4	blaCTX-M-32	NA	NA	NA	NA
38353	2017	INIAV	Portugal	Portugal	Livestock	Pigs	Meat	NA	1	NA	ERS3535667	Microdilution	NA	>64	>4	>8	<=0.03	128	0.5	4	<=1	<=0.5	0.5	32	<=8	4	<=0.25	64	0.5	8	16	<=0.03	8	0.25	0.06	16	32	NA	blaTEM-1	NA	blaCMY-2	NA
38359	2017	INIAV	Portugal	Portugal	Livestock	Cattle	Meat	NA	1	NA	ERS3535668	Microdilution	NA	>64	>4	>8	<=0.03	>128	>8	<=2	<=1	>32	>32	>1024	<=8	4	<=0.25	16	>32	0.12	0.25	<=0.03	16	0.25	0.12	>64	16	blaCTX-M-55	blaTEM-1	NA	NA	NA
38987	2017	INIAV	Portugal	Portugal	Livestock	Cattle	Meat	NA	1	NA	ERS5493675	Microdilution	NA	>64	>4	1	<=0.03	>128	>8	>64	4	2	>32	>1024	128	64	0.5	8	8	0.12	0.25	<=0.03	8	0.5	<=0.015	>64	2	blaCTX-M-65	blaTEM-1	NA	NA	NA
38988	2017	INIAV	Portugal	Portugal	Livestock	Pigs	Meat	NA	1	NA	ERS3535669	Microdilution	NA	>64	>4	1	<=0.03	>128	>8	>64	4	1	>32	>1024	128	32	0.5	8	2	<=0.06	0.25	<=0.03	8	0.25	<=0.015	64	1	blaCTX-M-65	blaTEM-1	NA	NA	NA
38993	2017	INIAV	Portugal	Portugal	Livestock	Cattle	Meat	NA	0	NA	NA	Microdilution	NA	>64	>4	<=0.5	<=0.03	>128	8	<=2	<=1	<=0.5	>32	>1024	<=8	8	<=0.25	4	4	<=0.06	<=0.12	<=0.03	2	<=0.12	<=0.015	32	1	blaCTX-M-14	NA	NA	NA	NA
39004	2017	INIAV	Portugal	Portugal	Livestock	Cattle	Meat	NA	0	NA	NA	Microdilution	NA	>64	>4	1	<=0.03	<=4	<=0.015	64	<=1	1	<=0.25	>1024	16	>64	<=0.25	4	16	<=0.06	<=0.12	<=0.03	8	<=0.12	<=0.015	32	2	blaCTX-M-1	NA	NA	NA	NA
39005	2017	INIAV	Portugal	Portugal	Livestock	Pigs	Meat	NA	0	NA	NA	Microdilution	NA	>64	>4	>8	<=0.03	>128	>8	>64	<=1	32	0.5	32	<=8	4	<=0.25	64	0.25	4	8	<=0.03	8	0.25	<=0.015	16	16	NA	NA	NA	blaCMY-2	NA
15073360	2015	DTU	Denmark	Denmark	Livestock	Pork	Meat	NA	1	DTU	NA	Microdilution	Microdilution	>64	4	8	<=0.03	<=4	<=0.015	64	<=1	<=0.5	>32	>1024	<=8	<=2	<=0.25	64	<=0.06	4	8	<=0.03	16	<=0.12	<=0.015	4	8	NA	NA	NA	Chromosomal AmpC	NA
15076331	2015	DTU	Denmark	Denmark	Livestock	Pork	Meat	NA	1	DTU	NA	Microdilution	Microdilution	>64	>4	2	<=0.03	>128	<=0.015	>64	<=1	<=0.5	>32	>1024	<=8	8	<=0.25	8	4	<=0.06	<=0.12	<=0.03	8	<=0.12	<=0.015	32	2	blaCTX-M-1	NA	NA	NA	NA
15078257	2015	DTU	Denmark	Denmark	Livestock	Pigs	Faeces	NA	1	DTU	NA	Microdilution	Microdilution	>64	2	8	<=0.03	<=4	<=0.015	64	<=1	<=0.5	>32	>1024	<=8	4	<=0.25	64	<=0.06	2	8	<=0.03	8	<=0.12	<=0.015	2	8	NA	NA	NA	Chromosomal AmpC	NA
15078279	2015	DTU	Denmark	Denmark	Livestock	Pigs	Faeces	NA	1	DTU	NA	Microdilution	Microdilution	>64	>4	1	<=0.03	<=4	<=0.015	64	<=1	2	>32	>1024	<=8	4	<=0.25	4	16	<=0.06	<=0.12	<=0.03	16	<=0.12	<=0.015	32	2	blaCTX-M-1	NA	NA	NA	NA
15078283	2015	DTU	Denmark	Denmark	Livestock	Pigs	Faeces	NA	1	DTU	NA	Microdilution	Microdilution	>64	2	4	<=0.03	<=4	<=0.015	>64	<=1	<=0.5	<=0.25	>1024	<=8	4	<=0.25	32	<=0.06	2	4	<=0.03	8	<=0.12	<=0.015	2	4	NA	NA	NA	Chromosomal AmpC	NA
15078284	2015	DTU	Denmark	Denmark	Livestock	Pigs	Faeces	NA	1	DTU	NA	Microdilution	Microdilution	>64	4	8	<=0.03	<=4	<=0.015	4	<=1	<=0.5	>32	<=8	<=8	4	<=0.25	64	<=0.06	2	8	<=0.03	8	<=0.12	<=0.015	4	8	NA	NA	NA	Chromosomal AmpC	NA
15078285	2015	DTU	Denmark	Denmark	Livestock	Pigs	Faeces	NA	1	DTU	NA	Microdilution	Microdilution	>64	>4	2	<=0.03	<=4	<=0.015	<=2	<=1	<=0.5	<=0.25	<=8	<=8	<=2	<=0.25	4	16	<=0.06	<=0.12	<=0.03	8	<=0.12	<=0.015	32	2	blaCTX-M-1	NA	NA	NA	NA
15078479	2015	DTU	Denmark	Denmark	Livestock	Pigs	Faeces	NA	1	DTU	NA	Microdilution	Microdilution	>64	>4	2	<=0.03	<=4	<=0.015	64	<=1	<=0.5	>32	>1024	<=8	8	<=0.25	4	2	<=0.06	<=0.12	<=0.03	8	<=0.12	<=0.015	16	1	blaCTX-M-1	NA	NA	NA	NA
15078483	2015	DTU	Denmark	Denmark	Livestock	Pigs	Faeces	NA	1	DTU	NA	Microdilution	Microdilution	>64	2	4	<=0.03	<=4	<=0.015	<=2	<=1	<=0.5	<=0.25	<=8	<=8	<=2	<=0.25	32	<=0.06	1	2	<=0.03	4	<=0.12	<=0.015	2	4	NA	NA	NA	Chromosomal AmpC	NA
15079197	2015	DTU	Denmark	Denmark	Livestock	Cattle	Faeces	NA	1	DTU	NA	Microdilution	Microdilution	>64	>4	1	<=0.03	<=4	<=0.015	<=2	<=1	<=0.5	<=0.25	<=8	<=8	4	<=0.25	2	4	<=0.06	<=0.12	<=0.03	4	<=0.12	<=0.015	32	1	blaCTX-M-1	NA	NA	NA	NA
15079715	2015	DTU	Denmark	Germany	Livestock	Beef	Meat	NA	1	DTU	NA	Microdilution	Microdilution	>64	>4	1	<=0.03	<=4	<=0.015	16	<=1	16	<=0.25	<=8	<=8	<=2	<=0.25	4	8	<=0.06	<=0.12	<=0.03	4	<=0.12	<=0.015	32	<=0.25	blaCTX-M-1	NA	NA	NA	NA
15079951	2015	DTU	Denmark	Denmark	Livestock	Pigs	Faeces	NA	1	DTU	NA	Microdilution	Microdilution	>64	2	4	<=0.03	<=4	<=0.015	>64	<=1	<=0.5	<=0.25	>1024	<=8	4	<=0.25	32	<=0.06	2	4	<=0.03	8	<=0.12	<=0.015	2	4	NA	NA	NA	Chromosomal AmpC	NA
15079953	2015	DTU	Denmark	Denmark	Livestock	Pigs	Faeces	NA	1	DTU	NA	Microdilution	Microdilution	>64	2	4	<=0.03	<=4	<=0.015	<=2	<=1	<=0.5	>32	>1024	<=8	4	<=0.25	32	<=0.06	2	4	<=0.03	8	<=0.12	<=0.015	4	8	NA	NA	NA	Chromosomal AmpC	NA
15080719	2015	DTU	Denmark	Denmark	Livestock	Cattle	Faeces	NA	1	DTU	NA	Microdilution	Microdilution	>64	>4	1	<=0.03	<=4	<=0.015	<=2	<=1	1	>32	<=8	<=8	8	<=0.25	2	4	<=0.06	<=0.12	<=0.03	8	<=0.12	<=0.015	32	1	blaCTX-M-1	NA	NA	NA	NA
15080851	2015	DTU	Denmark	Denmark	Livestock	Pigs	Faeces	NA	1	DTU	NA	Microdilution	Microdilution	>64	2	8	<=0.03	<=4	<=0.015	<=2	<=1	16	>32	>1024	<=8	<=2	<=0.25	32	<=0.06	2	4	<=0.03	8	<=0.12	<=0.015	2	8	NA	NA	NA	Chromosomal AmpC	NA
15082472	2015	DTU	Denmark	Denmark	Livestock	Pigs	Faeces	NA	1	DTU	NA	Microdilution	Microdilution	>64	>4	1	<=0.03	<=4	<=0.015	<=2	<=1	1	>32	>1024	<=8	4	<=0.25	4	4	<=0.06	<=0.12	<=0.03	4	<=0.12	<=0.015	16	1	blaCTX-M-1	NA	NA	NA	NA
15083178	2015	DTU	Denmark	Denmark	Livestock	Pigs	Faeces	NA	1	DTU	NA	Microdilution	Microdilution	>64	2	>8	<=0.03	<=4	<=0.015	>64	<=1	<=0.5	>32	>1024	<=8	8	<=0.25	32	<=0.06	1	4	<=0.03	8	<=0.12	<=0.015	2	4	NA	NA	NA	Chromosomal AmpC	NA
15083180	2015	DTU	Denmark	Denmark	Livestock	Pigs	Faeces	NA	1	DTU	NA	Microdilution	Microdilution	>64	>4	1	<=0.03	<=4	<=0.015	64	<=1	<=0.5	>32	>1024	<=8	<=2	<=0.25	4	8	<=0.06	<=0.12	<=0.03	8	<=0.12	<=0.015	32	1	blaCTX-M-1	NA	NA	NA	NA
15083185	2015	DTU	Denmark	Denmark	Livestock	Pigs	Faeces	NA	1	DTU	NA	Microdilution	Microdilution	>64	>4	1	<=0.03	<=4	<=0.015	<=2	<=1	1	>32	>1024	<=8	4	<=0.25	2	4	<=0.06	<=0.12	<=0.03	4	<=0.12	<=0.015	16	2	blaCTX-M-1	NA	NA	NA	NA
15083204	2015	DTU	Denmark	Denmark	Livestock	Pigs	Faeces	NA	1	DTU	NA	Microdilution	Microdilution	>64	>4	<=0.5	<=0.03	<=4	<=0.015	64	<=1	16	>32	>1024	<=8	4	<=0.25	4	4	<=0.06	<=0.12	<=0.03	4	<=0.12	<=0.015	16	<=0.25	blaCTX-M-1	NA	NA	NA	NA
15083205	2015	DTU	Denmark	Denmark	Livestock	Pigs	Faeces	NA	1	DTU	NA	Microdilution	Microdilution	>64	>4	8	<=0.03	<=4	<=0.015	<=2	<=1	<=0.5	<=0.25	>1024	<=8	4	<=0.25	32	<=0.06	4	4	<=0.03	8	<=0.12	<=0.015	8	8	NA	NA	NA	blaCMY-2	NA
15083210	2015	DTU	Denmark	Denmark	Livestock	Pigs	Faeces	NA	1	DTU	NA	Microdilution	Microdilution	>64	2	4	<=0.03	<=4	<=0.015	>64	<=1	<=0.5	<=0.25	<=8	<=8	4	<=0.25	32	<=0.06	1	2	<=0.03	4	<=0.12	<=0.015	2	4	NA	NA	NA	Chromosomal AmpC	NA
15083211	2015	DTU	Denmark	Denmark	Livestock	Pigs	Faeces	NA	1	DTU	NA	Microdilution	Microdilution	>64	2	4	<=0.03	<=4	<=0.015	<=2	<=1	<=0.5	<=0.25	<=8	<=8	8	<=0.25	32	<=0.06	1	2	<=0.03	4	<=0.12	<=0.015	2	4	NA	NA	NA	Chromosomal AmpC	NA
15083216	2015	DTU	Denmark	Denmark	Livestock	Pigs	Faeces	NA	1	DTU	NA	Microdilution	Microdilution	>64	2	4	<=0.03	<=4	<=0.015	<=2	<=1	<=0.5	<=0.25	<=8	<=8	8	<=0.25	16	<=0.06	<=0.06	2	<=0.03	8	<=0.12	<=0.015	2	4	NA	NA	NA	Chromosomal AmpC	NA
15083253	2015	DTU	Denmark	Denmark	Livestock	Cattle	Faeces	NA	1	DTU	NA	Microdilution	Microdilution	64	2	4	<=0.03	<=4	<=0.015	<=2	<=1	<=0.5	<=0.25	<=8	<=8	<=2	<=0.25	32	<=0.06	1	1	<=0.03	4	<=0.12	<=0.015	1	2	NA	NA	NA	Chromosomal AmpC	NA
15084086	2015	DTU	Denmark	Denmark	Livestock	Pigs	Faeces	NA	1	DTU	NA	Microdilution	Microdilution	>64	2	8	<=0.03	<=4	<=0.015	<=2	<=1	<=0.5	<=0.25	<=8	<=8	8	<=0.25	32	<=0.06	1	4	<=0.03	4	<=0.12	<=0.015	4	4	NA	NA	NA	Chromosomal AmpC	NA
15085377	2015	DTU	Denmark	Denmark	Livestock	Pigs	Faeces	NA	1	DTU	NA	Microdilution	Microdilution	>64	>4	1	<=0.03	<=4	<=0.015	32	<=1	<=0.5	>32	>1024	<=8	<=2	<=0.25	4	4	<=0.06	<=0.12	<=0.03	4	<=0.12	<=0.015	16	1	blaCTX-M-1	NA	NA	NA	NA
15085380	2015	DTU	Denmark	Denmark	Livestock	Pigs	Faeces	NA	1	DTU	NA	Microdilution	Microdilution	>64	2	4	<=0.03	<=4	<=0.015	64	<=1	<=0.5	>32	<=8	<=8	4	<=0.25	32	<=0.06	1	4	<=0.03	8	<=0.12	<=0.015	2	4	NA	NA	NA	Chromosomal AmpC	NA
15085381	2015	DTU	Denmark	Denmark	Livestock	Pigs	Faeces	NA	1	DTU	NA	Microdilution	Microdilution	>64	1	2	<=0.03	<=4	<=0.015	<=2	<=1	<=0.5	>32	<=8	<=8	4	<=0.25	32	<=0.06	1	2	<=0.03	4	<=0.12	<=0.015	2	4	NA	NA	NA	Chromosomal AmpC	NA
15085382	2015	DTU	Denmark	Denmark	Livestock	Pigs	Faeces	NA	1	DTU	NA	Microdilution	Microdilution	>64	>4	8	<=0.03	<=4	<=0.015	>64	<=1	<=0.5	<=0.25	<=8	<=8	4	<=0.25	16	<=0.06	4	8	<=0.03	8	<=0.12	<=0.015	4	8	NA	NA	NA	Chromosomal AmpC	NA
15086597	2015	DTU	Denmark	Germany	Livestock	Beef	Meat	NA	1	DTU	NA	Microdilution	Microdilution	>64	>4	8	<=0.03	<=4	<=0.015	32	<=1	1	<=0.25	<=8	>128	4	<=0.25	4	32	<=0.06	<=0.12	<=0.03	16	<=0.12	<=0.015	64	8	blaCTX-M-15	NA	NA	NA	NA
15086604	2015	DTU	Denmark	Denmark	Livestock	Pork	Meat	NA	1	DTU	NA	Microdilution	Microdilution	>64	1	4	<=0.03	<=4	<=0.015	<=2	<=1	1	<=0.25	<=8	<=8	4	<=0.25	16	<=0.06	1	2	<=0.03	8	<=0.12	<=0.015	1	2	blaCTX-M-15	NA	NA	Chromosomal AmpC	NA
15086612	2015	DTU	Denmark	Germany	Livestock	Pork	Meat	NA	1	DTU	NA	Microdilution	Microdilution	>64	>4	8	<=0.03	128	<=0.015	32	<=1	<=0.5	>32	>1024	<=8	4	<=0.25	8	16	<=0.06	<=0.12	<=0.03	8	<=0.12	<=0.015	>64	16	blaCTX-M-15	NA	NA	NA	NA
15087479	2015	DTU	Denmark	Denmark	Livestock	Pigs	Faeces	NA	1	DTU	NA	Microdilution	Microdilution	>64	2	8	<=0.03	<=4	<=0.015	>64	<=1	<=0.5	<=0.25	<=8	<=8	4	<=0.25	64	<=0.06	2	8	<=0.03	8	<=0.12	<=0.015	2	8	NA	NA	NA	Chromosomal AmpC	NA
15088175	2015	DTU	Denmark	Germany	Livestock	Beef	Meat	NA	1	DTU	NA	Microdilution	Microdilution	>64	>4	1	<=0.03	64	<=0.015	<=2	<=1	32	<=0.25	>1024	<=8	4	<=0.25	4	8	<=0.06	<=0.12	<=0.03	4	<=0.12	<=0.015	32	1	blaCTX-M-1	NA	NA	NA	NA
15089122	2015	DTU	Denmark	Denmark	Livestock	Pigs	Faeces	NA	1	DTU	NA	Microdilution	Microdilution	>64	1	2	<=0.03	<=4	<=0.015	64	<=1	<=0.5	<=0.25	>1024	<=8	<=2	<=0.25	32	<=0.06	1	2	<=0.03	4	<=0.12	<=0.015	1	2	NA	NA	NA	Chromosomal AmpC	NA
15089123	2015	DTU	Denmark	Denmark	Livestock	Pigs	Faeces	NA	1	DTU	NA	Microdilution	Microdilution	>64	1	2	<=0.03	<=4	<=0.015	<=2	<=1	<=0.5	>32	>1024	<=8	4	<=0.25	16	<=0.06	1	2	<=0.03	8	<=0.12	<=0.015	1	2	NA	NA	NA	Chromosomal AmpC	NA
15089666	2015	DTU	Denmark	Denmark	Livestock	Pigs	Faeces	NA	1	DTU	NA	Microdilution	Microdilution	>64	1	4	<=0.03	<=4	<=0.015	>64	<=1	<=0.5	>32	>1024	<=8	4	<=0.25	32	<=0.06	1	4	<=0.03	8	<=0.12	<=0.015	2	4	NA	NA	NA	Chromosomal AmpC	NA
15090169	2015	DTU	Denmark	Denmark	Livestock	Pigs	Faeces	NA	1	DTU	NA	Microdilution	Microdilution	>64	2	4	<=0.03	<=4	<=0.015	64	<=1	16	<=0.25	>1024	<=8	8	<=0.25	64	<=0.06	2	4	<=0.03	8	<=0.12	<=0.015	2	4	NA	NA	NA	Chromosomal AmpC	NA
15090171	2015	DTU	Denmark	Denmark	Livestock	Pigs	Faeces	NA	1	DTU	NA	Microdilution	Microdilution	>64	4	8	<=0.03	<=4	<=0.015	<=2	<=1	<=0.5	>32	<=8	<=8	4	<=0.25	32	<=0.06	2	8	<=0.03	8	<=0.12	<=0.015	4	8	NA	NA	NA	Chromosomal AmpC	NA
15090172	2015	DTU	Denmark	Denmark	Livestock	Pigs	Faeces	NA	1	DTU	NA	Microdilution	Microdilution	>64	>4	1	<=0.03	<=4	<=0.015	<=2	<=1	1	>32	>1024	<=8	4	<=0.25	4	4	<=0.06	<=0.12	<=0.03	8	<=0.12	<=0.015	16	<=0.25	blaCTX-M-1	NA	NA	NA	NA
15090173	2015	DTU	Denmark	Denmark	Livestock	Pigs	Faeces	NA	1	DTU	NA	Microdilution	Microdilution	>64	2	8	<=0.03	<=4	<=0.015	<=2	<=1	<=0.5	<=0.25	>1024	<=8	4	<=0.25	64	<=0.06	1	4	<=0.03	8	<=0.12	<=0.015	2	4	NA	NA	NA	Chromosomal AmpC	NA
15090206	2015	DTU	Denmark	Denmark	Livestock	Pigs	Faeces	NA	1	DTU	NA	Microdilution	Microdilution	>64	2	4	<=0.03	<=4	<=0.015	>64	<=1	8	>32	>1024	<=8	4	<=0.25	32	<=0.06	1	2	<=0.03	4	<=0.12	<=0.015	2	4	NA	NA	NA	Chromosomal AmpC	NA
15090208	2015	DTU	Denmark	Denmark	Livestock	Pigs	Faeces	NA	1	DTU	NA	Microdilution	Microdilution	>64	2	4	<=0.03	<=4	<=0.015	<=2	<=1	<=0.5	<=0.25	<=8	<=8	8	<=0.25	32	<=0.06	2	4	<=0.03	8	<=0.12	<=0.015	2	4	NA	NA	NA	Chromosomal AmpC	NA
15091340	2015	DTU	Denmark	Denmark	Livestock	Cattle	Faeces	NA	1	DTU	NA	Microdilution	Microdilution	>64	1	2	<=0.03	<=4	<=0.015	<=2	<=1	<=0.5	<=0.25	<=8	<=8	4	<=0.25	16	<=0.06	1	2	<=0.03	8	<=0.12	<=0.015	1	4	NA	NA	NA	Chromosomal AmpC	NA
15092881	2015	DTU	Denmark	Denmark	Livestock	Cattle	Faeces	NA	1	DTU	NA	Microdilution	Microdilution	>64	>4	2	<=0.03	<=4	<=0.015	64	<=1	16	>32	>1024	>128	4	<=0.25	4	8	<=0.06	<=0.12	<=0.03	8	<=0.12	<=0.015	32	2	blaCTX-M-1	NA	NA	NA	NA
15093352	2015	DTU	Denmark	Denmark	Livestock	Pigs	Faeces	NA	1	DTU	NA	Microdilution	Microdilution	>64	2	4	<=0.03	<=4	<=0.015	>64	<=1	16	>32	>1024	<=8	4	<=0.25	32	<=0.06	1	4	<=0.03	4	<=0.12	<=0.015	2	4	NA	NA	NA	Chromosomal AmpC	NA
15093354	2015	DTU	Denmark	Denmark	Livestock	Pigs	Faeces	NA	1	DTU	NA	Microdilution	Microdilution	>64	2	8	<=0.03	<=4	<=0.015	>64	<=1	<=0.5	>32	>1024	<=8	8	<=0.25	64	<=0.06	2	8	<=0.03	8	<=0.12	<=0.015	2	8	NA	NA	NA	Chromosomal AmpC	NA
15093648	2015	DTU	Denmark	Denmark	Livestock	Pigs	Faeces	NA	1	DTU	NA	Microdilution	Microdilution	>64	2	8	<=0.03	<=4	<=0.015	4	<=1	1	<=0.25	<=8	<=8	8	<=0.25	64	<=0.06	2	8	<=0.03	8	<=0.12	<=0.015	2	8	NA	NA	NA	Chromosomal AmpC	NA
15093651	2015	DTU	Denmark	Denmark	Livestock	Pigs	Faeces	NA	1	DTU	NA	Microdilution	Microdilution	>64	1	4	<=0.03	<=4	<=0.015	>64	<=1	1	>32	>1024	<=8	8	<=0.25	16	<=0.06	1	2	<=0.03	8	<=0.12	<=0.015	2	4	NA	NA	NA	Chromosomal AmpC	NA
15093653	2015	DTU	Denmark	Denmark	Livestock	Pigs	Faeces	NA	1	DTU	NA	Microdilution	Microdilution	>64	4	8	<=0.03	<=4	<=0.015	<=2	<=1	<=0.5	<=0.25	<=8	<=8	8	<=0.25	32	<=0.06	2	4	<=0.03	4	<=0.12	<=0.015	2	8	NA	NA	NA	Chromosomal AmpC	NA
15094677	2015	DTU	Denmark	Denmark	Livestock	Cattle	Faeces	NA	1	DTU	NA	Microdilution	Microdilution	>64	1	4	<=0.03	<=4	<=0.015	>64	<=1	1	<=0.25	>1024	<=8	8	<=0.25	16	<=0.06	1	2	<=0.03	8	<=0.12	<=0.015	1	2	NA	NA	NA	Chromosomal AmpC	NA
15094687	2015	DTU	Denmark	Denmark	Livestock	Cattle	Faeces	NA	1	DTU	NA	Microdilution	Microdilution	>64	4	8	<=0.03	<=4	<=0.015	<=2	<=1	1	<=0.25	<=8	<=8	8	<=0.25	4	2	<=0.06	<=0.12	<=0.03	8	<=0.12	<=0.015	4	8	NA	blaTEM-52B	NA	NA	NA
15095098	2015	DTU	Denmark	Germany	Livestock	Beef	Meat	NA	1	DTU	NA	Microdilution	Microdilution	>64	>4	>8	<=0.03	<=4	<=0.015	<=2	<=1	1	<=0.25	<=8	<=8	8	<=0.25	8	32	<=0.06	<=0.12	<=0.03	8	<=0.12	<=0.015	>64	16	blaCTX-M-32	NA	NA	NA	NA
15095383	2015	DTU	Denmark	Denmark	Livestock	Pigs	Faeces	NA	1	DTU	NA	Microdilution	Microdilution	>64	1	2	<=0.03	<=4	<=0.015	64	<=1	<=0.5	<=0.25	<=8	<=8	4	<=0.25	8	<=0.06	<=0.06	2	<=0.03	4	<=0.12	<=0.015	1	2	NA	NA	NA	Chromosomal AmpC	NA
15097557	2015	DTU	Denmark	Denmark	Livestock	Pigs	Faeces	NA	1	DTU	NA	Microdilution	Microdilution	>64	2	4	<=0.03	<=4	<=0.015	>64	<=1	<=0.5	<=0.25	<=8	<=8	8	<=0.25	32	<=0.06	2	4	<=0.03	8	<=0.12	<=0.015	2	8	NA	NA	NA	Chromosomal AmpC	NA
15097558	2015	DTU	Denmark	Denmark	Livestock	Pigs	Faeces	NA	1	DTU	NA	Microdilution	Microdilution	>64	2	4	<=0.03	<=4	<=0.015	<=2	<=1	1	>32	>1024	<=8	4	<=0.25	64	<=0.06	2	4	<=0.03	8	<=0.12	<=0.015	4	8	NA	NA	NA	Chromosomal AmpC	NA
15097577	2015	DTU	Denmark	Denmark	Livestock	Pigs	Faeces	NA	1	DTU	NA	Microdilution	Microdilution	>64	>4	<=0.5	<=0.03	<=4	<=0.015	<=2	<=1	1	<=0.25	>1024	<=8	4	<=0.25	2	2	<=0.06	<=0.12	<=0.03	4	<=0.12	<=0.015	16	<=0.25	blaCTX-M-1	NA	NA	NA	NA
15097579	2015	DTU	Denmark	Denmark	Livestock	Pigs	Faeces	NA	1	DTU	NA	Microdilution	Microdilution	>64	4	8	<=0.03	<=4	<=0.015	>64	<=1	<=0.5	<=0.25	<=8	<=8	8	<=0.25	16	<=0.06	2	8	<=0.03	8	<=0.12	<=0.015	4	8	NA	NA	NA	Chromosomal AmpC	NA
15097580	2015	DTU	Denmark	Denmark	Livestock	Pigs	Faeces	NA	1	DTU	NA	Microdilution	Microdilution	>64	>4	8	<=0.03	<=4	<=0.015	>64	<=1	<=0.5	<=0.25	<=8	<=8	8	<=0.25	16	<=0.06	2	8	<=0.03	8	<=0.12	<=0.015	4	8	NA	NA	NA	Chromosomal AmpC	NA
15097616	2015	DTU	Denmark	Denmark	Livestock	Pigs	Faeces	NA	1	DTU	NA	Microdilution	Microdilution	>64	4	4	<=0.03	<=4	<=0.015	>64	<=1	1	>32	>1024	<=8	4	<=0.25	64	<=0.06	2	4	<=0.03	8	<=0.12	<=0.015	2	8	NA	NA	NA	Chromosomal AmpC	NA
15097617	2015	DTU	Denmark	Denmark	Livestock	Pigs	Faeces	NA	1	DTU	NA	Microdilution	Microdilution	>64	2	4	<=0.03	<=4	<=0.015	<=2	<=1	<=0.5	<=0.25	<=8	<=8	8	<=0.25	32	<=0.06	1	2	<=0.03	4	<=0.12	<=0.015	2	4	NA	NA	NA	Chromosomal AmpC	NA
15098887	2015	DTU	Denmark	Denmark	Livestock	Cattle	Faeces	NA	1	DTU	NA	Microdilution	Microdilution	>64	4	8	<=0.03	<=4	<=0.015	<=2	<=1	1	<=0.25	<=8	<=8	8	<=0.25	4	1	<=0.06	<=0.12	<=0.03	8	<=0.12	<=0.015	4	8	NA	blaTEM-52B	NA	NA	NA
15100418	2015	DTU	Denmark	Denmark	Livestock	Cattle	Faeces	NA	1	DTU	NA	Microdilution	Microdilution	>64	2	4	<=0.03	<=4	<=0.015	<=2	<=1	1	<=0.25	<=8	<=8	4	<=0.25	32	<=0.06	2	4	<=0.03	4	<=0.12	<=0.015	2	4	NA	NA	NA	Chromosomal AmpC	NA
15100708	2015	DTU	Denmark	Denmark	Livestock	Pigs	Faeces	NA	1	DTU	NA	Microdilution	Microdilution	>64	2	4	<=0.03	<=4	<=0.015	>64	<=1	<=0.5	>32	>1024	<=8	8	<=0.25	32	<=0.06	2	4	<=0.03	8	<=0.12	<=0.015	2	4	NA	NA	NA	Chromosomal AmpC	NA
15100710	2015	DTU	Denmark	Denmark	Livestock	Pigs	Faeces	NA	1	DTU	NA	Microdilution	Microdilution	>64	2	8	<=0.03	<=4	<=0.015	>64	<=1	1	<=0.25	<=8	<=8	8	<=0.25	32	<=0.06	1	4	<=0.03	4	<=0.12	<=0.015	2	8	NA	NA	NA	Chromosomal AmpC	NA
15101402	2015	DTU	Denmark	Denmark	Livestock	Pigs	Faeces	NA	1	DTU	NA	Microdilution	Microdilution	>64	2	4	<=0.03	<=4	<=0.015	<=2	<=1	<=0.5	<=0.25	<=8	<=8	8	<=0.25	32	<=0.06	2	2	<=0.03	8	<=0.12	<=0.015	2	4	NA	NA	NA	Chromosomal AmpC	NA
15101403	2015	DTU	Denmark	Denmark	Livestock	Pigs	Faeces	NA	1	DTU	NA	Microdilution	Microdilution	>64	2	4	<=0.03	<=4	<=0.015	<=2	<=1	1	<=0.25	<=8	<=8	8	<=0.25	32	<=0.06	2	4	<=0.03	8	<=0.12	<=0.015	4	4	NA	NA	NA	Chromosomal AmpC	NA
15102768	2015	DTU	Denmark	Denmark	Livestock	Cattle	Faeces	NA	1	DTU	NA	Microdilution	Microdilution	64	1	1	<=0.03	<=4	<=0.015	<=2	<=1	<=0.5	<=0.25	<=8	<=8	<=2	<=0.25	32	<=0.06	<=0.06	1	<=0.03	2	<=0.12	<=0.015	1	1	NA	NA	NA	Chromosomal AmpC	NA
15103321	2015	DTU	Denmark	Netherlands	Livestock	Beef	Meat	NA	1	DTU	NA	Microdilution	Microdilution	>64	>4	>8	<=0.03	8	<=0.015	>64	<=1	1	>32	>1024	<=8	4	<=0.25	8	16	<=0.06	<=0.12	<=0.03	8	<=0.12	<=0.015	>64	8	blaCTX-M-15	NA	NA	NA	NA
15103372	2015	DTU	Denmark	Denmark	Livestock	Beef	Meat	NA	1	DTU	NA	Microdilution	Microdilution	>64	>4	1	<=0.03	<=4	<=0.015	<=2	<=1	<=0.5	<=0.25	<=8	<=8	8	<=0.25	4	8	<=0.06	<=0.12	<=0.03	8	<=0.12	<=0.015	64	1	blaCTX-M-14	NA	NA	NA	NA
15104250	2015	DTU	Denmark	Denmark	Livestock	Cattle	Faeces	NA	1	DTU	NA	Microdilution	Microdilution	64	2	2	<=0.03	<=4	<=0.015	<=2	<=1	1	<=0.25	<=8	<=8	4	<=0.25	64	<=0.06	1	2	<=0.03	2	<=0.12	<=0.015	2	2	NA	NA	NA	Chromosomal AmpC	NA
15104342	2015	DTU	Denmark	Denmark	Livestock	Pigs	Faeces	NA	1	DTU	NA	Microdilution	Microdilution	>64	>4	8	<=0.03	<=4	<=0.015	<=2	<=1	<=0.5	<=0.25	<=8	<=8	8	<=0.25	8	16	<=0.06	<=0.12	<=0.03	8	<=0.12	<=0.015	>64	8	blaCTX-M-55	NA	NA	NA	NA
15104344	2015	DTU	Denmark	Denmark	Livestock	Pigs	Faeces	NA	1	DTU	NA	Microdilution	Microdilution	>64	2	4	<=0.03	<=4	<=0.015	>64	<=1	<=0.5	<=0.25	<=8	<=8	4	<=0.25	32	<=0.06	1	2	<=0.03	4	<=0.12	<=0.015	2	4	NA	NA	NA	Chromosomal AmpC	NA
15105279	2015	DTU	Denmark	Denmark	Livestock	Pigs	Faeces	NA	1	DTU	NA	Microdilution	Microdilution	>64	1	2	<=0.03	<=4	<=0.015	<=2	<=1	<=0.5	<=0.25	<=8	<=8	4	<=0.25	16	<=0.06	1	2	<=0.03	8	<=0.12	<=0.015	1	2	NA	NA	NA	Chromosomal AmpC	NA
15105280	2015	DTU	Denmark	Denmark	Livestock	Pigs	Faeces	NA	1	DTU	NA	Microdilution	Microdilution	>64	4	8	<=0.03	<=4	<=0.015	64	<=1	2	>32	>1024	<=8	4	<=0.25	16	<=0.06	1	4	<=0.03	8	<=0.12	<=0.015	4	4	NA	NA	NA	Chromosomal AmpC	NA
15105800	2015	DTU	Denmark	Denmark	Livestock	Pigs	Faeces	NA	1	DTU	NA	Microdilution	Microdilution	64	1	4	<=0.03	4	<=0.015	2	1	1	<=0.25	8	8	4	<=0.25	16	<=0.06	1	4	<=0.03	8	<=0.12	<=0.015	1	2	NA	NA	NA	Chromosomal AmpC	NA
15105802	2015	DTU	Denmark	Denmark	Livestock	Pigs	Faeces	NA	1	DTU	NA	Microdilution	Microdilution	>64	>4	1	<=0.03	<=4	<=0.015	64	<=1	<=0.5	>32	>1024	<=8	4	<=0.25	2	16	<=0.06	<=0.12	<=0.03	4	<=0.12	<=0.015	>64	1	blaCTX-M-14	NA	NA	NA	NA
15106535	2015	DTU	Denmark	Denmark	Livestock	Pigs	Faeces	NA	1	DTU	NA	Microdilution	Microdilution	>64	>4	1	<=0.03	<=4	<=0.015	>64	<=1	<=0.5	>32	>1024	<=8	4	<=0.25	8	4	<=0.06	<=0.12	<=0.03	8	<=0.12	<=0.015	32	1	blaCTX-M-1	NA	NA	NA	NA
15108571	2015	DTU	Denmark	Denmark	Livestock	Pigs	Faeces	NA	1	DTU	NA	Microdilution	Microdilution	64	2	4	<=0.03	4	<=0.015	64	1	<=0.5	<=0.25	1024	8	4	<=0.25	32	<=0.06	1	4	<=0.03	4	<=0.12	<=0.015	2	4	NA	NA	NA	Chromosomal AmpC	NA
15108573	2015	DTU	Denmark	Denmark	Livestock	Pigs	Faeces	NA	1	DTU	NA	Microdilution	Microdilution	>64	4	8	<=0.03	<=4	<=0.015	64	<=1	<=0.5	<=0.25	>1024	<=8	4	<=0.25	32	<=0.06	2	4	<=0.03	8	<=0.12	<=0.015	2	8	NA	NA	NA	Chromosomal AmpC	NA
15108578	2015	DTU	Denmark	Denmark	Livestock	Pigs	Faeces	NA	1	DTU	NA	Microdilution	Microdilution	64	1	4	<=0.03	4	<=0.015	64	1	2	32	1024	8	8	<=0.25	16	<=0.06	1	2	<=0.03	16	<=0.12	<=0.015	1	4	NA	NA	NA	Chromosomal AmpC	NA
15110652	2015	DTU	Denmark	Denmark	Livestock	Cattle	Faeces	NA	1	DTU	NA	Microdilution	Microdilution	>64	>4	<=0.5	<=0.03	<=4	<=0.015	<=2	<=1	1	<=0.25	<=8	<=8	8	<=0.25	2	1	<=0.06	<=0.12	<=0.03	2	<=0.12	<=0.015	8	<=0.25	blaCTX-M-14	NA	NA	NA	NA
15111153	2015	DTU	Denmark	Denmark	Livestock	Pork	Meat	NA	1	DTU	NA	Microdilution	Microdilution	>64	>4	1	<=0.03	<=4	<=0.015	>64	<=1	<=0.5	>32	>1024	128	4	<=0.25	2	4	<=0.06	<=0.12	<=0.03	8	<=0.12	<=0.015	32	1	blaCTX-M-1	NA	NA	NA	NA
15114811	2015	DTU	Denmark	Denmark	Livestock	Pigs	Faeces	NA	1	DTU	NA	Microdilution	Microdilution	64	32	1	<=0.03	4	<=0.015	2	1	<=0.5	32	1024	8	8	<=0.25	8	8	<=0.06	<=0.12	<=0.03	8	<=0.12	<=0.015	32	1	blaCTX-M-1	NA	NA	NA	NA
15116656	2015	DTU	Denmark	Denmark	Livestock	Pigs	Faeces	NA	1	DTU	NA	Microdilution	Microdilution	64	4	8	<=0.03	4	<=0.015	2	1	1	32	1024	16	64	<=0.25	64	<=0.06	1	8	<=0.03	8	<=0.12	<=0.015	2	16	NA	NA	NA	Chromosomal AmpC	NA
15116657	2015	DTU	Denmark	Denmark	Livestock	Pigs	Faeces	NA	1	DTU	NA	Microdilution	Microdilution	>64	>4	1	<=0.03	<=4	<=0.015	<=2	<=1	<=0.5	>32	>1024	<=8	4	<=0.25	4	4	<=0.06	<=0.12	<=0.03	8	<=0.12	<=0.015	16	1	blaCTX-M-1	NA	NA	NA	NA
15116853	2015	DTU	Denmark	Denmark	Livestock	Cattle	Faeces	NA	1	DTU	NA	Microdilution	Microdilution	>64	0	2	<=0.03	<=4	<=0.015	<=2	<=1	<=0.5	<=0.25	<=8	<=8	4	<=0.25	16	<=0.06	<=0.06	1	<=0.03	4	<=0.12	<=0.015	1	2	NA	NA	NA	Chromosomal AmpC	NA
15116854	2015	DTU	Denmark	Denmark	Livestock	Cattle	Faeces	NA	1	DTU	NA	Microdilution	Microdilution	>64	1	2	<=0.03	<=4	<=0.015	<=2	<=1	<=0.5	<=0.25	<=8	<=8	4	<=0.25	16	<=0.06	<=0.06	2	<=0.03	4	<=0.12	<=0.015	1	2	NA	NA	NA	Chromosomal AmpC	NA
15122578	2015	DTU	Denmark	Denmark	Livestock	Beef	Meat	NA	1	DTU	NA	Microdilution	Microdilution	>64	>4	2	<=0.03	<=4	<=0.015	<=2	<=1	1	<=0.25	<=8	<=8	4	<=0.25	4	16	<=0.06	<=0.12	<=0.03	8	<=0.12	<=0.015	64	2	blaCTX-M-14	NA	NA	NA	NA
16003091	2016	DTU	Denmark	Denmark	Livestock	Broiler meat	Meat	NA	1	DTU	NA	Microdilution	Microdilution	>64	>4	>8	<=0.03	128	<=0.015	<=2	<=1	<=0.5	<=0.25	>1024	>128	4	<=0.25	>64	<=0.06	8	4	<=0.03	4	<=0.12	<=0.015	16	8	NA	NA	NA	blaCMY-2	NA
16003146	2016	DTU	Denmark	Denmark	Livestock	Broiler meat	Meat	NA	1	DTU	NA	Microdilution	Microdilution	>64	>4	2	<=0.03	<=4	<=0.015	<=2	<=1	<=0.5	<=0.25	>1024	<=8	4	<=0.25	8	8	<=0.06	<=0.12	<=0.03	8	<=0.12	<=0.015	32	1	blaCTX-M-1	NA	NA	NA	NA
16004601	2016	DTU	Denmark	Poland	Livestock	Broiler meat	Meat	NA	1	DTU	NA	Microdilution	Microdilution	>64	>4	<=0.5	<=0.03	>128	8	<=2	<=1	>32	<=0.25	<=8	>128	8	<=0.25	8	4	<=0.06	<=0.12	<=0.03	8	<=0.12	<=0.015	64	1	blaCTX-M-14b	NA	NA	NA	NA
16004613	2016	DTU	Denmark	Denmark	Livestock	Broiler meat	Meat	NA	1	DTU	NA	Microdilution	Microdilution	>64	>4	>8	<=0.03	<=4	<=0.015	64	<=1	1	<=0.25	16	<=8	4	<=0.25	4	2	<=0.06	<=0.12	<=0.03	8	<=0.12	<=0.015	8	8	NA	blaTEM-52B	NA	NA	NA
16004978	2016	DTU	Denmark	France	Livestock	Broiler meat	Meat	NA	1	DTU	NA	Microdilution	Microdilution	>64	>4	1	<=0.03	>128	8	64	<=1	1	<=0.25	<=8	<=8	8	<=0.25	2	4	<=0.06	<=0.12	<=0.03	4	<=0.12	<=0.015	32	1	blaCTX-M-1	NA	NA	NA	NA
16004979	2016	DTU	Denmark	Germany	Livestock	Broiler meat	Meat	NA	1	DTU	NA	Microdilution	Microdilution	>64	>4	4	<=0.03	<=4	<=0.015	<=2	<=1	<=0.5	<=0.25	<=8	<=8	4	<=0.25	4	<=0.06	<=0.06	<=0.12	<=0.03	4	<=0.12	<=0.015	8	4	NA	blaTEM-52B	NA	NA	NA
16005224	2016	DTU	Denmark	France	Livestock	Broiler meat	Meat	NA	1	DTU	NA	Microdilution	Microdilution	>64	>4	<=0.5	<=0.03	<=4	<=0.015	<=2	<=1	1	>32	>1024	<=8	4	<=0.25	4	4	<=0.06	<=0.12	<=0.03	4	<=0.12	<=0.015	32	<=0.25	blaCTX-M-1	NA	NA	NA	NA
16009076	2016	DTU	Denmark	Denmark	Livestock	Broiler meat	Meat	NA	1	DTU	NA	Microdilution	Microdilution	>64	4	8	<=0.03	<=4	<=0.015	<=2	<=1	<=0.5	<=0.25	<=8	<=8	4	<=0.25	64	<=0.06	8	8	<=0.03	8	<=0.12	<=0.015	8	8	NA	NA	NA	blaCMY-2	NA
16009215	2016	DTU	Denmark	Germany	Livestock	Broiler meat	Meat	NA	1	DTU	NA	Microdilution	Microdilution	>64	>4	>8	<=0.03	>128	<=0.015	<=2	<=1	<=0.5	<=0.25	<=8	<=8	4	<=0.25	>64	<=0.06	16	8	<=0.03	8	<=0.12	<=0.015	8	16	NA	NA	NA	blaCMY-2	NA
16009246	2016	DTU	Denmark	Denmark	Livestock	Broiler meat	Meat	NA	1	DTU	NA	Microdilution	Microdilution	>64	>4	1	<=0.03	<=4	<=0.015	<=2	<=1	1	>32	>1024	<=8	4	<=0.25	4	16	<=0.06	<=0.12	<=0.03	4	<=0.12	<=0.015	64	1	NA	NA	NA	Chromosomal AmpC	NA
16009280	2016	DTU	Denmark	Germany	Livestock	Broiler meat	Meat	NA	1	DTU	NA	Microdilution	Microdilution	>64	>4	>8	<=0.03	128	<=0.015	<=2	<=1	<=0.5	<=0.25	<=8	<=8	4	<=0.25	>64	1	8	32	<=0.03	8	<=0.12	<=0.015	16	16	NA	NA	NA	blaCMY-2	NA
16009361	2016	DTU	Denmark	Denmark	Livestock	Broiler meat	Meat	NA	1	DTU	NA	Microdilution	Microdilution	>64	4	8	<=0.03	<=4	<=0.015	<=2	<=1	<=0.5	<=0.25	<=8	<=8	<=2	<=0.25	64	<=0.06	2	4	<=0.03	16	<=0.12	<=0.015	4	8	NA	NA	NA	Chromosomal AmpC	NA
16009362	2016	DTU	Denmark	Denmark	Livestock	Broiler meat	Meat	NA	1	DTU	NA	Microdilution	Microdilution	>64	>4	4	<=0.03	<=4	<=0.015	<=2	<=1	1	>32	>1024	<=8	4	<=0.25	4	>32	<=0.06	<=0.12	<=0.03	16	<=0.12	<=0.015	>64	4	blaCTX-M-1	NA	NA	NA	NA
16009408	2016	DTU	Denmark	Germany	Livestock	Broiler meat	Meat	NA	1	DTU	NA	Microdilution	Microdilution	>64	>4	1	<=0.03	<=4	<=0.015	<=2	<=1	1	<=0.25	>1024	<=8	<=2	<=0.25	8	8	<=0.06	<=0.12	<=0.03	8	<=0.12	<=0.015	32	4	blaCTX-M-1	NA	NA	NA	NA
16009415	2016	DTU	Denmark	France	Livestock	Broiler meat	Meat	NA	1	DTU	NA	Microdilution	Microdilution	>64	>4	1	<=0.03	<=4	<=0.015	>64	<=1	1	<=0.25	>1024	<=8	8	<=0.25	4	8	<=0.06	<=0.12	<=0.03	8	<=0.12	<=0.015	64	2	blaCTX-M-1	NA	NA	NA	NA
16009664	2016	DTU	Denmark	France	Livestock	Broiler meat	Meat	NA	1	DTU	NA	Microdilution	Microdilution	>64	>4	2	<=0.03	<=4	<=0.015	64	<=1	<=0.5	<=0.25	>1024	<=8	4	<=0.25	4	8	<=0.06	<=0.12	<=0.03	8	<=0.12	<=0.015	32	2	blaCTX-M-1	NA	NA	NA	NA
16009678	2016	DTU	Denmark	France	Livestock	Broiler meat	Meat	NA	1	DTU	NA	Microdilution	Microdilution	>64	>4	1	<=0.03	<=4	<=0.015	>64	<=1	1	>32	>1024	<=8	4	<=0.25	4	8	<=0.06	<=0.12	<=0.03	8	<=0.12	<=0.015	32	1	blaCTX-M-1	NA	NA	NA	NA
16009908	2016	DTU	Denmark	Denmark	Livestock	Broiler meat	Meat	NA	1	DTU	NA	Microdilution	Microdilution	>64	>4	1	<=0.03	<=4	<=0.015	32	<=1	1	<=0.25	<=8	<=8	4	<=0.25	2	16	<=0.06	<=0.12	<=0.03	32	<=0.12	<=0.015	32	1	blaCTX-M-1	NA	NA	NA	NA
16009950	2016	DTU	Denmark	France	Livestock	Broiler meat	Meat	NA	1	DTU	NA	Microdilution	Microdilution	>64	4	>8	<=0.03	128	<=0.015	64	<=1	<=0.5	<=0.25	>1024	64	4	<=0.25	8	<=0.06	<=0.06	<=0.12	<=0.03	8	<=0.12	<=0.015	4	16	NA	NA	blaSHV-12	NA	NA
16010294	2016	DTU	Denmark	Denmark	Livestock	Broiler meat	Meat	NA	1	DTU	NA	Microdilution	Microdilution	>64	>4	1	<=0.03	<=4	<=0.015	64	<=1	<=0.5	<=0.25	>1024	<=8	<=2	<=0.25	8	4	<=0.06	<=0.12	<=0.03	4	<=0.12	<=0.015	16	1	blaCTX-M-1	NA	NA	NA	NA
16010678	2016	DTU	Denmark	Denmark	Livestock	Broiler_chickens	Faeces	NA	1	DTU	NA	Microdilution	Microdilution	>64	>4	1	<=0.03	<=4	<=0.015	<=2	<=1	<=0.5	<=0.25	<=8	<=8	4	<=0.25	4	4	<=0.06	<=0.12	<=0.03	8	<=0.12	<=0.015	32	2	blaCTX-M-1	NA	NA	NA	NA
16012052	2016	DTU	Denmark	Denmark	Livestock	Broiler_chickens	Faeces	NA	1	DTU	NA	Microdilution	Microdilution	>64	>4	8	<=0.03	8	<=0.015	<=2	<=1	<=0.5	<=0.25	<=8	<=8	4	<=0.25	8	2	<=0.06	<=0.12	<=0.03	8	<=0.12	<=0.015	8	16	NA	blaTEM-52C	NA	NA	NA
16018597	2016	DTU	Denmark	Denmark	Livestock	Broiler meat	Meat	NA	1	DTU	NA	Microdilution	Microdilution	>64	>4	4	<=0.03	<=4	<=0.015	<=2	<=1	1	<=0.25	<=8	<=8	8	<=0.25	4	1	<=0.06	<=0.12	<=0.03	4	<=0.12	<=0.015	4	4	NA	blaTEM-52B	NA	NA	NA
16018634	2016	DTU	Denmark	France	Livestock	Broiler meat	Meat	NA	1	DTU	NA	Microdilution	Microdilution	>64	>4	2	<=0.03	128	<=0.015	>64	<=1	1	>32	>1024	<=8	<=2	<=0.25	4	>32	<=0.06	<=0.12	<=0.03	16	<=0.12	<=0.015	>64	4	blaCTX-M-1	NA	NA	NA	NA
16018874	2016	DTU	Denmark	France	Livestock	Broiler meat	Meat	NA	1	DTU	NA	Microdilution	Microdilution	>64	>4	1	<=0.03	<=4	<=0.015	64	<=1	1	<=0.25	>1024	<=8	4	<=0.25	4	16	<=0.06	<=0.12	<=0.03	4	<=0.12	<=0.015	16	1	blaCTX-M-1	NA	NA	NA	NA
16019035	2016	DTU	Denmark	Denmark	Livestock	Broiler meat	Meat	NA	1	DTU	NA	Microdilution	Microdilution	64	4	4	<=0.03	<=4	<=0.015	32	<=1	<=0.5	>32	>1024	<=8	4	<=0.25	64	<=0.06	4	2	<=0.03	2	<=0.12	<=0.015	4	4	NA	NA	NA	blaCMY-2	NA
16019085	2016	DTU	Denmark	France	Livestock	Broiler meat	Meat	NA	1	DTU	NA	Microdilution	Microdilution	>64	>4	2	<=0.03	<=4	<=0.015	64	<=1	1	>32	<=8	<=8	4	<=0.25	8	32	<=0.06	<=0.12	<=0.03	16	<=0.12	<=0.015	64	2	blaCTX-M-1	NA	NA	NA	NA
16019702	2016	DTU	Denmark	France	Livestock	Broiler meat	Meat	NA	1	DTU	NA	Microdilution	Microdilution	>64	>4	2	<=0.03	128	<=0.015	>64	<=1	1	>32	>1024	<=8	4	<=0.25	4	16	<=0.06	<=0.12	<=0.03	8	<=0.12	<=0.015	64	2	blaCTX-M-1	NA	NA	NA	NA
16019704	2016	DTU	Denmark	France	Livestock	Broiler meat	Meat	NA	1	DTU	NA	Microdilution	Microdilution	>64	>4	<=0.5	<=0.03	<=4	<=0.015	64	<=1	<=0.5	<=0.25	>1024	<=8	4	<=0.25	4	8	<=0.06	<=0.12	<=0.03	4	<=0.12	<=0.015	16	1	blaCTX-M-1	NA	NA	NA	NA
16019726	2016	DTU	Denmark	Denmark	Livestock	Broiler meat	Meat	NA	1	DTU	NA	Microdilution	Microdilution	>64	>4	8	<=0.03	>128	8	<=2	<=1	1	>32	>1024	<=8	8	<=0.25	64	<=0.06	4	1	<=0.03	8	<=0.12	<=0.015	4	8	NA	NA	NA	blaCMY-2	NA
16019802	2016	DTU	Denmark	Denmark	Livestock	Broiler meat	Meat	NA	1	DTU	NA	Microdilution	Microdilution	>64	>4	2	<=0.03	<=4	<=0.015	64	<=1	<=0.5	>32	>1024	<=8	4	<=0.25	4	8	<=0.06	<=0.12	<=0.03	8	<=0.12	<=0.015	32	2	blaCTX-M-1	NA	NA	NA	NA
16019805	2016	DTU	Denmark	Denmark	Livestock	Broiler meat	Meat	NA	1	DTU	NA	Microdilution	Microdilution	>64	>4	>4	<=0.03	<=4	<=0.015	64	<=1	<=0.5	<=0.25	<=8	<=8	4	<=0.25	4	1	<=0.06	<=0.12	<=0.03	8	<=0.12	<=0.015	4	16	NA	blaTEM-52B	NA	NA	NA
16019810	2016	DTU	Denmark	Denmark	Livestock	Broiler meat	Meat	NA	1	DTU	NA	Microdilution	Microdilution	>64	4	4	<=0.03	<=4	<=0.015	64	<=1	<=0.5	<=0.25	<=8	<=8	<=2	<=0.25	64	<=0.06	2	4	<=0.03	4	<=0.12	<=0.015	4	4	NA	NA	NA	blaCMY-2	NA
16020676	2016	DTU	Denmark	France	Livestock	Broiler meat	Meat	NA	1	DTU	NA	Microdilution	Microdilution	>64	>4	1	<=0.03	<=4	<=0.015	64	<=1	1	>32	>1024	<=8	4	<=0.25	2	8	<=0.06	<=0.12	<=0.03	8	<=0.12	<=0.015	16	1	blaCTX-M-1	NA	NA	NA	NA
16020678	2016	DTU	Denmark	France	Livestock	Broiler meat	Meat	NA	1	DTU	NA	Microdilution	Microdilution	>64	>4	1	<=0.03	<=4	<=0.015	64	<=1	1	>32	>1024	<=8	4	<=0.25	2	8	<=0.06	<=0.12	<=0.03	4	<=0.12	<=0.015	16	1	blaCTX-M-1	NA	NA	NA	NA
16020939	2016	DTU	Denmark	France	Livestock	Broiler meat	Meat	NA	1	DTU	NA	Microdilution	Microdilution	>64	2	>8	<=0.03	8	<=0.015	<=2	<=1	1	<=0.25	<=8	<=8	4	<=0.25	4	<=0.06	<=0.06	<=0.12	<=0.03	16	<=0.12	<=0.015	2	8	NA	NA	blaSHV-12	NA	NA
16021227	2016	DTU	Denmark	Denmark	Livestock	Broiler_chickens	Faeces	NA	1	DTU	NA	Microdilution	Microdilution	>64	1	1	<=0.03	64	<=0.015	>64	<=1	<=0.5	<=0.25	<=8	<=8	8	<=0.25	32	<=0.06	1	1	<=0.03	8	<=0.12	<=0.015	1	2	NA	NA	NA	Chromosomal AmpC	NA
16025596	2016	DTU	Denmark	Denmark	Livestock	Broiler_chickens	Faeces	NA	1	DTU	NA	Microdilution	Microdilution	>64	>4	2	<=0.03	<=4	<=0.015	<=2	<=1	<=0.5	>32	>1024	<=8	4	<=0.25	4	16	<=0.06	<=0.12	<=0.03	8	<=0.12	<=0.015	64	2	blaCTX-M-1	NA	NA	NA	NA
16025600	2016	DTU	Denmark	Denmark	Livestock	Broiler_chickens	Faeces	NA	1	DTU	NA	Microdilution	Microdilution	>64	4	>8	<=0.03	128	<=0.015	>64	<=1	<=0.5	<=0.25	>1024	64	4	<=0.25	8	<=0.06	<=0.06	<=0.12	<=0.03	8	<=0.12	<=0.015	4	16	NA	NA	blaSHV-12	NA	NA
16027194	2016	DTU	Denmark	Denmark	Livestock	Broiler meat	Meat	NA	1	DTU	NA	Microdilution	Microdilution	>64	>4	4	<=0.03	<=4	<=0.015	<=2	<=1	<=0.5	>32	>1024	<=8	4	<=0.25	4	32	<=0.06	<=0.12	<=0.03	8	<=0.12	<=0.015	>64	4	blaCTX-M-1	NA	NA	NA	NA
16027204	2016	DTU	Denmark	Denmark	Livestock	Broiler meat	Meat	NA	1	DTU	NA	Microdilution	Microdilution	>64	4	>8	<=0.03	128	<=0.015	64	<=1	<=0.5	<=0.25	>1024	32	4	<=0.25	8	<=0.06	<=0.06	<=0.12	<=0.03	8	<=0.12	<=0.015	2	16	NA	NA	blaSHV-12	NA	NA
16027227	2016	DTU	Denmark	Denmark	Livestock	Broiler meat	Meat	NA	1	DTU	NA	Microdilution	Microdilution	>64	>4	>8	<=0.03	<=4	<=0.015	64	<=1	<=0.5	<=0.25	<=8	<=8	4	<=0.25	4	2	<=0.06	<=0.12	<=0.03	4	<=0.12	<=0.015	8	16	NA	blaTEM-52B	NA	NA	NA
16027238	2016	DTU	Denmark	Denmark	Livestock	Broiler meat	Meat	NA	1	DTU	NA	Microdilution	Microdilution	>64	>4	2	<=0.03	<=4	<=0.015	<=2	<=1	<=0.5	>32	>1024	<=8	4	<=0.25	8	16	<=0.06	<=0.12	<=0.03	8	<=0.12	<=0.015	32	2	blaCTX-M-1	NA	NA	NA	NA
16027247	2016	DTU	Denmark	Denmark	Livestock	Broiler meat	Meat	NA	1	DTU	NA	Microdilution	Microdilution	>64	>4	8	<=0.03	<=4	<=0.015	64	<=1	<=0.5	<=0.25	<=8	<=8	4	<=0.25	4	1	<=0.06	<=0.12	<=0.03	8	<=0.12	<=0.015	4	16	NA	blaTEM-52B	NA	NA	NA
16027377	2016	DTU	Denmark	France	Livestock	Broiler meat	Meat	NA	1	DTU	NA	Microdilution	Microdilution	>64	>4	1	<=0.03	<=4	<=0.015	32	<=1	1	<=0.25	>1024	<=8	8	<=0.25	4	4	<=0.06	<=0.12	<=0.03	8	<=0.12	<=0.015	32	1	blaCTX-M-1	NA	NA	NA	NA
16027457	2016	DTU	Denmark	Denmark	Livestock	Broiler meat	Meat	NA	1	DTU	NA	Microdilution	Microdilution	>64	4	>8	<=0.03	>128	<=0.015	64	<=1	<=0.5	<=0.25	>1024	32	4	<=0.25	8	1	<=0.06	<=0.12	<=0.03	8	<=0.12	<=0.015	4	16	NA	NA	blaSHV-12	NA	NA
16027467	2016	DTU	Denmark	Denmark	Livestock	Broiler meat	Meat	NA	1	DTU	NA	Microdilution	Microdilution	>64	>4	>8	<=0.03	<=4	<=0.015	64	<=1	<=0.5	<=0.25	<=8	<=8	4	<=0.25	4	1	<=0.06	<=0.12	<=0.03	8	<=0.12	<=0.015	8	8	NA	blaTEM-52B	NA	NA	NA
16027655	2016	DTU	Denmark	Denmark	Livestock	Broiler_chickens	Faeces	NA	1	DTU	NA	Microdilution	Microdilution	>64	>4	8	<=0.03	<=4	<=0.015	64	<=1	<=0.5	>32	512	<=8	<=2	<=0.25	>64	<=0.06	8	8	<=0.03	4	<=0.12	<=0.015	8	8	NA	NA	NA	blaCMY-2	NA
16027658	2016	DTU	Denmark	Denmark	Livestock	Broiler_chickens	Faeces	NA	1	DTU	NA	Microdilution	Microdilution	>64	>4	1	<=0.03	<=4	<=0.015	<=2	<=1	<=0.5	<=0.25	<=8	<=8	4	<=0.25	4	8	<=0.06	<=0.12	<=0.03	8	<=0.12	<=0.015	32	2	blaCTX-M-1	NA	NA	NA	NA
16027661	2016	DTU	Denmark	Denmark	Livestock	Broiler_chickens	Faeces	NA	1	DTU	NA	Microdilution	Microdilution	>64	1	2	<=0.03	64	<=0.015	>64	<=1	<=0.5	<=0.25	<=8	<=8	8	<=0.25	64	<=0.06	1	1	<=0.03	16	<=0.12	<=0.015	1	2	NA	NA	NA	Chromosomal AmpC	NA
16027662	2016	DTU	Denmark	Denmark	Livestock	Broiler_chickens	Faeces	NA	1	DTU	NA	Microdilution	Microdilution	>64	>4	8	<=0.03	128	<=0.015	<=2	<=1	<=0.5	<=0.25	>1024	32	4	<=0.25	64	<=0.06	8	8	<=0.03	8	<=0.12	<=0.015	16	8	NA	NA	NA	blaCMY-2	NA
16028116	2016	DTU	Denmark	France	Livestock	Broiler meat	Meat	NA	1	DTU	NA	Microdilution	Microdilution	>64	>4	1	<=0.03	<=4	<=0.015	64	<=1	<=0.5	<=0.25	>1024	<=8	4	<=0.25	8	8	<=0.06	<=0.12	<=0.03	4	<=0.12	<=0.015	32	2	blaCTX-M-1	NA	NA	NA	NA
16028117	2016	DTU	Denmark	Germany	Livestock	Broiler meat	Meat	NA	1	DTU	NA	Microdilution	Microdilution	>64	>4	8	<=0.03	128	<=0.015	<=2	<=1	<=0.5	<=0.25	<=8	<=8	<=2	<=0.25	>64	<=0.06	8	8	<=0.03	8	<=0.12	<=0.015	8	16	NA	NA	NA	blaCMY-2	NA
16028159	2016	DTU	Denmark	Denmark	Livestock	Broiler meat	Meat	NA	1	DTU	NA	Microdilution	Microdilution	>64	>4	8	<=0.03	<=4	<=0.015	<=2	<=1	16	<=0.25	>1024	<=8	<=2	<=0.25	32	<=0.06	4	8	<=0.03	8	<=0.12	<=0.015	8	8	NA	NA	NA	blaCMY-2	NA
16028160	2016	DTU	Denmark	Germany	Livestock	Broiler meat	Meat	NA	1	DTU	NA	Microdilution	Microdilution	>64	>4	>8	<=0.03	128	<=0.015	<=2	<=1	<=0.5	<=0.25	<=8	<=8	<=2	<=0.25	>64	<=0.06	8	32	<=0.03	8	<=0.12	<=0.015	16	16	NA	NA	NA	blaCMY-2	NA
16028944	2016	DTU	Denmark	Denmark	Livestock	Broiler meat	Meat	NA	1	DTU	NA	Microdilution	Microdilution	>64	>4	2	<=0.03	<=4	<=0.015	>64	<=1	<=0.5	<=0.25	>1024	<=8	4	<=0.25	4	16	<=0.06	<=0.12	<=0.03	8	<=0.12	<=0.015	32	2	blaCTX-M-1	NA	NA	NA	NA
16029131	2016	DTU	Denmark	Denmark	Livestock	Broiler_chickens	Faeces	NA	1	DTU	NA	Microdilution	Microdilution	>64	2	2	<=0.03	128	<=0.015	>64	<=1	<=0.5	<=0.25	<=8	<=8	8	<=0.25	32	<=0.06	1	1	<=0.03	8	<=0.12	<=0.015	1	2	NA	NA	NA	blaCMY-2 , Chromosomal AmpC	NA
16029133	2016	DTU	Denmark	Denmark	Livestock	Broiler_chickens	Faeces	NA	1	DTU	NA	Microdilution	Microdilution	>64	>4	>8	<=0.03	<=4	<=0.015	32	<=1	1	>32	>1024	<=8	4	<=0.25	>64	<=0.06	8	8	<=0.03	16	<=0.12	<=0.015	16	8	NA	NA	NA	blaCMY-2	NA
16029684	2016	DTU	Denmark	Denmark	Livestock	Broiler_chickens	Faeces	NA	1	DTU	NA	Microdilution	Microdilution	>64	>4	2	<=0.03	<=4	<=0.015	64	<=1	<=0.5	>32	>1024	<=8	8	<=0.25	16	8	<=0.06	<=0.12	<=0.03	16	<=0.12	<=0.015	32	2	blaCTX-M-1	NA	NA	NA	NA
16029686	2016	DTU	Denmark	Denmark	Livestock	Broiler_chickens	Faeces	NA	1	DTU	NA	Microdilution	Microdilution	>64	2	1	<=0.03	<=4	<=0.015	<=2	<=1	<=0.5	<=0.25	<=8	<=8	4	<=0.25	8	<=0.06	<=0.06	<=0.12	<=0.03	8	<=0.12	<=0.015	2	2	NA	blaTEM-52B	NA	NA	NA
16029691	2016	DTU	Denmark	Denmark	Livestock	Broiler_chickens	Faeces	NA	1	DTU	NA	Microdilution	Microdilution	>64	1	1	<=0.03	64	<=0.015	>64	<=1	<=0.5	<=0.25	<=8	<=8	4	<=0.25	32	<=0.06	1	1	<=0.03	8	<=0.12	<=0.015	1	2	NA	NA	NA	Chromosomal AmpC	NA
16032964	2016	DTU	Denmark	Denmark	Livestock	Broiler meat	Meat	NA	1	DTU	NA	Microdilution	Microdilution	>64	>4	8	<=0.03	<=4	<=0.015	>64	<=1	<=0.5	<=0.25	>1024	<=8	4	<=0.25	64	<=0.06	8	8	<=0.03	8	<=0.12	<=0.015	8	8	NA	NA	NA	blaCMY-2	NA
16033322	2016	DTU	Denmark	France	Livestock	Broiler meat	Meat	NA	1	DTU	NA	Microdilution	Microdilution	>64	2	8	<=0.03	<=4	<=0.015	<=2	<=1	<=0.5	<=0.25	<=8	<=8	4	<=0.25	64	<=0.06	2	4	<=0.03	8	<=0.12	<=0.015	2	4	NA	NA	NA	Chromosomal AmpC	NA
16033518	2016	DTU	Denmark	Denmark	Livestock	Broiler meat	Meat	NA	1	DTU	NA	Microdilution	Microdilution	>64	>4	4	<=0.03	<=4	<=0.015	<=2	2	<=0.5	>32	>1024	<=8	4	<=0.25	4	>32	<=0.06	<=0.12	<=0.03	8	<=0.12	<=0.015	>64	4	blaCTX-M-1	NA	NA	NA	NA
16033521	2016	DTU	Denmark	Denmark	Livestock	Broiler meat	Meat	NA	1	DTU	NA	Microdilution	Microdilution	>64	>4	8	<=0.03	<=4	<=0.015	<=2	<=1	32	<=0.25	>1024	<=8	<=2	<=0.25	32	<=0.06	8	8	<=0.03	8	<=0.12	<=0.015	8	8	NA	NA	NA	blaCMY-2	NA
16034011	2016	DTU	Denmark	Denmark	Livestock	Broiler meat	Meat	NA	1	DTU	NA	Microdilution	Microdilution	>64	>4	4	<=0.03	<=4	<=0.015	<=2	<=1	<=0.5	>32	>1024	<=8	4	<=0.25	4	>32	<=0.06	<=0.12	<=0.03	8	<=0.12	<=0.015	>64	4	blaCTX-M-1	NA	NA	NA	NA
16034621	2016	DTU	Denmark	Denmark	Livestock	Broiler meat	Meat	NA	1	DTU	NA	Microdilution	Microdilution	>64	>4	2	<=0.03	<=4	<=0.015	<=2	<=1	<=0.5	>32	>1024	<=8	4	<=0.25	8	16	<=0.06	<=0.12	<=0.03	16	<=0.12	<=0.015	32	2	blaCTX-M-1	NA	NA	NA	NA
16034623	2016	DTU	Denmark	Denmark	Livestock	Broiler meat	Meat	NA	1	DTU	NA	Microdilution	Microdilution	>64	>4	4	<=0.03	<=4	<=0.015	<=2	<=1	1	>32	>1024	<=8	4	<=0.25	4	>32	<=0.06	<=0.12	<=0.03	16	<=0.12	<=0.015	>64	4	blaCTX-M-1	NA	NA	NA	NA
16034626	2016	DTU	Denmark	Denmark	Livestock	Broiler meat	Meat	NA	1	DTU	NA	Microdilution	Microdilution	>64	>4	8	<=0.03	<=4	<=0.015	64	<=1	<=0.5	<=0.25	>1024	<=8	4	<=0.25	64	<=0.06	8	8	<=0.03	8	<=0.12	<=0.015	8	8	NA	NA	NA	blaCMY-2	NA
16034781	2016	DTU	Denmark	Denmark	Livestock	Broiler meat	Meat	NA	1	DTU	NA	Microdilution	Microdilution	>64	>4	2	<=0.03	<=4	<=0.015	<=2	<=1	<=0.5	>32	>1024	<=8	4	<=0.25	4	16	<=0.06	<=0.12	<=0.03	8	<=0.12	<=0.015	32	1	blaCTX-M-1	NA	NA	NA	NA
16034782	2016	DTU	Denmark	Denmark	Livestock	Broiler meat	Meat	NA	1	DTU	NA	Microdilution	Microdilution	>64	>4	1	<=0.03	<=4	<=0.015	<=2	<=1	<=0.5	>32	>1024	<=8	4	<=0.25	4	16	<=0.06	<=0.12	<=0.03	8	<=0.12	<=0.015	64	2	blaCTX-M-1	NA	NA	NA	NA
16035021	2016	DTU	Denmark	Denmark	Livestock	Broiler_chickens	Faeces	NA	1	DTU	NA	Microdilution	Microdilution	>64	1	2	<=0.03	64	<=0.015	>64	<=1	<=0.5	<=0.25	<=8	<=8	<=2	<=0.25	32	<=0.06	<=0.06	<=0.12	<=0.03	8	<=0.12	<=0.015	1	1	NA	NA	NA	Chromosomal AmpC	NA
16036861	2016	DTU	Denmark	Denmark	Livestock	Broiler_chickens	Faeces	NA	1	DTU	NA	Microdilution	Microdilution	>64	>4	8	<=0.03	<=4	<=0.015	<=2	<=1	<=0.5	<=0.25	<=8	<=8	4	<=0.25	32	<=0.06	4	4	<=0.03	4	<=0.12	<=0.015	8	8	NA	NA	NA	blaCMY-2	NA
16036862	2016	DTU	Denmark	Denmark	Livestock	Broiler_chickens	Faeces	NA	1	DTU	NA	Microdilution	Microdilution	>64	>4	>8	<=0.03	<=4	<=0.015	<=2	<=1	<=0.5	<=0.25	<=8	<=8	4	<=0.25	64	<=0.06	8	8	<=0.03	8	<=0.12	<=0.015	8	8	NA	NA	NA	blaCMY-2	NA
16036882	2016	DTU	Denmark	Denmark	Livestock	Broiler_chickens	Faeces	NA	1	DTU	NA	Microdilution	Microdilution	>64	2	1	<=0.03	64	<=0.015	<=2	<=1	<=0.5	<=0.25	<=8	<=8	4	<=0.25	32	<=0.06	1	1	<=0.03	8	<=0.12	<=0.015	1	2	NA	NA	NA	Chromosomal AmpC	NA
16036883	2016	DTU	Denmark	Denmark	Livestock	Broiler_chickens	Faeces	NA	1	DTU	NA	Microdilution	Microdilution	>64	2	1	<=0.03	128	<=0.015	>64	<=1	<=0.5	<=0.25	<=8	<=8	8	<=0.25	64	<=0.06	1	1	<=0.03	8	<=0.12	<=0.015	1	2	NA	NA	NA	Chromosomal AmpC	NA
16036884	2016	DTU	Denmark	Denmark	Livestock	Broiler_chickens	Faeces	NA	1	DTU	NA	Microdilution	Microdilution	>64	1	2	<=0.03	64	<=0.015	>64	<=1	<=0.5	<=0.25	<=8	<=8	8	<=0.25	64	<=0.06	1	1	<=0.03	8	<=0.12	<=0.015	2	2	NA	NA	NA	Chromosomal AmpC	NA
16037235	2016	DTU	Denmark	Denmark	Livestock	Broiler_chickens	Faeces	NA	1	DTU	NA	Microdilution	Microdilution	>64	>4	4	<=0.03	<=4	<=0.015	>64	<=1	<=0.5	<=0.25	<=8	<=8	4	<=0.25	4	1	<=0.06	<=0.12	<=0.03	4	<=0.12	<=0.015	4	8	NA	blaTEM-52B	NA	NA	NA
16038972	2016	DTU	Denmark	Denmark	Livestock	Broiler meat	Meat	NA	1	DTU	NA	Microdilution	Microdilution	>64	>4	2	<=0.03	<=4	<=0.015	<=2	<=1	<=0.5	>32	>1024	<=8	4	<=0.25	4	32	<=0.06	<=0.12	<=0.03	8	<=0.12	<=0.015	64	2	blaCTX-M-1	NA	NA	NA	NA
16039247	2016	DTU	Denmark	Denmark	Livestock	Broiler meat	Meat	NA	1	DTU	NA	Microdilution	Microdilution	>64	>4	2	<=0.03	<=4	<=0.015	<=2	<=1	1	>32	>1024	<=8	4	<=0.25	8	16	<=0.06	<=0.12	<=0.03	8	<=0.12	<=0.015	32	1	blaCTX-M-1	NA	NA	NA	NA
16039255	2016	DTU	Denmark	Denmark	Livestock	Broiler meat	Meat	NA	1	DTU	NA	Microdilution	Microdilution	>64	>4	8	<=0.03	<=4	<=0.015	<=2	<=1	<=0.5	>32	>1024	<=8	4	<=0.25	4	>32	<=0.06	<=0.12	<=0.03	8	<=0.12	<=0.015	>64	4	blaCTX-M-1	NA	NA	NA	NA
16039256	2016	DTU	Denmark	France	Livestock	Broiler meat	Meat	NA	1	DTU	NA	Microdilution	Microdilution	>64	>4	8	<=0.03	<=4	<=0.015	64	<=1	32	<=0.25	>1024	<=8	4	<=0.25	64	<=0.06	8	8	<=0.03	8	<=0.12	<=0.015	8	8	NA	NA	NA	blaCMY-2	NA
16039314	2016	DTU	Denmark	Denmark	Livestock	Broiler meat	Meat	NA	1	DTU	NA	Microdilution	Microdilution	>64	>4	2	<=0.03	<=4	<=0.015	<=2	<=1	<=0.5	>32	>1024	<=8	4	<=0.25	4	16	<=0.06	<=0.12	<=0.03	8	<=0.12	<=0.015	32	1	blaCTX-M-1	NA	NA	NA	NA
16039410	2016	DTU	Denmark	France	Livestock	Broiler meat	Meat	NA	1	DTU	NA	Microdilution	Microdilution	>64	>4	2	<=0.03	<=4	<=0.015	64	<=1	<=0.5	>32	>1024	<=8	4	<=0.25	4	4	<=0.06	<=0.12	<=0.03	4	<=0.12	<=0.015	16	1	blaCTX-M-1	NA	NA	NA	NA
16039413	2016	DTU	Denmark	France	Livestock	Broiler meat	Meat	NA	1	DTU	NA	Microdilution	Microdilution	>64	>4	4	<=0.03	128	<=0.015	>64	<=1	<=0.5	>32	>1024	<=8	8	<=0.25	16	>32	<=0.06	<=0.12	<=0.03	16	<=0.12	<=0.015	>64	4	blaCTX-M-1	NA	NA	NA	NA
16039582	2016	DTU	Denmark	Denmark	Livestock	Broiler meat	Meat	NA	1	DTU	NA	Microdilution	Microdilution	>64	>4	1	<=0.03	<=4	<=0.015	<=2	<=1	<=0.5	>32	>1024	<=8	4	<=0.25	4	16	<=0.06	<=0.12	<=0.03	4	<=0.12	<=0.015	32	2	blaCTX-M-1	NA	NA	NA	NA
16040938	2016	DTU	Denmark	Germany	Livestock	Broiler meat	Meat	NA	1	DTU	NA	Microdilution	Microdilution	>64	>4	1	<=0.03	<=4	<=0.015	<=2	<=1	1	<=0.25	>1024	<=8	<=2	<=0.25	8	8	<=0.06	<=0.12	<=0.03	8	<=0.12	<=0.015	16	1	blaCTX-M-1	NA	NA	NA	NA
16041103	2016	DTU	Denmark	Denmark	Livestock	Broiler meat	Meat	NA	1	DTU	NA	Microdilution	Microdilution	>64	>4	1	<=0.03	<=4	<=0.015	64	<=1	<=0.5	<=0.25	>1024	<=8	4	<=0.25	8	16	<=0.06	<=0.12	<=0.03	4	<=0.12	<=0.015	32	2	blaCTX-M-1	NA	NA	NA	NA
16041182	2016	DTU	Denmark	Germany	Livestock	Broiler meat	Meat	NA	1	DTU	NA	Microdilution	Microdilution	>64	>4	1	<=0.03	>128	1	<=2	<=1	<=0.5	>32	>1024	<=8	4	<=0.25	4	4	<=0.06	<=0.12	<=0.03	8	<=0.12	<=0.015	16	2	blaCTX-M-1	NA	NA	NA	NA
16041211	2016	DTU	Denmark	Denmark	Livestock	Broiler meat	Meat	NA	1	DTU	NA	Microdilution	Microdilution	>64	>4	8	<=0.03	<=4	<=0.015	64	<=1	16	<=0.25	>1024	<=8	4	<=0.25	32	<=0.06	4	4	<=0.03	4	<=0.12	<=0.015	8	8	NA	NA	NA	blaCMY-2	NA
16041453	2016	DTU	Denmark	Denmark	Livestock	Broiler_chickens	Faeces	NA	1	DTU	NA	Microdilution	Microdilution	>64	>4	>8	<=0.03	<=4	<=0.015	64	<=1	<=0.5	<=0.25	<=8	<=8	4	<=0.25	4	1	<=0.06	<=0.12	<=0.03	4	<=0.12	<=0.015	4	8	NA	blaTEM-52B	NA	NA	NA
16041472	2016	DTU	Denmark	Denmark	Livestock	Broiler_chickens	Faeces	NA	1	DTU	NA	Microdilution	Microdilution	>64	>4	8	<=0.03	<=4	<=0.015	64	<=1	32	<=0.25	>1024	<=8	4	<=0.25	64	<=0.06	8	8	<=0.03	4	<=0.12	<=0.015	8	8	NA	NA	NA	blaCMY-2	NA
16041474	2016	DTU	Denmark	Denmark	Livestock	Broiler_chickens	Faeces	NA	1	DTU	NA	Microdilution	Microdilution	>64	>4	8	<=0.03	<=4	<=0.015	64	<=1	16	<=0.25	>1024	<=8	4	<=0.25	64	<=0.06	4	8	<=0.03	4	<=0.12	<=0.015	8	8	NA	NA	NA	blaCMY-2	NA
16046789	2016	DTU	Denmark	France	Livestock	Broiler meat	Meat	NA	1	DTU	NA	Microdilution	Microdilution	>64	>4	1	<=0.03	<=4	<=0.015	32	<=1	<=0.5	<=0.25	>1024	<=8	4	<=0.25	4	4	<=0.06	<=0.12	<=0.03	4	<=0.12	<=0.015	32	1	blaCTX-M-1	NA	NA	NA	NA
16046790	2016	DTU	Denmark	Denmark	Livestock	Broiler meat	Meat	NA	1	DTU	NA	Microdilution	Microdilution	>64	4	>8	<=0.03	64	<=0.015	64	<=1	<=0.5	<=0.25	>1024	32	4	<=0.25	8	<=0.06	<=0.06	<=0.12	<=0.03	4	<=0.12	<=0.015	4	16	NA	NA	blaSHV-12	NA	NA
16047574	2016	DTU	Denmark	Denmark	Livestock	Broiler meat	Meat	NA	1	DTU	NA	Microdilution	Microdilution	>64	4	>8	<=0.03	128	<=0.015	64	<=1	<=0.5	<=0.25	>1024	32	4	<=0.25	8	<=0.06	<=0.06	<=0.12	<=0.03	4	<=0.12	<=0.015	4	16	NA	NA	blaSHV-12	NA	NA
16047576	2016	DTU	Denmark	Germany	Livestock	Broiler meat	Meat	NA	1	DTU	NA	Microdilution	Microdilution	>64	4	4	<=0.03	>128	<=0.015	>64	<=1	1	<=0.25	>1024	<=8	16	<=0.25	8	1	<=0.06	<=0.12	<=0.03	8	<=0.12	<=0.015	2	4	NA	blaTEM-52B	NA	NA	NA
16048387	2016	DTU	Denmark	Denmark	Livestock	Broiler meat	Meat	NA	1	DTU	NA	Microdilution	Microdilution	>64	>4	8	<=0.03	>128	<=0.015	<=2	<=1	1	<=0.25	<=8	<=8	8	<=0.25	64	<=0.06	4	4	<=0.03	4	<=0.12	<=0.015	8	8	NA	NA	NA	blaCMY-2	NA
16048392	2016	DTU	Denmark	Germany	Livestock	Broiler meat	Meat	NA	1	DTU	NA	Microdilution	Microdilution	>64	>4	8	<=0.03	<=4	<=0.015	64	<=1	16	<=0.25	>1024	<=8	4	<=0.25	32	<=0.06	4	4	<=0.03	4	<=0.12	<=0.015	8	16	NA	NA	NA	blaCMY-2	NA
16048589	2016	DTU	Denmark	Denmark	Livestock	Broiler meat	Meat	NA	1	DTU	NA	Microdilution	Microdilution	>64	>4	8	<=0.03	<=4	<=0.015	32	<=1	16	<=0.25	>1024	<=8	4	<=0.25	32	<=0.06	4	8	<=0.03	4	<=0.12	<=0.015	8	8	NA	NA	NA	blaCMY-2	NA
16049134	2016	DTU	Denmark	Denmark	Livestock	Broiler meat	Meat	NA	1	DTU	NA	Microdilution	Microdilution	>64	>4	8	<=0.03	<=4	<=0.015	<=2	<=1	<=0.5	>32	>1024	<=8	8	<=0.25	4	>32	<=0.06	<=0.12	<=0.03	8	<=0.12	<=0.015	>64	4	blaCTX-M-1	NA	NA	NA	NA
16049218	2016	DTU	Denmark	Denmark	Livestock	Broiler meat	Meat	NA	1	DTU	NA	Microdilution	Microdilution	>64	>4	4	<=0.03	<=4	<=0.015	<=2	<=1	1	>32	>1024	<=8	4	<=0.25	4	>32	<=0.06	<=0.12	<=0.03	8	<=0.12	<=0.015	>64	4	blaCTX-M-1	NA	NA	NA	NA
16049438	2016	DTU	Denmark	Germany	Livestock	Broiler meat	Meat	NA	1	DTU	NA	Microdilution	Microdilution	>64	4	8	<=0.03	>128	2	<=2	<=1	1	>32	>1024	<=8	8	<=0.25	4	<=0.06	<=0.06	<=0.12	<=0.03	4	<=0.12	<=0.015	2	8	NA	NA	blaSHV-12	NA	NA
16049447	2016	DTU	Denmark	Denmark	Livestock	Broiler meat	Meat	NA	1	DTU	NA	Microdilution	Microdilution	>64	4	>8	<=0.03	<=4	<=0.015	<=2	<=1	<=0.5	<=0.25	<=8	<=8	<=2	<=0.25	>64	<=0.06	8	8	<=0.03	8	<=0.12	<=0.015	32	16	NA	NA	NA	blaCMY-2	NA
16053324	2016	DTU	Denmark	Denmark	Livestock	Broiler_chickens	Faeces	NA	1	DTU	NA	Microdilution	Microdilution	>64	>4	8	<=0.03	<=4	<=0.015	64	<=1	32	<=0.25	>1024	<=8	<=2	<=0.25	32	<=0.06	4	4	<=0.03	4	<=0.12	<=0.015	8	8	NA	NA	NA	blaCMY-2	NA
16053325	2016	DTU	Denmark	Denmark	Livestock	Broiler_chickens	Faeces	NA	1	DTU	NA	Microdilution	Microdilution	>64	>4	>8	<=0.03	<=4	<=0.015	>64	<=1	<=0.5	<=0.25	<=8	<=8	4	<=0.25	64	<=0.06	4	4	<=0.03	4	<=0.12	<=0.015	8	8	NA	NA	NA	blaCMY-2	NA
16056853	2016	DTU	Denmark	Denmark	Livestock	Broiler_chickens	Faeces	NA	1	DTU	NA	Microdilution	Microdilution	>64	>4	4	<=0.03	<=4	<=0.015	<=2	<=1	<=0.5	>32	>1024	<=8	<=2	<=0.25	4	>32	<=0.06	<=0.12	<=0.03	4	<=0.12	<=0.015	>64	4	blaCTX-M-1	NA	NA	NA	NA
16057220	2016	DTU	Denmark	France	Livestock	Broiler meat	Meat	NA	1	DTU	NA	Microdilution	Microdilution	>64	>4	1	<=0.03	<=4	<=0.015	64	<=1	<=0.5	<=0.25	>1024	<=8	8	<=0.25	4	4	<=0.06	<=0.12	<=0.03	4	<=0.12	<=0.015	16	1	blaCTX-M-1	NA	NA	NA	NA
16057230	2016	DTU	Denmark	France	Livestock	Broiler meat	Meat	NA	1	DTU	NA	Microdilution	Microdilution	>64	>4	2	<=0.03	>128	<=0.015	>64	<=1	1	<=0.25	>1024	<=8	8	<=0.25	4	8	<=0.06	<=0.12	<=0.03	16	<=0.12	<=0.015	32	1	blaCTX-M-1	NA	NA	NA	NA
16057231	2016	DTU	Denmark	France	Livestock	Broiler meat	Meat	NA	1	DTU	NA	Microdilution	Microdilution	>64	4	>8	<=0.03	<=4	<=0.015	64	<=1	>32	<=0.25	>1024	64	8	<=0.25	64	<=0.06	4	8	<=0.03	8	<=0.12	<=0.015	4	16	NA	NA	NA	blaCMY-2	NA
16058421	2016	DTU	Denmark	Denmark	Livestock	Broiler meat	Meat	NA	1	DTU	NA	Microdilution	Microdilution	>64	>4	8	<=0.03	<=4	<=0.015	64	<=1	32	<=0.25	>1024	<=8	<=2	<=0.25	64	<=0.06	8	8	<=0.03	4	<=0.12	<=0.015	8	8	NA	NA	NA	blaCMY-2	NA
16058443	2016	DTU	Denmark	Germany	Livestock	Broiler meat	Meat	NA	1	DTU	NA	Microdilution	Microdilution	>64	>4	8	<=0.03	<=4	<=0.015	64	<=1	16	<=0.25	>1024	<=8	4	<=0.25	32	<=0.06	4	4	<=0.03	4	<=0.12	<=0.015	8	8	NA	NA	NA	blaCMY-2	NA
16058507	2016	DTU	Denmark	Denmark	Livestock	Broiler meat	Meat	NA	1	DTU	NA	Microdilution	Microdilution	>64	>4	8	<=0.03	<=4	<=0.015	64	<=1	16	<=0.25	>1024	<=8	4	<=0.25	32	<=0.06	4	4	<=0.03	4	<=0.12	<=0.015	8	8	NA	NA	NA	blaCMY-2	NA
16061041	2016	DTU	Denmark	Denmark	Livestock	Broiler_chickens	Faeces	NA	1	DTU	NA	Microdilution	Microdilution	>64	>4	8	<=0.03	<=4	<=0.015	<=2	<=1	<=0.5	>32	>1024	<=8	4	<=0.25	64	<=0.06	8	8	<=0.03	8	<=0.12	<=0.015	8	8	NA	NA	NA	blaCMY-2	NA
16061042	2016	DTU	Denmark	Denmark	Livestock	Broiler_chickens	Faeces	NA	1	DTU	NA	Microdilution	Microdilution	>64	>4	1	<=0.03	<=4	<=0.015	<=2	<=1	<=1	<=0.25	16	<=8	8	<=0.25	4	4	<=0.06	<=0.12	<=0.03	8	<=0.12	<=0.015	16	<=0.25	blaCTX-M-1	NA	NA	NA	NA
16061291	2016	DTU	Denmark	Denmark	Livestock	Broiler_chickens	Faeces	NA	1	DTU	NA	Microdilution	Microdilution	>64	1	1	<=0.03	64	<=0.015	64	<=1	<=0.5	<=0.25	<=8	<=8	8	<=0.25	32	<=0.06	<=0.06	<=0.12	<=0.03	8	<=0.12	<=0.015	1	2	NA	NA	NA	Chromosomal AmpC	NA
16062095	2016	DTU	Denmark	Denmark	Livestock	Broiler_chickens	Faeces	NA	1	DTU	NA	Microdilution	Microdilution	>64	2	4	<=0.03	<=4	<=0.015	<=2	<=1	<=0.5	<=0.25	<=8	<=8	4	<=0.25	32	<=0.06	1	2	<=0.03	4	<=0.12	<=0.015	2	4	NA	NA	NA	Chromosomal AmpC	NA
16062097	2016	DTU	Denmark	Denmark	Livestock	Broiler_chickens	Faeces	NA	1	DTU	NA	Microdilution	Microdilution	>64	>4	1	<=0.03	<=4	<=0.015	32	<=1	<=0.5	<=0.25	>1024	<=8	4	<=0.25	2	4	<=0.06	<=0.12	<=0.03	4	<=0.12	<=0.015	32	1	blaCTX-M-1	NA	NA	NA	NA
16062099	2016	DTU	Denmark	Denmark	Livestock	Broiler_chickens	Faeces	NA	1	DTU	NA	Microdilution	Microdilution	>64	2	4	<=0.03	<=4	<=0.015	<=2	<=1	<=0.5	<=0.25	<=8	<=8	4	<=0.25	32	<=0.06	1	2	<=0.03	4	<=0.12	<=0.015	2	4	NA	NA	NA	Chromosomal AmpC	NA
16062144	2016	DTU	Denmark	Denmark	Livestock	Broiler_chickens	Faeces	NA	1	DTU	NA	Microdilution	Microdilution	64	>4	8	<=0.03	<=4	<=0.015	<=2	<=1	<=0.5	<=0.25	16	<=8	4	<=0.25	>64	<=0.06	4	4	<=0.03	4	<=0.12	<=0.015	8	4	NA	NA	NA	blaCMY-2	NA
16063593	2016	DTU	Denmark	Denmark	Livestock	Broiler meat	Meat	NA	1	DTU	NA	Microdilution	Microdilution	>64	2	4	<=0.03	<=4	<=0.015	<=2	<=1	<=0.5	<=0.25	<=8	<=8	8	<=0.25	32	<=0.06	1	2	<=0.03	4	<=0.12	<=0.015	2	4	NA	NA	NA	Chromosomal AmpC	NA
16063994	2016	DTU	Denmark	Denmark	Livestock	Broiler meat	Meat	NA	1	DTU	NA	Microdilution	Microdilution	>64	4	4	<=0.03	128	<=0.015	<=2	<=1	>32	<=0.25	>1024	<=8	8	<=0.25	32	<=0.06	4	4	<=0.03	4	<=0.12	<=0.015	4	4	NA	NA	NA	blaCMY-2	NA
16064004	2016	DTU	Denmark	Denmark	Livestock	Broiler meat	Meat	NA	1	DTU	NA	Microdilution	Microdilution	>64	>4	8	<=0.03	<=4	<=0.015	64	<=1	<=0.5	<=0.25	<=8	<=8	4	<=0.25	4	<=0.06	<=0.06	<=0.12	<=0.03	8	<=0.12	<=0.015	4	4	NA	blaTEM-52B	NA	NA	NA
17001419	2017	DTU	Denmark	Netherlands	Livestock	Beef	Meat	NA	1	DTU	NA	Microdilution	Microdilution	>64	>4	8	<=0.03	<=4	<=0.015	<=2	<=1	<=0.5	>32	>1024	<=8	8	<=0.25	4	2	<=0.06	<=0.12	<=0.03	4	<=0.12	<=0.015	8	8	NA	blaTEM-52C	NA	NA	NA
17005561	2017	DTU	Denmark	Spain	Livestock	Pork	Meat	NA	1	DTU	NA	Microdilution	Microdilution	>64	>4	1	<=0.03	<=4	<=0.015	64	<=1	1	<=0.25	>1024	<=8	4	<=0.25	4	16	<=0.06	<=0.12	<=0.03	8	<=0.12	<=0.015	64	2	blaCTX-M-1	NA	NA	NA	NA
17013672	2017	DTU	Denmark	Germany	Livestock	Beef	Meat	NA	1	DTU	NA	Microdilution	Microdilution	>64	>4	2	<=0.03	<=4	<=0.015	<=2	<=1	<=0.5	<=0.25	<=8	<=8	<=2	<=0.25	4	16	<=0.06	<=0.12	<=0.03	4	<=0.12	<=0.015	64	2	blaCTX-M-1	NA	NA	NA	NA
17021344	2017	DTU	Denmark	Netherlands	Livestock	Beef	Meat	NA	1	DTU	NA	Microdilution	Microdilution	>64	>4	2	<=0.03	<=4	<=0.015	64	<=1	<=0.5	>32	>1024	<=8	4	<=0.25	4	4	<=0.06	<=0.12	<=0.03	8	<=0.12	<=0.015	32	2	blaCTX-M-1	NA	NA	NA	NA
17027143	2017	DTU	Denmark	Denmark	Livestock	Beef	Meat	NA	1	DTU	NA	Microdilution	Microdilution	>64	>4	<=0.5	<=0.03	<=4	<=0.015	32	<=1	16	>32	>1024	<=8	4	<=0.25	2	2	<=0.06	<=0.12	<=0.03	4	<=0.12	<=0.015	16	<=0.25	blaCTX-M-1	NA	NA	NA	NA
17045211	2017	DTU	Denmark	Denmark	Livestock	Beef	Meat	NA	1	DTU	NA	Microdilution	Microdilution	>64	>4	4	<=0.03	<=4	<=0.015	<=2	<=1	<=0.5	<=0.25	<=8	<=8	8	<=0.25	4	4	<=0.06	<=0.12	<=0.03	4	<=0.12	<=0.015	32	2	blaCTX-M-15	NA	NA	NA	NA
17045228	2017	DTU	Denmark	Denmark	Livestock	Beef	Meat	NA	1	DTU	NA	Microdilution	Microdilution	>64	>4	<=0.5	<=0.03	<=4	<=0.015	<=2	<=1	1	<=0.25	<=8	<=8	8	<=0.25	4	1	<=0.06	<=0.12	<=0.03	4	<=0.12	<=0.015	16	<=0.25	blaCTX-M-14	NA	NA	NA	NA
17045563	2017	DTU	Denmark	Denmark	Livestock	Beef	Meat	NA	1	DTU	NA	Microdilution	Microdilution	>64	>4	<=0.5	<=0.03	<=4	<=0.015	<=2	<=1	1	<=0.25	<=8	<=8	16	<=0.25	2	1	<=0.06	<=0.12	<=0.03	4	<=0.12	<=0.015	8	<=0.25	blaCTX-M-14	NA	NA	NA	NA
17045566	2017	DTU	Denmark	Denmark	Livestock	Beef	Meat	NA	1	DTU	NA	Microdilution	Microdilution	>64	>4	8	<=0.03	<=4	<=0.015	64	<=1	<=0.5	<=0.25	>1024	128	8	<=0.25	8	32	<=0.06	<=0.12	<=0.03	16	<=0.12	<=0.015	>64	8	blaCTX-M-15	NA	NA	NA	NA
17053268	2017	DTU	Denmark	Denmark	Livestock	Beef	Meat	NA	1	DTU	NA	Microdilution	Microdilution	>64	>4	1	<=0.03	16	<=0.015	<=2	<=1	<=0.5	<=0.25	<=8	128	4	<=0.25	4	8	<=0.06	<=0.12	<=0.03	8	<=0.12	<=0.015	32	1	blaCTX-M-14	NA	NA	NA	NA
17053991	2017	DTU	Denmark	Germany	Livestock	Pork	Meat	NA	1	DTU	NA	Microdilution	Microdilution	>64	>4	1	<=0.03	<=4	<=0.015	>64	<=1	<=0.5	>32	>1024	<=8	8	<=0.25	4	8	<=0.06	<=0.12	<=0.03	8	<=0.12	<=0.015	32	1	blaCTX-M-1	NA	NA	NA	NA
17054155	2017	DTU	Denmark	Denmark	Livestock	Pork	Meat	NA	1	DTU	NA	Microdilution	Microdilution	>64	>4	1	<=0.03	<=4	<=0.015	<=2	<=1	<=0.5	>32	>1024	<=8	4	<=0.25	4	8	<=0.06	<=0.12	<=0.03	8	<=0.12	<=0.015	32	1	blaCTX-M-1	NA	NA	NA	NA
17054378	2017	DTU	Denmark	Denmark	Livestock	Pork	Meat	NA	1	DTU	NA	Microdilution	Microdilution	>64	>4	1	<=0.03	<=4	<=0.015	<=2	<=1	<=0.5	>32	>1024	<=8	4	<=0.25	4	8	<=0.06	<=0.12	<=0.03	4	<=0.12	<=0.015	32	1	blaCTX-M-1	NA	NA	NA	NA
17054380	2017	DTU	Denmark	Denmark	Livestock	Beef	Meat	NA	1	DTU	NA	Microdilution	Microdilution	>64	>4	2	<=0.03	<=4	<=0.015	>64	<=1	16	>32	>1024	<=8	4	<=0.25	8	>32	<=0.06	<=0.12	<=0.03	4	<=0.12	<=0.015	>64	2	blaCTX-M-1	NA	NA	NA	NA
17055794	2017	DTU	Denmark	Denmark	Livestock	Pork	Meat	NA	1	DTU	NA	Microdilution	Microdilution	>64	>4	2	<=0.03	<=4	<=0.015	4	<=1	<=0.5	>32	>1024	16	>64	<=0.25	8	16	<=0.06	<=0.12	<=0.03	16	<=0.12	<=0.015	64	4	blaCTX-M-1	NA	NA	NA	NA
17057257	2017	DTU	Denmark	Netherlands	Livestock	Pork	Meat	NA	1	DTU	NA	Microdilution	Microdilution	>64	>4	1	<=0.03	>128	>8	<=2	<=1	>32	<=0.25	<=8	128	4	<=0.25	4	8	<=0.06	<=0.12	<=0.03	8	<=0.12	<=0.015	64	1	blaCTX-M-14	NA	NA	NA	NA
17057259	2017	DTU	Denmark	Netherlands	Livestock	Pork	Meat	NA	1	DTU	NA	Microdilution	Microdilution	>64	2	4	<=0.03	<=4	<=0.015	32	<=1	<=0.5	<=0.25	<=8	<=8	4	<=0.25	32	<=0.06	1	4	<=0.03	4	<=0.12	<=0.015	2	4	NA	NA	NA	Chromosomal AmpC	NA
18000706	2018	DTU	Denmark	Denmark	Livestock	Broiler meat	Meat	NA	1	DTU	NA	Microdilution	Microdilution	>64	>4	>8	<=0.03	<=4	<=0.015	<=2	<=1	1	<=0.25	<=8	<=8	4	<=0.25	>64	<=0.06	8	8	<=0.03	8	<=0.12	<=0.015	8	16	NA	NA	NA	blaCMY-2	NA
18000710	2018	DTU	Denmark	Germany	Livestock	Broiler meat	Meat	NA	1	DTU	NA	Microdilution	Microdilution	>64	>4	>8	<=0.03	<=4	<=0.015	<=2	<=1	16	>32	>1024	<=8	<=2	<=0.25	>64	<=0.06	4	8	<=0.03	8	<=0.12	<=0.015	8	16	NA	NA	NA	blaCMY-2	NA
18001554	2018	DTU	Denmark	Denmark	Livestock	Broiler meat	Meat	NA	1	DTU	NA	Microdilution	Microdilution	>64	>4	>8	<=0.03	64	<=0.015	<=2	<=1	<=0.5	<=0.25	<=8	<=8	4	<=0.25	32	<=0.06	4	8	<=0.03	8	<=0.12	<=0.015	4	8	NA	NA	NA	blaCMY-2	NA
18001555	2018	DTU	Denmark	Denmark	Livestock	Broiler meat	Meat	NA	1	DTU	NA	Microdilution	Microdilution	>64	>4	>8	<=0.03	<=4	<=0.015	>64	<=1	1	>32	>1024	<=8	<=2	<=0.25	>64	<=0.06	8	8	<=0.03	8	<=0.12	<=0.015	8	8	NA	NA	NA	blaCMY-2	NA
18001670	2018	DTU	Denmark	Denmark	Livestock	Broiler_chickens	Faeces	NA	1	DTU	NA	Microdilution	Microdilution	>64	>4	1	<=0.03	<=4	<=0.015	<=2	<=1	<=0.5	<=0.25	>1024	<=8	<=2	<=0.25	4	4	<=0.06	<=0.12	<=0.03	8	<=0.12	<=0.015	>64	1	blaCTX-M-1	NA	NA	NA	NA
18001880	2018	DTU	Denmark	Germany	Livestock	Broiler meat	Meat	NA	1	DTU	NA	Microdilution	Microdilution	>64	>4	>8	<=0.03	>128	<=0.015	<=2	<=1	1	>32	>1024	64	4	<=0.25	4	1	<=0.06	<=0.12	<=0.03	8	<=0.12	<=0.015	4	32	NA	NA	blaSHV-12	NA	NA
18001947	2018	DTU	Denmark	Netherlands	Livestock	Broiler meat	Meat	NA	1	DTU	NA	Microdilution	Microdilution	>64	>4	1	<=0.03	>128	<=0.015	<=2	<=1	<=0.5	<=0.25	>1024	<=8	4	<=0.25	8	4	<=0.06	<=0.12	<=0.03	8	<=0.12	<=0.015	>64	1	blaCTX-M-1	NA	NA	NA	NA
18001955	2018	DTU	Denmark	Poland	Livestock	Broiler meat	Meat	NA	1	DTU	NA	Microdilution	Microdilution	>64	>4	1	<=0.03	>128	>8	<=2	<=1	>32	<=0.25	<=8	>128	16	<=0.25	8	4	<=0.06	<=0.12	<=0.03	8	<=0.12	<=0.015	>64	1	blaCTX-M-14b	NA	NA	NA	NA
18002383	2018	DTU	Denmark	Germany	Livestock	Broiler meat	Meat	NA	1	DTU	NA	Microdilution	Microdilution	>64	>4	>8	<=0.03	<=4	<=0.015	<=2	<=1	<=0.5	<=0.25	<=8	<=8	4	<=0.25	32	<=0.06	4	4	<=0.03	4	<=0.12	<=0.015	8	8	NA	NA	NA	blaCMY-2	NA
18004170	2018	DTU	Denmark	Denmark	Livestock	Broiler_chickens	Faeces	NA	1	DTU	NA	Microdilution	Microdilution	>64	>4	>8	<=0.03	<=4	<=0.015	>64	<=1	2	>32	>1024	<=8	<=2	<=0.25	>64	<=0.06	8	8	<=0.03	8	<=0.12	<=0.015	16	16	NA	NA	NA	blaCMY-2	NA
18004172	2018	DTU	Denmark	Denmark	Livestock	Broiler_chickens	Faeces	NA	1	DTU	NA	Microdilution	Microdilution	>64	>4	>8	<=0.03	<=4	<=0.015	>64	<=1	1	>32	>1024	<=8	4	<=0.25	>64	<=0.06	8	8	<=0.03	8	<=0.12	<=0.015	16	16	NA	NA	NA	blaCMY-2	NA
18004332	2018	DTU	Denmark	Germany	Livestock	Broiler meat	Meat	NA	1	DTU	NA	Microdilution	Microdilution	>64	>4	2	<=0.03	>128	1	<=2	<=1	1	<=0.25	<=8	<=8	4	<=0.25	8	<=0.06	<=0.06	<=0.12	<=0.03	8	<=0.12	<=0.015	4	2	NA	blaTEM-52B	NA	NA	NA
18005185	2018	DTU	Denmark	Netherlands	Livestock	Broiler meat	Meat	NA	1	DTU	NA	Microdilution	Microdilution	>64	>4	>8	<=0.03	>128	1	>64	<=1	<=0.5	>32	>1024	>128	16	<=0.25	4	2	<=0.06	<=0.12	<=0.03	4	<=0.12	<=0.015	8	8	NA	blaTEM-52C	NA	NA	NA
18005187	2018	DTU	Denmark	Netherlands	Livestock	Broiler meat	Meat	NA	1	DTU	NA	Microdilution	Microdilution	>64	>4	2	<=0.03	>128	>8	>64	<=1	<=0.5	>32	>1024	<=8	4	<=0.25	4	8	<=0.06	<=0.12	<=0.03	8	<=0.12	<=0.015	>64	2	blaCTX-M-1	NA	NA	NA	NA
18005806	2018	DTU	Denmark	France	Livestock	Broiler meat	Meat	NA	1	DTU	NA	Microdilution	Microdilution	>64	>4	1	<=0.03	>128	<=0.015	>64	<=1	1	<=0.25	>1024	<=8	8	<=0.25	4	8	<=0.06	<=0.12	<=0.03	8	<=0.12	<=0.015	>64	1	blaCTX-M-1	NA	NA	NA	NA
18006592	2018	DTU	Denmark	Netherlands	Livestock	Broiler meat	Meat	NA	1	DTU	NA	Microdilution	Microdilution	>64	>4	1	<=0.03	>128	<=0.015	>64	<=1	<=0.5	>32	>1024	<=8	4	<=0.25	8	4	<=0.06	<=0.12	<=0.03	8	<=0.12	<=0.015	>64	1	blaCTX-M-1	NA	NA	NA	NA
18006891	2018	DTU	Denmark	Germany	Livestock	Broiler meat	Meat	NA	1	DTU	NA	Microdilution	Microdilution	>64	>4	>8	<=0.03	<=4	<=0.015	<=2	<=1	<=0.5	<=0.25	<=8	<=8	<=2	<=0.25	32	<=0.06	4	8	<=0.03	8	<=0.12	<=0.015	8	8	NA	NA	NA	blaCMY-2	NA
18007131	2018	DTU	Denmark	Denmark	Livestock	Broiler_chickens	Faeces	NA	1	DTU	NA	Microdilution	Microdilution	>64	2	2	<=0.03	64	<=0.015	<=2	<=1	1	<=0.25	<=8	<=8	8	<=0.25	32	<=0.06	1	1	<=0.03	8	<=0.12	<=0.015	2	2	NA	NA	NA	Chromosomal AmpC	NA
18007136	2018	DTU	Denmark	Denmark	Livestock	Broiler_chickens	Faeces	NA	1	DTU	NA	Microdilution	Microdilution	>64	>4	1	<=0.03	<=4	<=0.015	32	<=1	2	<=0.25	>1024	<=8	4	<=0.25	4	16	<=0.06	<=0.12	<=0.03	4	<=0.12	<=0.015	>64	1	blaCTX-M-1	NA	NA	NA	NA
18008063	2018	DTU	Denmark	Denmark	Livestock	Broiler meat	Meat	NA	1	DTU	NA	Microdilution	Microdilution	>64	>4	>8	<=0.03	>128	<=0.015	<=2	<=1	<=0.5	<=0.25	<=8	<=8	4	<=0.25	32	<=0.06	4	4	<=0.03	4	<=0.12	<=0.015	8	4	NA	NA	NA	blaCMY-2	NA
18008142	2018	DTU	Denmark	Denmark	Livestock	Broiler meat	Meat	NA	1	DTU	NA	Microdilution	Microdilution	>64	>4	>8	<=0.03	<=4	<=0.015	<=2	<=1	<=0.5	>32	>1024	<=8	4	<=0.25	>64	<=0.06	16	16	<=0.03	16	<=0.12	<=0.015	16	32	NA	NA	NA	blaCMY-2	NA
18008145	2018	DTU	Denmark	Germany	Livestock	Broiler meat	Meat	NA	1	DTU	NA	Microdilution	Microdilution	>64	>4	4	<=0.03	>128	<=0.015	<=2	<=1	<=0.5	<=0.25	<=8	<=8	4	<=0.25	32	<=0.06	2	4	<=0.03	8	<=0.12	<=0.015	8	4	NA	NA	NA	blaCMY-2	NA
18008756	2018	DTU	Denmark	Germany	Livestock	Broiler meat	Meat	NA	1	DTU	NA	Microdilution	Microdilution	>64	2	2	<=0.03	>128	4	<=2	<=1	<=0.5	<=0.25	<=8	<=8	<=2	<=0.25	8	<=0.06	<=0.06	<=0.12	<=0.03	4	<=0.12	<=0.015	2	2	NA	blaTEM-52B	NA	NA	NA
18008757	2018	DTU	Denmark	Denmark	Livestock	Broiler meat	Meat	NA	1	DTU	NA	Microdilution	Microdilution	>64	>4	>8	<=0.03	<=4	<=0.015	<=2	<=1	<=0.5	<=0.25	>1024	<=8	<=2	<=0.25	>64	<=0.06	8	8	<=0.03	8	<=0.12	<=0.015	8	16	NA	NA	NA	blaCMY-2	NA
18008758	2018	DTU	Denmark	Denmark	Livestock	Broiler meat	Meat	NA	1	DTU	NA	Microdilution	Microdilution	>64	>4	1	<=0.03	>128	>8	<=2	<=1	<=0.5	<=0.25	>1024	<=8	4	<=0.25	4	8	<=0.06	<=0.12	<=0.03	4	<=0.12	<=0.015	>64	1	blaCTX-M-1	NA	NA	NA	NA
18009078	2018	DTU	Denmark	Denmark	Livestock	Broiler_chickens	Faeces	NA	1	DTU	NA	Microdilution	Microdilution	>64	>4	>8	<=0.03	<=4	<=0.015	<=2	<=1	<=0.5	<=0.25	<=8	<=8	8	<=0.25	>64	<=0.06	8	8	<=0.03	8	<=0.12	<=0.015	8	16	NA	NA	NA	blaCMY-2	NA
18009079	2018	DTU	Denmark	Denmark	Livestock	Broiler_chickens	Faeces	NA	1	DTU	NA	Microdilution	Microdilution	>64	>4	>8	<=0.03	<=4	<=0.015	<=2	<=1	2	<=0.25	<=8	<=8	4	<=0.25	>64	<=0.06	8	8	<=0.03	8	<=0.12	<=0.015	8	16	NA	NA	NA	blaCMY-2	NA
18009377	2018	DTU	Denmark	France	Livestock	Broiler meat	Meat	NA	1	DTU	NA	Microdilution	Microdilution	>64	>4	2	<=0.03	>128	<=0.015	>64	<=1	<=0.5	<=0.25	>1024	<=8	4	<=0.25	4	8	<=0.06	<=0.12	<=0.03	8	<=0.12	<=0.015	>64	2	blaCTX-M-1	NA	NA	NA	NA
18009386	2018	DTU	Denmark	Netherlands	Livestock	Broiler meat	Meat	NA	1	DTU	NA	Microdilution	Microdilution	>64	>4	4	<=0.03	>128	>8	>64	<=1	<=0.5	>32	>1024	>128	4	<=0.25	32	<=0.06	2	2	<=0.03	4	<=0.12	<=0.015	4	4	NA	NA	NA	blaCMY-2	NA
18010476	2018	DTU	Denmark	France	Livestock	Broiler meat	Meat	NA	1	DTU	NA	Microdilution	Microdilution	>64	>4	>8	<=0.03	>128	<=0.015	>64	<=1	<=0.5	<=0.25	>1024	<=8	4	<=0.25	8	<=0.06	<=0.06	<=0.12	<=0.03	8	<=0.12	<=0.015	8	8	NA	NA	blaSHV-12	NA	NA
18010610	2018	DTU	Denmark	Denmark	Livestock	Broiler meat	Meat	NA	1	DTU	NA	Microdilution	Microdilution	>64	>4	>8	<=0.03	<=4	<=0.015	<=2	<=1	1	<=0.25	<=8	<=8	8	<=0.25	>64	<=0.06	8	8	<=0.03	8	<=0.12	<=0.015	8	16	NA	NA	NA	blaCMY-2	NA
18010631	2018	DTU	Denmark	Denmark	Livestock	Broiler meat	Meat	NA	1	DTU	NA	Microdilution	Microdilution	>64	>4	>8	<=0.03	<=4	<=0.015	<=2	<=1	<=0.5	<=0.25	<=8	<=8	8	<=0.25	>64	<=0.06	8	8	<=0.03	8	<=0.12	<=0.015	8	16	NA	NA	NA	blaCMY-2	NA
18011071	2018	DTU	Denmark	Denmark	Livestock	Broiler_chickens	Faeces	NA	1	DTU	NA	Microdilution	Microdilution	>64	>4	>8	<=0.03	<=4	<=0.015	<=2	<=1	<=0.5	<=0.25	<=8	<=8	4	<=0.25	32	<=0.06	4	8	<=0.03	8	<=0.12	<=0.015	8	4	NA	NA	NA	blaCMY-2	NA
18011112	2018	DTU	Denmark	Germany	Livestock	Broiler meat	Meat	NA	1	DTU	NA	Microdilution	Microdilution	>64	2	2	<=0.03	<=4	<=0.015	<=2	<=1	<=0.5	<=0.25	<=8	<=8	4	<=0.25	8	<=0.06	<=0.06	<=0.12	<=0.03	4	<=0.12	<=0.015	2	2	NA	blaTEM-52B	NA	NA	NA
18011161	2018	DTU	Denmark	France	Livestock	Broiler meat	Meat	NA	1	DTU	NA	Microdilution	Microdilution	>64	>4	1	<=0.03	>128	>8	>64	<=1	<=0.5	>32	>1024	>128	4	<=0.25	4	16	<=0.06	<=0.12	<=0.03	4	<=0.12	<=0.015	>64	1	blaCTX-M-1	NA	NA	NA	NA
18011598	2018	DTU	Denmark	Poland	Livestock	Broiler meat	Meat	NA	1	DTU	NA	Microdilution	Microdilution	>64	2	>8	<=0.03	32	<=0.015	<=2	<=1	<=0.5	>32	>1024	<=8	4	<=0.25	2	<=0.06	<=0.06	<=0.12	<=0.03	4	<=0.12	<=0.015	2	8	NA	NA	blaSHV-12	NA	NA
18011601	2018	DTU	Denmark	Netherlands	Livestock	Broiler meat	Meat	NA	1	DTU	NA	Microdilution	Microdilution	>64	>4	>8	<=0.03	>128	<=0.015	<=2	<=1	>32	>32	>1024	>128	<=2	<=0.25	8	1	<=0.06	<=0.12	<=0.03	4	<=0.12	<=0.015	16	16	NA	NA	blaSHV-12	NA	NA
18011603	2018	DTU	Denmark	Belgium	Livestock	Broiler meat	Meat	NA	1	DTU	NA	Microdilution	Microdilution	>64	>4	>8	<=0.03	>128	<=0.015	<=2	<=1	16	>32	>1024	>128	4	<=0.25	4	1	<=0.06	<=0.12	<=0.03	4	<=0.12	<=0.015	16	16	NA	NA	blaSHV-12	NA	NA
18012003	2018	DTU	Denmark	Denmark	Livestock	Broiler meat	Meat	NA	1	DTU	NA	Microdilution	Microdilution	>64	>4	1	<=0.03	<=4	<=0.015	<=2	<=1	<=0.5	<=0.25	>1024	<=8	4	<=0.25	4	8	<=0.06	<=0.12	<=0.03	8	<=0.12	<=0.015	>64	1	blaCTX-M-1	NA	NA	NA	NA
18015283	2018	DTU	Denmark	Germany	Livestock	Broiler meat	Meat	NA	1	DTU	NA	Microdilution	Microdilution	>64	>4	>8	<=0.03	>128	<=0.015	<=2	<=1	>32	<=0.25	>1024	<=8	4	<=0.25	32	<=0.06	4	4	<=0.03	8	<=0.12	<=0.015	4	8	NA	NA	NA	blaCMY-2	NA
18015284	2018	DTU	Denmark	Denmark	Livestock	Broiler meat	Meat	NA	1	DTU	NA	Microdilution	Microdilution	>64	>4	>8	<=0.03	>128	>8	>64	<=1	1	>32	>1024	<=8	8	<=0.25	8	1	<=0.06	<=0.12	<=0.03	8	<=0.12	<=0.015	8	64	NA	NA	blaSHV-12	NA	NA
18015651	2018	DTU	Denmark	Denmark	Livestock	Broiler meat	Meat	NA	1	DTU	NA	Microdilution	Microdilution	>64	>4	>8	<=0.03	<=4	<=0.015	<=2	<=1	1	<=0.25	<=8	<=8	4	<=0.25	>64	<=0.06	8	16	<=0.03	8	<=0.12	<=0.015	16	16	NA	NA	NA	blaCMY-2	NA
18015657	2018	DTU	Denmark	Denmark	Livestock	Broiler meat	Meat	NA	1	DTU	NA	Microdilution	Microdilution	>64	>4	>8	<=0.03	<=4	<=0.015	<=2	<=1	1	<=0.25	<=8	<=8	4	<=0.25	32	<=0.06	4	4	<=0.03	4	<=0.12	<=0.015	8	8	NA	NA	NA	blaCMY-2	NA
18016942	2018	DTU	Denmark	Denmark	Livestock	Broiler_chickens	Faeces	NA	1	DTU	NA	Microdilution	Microdilution	>64	>4	>8	<=0.03	<=4	<=0.015	<=2	<=1	<=0.5	<=0.25	<=8	<=8	4	<=0.25	>64	<=0.06	8	8	<=0.03	4	<=0.12	<=0.015	8	16	NA	NA	NA	blaCMY-2	NA
18017247	2018	DTU	Denmark	Germany	Livestock	Broiler meat	Meat	NA	1	DTU	NA	Microdilution	Microdilution	>64	>4	2	<=0.03	>128	>8	<=2	<=1	<=0.5	<=0.25	<=8	<=8	4	<=0.25	4	8	<=0.06	<=0.12	<=0.03	4	<=0.12	<=0.015	>64	1	blaCTX-M-14	NA	NA	NA	NA
18018218	2018	DTU	Denmark	France	Livestock	Broiler meat	Meat	NA	1	DTU	NA	Microdilution	Microdilution	>64	>4	>8	<=0.03	>128	>8	<=2	<=1	1	>32	>1024	<=8	4	<=0.25	8	1	<=0.06	<=0.12	<=0.03	8	<=0.12	<=0.015	8	>128	NA	NA	blaSHV-12	NA	NA
18018660	2018	DTU	Denmark	France	Livestock	Broiler meat	Meat	NA	1	DTU	NA	Microdilution	Microdilution	>64	>4	<=0.5	<=0.03	>128	4	16	<=1	>32	<=0.25	>1024	<=8	<=2	<=0.25	4	4	<=0.06	<=0.12	<=0.03	4	<=0.12	<=0.015	32	<=0.25	blaCTX-M-14b	NA	NA	NA	NA
18018934	2018	DTU	Denmark	France	Livestock	Broiler meat	Meat	NA	1	DTU	NA	Microdilution	Microdilution	>64	>4	>8	<=0.03	>128	>8	>64	<=1	2	>32	>1024	<=8	4	<=0.25	8	<=0.06	<=0.06	<=0.12	<=0.03	8	<=0.12	<=0.015	4	32	NA	NA	blaSHV-12	NA	NA
18019336	2018	DTU	Denmark	Denmark	Livestock	Broiler meat	Meat	NA	1	DTU	NA	Microdilution	Microdilution	>64	2	2	<=0.03	64	<=0.015	>64	<=1	1	<=0.25	<=8	<=8	8	<=0.25	32	<=0.06	<=0.06	1	<=0.03	8	<=0.12	<=0.015	2	1	NA	NA	NA	Chromosomal AmpC	NA
18019344	2018	DTU	Denmark	Denmark	Livestock	Broiler meat	Meat	NA	1	DTU	NA	Microdilution	Microdilution	>64	>4	1	<=0.03	<=4	<=0.015	<=2	<=1	1	<=0.25	<=8	<=8	<=2	<=0.25	8	4	<=0.06	<=0.12	<=0.03	4	<=0.12	<=0.015	32	1	blaCTX-M-1	NA	NA	NA	NA
18019345	2018	DTU	Denmark	Denmark	Livestock	Broiler meat	Meat	NA	1	DTU	NA	Microdilution	Microdilution	>64	>4	1	<=0.03	<=4	<=0.015	<=2	<=1	1	<=0.25	<=8	<=8	4	<=0.25	8	8	<=0.06	<=0.12	<=0.03	4	<=0.12	<=0.015	32	1	blaCTX-M-1	NA	NA	NA	NA
18019346	2018	DTU	Denmark	Denmark	Livestock	Broiler meat	Meat	NA	1	DTU	NA	Microdilution	Microdilution	>64	>4	1	<=0.03	<=4	<=0.015	<=2	<=1	1	<=0.25	<=8	<=8	<=2	<=0.25	8	4	<=0.06	<=0.12	<=0.03	4	<=0.12	<=0.015	32	1	blaCTX-M-1	NA	NA	NA	NA
18019377	2018	DTU	Denmark	Germany	Livestock	Broiler meat	Meat	NA	1	DTU	NA	Microdilution	Microdilution	>64	>4	4	<=0.03	<=4	<=0.015	<=2	<=1	2	>32	<=8	<=8	4	<=0.25	16	1	<=0.06	<=0.12	<=0.03	8	<=0.12	<=0.015	4	4	NA	blaTEM-52B	NA	NA	NA
18019378	2018	DTU	Denmark	France	Livestock	Broiler meat	Meat	NA	1	DTU	NA	Microdilution	Microdilution	>64	>4	2	<=0.03	32	<=0.015	>64	<=1	1	<=0.25	>1024	<=8	8	<=0.25	4	>32	<=0.06	<=0.12	<=0.03	4	<=0.12	<=0.015	>64	2	blaCTX-M-1	NA	NA	NA	NA
18019804	2018	DTU	Denmark	Netherlands	Livestock	Broiler meat	Meat	NA	1	DTU	NA	Microdilution	Microdilution	>64	>4	>8	<=0.03	>128	1	>64	<=1	<=0.5	>32	>1024	>128	>64	<=0.25	8	1	<=0.06	<=0.12	<=0.03	8	<=0.12	<=0.015	16	8	NA	blaTEM-52C	NA	NA	NA
18021675	2018	DTU	Denmark	Denmark	Livestock	Broiler_chickens	Faeces	NA	1	DTU	NA	Microdilution	Microdilution	>64	>4	2	<=0.03	<=4	<=0.015	<=2	<=1	1	<=0.25	>1024	<=8	8	<=0.25	8	8	<=0.06	<=0.12	<=0.03	8	<=0.12	<=0.015	>64	2	blaCTX-M-1	NA	NA	NA	NA
18021676	2018	DTU	Denmark	Denmark	Livestock	Broiler_chickens	Faeces	NA	1	DTU	NA	Microdilution	Microdilution	>64	>4	>8	<=0.03	<=4	<=0.015	<=2	<=1	<=0.5	<=0.25	<=8	<=8	4	<=0.25	32	<=0.06	4	8	<=0.03	8	<=0.12	<=0.015	8	16	NA	NA	NA	blaCMY-2	NA
18022278	2018	DTU	Denmark	Germany	Livestock	Broiler meat	Meat	NA	1	DTU	NA	Microdilution	Microdilution	>64	>4	>8	<=0.03	>128	<=0.015	<=2	4	<=0.5	>32	>1024	16	16	<=0.25	16	2	<=0.06	<=0.12	<=0.03	16	<=0.12	<=0.015	16	16	NA	blaTEM-52C	NA	NA	NA
18022963	2018	DTU	Denmark	Denmark	Livestock	Broiler_chickens	Faeces	NA	1	DTU	NA	Microdilution	Microdilution	>64	>4	>8	<=0.03	<=4	<=0.015	<=2	<=1	<=0.5	<=0.25	<=8	<=8	4	<=0.25	32	<=0.06	4	8	<=0.03	8	<=0.12	<=0.015	8	16	NA	NA	NA	blaCMY-2	NA
18022967	2018	DTU	Denmark	Denmark	Livestock	Broiler_chickens	Faeces	NA	1	DTU	NA	Microdilution	Microdilution	>64	>4	>8	<=0.03	<=4	<=0.015	<=2	<=1	1	<=0.25	<=8	<=8	4	<=0.25	>64	<=0.06	8	8	<=0.03	4	<=0.12	<=0.015	8	16	NA	NA	NA	blaCMY-2	NA
18022970	2018	DTU	Denmark	Denmark	Livestock	Broiler_chickens	Faeces	NA	1	DTU	NA	Microdilution	Microdilution	>64	>4	>8	<=0.03	<=4	<=0.015	<=2	<=1	1	<=0.25	<=8	<=8	8	<=0.25	>64	<=0.06	8	8	<=0.03	4	<=0.12	<=0.015	16	16	NA	NA	NA	blaCMY-2	NA
18022971	2018	DTU	Denmark	Denmark	Livestock	Broiler_chickens	Faeces	NA	1	DTU	NA	Microdilution	Microdilution	>64	1	1	<=0.03	64	<=0.015	<=2	<=1	<=0.5	<=0.25	<=8	<=8	4	<=0.25	32	<=0.06	1	1	<=0.03	8	<=0.12	<=0.015	2	2	NA	NA	NA	Chromosomal AmpC	NA
18022983	2018	DTU	Denmark	Denmark	Livestock	Broiler_chickens	Faeces	NA	1	DTU	NA	Microdilution	Microdilution	>64	>4	>8	<=0.03	<=4	<=0.015	<=2	<=1	<=0.5	<=0.25	<=8	<=8	8	<=0.25	>64	<=0.06	8	8	<=0.03	8	<=0.12	<=0.015	8	8	NA	NA	NA	blaCMY-2	NA
18022984	2018	DTU	Denmark	Denmark	Livestock	Broiler_chickens	Faeces	NA	1	DTU	NA	Microdilution	Microdilution	>64	1	2	<=0.03	64	<=0.015	>64	<=1	<=0.5	<=0.25	<=8	<=8	8	<=0.25	32	<=0.06	<=0.06	1	<=0.03	8	<=0.12	<=0.015	1	2	NA	NA	NA	Chromosomal AmpC	NA
18022987	2018	DTU	Denmark	Denmark	Livestock	Broiler_chickens	Faeces	NA	1	DTU	NA	Microdilution	Microdilution	>64	>4	>8	<=0.03	<=4	<=0.015	<=2	<=1	<=0.5	<=0.25	<=8	<=8	8	<=0.25	>64	<=0.06	8	8	<=0.03	4	<=0.12	<=0.015	8	16	NA	NA	NA	blaCMY-2	NA
18022988	2018	DTU	Denmark	Denmark	Livestock	Broiler_chickens	Faeces	NA	1	DTU	NA	Microdilution	Microdilution	>64	>4	>8	<=0.03	<=4	<=0.015	<=2	<=1	1	<=0.25	<=8	<=8	8	<=0.25	>64	<=0.06	8	8	<=0.03	8	<=0.12	<=0.015	8	16	NA	NA	NA	blaCMY-2	NA
18022989	2018	DTU	Denmark	Denmark	Livestock	Broiler_chickens	Faeces	NA	1	DTU	NA	Microdilution	Microdilution	>64	2	1	<=0.03	64	<=0.015	>64	<=1	<=0.5	<=0.25	<=8	<=8	4	<=0.25	32	<=0.06	1	1	<=0.03	8	<=0.12	<=0.015	2	1	NA	NA	NA	Chromosomal AmpC	NA
18023021	2018	DTU	Denmark	Denmark	Livestock	Broiler_chickens	Faeces	NA	1	DTU	NA	Microdilution	Microdilution	>64	>4	>8	<=0.03	<=4	<=0.015	<=2	<=1	1	<=0.25	<=8	<=8	4	<=0.25	>64	<=0.06	4	8	<=0.03	8	<=0.12	<=0.015	8	16	NA	NA	NA	blaCMY-2	NA
18023080	2018	DTU	Denmark	Netherlands	Livestock	Broiler meat	Meat	NA	1	DTU	NA	Microdilution	Microdilution	>64	>4	>8	<=0.03	>128	<=0.015	>64	<=1	<=0.5	>32	>1024	64	8	<=0.25	8	2	<=0.06	<=0.12	<=0.03	4	<=0.12	<=0.015	8	64	NA	NA	blaSHV-12	NA	NA
18023350	2018	DTU	Denmark	France	Livestock	Broiler meat	Meat	NA	1	DTU	NA	Microdilution	Microdilution	>64	>4	2	<=0.03	64	<=0.015	>64	<=1	2	<=0.25	>1024	<=8	4	<=0.25	4	16	<=0.06	<=0.12	<=0.03	4	<=0.12	<=0.015	>64	2	blaCTX-M-1	NA	NA	NA	NA
18023377	2018	DTU	Denmark	France	Livestock	Broiler meat	Meat	NA	1	DTU	NA	Microdilution	Microdilution	>64	>4	2	<=0.03	<=4	<=0.015	>64	<=1	<=0.5	<=0.25	>1024	<=8	<=2	<=0.25	8	16	<=0.06	<=0.12	<=0.03	8	<=0.12	<=0.015	>64	2	blaCTX-M-1	NA	NA	NA	NA
18024932	2018	DTU	Denmark	Netherlands	Livestock	Broiler meat	Meat	NA	1	DTU	NA	Microdilution	Microdilution	>64	>4	2	<=0.03	>128	<=0.015	<=2	<=1	<=0.5	<=0.25	<=8	<=8	8	<=0.25	8	<=0.06	<=0.06	<=0.12	<=0.03	8	<=0.12	<=0.015	2	2	NA	blaTEM-52C	NA	NA	NA
18025022	2018	DTU	Denmark	Denmark	Livestock	Broiler_chickens	Faeces	NA	1	DTU	NA	Microdilution	Microdilution	>64	>4	>8	<=0.03	<=4	<=0.015	<=2	<=1	<=0.5	<=0.25	<=8	<=8	8	<=0.25	>64	<=0.06	8	8	<=0.03	8	<=0.12	<=0.015	8	16	NA	NA	NA	blaCMY-2	NA
18025924	2018	DTU	Denmark	Denmark	Livestock	Broiler_chickens	Faeces	NA	1	DTU	NA	Microdilution	Microdilution	>64	1	1	<=0.03	64	<=0.015	<=2	<=1	<=0.5	<=0.25	<=8	<=8	4	<=0.25	32	<=0.06	1	<=0.12	<=0.03	8	<=0.12	<=0.015	2	2	NA	NA	NA	Chromosomal AmpC	NA
18025979	2018	DTU	Denmark	Denmark	Livestock	Broiler_chickens	Faeces	NA	1	DTU	NA	Microdilution	Microdilution	>64	>4	>8	<=0.03	<=4	<=0.015	<=2	<=1	2	<=0.25	<=8	<=8	8	<=0.25	>64	<=0.06	8	8	<=0.03	8	<=0.12	<=0.015	8	16	NA	NA	NA	blaCMY-2	NA
18026583	2018	DTU	Denmark	Denmark	Livestock	Broiler_chickens	Faeces	NA	1	DTU	NA	Microdilution	Microdilution	>64	>4	>8	<=0.03	<=4	<=0.015	<=2	<=1	<=0.5	<=0.25	<=8	<=8	4	<=0.25	>64	<=0.06	4	4	<=0.03	8	<=0.12	<=0.015	8	8	NA	NA	NA	blaCMY-2	NA
18026595	2018	DTU	Denmark	Denmark	Livestock	Broiler_chickens	Faeces	NA	1	DTU	NA	Microdilution	Microdilution	>64	>4	>8	<=0.03	<=4	<=0.015	<=2	<=1	<=0.5	<=0.25	<=8	<=8	8	<=0.25	>64	<=0.06	4	8	<=0.03	8	<=0.12	<=0.015	8	8	NA	NA	NA	blaCMY-2	NA
18026601	2018	DTU	Denmark	Denmark	Livestock	Broiler_chickens	Faeces	NA	1	DTU	NA	Microdilution	Microdilution	>64	1	1	<=0.03	32	<=0.015	<=2	<=1	1	<=0.25	<=8	<=8	4	<=0.25	16	<=0.06	<=0.06	<=0.12	<=0.03	4	<=0.12	<=0.015	1	1	NA	NA	NA	Chromosomal AmpC	NA
18026613	2018	DTU	Denmark	Denmark	Livestock	Broiler_chickens	Faeces	NA	1	DTU	NA	Microdilution	Microdilution	>64	1	1	<=0.03	32	<=0.015	<=2	<=1	1	<=0.25	<=8	<=8	4	<=0.25	16	<=0.06	<=0.06	<=0.12	<=0.03	8	<=0.12	<=0.015	1	1	NA	NA	NA	Chromosomal AmpC	NA
18026633	2018	DTU	Denmark	Denmark	Livestock	Broiler_chickens	Faeces	NA	1	DTU	NA	Microdilution	Microdilution	>64	2	2	<=0.03	64	<=0.015	4	<=1	1	<=0.25	<=8	<=8	8	<=0.25	32	<=0.06	1	1	<=0.03	8	<=0.12	<=0.015	1	2	NA	NA	NA	Chromosomal AmpC	NA
18026636	2018	DTU	Denmark	Denmark	Livestock	Broiler_chickens	Faeces	NA	1	DTU	NA	Microdilution	Microdilution	>64	>4	>8	<=0.03	<=4	<=0.015	<=2	<=1	1	<=0.25	<=8	<=8	4	<=0.25	>64	<=0.06	8	8	<=0.03	8	<=0.12	<=0.015	8	16	NA	NA	NA	blaCMY-2	NA
18026640	2018	DTU	Denmark	Denmark	Livestock	Broiler_chickens	Faeces	NA	1	DTU	NA	Microdilution	Microdilution	>64	1	2	<=0.03	64	<=0.015	<=2	<=1	1	<=0.25	<=8	<=8	8	<=0.25	32	<=0.06	<=0.06	1	<=0.03	8	<=0.12	<=0.015	1	2	NA	NA	NA	Chromosomal AmpC	NA
18026947	2018	DTU	Denmark	France	Livestock	Broiler meat	Meat	NA	1	DTU	NA	Microdilution	Microdilution	>64	>4	2	<=0.03	<=4	<=0.015	>64	<=1	1	<=0.25	>1024	<=8	<=2	<=0.25	8	16	<=0.06	<=0.12	<=0.03	8	<=0.12	<=0.015	>64	2	blaCTX-M-1	NA	NA	NA	NA
18027352	2018	DTU	Denmark	Denmark	Livestock	Broiler meat	Meat	NA	1	DTU	NA	Microdilution	Microdilution	>64	>4	>8	<=0.03	<=4	<=0.015	<=2	<=1	<=0.5	<=0.25	<=8	<=8	4	<=0.25	>64	<=0.06	8	8	<=0.03	8	<=0.12	<=0.015	8	8	NA	NA	NA	blaCMY-2	NA
18027354	2018	DTU	Denmark	Netherlands	Livestock	Broiler meat	Meat	NA	1	DTU	NA	Microdilution	Microdilution	>64	>4	>8	<=0.03	<=4	<=0.015	>64	<=1	<=0.5	<=0.25	>1024	32	4	<=0.25	4	1	<=0.06	<=0.12	<=0.03	4	<=0.12	<=0.015	16	32	NA	NA	blaSHV-12	NA	NA
18027688	2018	DTU	Denmark	Denmark	Livestock	Broiler meat	Meat	NA	1	DTU	NA	Microdilution	Microdilution	>64	>4	>8	<=0.03	<=4	<=0.015	<=2	<=1	<=0.5	<=0.25	<=8	<=8	8	<=0.25	>64	<=0.06	8	8	<=0.03	8	<=0.12	<=0.015	8	16	NA	NA	NA	blaCMY-2	NA
18027707	2018	DTU	Denmark	Denmark	Livestock	Broiler_chickens	Faeces	NA	1	DTU	NA	Microdilution	Microdilution	>64	>4	>8	<=0.03	<=4	<=0.015	<=2	<=1	<=0.5	<=0.25	<=8	<=8	4	<=0.25	>64	<=0.06	4	8	<=0.03	8	<=0.12	<=0.015	16	16	NA	NA	NA	blaCMY-2	NA
18027709	2018	DTU	Denmark	Denmark	Livestock	Broiler_chickens	Faeces	NA	1	DTU	NA	Microdilution	Microdilution	>64	>4	2	<=0.03	<=4	<=0.015	>64	<=1	1	<=0.25	>1024	<=8	8	<=0.25	8	8	<=0.06	<=0.12	<=0.03	8	<=0.12	<=0.015	>64	1	blaCTX-M-1	NA	NA	NA	NA
18027764	2018	DTU	Denmark	Netherlands	Livestock	Broiler meat	Meat	NA	1	DTU	NA	Microdilution	Microdilution	>64	>4	<=0.5	<=0.03	>128	1	>64	<=1	<=0.5	>32	>1024	>128	4	<=0.25	2	4	<=0.06	<=0.12	<=0.03	4	<=0.12	<=0.015	>64	1	blaCTX-M-1	NA	NA	NA	NA
18027766	2018	DTU	Denmark	Latvia	Livestock	Broiler meat	Meat	NA	1	DTU	NA	Microdilution	Microdilution	>64	>4	2	<=0.03	<=4	<=0.015	>64	<=1	<=0.5	<=0.25	>1024	32	4	<=0.25	4	16	<=0.06	<=0.12	<=0.03	4	<=0.12	<=0.015	>64	1	blaCTX-M-1	NA	NA	NA	NA
18028231	2018	DTU	Denmark	Denmark	Livestock	Broiler meat	Meat	NA	1	DTU	NA	Microdilution	Microdilution	>64	>4	>8	<=0.03	<=4	<=0.015	<=2	<=1	<=0.5	<=0.25	<=8	<=8	4	<=0.25	>64	<=0.06	4	8	<=0.03	8	<=0.12	<=0.015	8	16	NA	NA	NA	blaCMY-2	NA
18028246	2018	DTU	Denmark	Germany	Livestock	Broiler meat	Meat	NA	1	DTU	NA	Microdilution	Microdilution	>64	>4	2	<=0.03	>128	4	<=2	<=1	1	<=0.25	<=8	<=8	4	<=0.25	8	<=0.06	<=0.06	<=0.12	<=0.03	8	<=0.12	<=0.015	4	2	NA	blaTEM-52B	NA	NA	NA
18028409	2018	DTU	Denmark	Denmark	Livestock	Broiler_chickens	Faeces	NA	1	DTU	NA	Microdilution	Microdilution	>64	>4	>8	<=0.03	<=4	<=0.015	<=2	<=1	1	<=0.25	>1024	<=8	4	<=0.25	32	<=0.06	4	8	<=0.03	4	<=0.12	<=0.015	8	8	NA	NA	NA	blaCMY-2	NA
18028411	2018	DTU	Denmark	Denmark	Livestock	Broiler_chickens	Faeces	NA	1	DTU	NA	Microdilution	Microdilution	>64	>4	>8	<=0.03	>128	>8	>64	<=1	1	>32	>1024	<=8	4	<=0.25	16	1	<=0.06	<=0.12	<=0.03	8	<=0.12	<=0.015	16	32	NA	NA	blaSHV-12	NA	NA
18028413	2018	DTU	Denmark	Denmark	Livestock	Broiler_chickens	Faeces	NA	1	DTU	NA	Microdilution	Microdilution	>64	>4	2	<=0.03	<=4	<=0.015	<=2	<=1	<=0.5	<=0.25	>1024	<=8	8	<=0.25	4	>32	<=0.06	<=0.12	<=0.03	4	<=0.12	<=0.015	>64	2	blaCTX-M-1	NA	NA	NA	NA
18028414	2018	DTU	Denmark	Denmark	Livestock	Broiler_chickens	Faeces	NA	1	DTU	NA	Microdilution	Microdilution	>64	>4	>8	<=0.03	<=4	<=0.015	<=2	<=1	<=0.5	<=0.25	<=8	<=8	8	<=0.25	>64	<=0.06	8	8	<=0.03	8	<=0.12	<=0.015	8	16	NA	NA	NA	blaCMY-2	NA
18028450	2018	DTU	Denmark	Denmark	Livestock	Broiler_chickens	Faeces	NA	1	DTU	NA	Microdilution	Microdilution	>64	>4	>8	<=0.03	<=4	<=0.015	<=2	<=1	<=0.5	<=0.25	<=8	<=8	8	<=0.25	>64	<=0.06	8	8	<=0.03	4	<=0.12	<=0.015	8	16	NA	NA	NA	blaCMY-2	NA
18028459	2018	DTU	Denmark	Denmark	Livestock	Broiler_chickens	Faeces	NA	1	DTU	NA	Microdilution	Microdilution	>64	>4	>8	<=0.03	<=4	<=0.015	<=2	<=1	<=0.5	<=0.25	<=8	<=8	4	<=0.25	>64	<=0.06	4	8	<=0.03	4	<=0.12	<=0.015	8	8	NA	NA	NA	blaCMY-2	NA
18028726	2018	DTU	Denmark	Denmark	Livestock	Broiler meat	Meat	NA	1	DTU	NA	Microdilution	Microdilution	>64	>4	>8	<=0.03	<=4	<=0.015	<=2	<=1	<=0.5	<=0.25	<=8	<=8	8	<=0.25	>64	<=0.06	8	16	<=0.03	16	<=0.12	<=0.015	16	16	NA	NA	NA	blaCMY-2	NA
18028752	2018	DTU	Denmark	Netherlands	Livestock	Broiler meat	Meat	NA	1	DTU	NA	Microdilution	Microdilution	>64	>4	>8	<=0.03	<=4	<=0.015	>64	4	1	<=0.25	<=8	<=8	<=2	<=0.25	4	4	<=0.06	<=0.12	<=0.03	8	<=0.12	<=0.015	16	8	NA	blaTEM-52C	NA	NA	NA
18028956	2018	DTU	Denmark	Denmark	Livestock	Broiler_chickens	Faeces	NA	1	DTU	NA	Microdilution	Microdilution	>64	2	2	<=0.03	64	<=0.015	<=2	<=1	<=0.5	<=0.25	<=8	<=8	4	<=0.25	32	<=0.06	1	1	<=0.03	8	<=0.12	<=0.015	2	2	NA	NA	NA	Chromosomal AmpC	NA
18028961	2018	DTU	Denmark	Denmark	Livestock	Broiler_chickens	Faeces	NA	1	DTU	NA	Microdilution	Microdilution	>64	>4	>8	<=0.03	<=4	<=0.015	<=2	<=1	1	<=0.25	<=8	<=8	8	<=0.25	>64	<=0.06	8	8	<=0.03	8	<=0.12	<=0.015	8	16	NA	NA	NA	blaCMY-2	NA
18030605	2018	DTU	Denmark	France	Livestock	Broiler meat	Meat	NA	1	DTU	NA	Microdilution	Microdilution	>64	>4	4	<=0.03	>128	<=0.015	>64	<=1	<=0.5	>32	>1024	<=8	8	<=0.25	2	>32	<=0.06	<=0.12	<=0.03	4	<=0.12	<=0.015	>64	2	blaCTX-M-1	NA	NA	NA	NA
18030826	2018	DTU	Denmark	Denmark	Livestock	Broiler_chickens	Faeces	NA	1	DTU	NA	Microdilution	Microdilution	>64	>4	>8	<=0.03	<=4	<=0.015	>64	<=1	2	>32	256	<=8	<=2	<=0.25	>64	<=0.06	4	4	<=0.03	8	<=0.12	<=0.015	16	8	NA	NA	NA	blaCMY-2	NA
18030851	2018	DTU	Denmark	Denmark	Livestock	Broiler_chickens	Faeces	NA	1	DTU	NA	Microdilution	Microdilution	>64	>4	>8	<=0.03	<=4	<=0.015	<=2	<=1	<=0.5	<=0.25	<=8	<=8	4	<=0.25	>64	<=0.06	8	8	<=0.03	8	<=0.12	<=0.015	8	16	NA	NA	NA	blaCMY-2	NA
18030862	2018	DTU	Denmark	Denmark	Livestock	Broiler_chickens	Faeces	NA	1	DTU	NA	Microdilution	Microdilution	>64	>4	>8	<=0.03	<=4	<=0.015	<=2	<=1	1	<=0.25	<=8	<=8	4	<=0.25	32	<=0.06	4	8	<=0.03	8	<=0.12	<=0.015	8	16	NA	NA	NA	blaCMY-2	NA
18030891	2018	DTU	Denmark	Denmark	Livestock	Broiler_chickens	Faeces	NA	1	DTU	NA	Microdilution	Microdilution	>64	>4	>8	<=0.03	<=4	<=0.015	<=2	<=1	<=0.5	<=0.25	<=8	<=8	4	<=0.25	>64	<=0.06	8	8	<=0.03	8	<=0.12	<=0.015	8	16	NA	NA	NA	blaCMY-2	NA
18030921	2018	DTU	Denmark	Denmark	Livestock	Broiler_chickens	Faeces	NA	1	DTU	NA	Microdilution	Microdilution	>64	>4	>8	<=0.03	<=4	<=0.015	<=2	<=1	1	<=0.25	<=8	<=8	4	<=0.25	>64	<=0.06	4	8	<=0.03	8	<=0.12	<=0.015	8	8	NA	NA	NA	blaCMY-2	NA
18030946	2018	DTU	Denmark	Denmark	Livestock	Broiler_chickens	Faeces	NA	1	DTU	NA	Microdilution	Microdilution	>64	>4	>8	<=0.03	<=4	<=0.015	<=2	<=1	1	<=0.25	<=8	<=8	4	<=0.25	>64	<=0.06	8	8	<=0.03	8	<=0.12	<=0.015	16	8	NA	NA	NA	blaCMY-2	NA
18030971	2018	DTU	Denmark	Denmark	Livestock	Broiler_chickens	Faeces	NA	1	DTU	NA	Microdilution	Microdilution	>64	>4	1	<=0.03	>128	1	>64	<=1	<=0.5	>32	<=8	64	8	<=0.25	8	16	<=0.06	<=0.12	<=0.03	16	<=0.12	<=0.015	32	1	blaCTX-M-1	NA	NA	NA	NA
18031075	2018	DTU	Denmark	Netherlands	Livestock	Broiler meat	Meat	NA	1	DTU	NA	Microdilution	Microdilution	>64	>4	>8	<=0.03	<=4	<=0.015	>64	4	1	<=0.25	<=8	<=8	<=2	<=0.25	4	1	<=0.06	<=0.12	<=0.03	4	<=0.12	<=0.015	16	8	NA	blaTEM-52C	NA	NA	NA
18031398	2018	DTU	Denmark	Denmark	Livestock	Broiler meat	Meat	NA	1	DTU	NA	Microdilution	Microdilution	>64	>4	>8	<=0.03	<=4	<=0.015	<=2	<=1	<=0.5	<=0.25	<=8	<=8	8	<=0.25	>64	<=0.06	8	8	<=0.03	8	<=0.12	<=0.015	8	16	NA	NA	NA	blaCMY-2	NA
18032235	2018	DTU	Denmark	Denmark	Livestock	Broiler_chickens	Faeces	NA	1	DTU	NA	Microdilution	Microdilution	>64	>4	>8	<=0.03	<=4	<=0.015	<=2	<=1	<=0.5	<=0.25	<=8	<=8	4	<=0.25	>64	<=0.06	8	8	<=0.03	8	<=0.12	<=0.015	8	8	NA	NA	NA	blaCMY-2	NA
18032240	2018	DTU	Denmark	Denmark	Livestock	Broiler_chickens	Faeces	NA	1	DTU	NA	Microdilution	Microdilution	>64	>4	>8	<=0.03	<=4	<=0.015	<=2	<=1	<=0.5	<=0.25	<=8	<=8	8	<=0.25	>64	<=0.06	8	8	<=0.03	8	<=0.12	<=0.015	8	16	NA	NA	NA	blaCMY-2	NA
18032243	2018	DTU	Denmark	Denmark	Livestock	Broiler_chickens	Faeces	NA	1	DTU	NA	Microdilution	Microdilution	>64	>4	>8	<=0.03	>128	<=0.015	<=2	<=1	<=0.5	<=0.25	<=8	<=8	8	<=0.25	>64	<=0.06	8	8	<=0.03	16	<=0.12	<=0.015	8	16	NA	NA	NA	blaCMY-2	NA
18032461	2018	DTU	Denmark	Denmark	Livestock	Broiler meat	Meat	NA	1	DTU	NA	Microdilution	Microdilution	>64	>4	>8	<=0.03	<=4	<=0.015	<=2	<=1	<=0.5	<=0.25	<=8	<=8	4	<=0.25	>64	<=0.06	8	8	<=0.03	4	<=0.12	<=0.015	8	16	NA	NA	NA	blaCMY-98	NA
18032476	2018	DTU	Denmark	Denmark	Livestock	Broiler meat	Meat	NA	1	DTU	NA	Microdilution	Microdilution	>64	>4	>8	<=0.03	<=4	<=0.015	<=2	<=1	1	<=0.25	<=8	<=8	4	<=0.25	>64	<=0.06	8	8	<=0.03	8	<=0.12	<=0.015	16	16	NA	NA	NA	blaCMY-2	NA
18032740	2018	DTU	Denmark	Netherlands	Livestock	Broiler meat	Meat	NA	1	DTU	NA	Microdilution	Microdilution	>64	>4	>8	<=0.03	8	<=0.015	32	<=1	<=0.5	<=0.25	>1024	<=8	4	<=0.25	8	1	<=0.06	<=0.12	<=0.03	8	<=0.12	<=0.015	8	32	NA	NA	blaSHV-12	NA	NA
18033000	2018	DTU	Denmark	Netherlands	Livestock	Broiler meat	Meat	NA	1	DTU	NA	Microdilution	Microdilution	>64	>4	>8	<=0.03	8	<=0.015	<=2	<=1	1	<=0.25	<=8	<=8	8	<=0.25	4	<=0.06	<=0.06	<=0.12	<=0.03	8	<=0.12	<=0.015	4	32	NA	NA	blaSHV-12	NA	NA
18033004	2018	DTU	Denmark	France	Livestock	Broiler meat	Meat	NA	1	DTU	NA	Microdilution	Microdilution	>64	>4	>8	<=0.03	>128	>8	>64	<=1	1	>32	>1024	<=8	4	<=0.25	8	<=0.06	<=0.06	<=0.12	<=0.03	16	<=0.12	<=0.015	8	32	NA	NA	blaSHV-12	NA	NA
18033012	2018	DTU	Denmark	Netherlands	Livestock	Broiler meat	Meat	NA	1	DTU	NA	Microdilution	Microdilution	>64	>4	2	<=0.03	<=4	<=0.015	<=2	<=1	<=0.5	>32	>1024	<=8	4	<=0.25	8	8	<=0.06	<=0.12	<=0.03	16	<=0.12	<=0.015	>64	2	blaCTX-M-1	NA	NA	NA	NA
18033129	2018	DTU	Denmark	Denmark	Livestock	Broiler_chickens	Faeces	NA	1	DTU	NA	Microdilution	Microdilution	>64	>4	>8	<=0.03	<=4	<=0.015	<=2	<=1	1	<=0.25	<=8	<=8	4	<=0.25	>64	<=0.06	8	8	<=0.03	8	<=0.12	<=0.015	8	8	NA	NA	NA	blaCMY-2	NA
18033812	2018	DTU	Denmark	Denmark	Livestock	Broiler meat	Meat	NA	1	DTU	NA	Microdilution	Microdilution	>64	>4	>8	<=0.03	<=4	<=0.015	<=2	<=1	<=0.5	<=0.25	<=8	<=8	8	<=0.25	>64	<=0.06	8	8	<=0.03	8	<=0.12	<=0.015	8	8	NA	NA	NA	blaCMY-2	NA
18034118	2018	DTU	Denmark	Netherlands	Livestock	Broiler meat	Meat	NA	1	DTU	NA	Microdilution	Microdilution	>64	>4	>8	<=0.03	>128	<=0.015	>64	<=1	1	>32	>1024	<=8	8	<=0.25	8	<=0.06	<=0.06	<=0.12	<=0.03	16	<=0.12	<=0.015	4	>128	NA	NA	blaSHV-12	NA	NA
18034121	2018	DTU	Denmark	Denmark	Livestock	Broiler meat	Meat	NA	1	DTU	NA	Microdilution	Microdilution	>64	>4	>8	<=0.03	<=4	<=0.015	<=2	<=1	<=0.5	<=0.25	<=8	<=8	8	<=0.25	>64	<=0.06	8	8	<=0.03	8	<=0.12	<=0.015	8	8	NA	NA	NA	blaCMY-2	NA
18034159	2018	DTU	Denmark	Denmark	Livestock	Broiler meat	Meat	NA	1	DTU	NA	Microdilution	Microdilution	>64	>4	>8	<=0.03	<=4	<=0.015	<=2	<=1	<=0.5	<=0.25	<=8	<=8	4	<=0.25	>64	<=0.06	8	8	<=0.03	8	<=0.12	<=0.015	16	16	NA	NA	NA	blaCMY-2	NA
18034162	2018	DTU	Denmark	France	Livestock	Broiler meat	Meat	NA	1	DTU	NA	Microdilution	Microdilution	>64	>4	2	<=0.03	<=4	<=0.015	<=2	<=1	1	<=0.25	<=8	<=8	4	<=0.25	4	4	<=0.06	<=0.12	<=0.03	8	<=0.12	<=0.015	32	1	blaCTX-M-1	NA	NA	NA	NA
18034542	2018	DTU	Denmark	France	Livestock	Broiler meat	Meat	NA	1	DTU	NA	Microdilution	Microdilution	>64	>4	>8	<=0.03	>128	>8	>64	<=1	1	>32	>1024	<=8	4	<=0.25	8	1	<=0.06	<=0.12	<=0.03	16	<=0.12	<=0.015	8	32	NA	NA	blaSHV-12	NA	NA
18034719	2018	DTU	Denmark	Denmark	Livestock	Broiler_chickens	Faeces	NA	1	DTU	NA	Microdilution	Microdilution	>64	>4	>8	<=0.03	<=4	<=0.015	<=2	<=1	1	<=0.25	<=8	<=8	4	<=0.25	>64	<=0.06	8	8	<=0.03	8	<=0.12	<=0.015	8	16	NA	NA	NA	blaCMY-2	NA
18035352	2018	DTU	Denmark	Denmark	Livestock	Broiler_chickens	Faeces	NA	1	DTU	NA	Microdilution	Microdilution	>64	>4	>8	<=0.03	<=4	<=0.015	<=2	<=1	<=0.5	<=0.25	<=8	<=8	<=2	<=0.25	>64	<=0.06	8	8	<=0.03	8	<=0.12	<=0.015	8	16	NA	NA	NA	blaCMY-2	NA
18036814	2018	DTU	Denmark	Denmark	Livestock	Broiler_chickens	Faeces	NA	1	DTU	NA	Microdilution	Microdilution	>64	>4	>8	<=0.03	<=4	<=0.015	<=2	<=1	<=0.5	<=0.25	<=8	<=8	8	<=0.25	>64	<=0.06	8	8	<=0.03	8	<=0.12	<=0.015	8	8	NA	NA	NA	blaCMY-2	NA
18037025	2018	DTU	Denmark	Denmark	Livestock	Broiler_chickens	Faeces	NA	1	DTU	NA	Microdilution	Microdilution	>64	>4	>8	<=0.03	>128	>8	>64	<=1	1	>32	>1024	<=8	4	<=0.25	8	1	<=0.06	<=0.12	<=0.03	8	<=0.12	<=0.015	8	32	NA	NA	blaSHV-12	NA	NA
18037160	2018	DTU	Denmark	Netherlands	Livestock	Broiler meat	Meat	NA	1	DTU	NA	Microdilution	Microdilution	>64	2	2	<=0.03	>128	<=0.015	<=2	<=1	<=0.5	<=0.25	<=8	<=8	8	<=0.25	8	<=0.06	<=0.06	<=0.12	<=0.03	8	<=0.12	<=0.015	2	2	NA	blaTEM-52B	NA	NA	NA
18037161	2018	DTU	Denmark	Denmark	Livestock	Broiler meat	Meat	NA	1	DTU	NA	Microdilution	Microdilution	>64	>4	>8	<=0.03	<=4	<=0.015	<=2	<=1	<=0.5	<=0.25	<=8	<=8	4	<=0.25	32	<=0.06	4	8	<=0.03	8	<=0.12	<=0.015	8	8	NA	NA	NA	blaCMY-2	NA
18037348	2018	DTU	Denmark	Netherlands	Livestock	Broiler meat	Meat	NA	1	DTU	NA	Microdilution	Microdilution	>64	>4	1	<=0.03	>128	<=0.015	32	<=1	<=0.5	>32	>1024	<=8	8	<=0.25	4	4	<=0.06	<=0.12	<=0.03	2	<=0.12	<=0.015	32	<=0.25	blaCTX-M-1	NA	NA	NA	NA
18037517	2018	DTU	Denmark	Netherlands	Livestock	Broiler meat	Meat	NA	1	DTU	NA	Microdilution	Microdilution	>64	>4	4	<=0.03	>128	<=0.015	>64	<=1	<=0.5	<=0.25	>1024	16	8	<=0.25	8	8	<=0.06	<=0.12	<=0.03	8	<=0.12	<=0.015	>64	2	blaCTX-M-1	NA	NA	NA	NA
18038135	2018	DTU	Denmark	Poland	Livestock	Broiler meat	Meat	NA	1	DTU	NA	Microdilution	Microdilution	>64	>4	1	<=0.03	>128	<=0.015	>64	<=1	1	>32	>1024	<=8	8	<=0.25	4	16	<=0.06	<=0.12	<=0.03	4	<=0.12	<=0.015	32	2	blaCTX-M-1	NA	NA	NA	NA
18038160	2018	DTU	Denmark	Netherlands	Livestock	Broiler meat	Meat	NA	1	DTU	NA	Microdilution	Microdilution	>64	>4	>8	<=0.03	>128	>8	<=2	<=1	1	>32	>1024	32	4	<=0.25	2	1	<=0.06	<=0.12	<=0.03	4	<=0.12	<=0.015	8	16	NA	NA	blaSHV-12	NA	NA
18038541	2018	DTU	Denmark	Netherlands	Livestock	Broiler meat	Meat	NA	1	DTU	NA	Microdilution	Microdilution	>64	>4	>8	<=0.03	>128	>8	>64	<=1	1	>32	>1024	32	4	<=0.25	8	1	<=0.06	<=0.12	<=0.03	4	<=0.12	<=0.015	8	16	NA	NA	blaSHV-12	NA	NA
18038543	2018	DTU	Denmark	France	Livestock	Broiler meat	Meat	NA	1	DTU	NA	Microdilution	Microdilution	>64	>4	>8	<=0.03	>128	>8	>64	<=1	1	>32	>1024	<=8	4	<=0.25	8	1	<=0.06	<=0.12	<=0.03	8	<=0.12	<=0.015	16	32	NA	NA	blaSHV-12	NA	NA
18038545	2018	DTU	Denmark	Netherlands	Livestock	Broiler meat	Meat	NA	1	DTU	NA	Microdilution	Microdilution	>64	>4	>8	<=0.03	>128	<=0.015	<=2	<=1	1	<=0.25	<=8	<=8	4	<=0.25	>64	<=0.06	4	8	<=0.03	16	<=0.12	<=0.015	8	16	NA	NA	NA	blaCMY-2	NA
18039856	2018	DTU	Denmark	Netherlands	Livestock	Broiler meat	Meat	NA	1	DTU	NA	Microdilution	Microdilution	>64	>4	4	<=0.03	>128	>8	<=2	<=1	2	<=0.25	<=8	<=8	<=2	<=0.25	2	1	<=0.06	<=0.12	<=0.03	4	<=0.12	<=0.015	8	4	NA	NA	blaSHV-2	NA	NA
18040000	2018	DTU	Denmark	France	Livestock	Broiler meat	Meat	NA	1	DTU	NA	Microdilution	Microdilution	>64	>4	2	<=0.03	<=4	<=0.015	>64	<=1	<=0.5	<=0.25	>1024	<=8	4	<=0.25	4	16	<=0.06	<=0.12	<=0.03	4	<=0.12	<=0.015	>64	2	blaCTX-M-1	NA	NA	NA	NA
18040002	2018	DTU	Denmark	France	Livestock	Broiler meat	Meat	NA	1	DTU	NA	Microdilution	Microdilution	>64	>4	2	<=0.03	<=4	<=0.015	>64	<=1	<=0.5	<=0.25	>1024	<=8	4	<=0.25	8	16	<=0.06	<=0.12	<=0.03	4	<=0.12	<=0.015	>64	2	blaCTX-M-1	NA	NA	NA	NA
18040535	2018	DTU	Denmark	Denmark	Livestock	Broiler_chickens	Faeces	NA	1	DTU	NA	Microdilution	Microdilution	>64	>4	1	<=0.03	<=4	<=0.015	4	<=1	1	<=0.25	>1024	<=8	8	<=0.25	8	16	<=0.06	<=0.12	<=0.03	4	<=0.12	<=0.015	>64	2	blaCTX-M-1	NA	NA	NA	NA
18040570	2018	DTU	Denmark	Denmark	Livestock	Broiler_chickens	Faeces	NA	1	DTU	NA	Microdilution	Microdilution	>64	>4	1	<=0.03	<=4	<=0.015	>64	<=1	1	<=0.25	>1024	<=8	4	<=0.25	2	8	<=0.06	<=0.12	<=0.03	4	<=0.12	<=0.015	>64	1	blaCTX-M-1	NA	NA	NA	NA
18040616	2018	DTU	Denmark	Denmark	Livestock	Broiler_chickens	Faeces	NA	1	DTU	NA	Microdilution	Microdilution	>64	>4	>8	<=0.03	<=4	<=0.015	<=2	<=1	<=0.5	<=0.25	<=8	<=8	8	<=0.25	>64	<=0.06	8	8	<=0.03	8	<=0.12	<=0.015	8	16	NA	NA	NA	blaCMY-2	NA
18040646	2018	DTU	Denmark	Denmark	Livestock	Broiler_chickens	Faeces	NA	1	DTU	NA	Microdilution	Microdilution	>64	>4	>8	<=0.03	<=4	<=0.015	<=2	<=1	1	<=0.25	<=8	<=8	8	<=0.25	32	<=0.06	8	8	<=0.03	8	<=0.12	<=0.015	8	16	NA	NA	NA	blaCMY-2	NA
18041449	2018	DTU	Denmark	Denmark	Livestock	Broiler meat	Meat	NA	1	DTU	NA	Microdilution	Microdilution	>64	>4	>8	<=0.03	<=4	<=0.015	<=2	<=1	1	<=0.25	<=8	<=8	8	<=0.25	>64	<=0.06	4	8	<=0.03	8	<=0.12	<=0.015	8	16	NA	NA	NA	blaCMY-2	NA
18042057	2018	DTU	Denmark	Denmark	Livestock	Broiler_chickens	Faeces	NA	1	DTU	NA	Microdilution	Microdilution	>64	>4	1	<=0.03	<=4	<=0.015	<=2	<=1	<=0.5	<=0.25	>1024	<=8	4	<=0.25	8	8	<=0.06	<=0.12	<=0.03	4	<=0.12	<=0.015	>64	1	blaCTX-M-1	NA	NA	NA	NA
18043937	2018	DTU	Denmark	Netherlands	Livestock	Broiler meat	Meat	NA	1	DTU	NA	Microdilution	Microdilution	>64	2	2	<=0.03	>128	>8	<=2	<=1	1	<=0.25	<=8	<=8	4	<=0.25	4	<=0.06	<=0.06	<=0.12	<=0.03	8	<=0.12	<=0.015	2	2	NA	blaTEM-52B	NA	NA	NA
18043938	2018	DTU	Denmark	France	Livestock	Broiler meat	Meat	NA	1	DTU	NA	Microdilution	Microdilution	>64	2	>8	<=0.03	<=4	<=0.015	<=2	<=1	1	<=0.25	<=8	<=8	4	<=0.25	>64	<=0.06	1	4	<=0.03	8	<=0.12	<=0.015	2	8	NA	NA	NA	Chromosomal AmpC	NA
18043986	2018	DTU	Denmark	Denmark	Livestock	Broiler_chickens	Faeces	NA	1	DTU	NA	Microdilution	Microdilution	>64	>4	>8	<=0.03	<=4	<=0.015	<=2	<=1	1	<=0.25	<=8	<=8	8	<=0.25	>64	<=0.06	8	8	<=0.03	8	<=0.12	<=0.015	8	16	NA	NA	NA	blaCMY-2	NA
18044027	2018	DTU	Denmark	Denmark	Livestock	Broiler_chickens	Faeces	NA	1	DTU	NA	Microdilution	Microdilution	>64	2	1	<=0.03	64	<=0.015	>64	<=1	<=0.5	<=0.25	<=8	<=8	8	<=0.25	32	<=0.06	1	1	<=0.03	8	<=0.12	<=0.015	1	2	NA	NA	NA	Chromosomal AmpC	NA
18044037	2018	DTU	Denmark	Denmark	Livestock	Broiler_chickens	Faeces	NA	1	DTU	NA	Microdilution	Microdilution	>64	>4	4	<=0.03	>128	<=0.015	4	<=1	1	<=0.25	<=8	16	8	<=0.25	32	<=0.06	1	2	<=0.03	16	<=0.12	<=0.015	2	4	NA	NA	NA	Chromosomal AmpC	NA
18044057	2018	DTU	Denmark	Denmark	Livestock	Broiler_chickens	Faeces	NA	1	DTU	NA	Microdilution	Microdilution	>64	>4	>8	<=0.03	<=4	<=0.015	<=2	<=1	1	<=0.25	<=8	<=8	4	<=0.25	>64	<=0.06	4	8	<=0.03	4	<=0.12	<=0.015	8	16	NA	NA	NA	blaCMY-2	NA
18044082	2018	DTU	Denmark	Denmark	Livestock	Broiler_chickens	Faeces	NA	1	DTU	NA	Microdilution	Microdilution	>64	>4	>8	<=0.03	<=4	<=0.015	<=2	<=1	<=0.5	<=0.25	<=8	<=8	8	<=0.25	>64	<=0.06	8	8	<=0.03	8	<=0.12	<=0.015	8	8	NA	NA	NA	blaCMY-2	NA
18044085	2018	DTU	Denmark	Denmark	Livestock	Broiler_chickens	Faeces	NA	1	DTU	NA	Microdilution	Microdilution	>64	>4	>8	<=0.03	<=4	<=0.015	<=2	<=1	2	<=0.25	<=8	<=8	4	<=0.25	32	<=0.06	8	8	<=0.03	8	<=0.12	<=0.015	8	16	NA	NA	NA	blaCMY-2	NA
18044091	2018	DTU	Denmark	Denmark	Livestock	Broiler_chickens	Faeces	NA	1	DTU	NA	Microdilution	Microdilution	>64	2	2	<=0.03	64	<=0.015	>64	<=1	1	<=0.25	<=8	<=8	8	<=0.25	>64	<=0.06	1	1	<=0.03	8	<=0.12	<=0.015	2	2	NA	NA	NA	Chromosomal AmpC	NA
18044098	2018	DTU	Denmark	Denmark	Livestock	Broiler_chickens	Faeces	NA	1	DTU	NA	Microdilution	Microdilution	>64	2	4	<=0.03	<=4	<=0.015	4	<=1	1	<=0.25	<=8	<=8	8	<=0.25	16	<=0.06	1	2	<=0.03	8	<=0.12	<=0.015	1	4	NA	NA	NA	Chromosomal AmpC	NA
18044113	2018	DTU	Denmark	Denmark	Livestock	Broiler_chickens	Faeces	NA	1	DTU	NA	Microdilution	Microdilution	>64	2	2	<=0.03	64	<=0.015	>64	<=1	1	<=0.25	<=8	<=8	4	<=0.25	32	<=0.06	<=0.06	1	<=0.03	8	<=0.12	<=0.015	2	2	NA	NA	NA	Chromosomal AmpC	NA
18045468	2018	DTU	Denmark	Denmark	Livestock	Broiler_chickens	Faeces	NA	1	DTU	NA	Microdilution	Microdilution	>64	>4	>8	<=0.03	<=4	<=0.015	<=2	<=1	1	<=0.25	<=8	<=8	8	<=0.25	>64	<=0.06	8	8	<=0.03	8	<=0.12	<=0.015	8	16	NA	NA	NA	blaCMY-2	NA
18045480	2018	DTU	Denmark	Germany	Livestock	Broiler meat	Meat	NA	1	DTU	NA	Microdilution	Microdilution	>64	2	4	<=0.03	>128	>8	>64	<=1	<=0.5	>32	>1024	<=8	8	<=0.25	32	<=0.06	1	2	<=0.03	16	<=0.12	<=0.015	2	4	NA	NA	NA	Chromosomal AmpC	NA
18045486	2018	DTU	Denmark	France	Livestock	Broiler meat	Meat	NA	1	DTU	NA	Microdilution	Microdilution	>64	>4	4	<=0.03	<=4	<=0.015	<=2	<=1	1	<=0.25	<=8	<=8	4	<=0.25	8	16	<=0.06	<=0.12	<=0.03	4	<=0.12	<=0.015	>64	2	blaCTX-M-1	NA	NA	NA	NA
18046459	2018	DTU	Denmark	Denmark	Livestock	Broiler_chickens	Faeces	NA	1	DTU	NA	Microdilution	Microdilution	>64	>4	>8	<=0.03	<=4	<=0.015	<=2	<=1	<=0.5	<=0.25	<=8	<=8	8	<=0.25	32	<=0.06	8	8	<=0.03	8	<=0.12	<=0.015	8	16	NA	NA	NA	blaCMY-2	NA
18046462	2018	DTU	Denmark	Denmark	Livestock	Broiler_chickens	Faeces	NA	1	DTU	NA	Microdilution	Microdilution	>64	>4	>8	<=0.03	<=4	<=0.015	>64	<=1	<=0.5	<=0.25	<=8	<=8	4	<=0.25	>64	<=0.06	8	8	<=0.03	8	<=0.12	<=0.015	8	16	NA	NA	NA	blaCMY-2	NA
18046469	2018	DTU	Denmark	Netherlands	Livestock	Broiler meat	Meat	NA	1	DTU	NA	Microdilution	Microdilution	>64	2	1	<=0.03	>128	<=0.015	>64	<=1	2	>32	>1024	<=8	4	<=0.25	4	<=0.06	<=0.06	<=0.12	<=0.03	4	<=0.12	<=0.015	1	1	NA	blaTEM-52B	NA	NA	NA
18046471	2018	DTU	Denmark	Netherlands	Livestock	Broiler meat	Meat	NA	1	DTU	NA	Microdilution	Microdilution	>64	>4	>8	<=0.03	<=4	<=0.015	<=2	<=1	1	<=0.25	16	<=8	4	<=0.25	>64	<=0.06	8	8	<=0.03	4	<=0.12	<=0.015	8	16	NA	NA	NA	blaCMY-2	NA
18046473	2018	DTU	Denmark	France	Livestock	Broiler meat	Meat	NA	1	DTU	NA	Microdilution	Microdilution	>64	>4	>8	<=0.03	>128	>8	>64	<=1	1	>32	>1024	<=8	8	<=0.25	8	<=0.06	<=0.06	<=0.12	<=0.03	8	<=0.12	<=0.015	8	32	NA	NA	blaSHV-12	NA	NA
18047509	2018	DTU	Denmark	Denmark	Livestock	Broiler_chickens	Faeces	NA	1	DTU	NA	Microdilution	Microdilution	>64	>4	>8	<=0.03	<=4	<=0.015	<=2	<=1	1	<=0.25	<=8	<=8	8	<=0.25	>64	<=0.06	4	8	<=0.03	8	<=0.12	<=0.015	8	16	NA	NA	NA	blaCMY-2	NA
18047810	2018	DTU	Denmark	Netherlands	Livestock	Broiler meat	Meat	NA	1	DTU	NA	Microdilution	Microdilution	>64	>4	>8	<=0.03	>128	2	<=2	<=1	1	>32	>1024	<=8	8	<=0.25	>64	<=0.06	4	8	<=0.03	8	<=0.12	<=0.015	8	16	NA	NA	NA	blaCMY-2	NA
18048138	2018	DTU	Denmark	Denmark	Livestock	Broiler meat	Meat	NA	1	DTU	NA	Microdilution	Microdilution	>64	>4	4	<=0.03	>128	2	>64	<=1	1	>32	<=8	64	8	<=0.25	16	16	<=0.06	<=0.12	<=0.03	8	<=0.12	<=0.015	>64	1	blaCTX-M-1	NA	NA	NA	NA
18049048	2018	DTU	Denmark	Denmark	Livestock	Broiler meat	Meat	NA	1	DTU	NA	Microdilution	Microdilution	>64	>4	>8	<=0.03	<=4	<=0.015	<=2	<=1	1	<=0.25	<=8	<=8	8	<=0.25	32	<=0.06	4	4	<=0.03	8	<=0.12	<=0.015	8	8	NA	NA	NA	blaCMY-2	NA
18049049	2018	DTU	Denmark	Denmark	Livestock	Broiler meat	Meat	NA	1	DTU	NA	Microdilution	Microdilution	>64	>4	1	<=0.03	>128	2	>64	<=1	1	>32	<=8	64	8	<=0.25	8	16	<=0.06	<=0.12	<=0.03	8	<=0.12	<=0.015	32	2	blaCTX-M-1	NA	NA	NA	NA
18050186	2018	DTU	Denmark	France	Livestock	Broiler meat	Meat	NA	1	DTU	NA	Microdilution	Microdilution	>64	>4	<=0.5	<=0.03	<=4	<=0.015	<=2	<=1	<=0.5	<=0.25	<=8	<=8	4	<=0.25	4	4	<=0.06	<=0.12	<=0.03	2	<=0.12	<=0.015	16	<=0.25	blaCTX-M-1	NA	NA	NA	NA
18050375	2018	DTU	Denmark	Netherlands	Livestock	Broiler meat	Meat	NA	1	DTU	NA	Microdilution	Microdilution	>64	>4	>8	<=0.03	>128	>8	<=2	<=1	1	>32	>1024	16	32	<=0.25	4	<=0.06	<=0.06	<=0.12	<=0.03	8	<=0.12	<=0.015	4	32	NA	NA	blaSHV-12	NA	NA
18052302	2018	DTU	Denmark	Netherlands	Livestock	Broiler meat	Meat	NA	1	DTU	NA	Microdilution	Microdilution	>64	>4	>8	<=0.03	>128	<=0.015	4	<=1	1	>32	>1024	16	16	<=0.25	8	>32	<=0.06	<=0.12	<=0.03	8	<=0.12	<=0.015	>64	16	blaCTX-M-32	NA	NA	NA	NA
18053056	2018	DTU	Denmark	Denmark	Livestock	Broiler_chickens	Faeces	NA	1	DTU	NA	Microdilution	Microdilution	>64	>4	>8	<=0.03	<=4	<=0.015	<=2	<=1	1	<=0.25	<=8	<=8	8	<=0.25	32	<=0.06	8	8	<=0.03	8	<=0.12	<=0.015	8	16	NA	NA	NA	blaCMY-2	NA
18053059	2018	DTU	Denmark	Denmark	Livestock	Broiler_chickens	Faeces	NA	1	DTU	NA	Microdilution	Microdilution	>64	>4	2	<=0.03	>128	<=0.015	<=2	<=1	<=0.5	<=0.25	<=8	<=8	8	<=0.25	2	8	<=0.06	<=0.12	<=0.03	4	<=0.12	<=0.015	>64	1	blaCTX-M-1	NA	NA	NA	NA
18053060	2018	DTU	Denmark	Denmark	Livestock	Broiler_chickens	Faeces	NA	1	DTU	NA	Microdilution	Microdilution	>64	>4	>8	<=0.03	<=4	<=0.015	<=2	<=1	1	<=0.25	<=8	<=8	8	<=0.25	>64	<=0.06	4	8	<=0.03	8	<=0.12	<=0.015	8	16	NA	NA	NA	blaCMY-2	NA
18053144	2018	DTU	Denmark	Netherlands	Livestock	Broiler meat	Meat	NA	1	DTU	NA	Microdilution	Microdilution	>64	>4	>8	<=0.03	<=4	<=0.015	>64	<=1	>32	<=0.25	>1024	>128	4	<=0.25	32	<=0.06	8	4	<=0.03	4	<=0.12	<=0.015	8	16	NA	NA	NA	blaCMY-2	NA
18054344	2018	DTU	Denmark	Denmark	Livestock	Broiler_chickens	Faeces	NA	1	DTU	NA	Microdilution	Microdilution	>64	>4	>8	<=0.03	<=4	<=0.015	<=2	<=1	<=0.5	<=0.25	<=8	<=8	<=2	<=0.25	32	<=0.06	4	4	<=0.03	4	<=0.12	<=0.015	8	8	NA	NA	NA	blaCMY-2	NA
18054346	2018	DTU	Denmark	Denmark	Livestock	Broiler_chickens	Faeces	NA	1	DTU	NA	Microdilution	Microdilution	>64	>4	1	<=0.03	>128	<=0.015	<=2	<=1	<=0.5	<=0.25	<=8	<=8	8	<=0.25	2	>32	<=0.06	<=0.12	<=0.03	4	<=0.12	<=0.015	>64	1	blaCTX-M-1	NA	NA	NA	NA
18054788	2018	DTU	Denmark	Denmark	Livestock	Broiler meat	Meat	NA	1	DTU	NA	Microdilution	Microdilution	>64	>4	>8	<=0.03	<=4	<=0.015	<=2	<=1	1	<=0.25	<=8	<=8	4	<=0.25	>64	<=0.06	4	4	<=0.03	8	<=0.12	<=0.015	16	8	NA	NA	NA	blaCMY-2	NA
18056215	2018	DTU	Denmark	Netherlands	Livestock	Broiler meat	Meat	NA	1	DTU	NA	Microdilution	Microdilution	>64	>4	<=0.5	<=0.03	>128	<=0.015	>64	<=1	<=0.5	>32	>1024	<=8	8	<=0.25	2	2	<=0.06	<=0.12	<=0.03	4	<=0.12	<=0.015	32	<=0.25	blaCTX-M-1	NA	NA	NA	NA
18056646	2018	DTU	Denmark	Denmark	Livestock	Broiler meat	Meat	NA	1	DTU	NA	Microdilution	Microdilution	>64	>4	2	<=0.03	<=4	<=0.015	>64	<=1	2	<=0.25	>1024	<=8	8	<=0.25	4	8	<=0.06	<=0.12	<=0.03	4	<=0.12	<=0.015	>64	1	blaCTX-M-1	NA	NA	NA	NA
18056739	2018	DTU	Denmark	Denmark	Livestock	Broiler_chickens	Faeces	NA	1	DTU	NA	Microdilution	Microdilution	>64	>4	>8	<=0.03	<=4	<=0.015	<=2	<=1	1	<=0.25	<=8	<=8	8	<=0.25	32	<=0.06	4	8	<=0.03	32	<=0.12	<=0.015	8	16	NA	NA	NA	blaCMY-2	NA
18057552	2018	DTU	Denmark	Denmark	Livestock	Broiler meat	Meat	NA	1	DTU	NA	Microdilution	Microdilution	>64	>4	2	<=0.03	<=4	<=0.015	<=2	<=1	1	<=0.25	>1024	<=8	8	<=0.25	8	8	<=0.06	<=0.12	<=0.03	8	<=0.12	<=0.015	>64	2	blaCTX-M-1	NA	NA	NA	NA
18058909	2018	DTU	Denmark	Denmark	Livestock	Broiler meat	Meat	NA	1	DTU	NA	Microdilution	Microdilution	>64	>4	1	<=0.03	>128	>8	4	<=1	1	<=0.25	16	<=8	8	<=0.25	8	8	<=0.06	<=0.12	<=0.03	8	<=0.12	<=0.015	>64	1	blaCTX-M-14	NA	NA	NA	NA
19007184	2019	DTU	Denmark	Denmark	Livestock	Cattle	Faeces	NA	1	DTU	NA	Microdilution	Microdilution	>64	>4	2	<=0.03	<=4	<=0.015	<=2	<=1	<=0.5	<=0.25	<=8	<=8	8	<=0.25	4	>32	<=0.06	<=0.12	<=0.03	16	<=0.12	<=0.015	>64	4	blaCTX-M-14	NA	NA	NA	NA
19007188	2019	DTU	Denmark	Denmark	Livestock	Cattle	Faeces	NA	1	DTU	NA	Microdilution	Microdilution	>64	2	8	<=0.03	<=4	<=0.015	>64	<=1	1	>32	>1024	>128	4	<=0.25	32	<=0.06	2	4	<=0.03	8	<=0.12	<=0.015	4	8	NA	NA	NA	C-42T	NA
19007197	2019	DTU	Denmark	Denmark	Livestock	Cattle	Faeces	NA	1	DTU	NA	Microdilution	Microdilution	>64	2	4	<=0.03	<=4	<=0.015	<=2	<=1	1	<=0.25	<=8	<=8	4	<=0.25	32	<=0.06	2	4	<=0.03	16	<=0.12	<=0.015	2	8	NA	NA	NA	C-42T	NA
19007203	2019	DTU	Denmark	Denmark	Livestock	Cattle	Faeces	NA	1	DTU	NA	Microdilution	Microdilution	>64	>4	1	<=0.03	<=4	<=0.015	<=2	<=1	1	>32	>1024	<=8	4	<=0.25	4	2	<=0.06	<=0.12	<=0.03	8	<=0.12	<=0.015	64	1	blaCTX-M-1	NA	NA	NA	NA
19007213	2019	DTU	Denmark	Denmark	Livestock	Cattle	Faeces	NA	1	DTU	NA	Microdilution	Microdilution	>64	>4	<=0.5	<=0.03	<=4	<=0.015	<=2	<=1	1	<=0.25	16	<=8	8	<=0.25	4	16	<=0.06	<=0.12	<=0.03	4	<=0.12	<=0.015	>64	1	blaCTX-M-14	NA	NA	NA	NA
19007602	2019	DTU	Denmark	Denmark	Livestock	Cattle	Faeces	NA	1	DTU	NA	Microdilution	Microdilution	>64	>4	1	<=0.03	>128	8	>64	<=1	<=0.5	<=0.25	>1024	>128	32	<=0.25	4	4	<=0.06	<=0.12	<=0.03	4	<=0.12	<=0.015	64	1	blaCTX-M-14	NA	NA	NA	NA
19008015	2019	DTU	Denmark	Denmark	Livestock	Pigs	Faeces	NA	1	DTU	NA	Microdilution	Microdilution	>64	4	8	<=0.03	<=4	<=0.015	<=2	<=1	<=0.5	<=0.25	<=8	<=8	4	<=0.25	64	<=0.06	2	4	<=0.03	8	<=0.12	<=0.015	4	8	NA	NA	NA	C-42T	NA
19008229	2019	DTU	Denmark	Denmark	Livestock	Pigs	Faeces	NA	1	DTU	NA	Microdilution	Microdilution	>64	>4	1	<=0.03	<=4	<=0.015	>64	<=1	<=0.5	<=0.25	>1024	<=8	4	<=0.25	4	8	<=0.06	<=0.12	<=0.03	4	<=0.12	<=0.015	64	1	blaCTX-M-1	NA	NA	NA	NA
19008233	2019	DTU	Denmark	Denmark	Livestock	Pigs	Faeces	NA	1	DTU	NA	Microdilution	Microdilution	>64	>4	1	<=0.03	<=4	<=0.015	64	<=1	2	>32	>1024	<=8	8	<=0.25	4	4	<=0.06	<=0.12	<=0.03	4	<=0.12	<=0.015	64	2	blaCTX-M-1	NA	NA	NA	NA
19008234	2019	DTU	Denmark	Denmark	Livestock	Pigs	Faeces	NA	1	DTU	NA	Microdilution	Microdilution	>64	2	8	<=0.03	<=4	<=0.015	>64	<=1	<=0.5	<=0.25	<=8	<=8	4	<=0.25	32	<=0.06	2	4	<=0.03	8	<=0.12	<=0.015	2	4	NA	NA	NA	C-42T	NA
19008237	2019	DTU	Denmark	Denmark	Livestock	Pigs	Faeces	NA	1	DTU	NA	Microdilution	Microdilution	>64	2	4	<=0.03	<=4	<=0.015	32	<=1	<=0.5	>32	>1024	<=8	8	<=0.25	32	<=0.06	2	4	<=0.03	8	<=0.12	<=0.015	2	4	NA	NA	NA	C-42T	NA
19008238	2019	DTU	Denmark	Denmark	Livestock	Pigs	Faeces	NA	1	DTU	NA	Microdilution	Microdilution	>64	>4	1	<=0.03	<=4	<=0.015	<=2	<=1	1	<=0.25	>1024	<=8	8	<=0.25	2	32	<=0.06	<=0.12	<=0.03	4	<=0.12	<=0.015	>64	1	blaCTX-M-1	NA	NA	NA	NA
19008239	2019	DTU	Denmark	Denmark	Livestock	Pigs	Faeces	NA	1	DTU	NA	Microdilution	Microdilution	>64	2	4	<=0.03	<=4	<=0.015	<=2	<=1	<=0.5	>32	<=8	<=8	4	<=0.25	16	<=0.06	1	4	<=0.03	8	<=0.12	<=0.015	1	4	NA	NA	NA	C-42T	NA
19008245	2019	DTU	Denmark	Denmark	Livestock	Pigs	Faeces	NA	1	DTU	NA	Microdilution	Microdilution	>64	2	4	<=0.03	<=4	<=0.015	<=2	<=1	<=0.5	<=0.25	16	<=8	8	<=0.25	16	<=0.06	2	4	<=0.03	16	<=0.12	<=0.015	2	2	NA	NA	NA	C-42T	NA
19008247	2019	DTU	Denmark	Denmark	Livestock	Pigs	Faeces	NA	1	DTU	NA	Microdilution	Microdilution	>64	>4	1	<=0.03	<=4	<=0.015	<=2	<=1	1	<=0.25	>1024	<=8	4	<=0.25	4	16	<=0.06	<=0.12	<=0.03	4	<=0.12	<=0.015	>64	1	blaCTX-M-1	NA	NA	NA	NA
19008248	2019	DTU	Denmark	Denmark	Livestock	Pigs	Faeces	NA	1	DTU	NA	Microdilution	Microdilution	>64	4	4	<=0.03	<=4	<=0.015	<=2	<=1	<=0.5	<=0.25	<=8	<=8	4	<=0.25	32	<=0.06	1	2	<=0.03	8	<=0.12	<=0.015	4	4	NA	NA	NA	C-42T	NA
19008249	2019	DTU	Denmark	Denmark	Livestock	Pigs	Faeces	NA	1	DTU	NA	Microdilution	Microdilution	>64	>4	2	<=0.03	<=4	<=0.015	<=2	<=1	<=0.5	>32	>1024	<=8	4	<=0.25	4	16	<=0.06	<=0.12	<=0.03	4	<=0.12	<=0.015	>64	2	blaCTX-M-1	NA	NA	NA	NA
19008250	2019	DTU	Denmark	Denmark	Livestock	Pigs	Faeces	NA	1	DTU	NA	Microdilution	Microdilution	>64	>4	1	<=0.03	<=4	<=0.015	64	<=1	2	>32	>1024	<=8	4	<=0.25	4	8	<=0.06	<=0.12	<=0.03	8	<=0.12	<=0.015	64	1	blaCTX-M-1	NA	NA	NA	NA
19008252	2019	DTU	Denmark	Denmark	Livestock	Pigs	Faeces	NA	1	DTU	NA	Microdilution	Microdilution	>64	>4	1	<=0.03	<=4	<=0.015	<=2	<=1	1	<=0.25	<=8	<=8	4	<=0.25	4	8	<=0.06	<=0.12	<=0.03	4	<=0.12	<=0.015	>64	1	blaCTX-M-14	NA	NA	NA	NA
19008254	2019	DTU	Denmark	Denmark	Livestock	Pigs	Faeces	NA	1	DTU	NA	Microdilution	Microdilution	64	0	1	<=0.03	<=4	<=0.015	>64	<=1	1	1	>1024	<=8	8	<=0.25	16	<=0.06	<=0.06	<=0.12	<=0.03	8	<=0.12	<=0.015	<=0.06	1	NA	NA	NA	T-32A	NA
19008255	2019	DTU	Denmark	Denmark	Livestock	Pigs	Faeces	NA	1	DTU	NA	Microdilution	Microdilution	>64	2	8	<=0.03	<=4	<=0.015	<=2	<=1	<=0.5	>32	>1024	<=8	4	<=0.25	64	<=0.06	2	4	<=0.03	4	<=0.12	<=0.015	4	8	NA	NA	NA	C-42T	NA
19008963	2019	DTU	Denmark	Denmark	Livestock	Pigs	Faeces	NA	1	DTU	NA	Microdilution	Microdilution	>64	2	8	<=0.03	<=4	<=0.015	>64	<=1	1	>32	>1024	<=8	4	<=0.25	64	<=0.06	1	8	<=0.03	4	<=0.12	<=0.015	4	16	NA	NA	NA	C-42T	NA
19010686	2019	DTU	Denmark	Denmark	Livestock	Pigs	Faeces	NA	1	DTU	NA	Microdilution	Microdilution	>64	>4	4	<=0.03	<=4	<=0.015	<=2	<=1	<=0.5	<=0.25	<=8	<=8	4	<=0.25	8	8	<=0.06	<=0.12	<=0.03	8	<=0.12	<=0.015	>64	4	blaCTX-M-1	NA	NA	NA	NA
19010687	2019	DTU	Denmark	Denmark	Livestock	Pigs	Faeces	NA	1	DTU	NA	Microdilution	Microdilution	>64	2	8	<=0.03	<=4	<=0.015	>64	<=1	<=0.5	>32	>1024	<=8	4	<=0.25	32	<=0.06	2	8	<=0.03	8	<=0.12	<=0.015	4	8	NA	NA	NA	C-42T	NA
19011089	2019	DTU	Denmark	Denmark	Livestock	Pigs	Faeces	NA	1	DTU	NA	Microdilution	Microdilution	>64	2	8	<=0.03	<=4	<=0.015	32	<=1	<=0.5	<=0.25	>1024	<=8	4	<=0.25	64	<=0.06	1	4	<=0.03	8	<=0.12	<=0.015	2	8	NA	NA	NA	C-42T	NA
19011091	2019	DTU	Denmark	Denmark	Livestock	Pigs	Faeces	NA	1	DTU	NA	Microdilution	Microdilution	>64	2	8	<=0.03	<=4	<=0.015	64	<=1	<=0.5	<=0.25	>1024	<=8	4	<=0.25	64	<=0.06	1	4	<=0.03	8	<=0.12	<=0.015	4	8	NA	NA	NA	C-42T	NA
19011092	2019	DTU	Denmark	Denmark	Livestock	Broiler meat	Meat	NA	1	DTU	NA	Microdilution	Microdilution	>64	>4	1	<=0.03	>128	>8	<=2	<=1	1	<=0.25	<=8	<=8	4	<=0.25	8	8	<=0.06	<=0.12	<=0.03	4	<=0.12	<=0.015	64	1	blaCTX-M-14	NA	NA	NA	NA
19011151	2019	DTU	Denmark	Denmark	Livestock	Cattle	Faeces	NA	1	DTU	NA	Microdilution	Microdilution	>64	>4	2	<=0.03	<=4	<=0.015	<=2	<=1	1	>32	>1024	<=8	64	<=0.25	4	16	<=0.06	<=0.12	<=0.03	16	<=0.12	<=0.015	>64	2	blaCTX-M-1	NA	NA	NA	NA
19011713	2019	DTU	Denmark	Netherlands	Livestock	Pork	Meat	NA	1	DTU	NA	Microdilution	Microdilution	>64	>4	1	<=0.03	<=4	<=0.015	64	<=1	<=0.5	<=0.25	>1024	<=8	8	<=0.25	4	8	<=0.06	<=0.12	<=0.03	4	<=0.12	<=0.015	>64	1	blaCTX-M-1	NA	NA	NA	NA
19012643	2019	DTU	Denmark	Netherlands	Livestock	Pork	Meat	NA	1	DTU	NA	Microdilution	Microdilution	>64	>4	>8	<=0.03	<=4	<=0.015	<=2	<=1	<=0.5	<=0.25	<=8	<=8	8	<=0.25	>64	<=0.06	4	8	<=0.03	16	<=0.12	<=0.015	8	16	NA	NA	NA	C-42T	NA
19012798	2019	DTU	Denmark	Netherlands	Livestock	Broiler meat	Meat	NA	1	DTU	NA	Microdilution	Microdilution	>64	>4	>8	<=0.03	>128	8	>64	<=1	<=0.5	>32	>1024	<=8	4	<=0.25	4	1	<=0.06	<=0.12	<=0.03	8	<=0.12	<=0.015	8	32	NA	NA	blaSHV-12	NA	NA
19013520	2019	DTU	Denmark	Denmark	Livestock	Pigs	Faeces	NA	1	DTU	NA	Microdilution	Microdilution	>64	2	4	<=0.03	<=4	<=0.015	>64	<=1	<=0.5	>32	>1024	<=8	4	<=0.25	32	<=0.06	1	4	<=0.03	16	<=0.12	<=0.015	2	8	NA	NA	NA	C-42T	NA
19013813	2019	DTU	Denmark	Denmark	Livestock	Pigs	Faeces	NA	1	DTU	NA	Microdilution	Microdilution	>64	2	4	<=0.03	<=4	<=0.015	<=2	<=1	<=0.5	<=0.25	>1024	<=8	8	<=0.25	32	<=0.06	1	4	<=0.03	4	<=0.12	<=0.015	2	4	NA	NA	NA	C-42T	NA
19013857	2019	DTU	Denmark	Denmark	Livestock	Pigs	Faeces	NA	1	DTU	NA	Microdilution	Microdilution	>64	>4	1	<=0.03	16	<=0.015	64	<=1	16	<=0.25	>1024	<=8	4	<=0.25	2	16	<=0.06	<=0.12	<=0.03	8	<=0.12	<=0.015	>64	1	blaCTX-M-1	NA	NA	NA	NA
19013864	2019	DTU	Denmark	Denmark	Livestock	Pigs	Faeces	NA	1	DTU	NA	Microdilution	Microdilution	>64	4	8	<=0.03	<=4	<=0.015	>64	<=1	<=0.5	>32	>1024	<=8	4	<=0.25	32	<=0.06	2	4	<=0.03	8	<=0.12	<=0.015	2	8	NA	NA	NA	C-42T	NA
19013877	2019	DTU	Denmark	Denmark	Livestock	Pigs	Faeces	NA	1	DTU	NA	Microdilution	Microdilution	>64	4	8	<=0.03	<=4	<=0.015	>64	<=1	1	>32	>1024	<=8	4	<=0.25	32	<=0.06	2	8	<=0.03	8	<=0.12	<=0.015	4	8	NA	NA	NA	C-42T	NA
19013889	2019	DTU	Denmark	Denmark	Livestock	Pigs	Faeces	NA	1	DTU	NA	Microdilution	Microdilution	>64	1	4	<=0.03	<=4	<=0.015	64	<=1	>32	>32	>1024	<=8	8	<=0.25	16	<=0.06	1	2	<=0.03	8	<=0.12	<=0.015	1	4	NA	NA	NA	C-42T	NA
19014872	2019	DTU	Denmark	Denmark	Livestock	Pigs	Faeces	NA	1	DTU	NA	Microdilution	Microdilution	>64	2	8	<=0.03	<=4	<=0.015	>64	<=1	<=0.5	<=0.25	>1024	<=8	4	<=0.25	64	<=0.06	2	4	<=0.03	8	<=0.12	<=0.015	2	8	NA	NA	NA	C-42T	NA
19015853	2019	DTU	Denmark	Netherlands	Livestock	Pork	Meat	NA	1	DTU	NA	Microdilution	Microdilution	>64	4	8	<=0.03	<=4	<=0.015	>64	<=1	1	>32	>1024	16	8	<=0.25	>64	<=0.06	2	4	<=0.03	16	<=0.12	<=0.015	4	8	NA	NA	NA	C-42T	NA
19016310	2019	DTU	Denmark	Netherlands	Livestock	Pork	Meat	NA	1	DTU	NA	Microdilution	Microdilution	>64	2	4	<=0.03	<=4	<=0.015	<=2	<=1	<=0.5	>32	<=8	<=8	4	<=0.25	32	<=0.06	1	4	<=0.03	8	<=0.12	<=0.015	2	4	NA	NA	NA	C-42T	NA
19016419	2019	DTU	Denmark	Denmark	Livestock	Broiler meat	Meat	NA	1	DTU	NA	Microdilution	Microdilution	>64	2	1	<=0.03	64	<=0.015	<=2	<=1	<=0.5	<=0.25	<=8	<=8	8	<=0.25	16	<=0.06	<=0.06	1	<=0.03	8	<=0.12	<=0.015	1	1	NA	NA	NA	C-42T	NA
19016420	2019	DTU	Denmark	Denmark	Livestock	Broiler meat	Meat	NA	1	DTU	NA	Microdilution	Microdilution	>64	2	1	<=0.03	128	<=0.015	>64	<=1	<=0.5	<=0.25	<=8	<=8	8	<=0.25	64	<=0.06	1	1	<=0.03	8	<=0.12	<=0.015	2	2	NA	NA	NA	C-42T	NA
19016428	2019	DTU	Denmark	Denmark	Livestock	Broiler meat	Meat	NA	1	DTU	NA	Microdilution	Microdilution	>64	2	2	<=0.03	128	<=0.015	<=2	<=1	<=0.5	<=0.25	<=8	16	4	<=0.25	32	<=0.06	1	1	<=0.03	8	<=0.12	<=0.015	1	2	NA	NA	NA	C-42T	NA
19016894	2019	DTU	Denmark	Denmark	Livestock	Pigs	Faeces	NA	1	DTU	NA	Microdilution	Microdilution	>64	>4	>8	<=0.03	8	<=0.015	64	<=1	>32	<=0.25	>1024	128	4	<=0.25	4	32	<=0.06	<=0.12	<=0.03	16	<=0.12	<=0.015	>64	32	blaCTX-M-32	NA	NA	NA	NA
19016896	2019	DTU	Denmark	Denmark	Livestock	Pigs	Faeces	NA	1	DTU	NA	Microdilution	Microdilution	>64	>4	1	<=0.03	<=4	<=0.015	>64	<=1	<=0.5	>32	>1024	<=8	4	<=0.25	4	8	<=0.06	<=0.12	<=0.03	8	<=0.12	<=0.015	64	2	blaCTX-M-1	NA	NA	NA	NA
19017043	2019	DTU	Denmark	Netherlands	Livestock	Broiler meat	Meat	NA	1	DTU	NA	Microdilution	Microdilution	>64	>4	>8	<=0.03	>128	<=0.015	4	<=1	1	>32	>1024	<=8	8	<=0.25	8	16	<=0.06	<=0.12	<=0.03	4	<=0.12	<=0.015	>64	4	blaCTX-M-32	NA	NA	NA	NA
19017229	2019	DTU	Denmark	Denmark	Livestock	Pigs	Faeces	NA	1	DTU	NA	Microdilution	Microdilution	>64	4	>8	<=0.03	<=4	<=0.015	64	<=1	<=0.5	<=0.25	>1024	<=8	4	<=0.25	64	<=0.06	1	4	<=0.03	8	<=0.12	<=0.015	4	16	NA	NA	NA	C-42T	NA
19017612	2019	DTU	Denmark	Netherlands	Livestock	Pork	Meat	NA	1	DTU	NA	Microdilution	Microdilution	>64	>4	>8	<=0.03	<=4	<=0.015	4	<=1	<=0.5	<=0.25	>1024	<=8	8	<=0.25	8	8	<=0.06	<=0.12	<=0.03	16	<=0.12	<=0.015	64	32	blaCTX-M-1	NA	blaSHV-12	NA	NA
19017619	2019	DTU	Denmark	Netherlands	Livestock	Pork	Meat	NA	1	DTU	NA	Microdilution	Microdilution	>64	4	8	<=0.03	<=4	<=0.015	<=2	<=1	<=0.5	<=0.25	<=8	<=8	4	<=0.25	32	<=0.06	2	8	<=0.03	8	<=0.12	<=0.015	4	8	NA	NA	NA	C-42T	NA
19017857	2019	DTU	Denmark	Netherlands	Livestock	Pork	Meat	NA	1	DTU	NA	Microdilution	Microdilution	>64	>4	1	<=0.03	<=4	<=0.015	<=2	<=1	<=0.5	>32	>1024	<=8	4	<=0.25	4	4	<=0.06	<=0.12	<=0.03	8	<=0.12	<=0.015	32	2	blaCTX-M-1	NA	NA	NA	NA
19019271	2019	DTU	Denmark	Denmark	Livestock	Pigs	Faeces	NA	1	DTU	NA	Microdilution	Microdilution	>64	>4	8	<=0.03	<=4	<=0.015	>64	<=1	<=0.5	<=0.25	<=8	<=8	8	<=0.25	16	<=0.06	2	4	<=0.03	8	<=0.12	<=0.015	4	8	NA	NA	NA	C-42T	NA
19019272	2019	DTU	Denmark	Denmark	Livestock	Pigs	Faeces	NA	1	DTU	NA	Microdilution	Microdilution	>64	>4	4	<=0.03	<=4	<=0.015	>64	<=1	1	>32	>1024	<=8	8	<=0.25	8	32	<=0.06	<=0.12	<=0.03	16	<=0.12	<=0.015	>64	8	blaCTX-M-1	NA	NA	NA	NA
19019277	2019	DTU	Denmark	Denmark	Livestock	Pigs	Faeces	NA	1	DTU	NA	Microdilution	Microdilution	>64	2	4	<=0.03	<=4	<=0.015	>64	<=1	32	>32	>1024	<=8	8	<=0.25	16	<=0.06	2	4	<=0.03	16	<=0.12	<=0.015	2	4	NA	NA	NA	C-42T	NA
19019297	2019	DTU	Denmark	Denmark	Livestock	Pigs	Faeces	NA	1	DTU	NA	Microdilution	Microdilution	>64	2	8	<=0.03	<=4	<=0.015	<=2	<=1	<=0.5	>32	>1024	<=8	8	<=0.25	32	<=0.06	2	8	<=0.03	16	<=0.12	<=0.015	4	8	NA	NA	NA	C-42T	NA
19020759	2019	DTU	Denmark	Denmark	Livestock	Cattle	Faeces	NA	1	DTU	NA	Microdilution	Microdilution	>64	2	4	<=0.03	<=4	<=0.015	>64	<=1	1	<=0.25	>1024	<=8	8	<=0.25	16	<=0.06	1	2	<=0.03	8	<=0.12	<=0.015	1	4	NA	NA	NA	C-42T	NA
19023334	2019	DTU	Denmark	Denmark	Livestock	Broiler meat	Meat	NA	1	DTU	NA	Microdilution	Microdilution	>64	2	4	<=0.03	<=4	<=0.015	<=2	<=1	<=0.5	1	32	<=8	8	<=0.25	32	<=0.06	1	4	<=0.03	4	<=0.12	<=0.015	2	8	NA	NA	NA	C-42T	NA
19023800	2019	DTU	Denmark	Denmark	Livestock	Pigs	Faeces	NA	1	DTU	NA	Microdilution	Microdilution	>64	>4	1	<=0.03	<=4	<=0.015	>64	<=1	<=0.5	>32	>1024	<=8	4	<=0.25	8	16	<=0.06	<=0.12	<=0.03	16	<=0.12	<=0.015	>64	1	blaCTX-M-1	NA	NA	NA	NA
19023801	2019	DTU	Denmark	Denmark	Livestock	Pigs	Faeces	NA	1	DTU	NA	Microdilution	Microdilution	>64	>4	1	<=0.03	<=4	<=0.015	>64	<=1	1	>32	>1024	<=8	4	<=0.25	8	16	<=0.06	<=0.12	<=0.03	16	<=0.12	<=0.015	>64	2	blaCTX-M-1	NA	NA	NA	NA
19023802	2019	DTU	Denmark	Denmark	Livestock	Pigs	Faeces	NA	1	DTU	NA	Microdilution	Microdilution	>64	4	8	<=0.03	<=4	<=0.015	4	<=1	<=0.5	<=0.25	<=8	<=8	8	<=0.25	64	<=0.06	2	8	<=0.03	16	<=0.12	<=0.015	4	16	NA	NA	NA	C-42T	NA
19023803	2019	DTU	Denmark	Denmark	Livestock	Pigs	Faeces	NA	1	DTU	NA	Microdilution	Microdilution	>64	2	4	<=0.03	<=4	<=0.015	<=2	<=1	<=0.5	<=0.25	16	<=8	8	<=0.25	16	<=0.06	1	4	<=0.03	16	<=0.12	<=0.015	2	4	NA	NA	NA	C-42T	NA
19023805	2019	DTU	Denmark	Denmark	Livestock	Pigs	Faeces	NA	1	DTU	NA	Microdilution	Microdilution	>64	1	4	<=0.03	<=4	<=0.015	64	<=1	2	<=0.25	<=8	<=8	4	<=0.25	16	<=0.06	1	2	<=0.03	8	<=0.12	<=0.015	1	2	NA	NA	NA	C-42T	NA
19024625	2019	DTU	Denmark	Netherlands	Livestock	Pork	Meat	NA	1	DTU	NA	Microdilution	Microdilution	>64	>4	1	<=0.03	<=4	<=0.015	<=2	<=1	<=0.5	<=0.25	>1024	<=8	4	<=0.25	2	4	<=0.06	<=0.12	<=0.03	4	<=0.12	<=0.015	64	1	blaCTX-M-1	NA	NA	NA	NA
19025630	2019	DTU	Denmark	Denmark	Livestock	Pigs	Faeces	NA	1	DTU	NA	Microdilution	Microdilution	>64	2	8	<=0.03	<=4	<=0.015	64	<=1	<=0.5	<=0.25	>1024	<=8	4	<=0.25	64	<=0.06	1	4	<=0.03	8	<=0.12	<=0.015	2	8	NA	NA	NA	C-42T	NA
19025631	2019	DTU	Denmark	Denmark	Livestock	Pigs	Faeces	NA	1	DTU	NA	Microdilution	Microdilution	>64	4	8	<=0.03	<=4	<=0.015	<=2	<=1	<=0.5	>32	32	<=8	4	<=0.25	64	<=0.06	2	8	<=0.03	8	<=0.12	<=0.015	4	16	NA	NA	NA	C-42T	NA
19025632	2019	DTU	Denmark	Denmark	Livestock	Pigs	Faeces	NA	1	DTU	NA	Microdilution	Microdilution	>64	2	8	<=0.03	<=4	<=0.015	<=2	<=1	<=0.5	<=0.25	<=8	<=8	4	<=0.25	32	<=0.06	2	4	<=0.03	8	<=0.12	<=0.015	4	8	NA	NA	NA	C-42T	NA
19025671	2019	DTU	Denmark	Denmark	Livestock	Cattle	Faeces	NA	1	DTU	NA	Microdilution	Microdilution	>64	2	4	<=0.03	<=4	<=0.015	<=2	<=1	<=0.5	<=0.25	<=8	<=8	8	<=0.25	32	<=0.06	2	4	<=0.03	8	<=0.12	<=0.015	2	4	NA	NA	NA	C-42T	NA
19025768	2019	DTU	Denmark	Denmark	Livestock	Pigs	Faeces	NA	1	DTU	NA	Microdilution	Microdilution	>64	2	8	<=0.03	<=4	<=0.015	<=2	<=1	<=0.5	<=0.25	16	<=8	4	<=0.25	64	<=0.06	1	4	<=0.03	4	<=0.12	<=0.015	2	8	NA	NA	NA	C-42T	NA
19025829	2019	DTU	Denmark	France	Livestock	Broiler meat	Meat	NA	1	DTU	NA	Microdilution	Microdilution	>64	>4	8	<=0.03	32	<=0.015	>64	<=1	<=0.5	>32	>1024	<=8	4	<=0.25	8	8	<=0.06	<=0.12	<=0.03	8	<=0.12	<=0.015	>64	8	blaCTX-M-15	NA	NA	NA	NA
19026851	2019	DTU	Denmark	Denmark	Livestock	Pigs	Faeces	NA	1	DTU	NA	Microdilution	Microdilution	>64	2	4	<=0.03	<=4	<=0.015	64	<=1	1	<=0.25	>1024	128	4	<=0.25	32	<=0.06	1	2	<=0.03	4	<=0.12	<=0.015	2	8	NA	NA	NA	C-42T	NA
19027480	2019	DTU	Denmark	Denmark	Livestock	Pigs	Faeces	NA	1	DTU	NA	Microdilution	Microdilution	>64	2	8	<=0.03	<=4	<=0.015	>64	<=1	<=0.5	<=0.25	<=8	<=8	4	<=0.25	32	<=0.06	2	4	<=0.03	4	<=0.12	<=0.015	4	8	NA	NA	NA	C-42T	NA
19027811	2019	DTU	Denmark	Netherlands	Livestock	Beef	Meat	NA	1	DTU	NA	Microdilution	Microdilution	>64	>4	2	<=0.03	<=4	<=0.015	64	<=1	<=0.5	<=0.25	<=8	<=8	4	<=0.25	2	32	<=0.06	<=0.12	<=0.03	8	<=0.12	<=0.015	>64	2	blaCTX-M-1	NA	NA	NA	NA
19027880	2019	DTU	Denmark	Denmark	Livestock	Pigs	Faeces	NA	1	DTU	NA	Microdilution	Microdilution	>64	2	2	<=0.03	<=4	<=0.015	<=2	<=1	1	<=0.25	16	<=8	8	<=0.25	32	<=0.06	1	2	<=0.03	16	<=0.12	<=0.015	1	2	NA	NA	NA	C-42T	NA
19027890	2019	DTU	Denmark	Denmark	Livestock	Pigs	Faeces	NA	1	DTU	NA	Microdilution	Microdilution	>64	2	4	<=0.03	<=4	<=0.015	<=2	<=1	4	<=0.25	>1024	<=8	8	<=0.25	16	<=0.06	1	2	<=0.03	8	<=0.12	<=0.015	1	4	NA	NA	NA	C-42T	NA
19028108	2019	DTU	Denmark	Denmark	Livestock	Pigs	Faeces	NA	1	DTU	NA	Microdilution	Microdilution	>64	2	4	<=0.03	<=4	<=0.015	>64	<=1	<=0.5	<=0.25	>1024	<=8	8	<=0.25	16	<=0.06	1	2	<=0.03	8	<=0.12	<=0.015	2	4	NA	NA	NA	C-42T	NA
19028110	2019	DTU	Denmark	Denmark	Livestock	Pigs	Faeces	NA	1	DTU	NA	Microdilution	Microdilution	>64	>4	1	<=0.03	<=4	<=0.015	<=2	<=1	<=0.5	>32	64	<=8	4	<=0.25	4	8	<=0.06	<=0.12	<=0.03	4	<=0.12	<=0.015	64	1	blaCTX-M-1	NA	NA	NA	NA
19028191	2019	DTU	Denmark	Denmark	Livestock	Cattle	Faeces	NA	1	DTU	NA	Microdilution	Microdilution	>64	>4	<=0.5	<=0.03	<=4	<=0.015	<=2	<=1	<=0.5	<=0.25	<=8	128	8	<=0.25	4	4	<=0.06	<=0.12	<=0.03	4	<=0.12	<=0.015	64	<=0.25	blaCTX-M-14	NA	NA	NA	NA
19028195	2019	DTU	Denmark	Denmark	Livestock	Cattle	Faeces	NA	1	DTU	NA	Microdilution	Microdilution	>64	2	4	<=0.03	<=4	<=0.015	64	<=1	<=0.5	<=0.25	>1024	<=8	4	<=0.25	16	<=0.06	1	2	<=0.03	4	<=0.12	<=0.015	2	4	NA	NA	NA	C-42T	NA
19028412	2019	DTU	Denmark	France	Livestock	Broiler meat	Meat	NA	1	DTU	NA	Microdilution	Microdilution	>64	2	8	<=0.03	>128	<=0.015	64	<=1	<=0.5	<=0.25	>1024	<=8	<=2	<=0.25	32	<=0.06	2	4	<=0.03	4	<=0.12	<=0.015	2	8	NA	NA	NA	C-42T	NA
19029247	2019	DTU	Denmark	Netherlands	Livestock	Beef	Meat	NA	1	DTU	NA	Microdilution	Microdilution	>64	>4	1	<=0.03	32	<=0.015	64	<=1	1	>32	16	128	8	<=0.25	4	4	<=0.06	<=0.12	<=0.03	4	<=0.12	<=0.015	>64	1	blaCTX-M-65	NA	NA	NA	NA
19029700	2019	DTU	Denmark	Denmark	Livestock	Cattle	Faeces	NA	1	DTU	NA	Microdilution	Microdilution	>64	2	4	<=0.03	<=4	<=0.015	<=2	<=1	2	<=0.25	<=8	<=8	8	<=0.25	16	<=0.06	1	2	<=0.03	8	<=0.12	<=0.015	1	4	NA	NA	NA	C-42T	NA
19029708	2019	DTU	Denmark	Denmark	Livestock	Broiler meat	Meat	NA	1	DTU	NA	Microdilution	Microdilution	>64	>4	4	<=0.03	<=4	<=0.015	32	<=1	<=0.5	<=0.25	>1024	<=8	4	<=0.25	4	8	<=0.06	<=0.12	<=0.03	8	<=0.12	<=0.015	>64	4	blaCTX-M-1	NA	NA	NA	NA
19029709	2019	DTU	Denmark	Denmark	Livestock	Broiler meat	Meat	NA	1	DTU	NA	Microdilution	Microdilution	>64	>4	>8	<=0.03	8	<=0.015	<=2	<=1	2	<=0.25	<=8	<=8	4	<=0.25	32	<=0.06	8	8	<=0.03	8	<=0.12	<=0.015	8	16	NA	NA	NA	blaCMY-2	NA
19030693	2019	DTU	Denmark	Germany	Livestock	Beef	Meat	NA	1	DTU	NA	Microdilution	Microdilution	>64	>4	8	<=0.03	>128	>8	>64	<=1	2	>32	>1024	<=8	8	<=0.25	8	32	<=0.06	<=0.12	<=0.03	8	<=0.12	<=0.015	>64	8	blaCTX-M-15	NA	NA	NA	NA
19030727	2019	DTU	Denmark	Denmark	Livestock	Pork	Meat	NA	1	DTU	NA	Microdilution	Microdilution	>64	2	4	<=0.03	<=4	<=0.015	<=2	<=1	<=0.5	<=0.25	16	<=8	8	<=0.25	32	<=0.06	1	4	<=0.03	4	<=0.12	<=0.015	2	4	NA	NA	NA	C-42T	NA
19030957	2019	DTU	Denmark	Denmark	Livestock	Pigs	Faeces	NA	1	DTU	NA	Microdilution	Microdilution	>64	2	4	<=0.03	<=4	<=0.015	>64	<=1	<=0.5	>32	>1024	<=8	8	<=0.25	32	<=0.06	1	4	<=0.03	4	<=0.12	<=0.015	2	4	NA	NA	NA	C-42T	NA
19030958	2019	DTU	Denmark	Denmark	Livestock	Pigs	Faeces	NA	1	DTU	NA	Microdilution	Microdilution	>64	>4	>8	<=0.03	<=4	<=0.015	4	<=1	<=0.5	<=0.25	<=8	<=8	16	<=0.25	>64	<=0.06	16	32	<=0.03	16	<=0.12	<=0.015	16	32	NA	NA	NA	blaCMY-2	NA
19031040	2019	DTU	Denmark	Germany	Livestock	Beef	Meat	NA	1	DTU	NA	Microdilution	Microdilution	>64	>4	2	<=0.03	>128	8	32	<=1	32	<=0.25	1024	>128	4	<=0.25	4	32	<=0.06	<=0.12	<=0.03	8	<=0.12	<=0.015	>64	2	blaCTX-M-1	NA	NA	NA	NA
19031066	2019	DTU	Denmark	Denmark	Livestock	Pork	Meat	NA	1	DTU	NA	Microdilution	Microdilution	>64	2	4	<=0.03	<=4	<=0.015	32	<=1	<=0.5	>32	>1024	<=8	8	<=0.25	32	<=0.06	1	4	<=0.03	8	<=0.12	<=0.015	2	4	NA	NA	NA	C-42T	NA
19031074	2019	DTU	Denmark	Netherlands	Livestock	Beef	Meat	NA	1	DTU	NA	Microdilution	Microdilution	>64	>4	8	<=0.03	>128	>8	>64	<=1	<=0.5	>32	>1024	<=8	8	<=0.25	8	8	<=0.06	<=0.12	<=0.03	8	<=0.12	<=0.015	>64	8	blaCTX-M-15	NA	NA	NA	NA
19031076	2019	DTU	Denmark	Denmark	Livestock	Beef	Meat	NA	1	DTU	NA	Microdilution	Microdilution	>64	1	4	<=0.03	<=4	<=0.015	<=2	<=1	<=0.5	<=0.25	16	<=8	4	<=0.25	16	<=0.06	1	2	<=0.03	4	<=0.12	<=0.015	2	4	NA	NA	NA	C-42T	NA
19031154	2019	DTU	Denmark	Denmark	Livestock	Pigs	Faeces	NA	1	DTU	NA	Microdilution	Microdilution	>64	2	4	<=0.03	<=4	<=0.015	<=2	<=1	1	<=0.25	>1024	<=8	8	<=0.25	16	<=0.06	1	2	<=0.03	8	<=0.12	<=0.015	1	4	NA	NA	NA	C-42T	NA
19032535	2019	DTU	Denmark	Denmark	Livestock	Pigs	Faeces	NA	1	DTU	NA	Microdilution	Microdilution	>64	1	2	<=0.03	<=4	<=0.015	<=2	<=1	<=0.5	<=0.25	16	<=8	4	<=0.25	16	<=0.06	1	2	<=0.03	4	<=0.12	<=0.015	1	4	NA	NA	NA	C-42T	NA
19032536	2019	DTU	Denmark	Denmark	Livestock	Pigs	Faeces	NA	1	DTU	NA	Microdilution	Microdilution	64	1	4	<=0.03	<=4	<=0.015	<=2	<=1	<=0.5	<=0.25	<=8	<=8	4	<=0.25	16	<=0.06	1	2	<=0.03	4	<=0.12	<=0.015	1	2	NA	NA	NA	C-42T	NA
19032537	2019	DTU	Denmark	Denmark	Livestock	Pigs	Faeces	NA	1	DTU	NA	Microdilution	Microdilution	>64	4	8	<=0.03	<=4	<=0.015	>64	<=1	<=0.5	>32	>1024	<=8	8	<=0.25	64	<=0.06	2	4	<=0.03	16	<=0.12	<=0.015	4	4	NA	NA	NA	C-42T	NA
19032541	2019	DTU	Denmark	Denmark	Livestock	Pigs	Faeces	NA	1	DTU	NA	Microdilution	Microdilution	>64	4	8	<=0.03	<=4	<=0.015	64	<=1	32	>32	>1024	<=8	8	<=0.25	32	<=0.06	2	4	<=0.03	16	<=0.12	<=0.015	4	8	NA	NA	NA	C-42T	NA
19033734	2019	DTU	Denmark	Denmark	Livestock	Pigs	Faeces	NA	1	DTU	NA	Microdilution	Microdilution	>64	>4	1	<=0.03	<=4	<=0.015	<=2	<=1	<=0.5	<=0.25	16	<=8	4	<=0.25	4	4	<=0.06	<=0.12	<=0.03	4	<=0.12	<=0.015	16	1	blaCTX-M-1	NA	NA	NA	NA
19034064	2019	DTU	Denmark	Denmark	Livestock	Pigs	Faeces	NA	1	DTU	NA	Microdilution	Microdilution	>64	>4	1	<=0.03	<=4	<=0.015	<=2	<=1	<=0.5	>32	>1024	<=8	4	<=0.25	4	8	<=0.06	<=0.12	<=0.03	4	<=0.12	<=0.015	>64	1	blaCTX-M-1	NA	NA	NA	NA
19034317	2019	DTU	Denmark	Denmark	Livestock	Pigs	Faeces	NA	1	DTU	NA	Microdilution	Microdilution	>64	2	4	<=0.03	<=4	<=0.015	<=2	<=1	1	<=0.25	<=8	<=8	8	<=0.25	16	<=0.06	1	2	<=0.03	8	<=0.12	<=0.015	1	4	NA	NA	NA	C-42T	NA
19034318	2019	DTU	Denmark	Denmark	Livestock	Pigs	Faeces	NA	1	DTU	NA	Microdilution	Microdilution	>64	4	8	<=0.03	<=4	<=0.015	<=2	<=1	<=0.5	1	16	<=8	4	<=0.25	32	<=0.06	2	8	<=0.03	16	<=0.12	<=0.015	4	8	NA	NA	NA	C-42T	NA
19034871	2019	DTU	Denmark	Denmark	Livestock	Beef	Meat	NA	1	DTU	NA	Microdilution	Microdilution	>64	2	4	<=0.03	<=4	<=0.015	>64	<=1	1	<=0.25	>1024	<=8	4	<=0.25	16	<=0.06	1	2	<=0.03	8	<=0.12	<=0.015	2	4	NA	NA	NA	C-42T	NA
19034927	2019	DTU	Denmark	Denmark	Livestock	Pigs	Faeces	NA	1	DTU	NA	Microdilution	Microdilution	>64	>4	2	<=0.03	<=4	<=0.015	>64	<=1	<=0.5	>32	>1024	>128	>64	<=0.25	8	16	<=0.06	<=0.12	<=0.03	16	<=0.12	<=0.015	>64	4	blaCTX-M-1	NA	NA	NA	NA
19034928	2019	DTU	Denmark	Denmark	Livestock	Pigs	Faeces	NA	1	DTU	NA	Microdilution	Microdilution	>64	>4	2	<=0.03	<=4	<=0.015	64	<=1	2	<=0.25	>1024	>128	>64	<=0.25	8	8	<=0.06	<=0.12	<=0.03	8	<=0.12	<=0.015	>64	1	blaCTX-M-14	NA	NA	NA	NA
19035083	2019	DTU	Denmark	Denmark	Livestock	Pigs	Faeces	NA	1	DTU	NA	Microdilution	Microdilution	>64	2	4	<=0.03	<=4	<=0.015	<=2	<=1	<=0.5	<=0.25	16	<=8	4	<=0.25	32	<=0.06	2	4	<=0.03	8	<=0.12	<=0.015	4	8	NA	NA	NA	C-42T	NA
19035428	2019	DTU	Denmark	Denmark	Livestock	Pigs	Faeces	NA	1	DTU	NA	Microdilution	Microdilution	>64	2	4	<=0.03	<=4	<=0.015	<=2	<=1	>32	>32	>1024	128	4	<=0.25	16	<=0.06	1	4	<=0.03	8	<=0.12	<=0.015	2	4	NA	NA	NA	C-42T	NA
19035430	2019	DTU	Denmark	Denmark	Livestock	Pigs	Faeces	NA	1	DTU	NA	Microdilution	Microdilution	>64	>4	>8	<=0.03	16	<=0.015	64	<=1	>32	<=0.25	32	<=8	8	<=0.25	2	>32	<=0.06	<=0.12	<=0.03	8	<=0.12	<=0.015	>64	16	blaCTX-M-55	NA	NA	NA	NA
19035433	2019	DTU	Denmark	Denmark	Livestock	Pigs	Faeces	NA	1	DTU	NA	Microdilution	Microdilution	>64	1	2	<=0.03	<=4	<=0.015	<=2	<=1	1	<=0.25	<=8	<=8	8	<=0.25	16	<=0.06	1	2	<=0.03	8	<=0.12	<=0.015	1	4	NA	NA	NA	C-42T	NA
19035436	2019	DTU	Denmark	Denmark	Livestock	Pigs	Faeces	NA	1	DTU	NA	Microdilution	Microdilution	>64	2	>8	<=0.03	<=4	<=0.015	<=2	<=1	1	<=0.25	16	<=8	8	<=0.25	64	<=0.06	2	4	<=0.03	8	<=0.12	<=0.015	4	8	NA	NA	NA	C-42T	NA
19035437	2019	DTU	Denmark	Denmark	Livestock	Pigs	Faeces	NA	1	DTU	NA	Microdilution	Microdilution	>64	2	>8	<=0.03	<=4	<=0.015	<=2	<=1	1	<=0.25	<=8	<=8	8	<=0.25	64	<=0.06	4	4	<=0.03	8	<=0.12	<=0.015	4	8	NA	NA	NA	C-42T	NA
19035438	2019	DTU	Denmark	Denmark	Livestock	Pigs	Faeces	NA	1	DTU	NA	Microdilution	Microdilution	>64	>4	2	<=0.03	<=4	<=0.015	<=2	<=1	<=0.5	>32	>1024	<=8	32	<=0.25	4	8	<=0.06	<=0.12	<=0.03	8	<=0.12	<=0.015	64	2	blaCTX-M-1	NA	NA	NA	NA
19035856	2019	DTU	Denmark	Denmark	Livestock	Pigs	Faeces	NA	1	DTU	NA	Microdilution	Microdilution	>64	2	8	<=0.03	<=4	<=0.015	64	<=1	1	>32	>1024	<=8	8	<=0.25	16	<=0.06	1	8	<=0.03	16	<=0.12	<=0.015	2	8	NA	NA	NA	C-42T	NA
19035857	2019	DTU	Denmark	Denmark	Livestock	Pigs	Faeces	NA	1	DTU	NA	Microdilution	Microdilution	>64	2	8	<=0.03	<=4	<=0.015	64	<=1	<=0.5	<=0.25	>1024	128	8	<=0.25	32	<=0.06	1	4	<=0.03	8	<=0.12	<=0.015	4	4	NA	NA	NA	C-42T	NA
19035991	2019	DTU	Denmark	France	Livestock	Broiler meat	Meat	NA	1	DTU	NA	Microdilution	Microdilution	>64	4	8	<=0.03	>128	<=0.015	>64	<=1	<=0.5	<=0.25	>1024	<=8	4	<=0.25	64	<=0.06	2	4	<=0.03	4	<=0.12	<=0.015	4	8	NA	NA	NA	C-42T	NA
19036014	2019	DTU	Denmark	Denmark	Livestock	Cattle	Faeces	NA	1	DTU	NA	Microdilution	Microdilution	>64	2	4	<=0.03	<=4	<=0.015	>64	<=1	2	<=0.25	>1024	<=8	8	<=0.25	16	<=0.06	1	4	<=0.03	8	<=0.12	<=0.015	2	4	NA	NA	NA	C-42T	NA
19036024	2019	DTU	Denmark	France	Livestock	Broiler meat	Meat	NA	1	DTU	NA	Microdilution	Microdilution	>64	4	>8	<=0.03	>128	<=0.015	>64	<=1	<=0.5	<=0.25	>1024	<=8	4	<=0.25	64	<=0.06	2	8	<=0.03	8	<=0.12	<=0.015	4	16	NA	NA	NA	C-42T	NA
19036025	2019	DTU	Denmark	France	Livestock	Broiler meat	Meat	NA	1	DTU	NA	Microdilution	Microdilution	>64	2	>8	<=0.03	>128	<=0.015	>64	<=1	1	<=0.25	>1024	<=8	4	<=0.25	64	<=0.06	2	8	<=0.03	4	<=0.12	<=0.015	4	8	NA	NA	NA	C-42T	NA
19036385	2019	DTU	Denmark	Denmark	Livestock	Cattle	Faeces	NA	1	DTU	NA	Microdilution	Microdilution	>64	1	1	<=0.03	<=4	<=0.015	<=2	<=1	1	<=0.25	<=8	<=8	4	<=0.25	16	<=0.06	1	1	<=0.03	8	<=0.12	<=0.015	1	1	NA	NA	NA	C-42T	NA
19036497	2019	DTU	Denmark	Denmark	Livestock	Cattle	Faeces	NA	1	DTU	NA	Microdilution	Microdilution	>64	>4	<=0.5	<=0.03	<=4	<=0.015	<=2	<=1	1	>32	>1024	<=8	8	<=0.25	2	1	<=0.06	<=0.12	<=0.03	4	<=0.12	<=0.015	>64	<=0.25	blaCTX-M-14	NA	NA	NA	NA
19036498	2019	DTU	Denmark	Denmark	Livestock	Cattle	Faeces	NA	1	DTU	NA	Microdilution	Microdilution	>64	4	8	<=0.03	<=4	<=0.015	<=2	<=1	<=0.5	<=0.25	<=8	<=8	8	<=0.25	32	<=0.06	2	4	<=0.03	8	<=0.12	<=0.015	4	16	NA	NA	NA	C-42T	NA
19037673	2019	DTU	Denmark	Denmark	Livestock	Pigs	Faeces	NA	1	DTU	NA	Microdilution	Microdilution	>64	4	4	<=0.03	<=4	<=0.015	>64	<=1	<=0.5	<=0.25	<=8	<=8	4	<=0.25	32	<=0.06	2	4	<=0.03	8	<=0.12	<=0.015	2	8	NA	NA	NA	C-42T	NA
19037675	2019	DTU	Denmark	Denmark	Livestock	Pigs	Faeces	NA	1	DTU	NA	Microdilution	Microdilution	>64	2	8	<=0.03	<=4	<=0.015	<=2	<=1	<=0.5	<=0.25	<=8	<=8	4	<=0.25	64	<=0.06	2	4	<=0.03	8	<=0.12	<=0.015	4	16	NA	NA	NA	C-42T	NA
19038848	2019	DTU	Denmark	Denmark	Livestock	Pigs	Faeces	NA	1	DTU	NA	Microdilution	Microdilution	>64	>4	1	<=0.03	<=4	<=0.015	>64	<=1	>32	<=0.25	<=8	<=8	>64	<=0.25	8	8	<=0.06	<=0.12	<=0.03	8	<=0.12	<=0.015	>64	1	blaCTX-M-14	NA	NA	NA	NA
19039901	2019	DTU	Denmark	Denmark	Livestock	Cattle	Faeces	NA	1	DTU	NA	Microdilution	Microdilution	>64	>4	<=0.5	<=0.03	<=4	<=0.015	<=2	<=1	>32	>32	>1024	128	8	<=0.25	2	2	<=0.06	<=0.12	<=0.03	4	<=0.12	<=0.015	16	<=0.25	blaCTX-M-14	NA	NA	NA	NA
19040827	2019	DTU	Denmark	Denmark	Livestock	Pork	Meat	NA	1	DTU	NA	Microdilution	Microdilution	>64	4	8	<=0.03	<=4	<=0.015	<=2	<=1	1	>32	>1024	<=8	4	<=0.25	32	<=0.06	2	8	<=0.03	4	<=0.12	<=0.015	4	8	NA	NA	NA	C-42T	NA
19041334	2019	DTU	Denmark	Denmark	Livestock	Pigs	Faeces	NA	1	DTU	NA	Microdilution	Microdilution	>64	2	8	<=0.03	<=4	<=0.015	64	<=1	1	>32	>1024	<=8	4	<=0.25	32	<=0.06	2	4	<=0.03	4	<=0.12	<=0.015	4	8	NA	NA	NA	C-42T	NA
19041417	2019	DTU	Denmark	Denmark	Livestock	Cattle	Faeces	NA	1	DTU	NA	Microdilution	Microdilution	>64	>4	1	<=0.03	<=4	<=0.015	<=2	<=1	1	<=0.25	>1024	<=8	8	<=0.25	4	8	<=0.06	<=0.12	<=0.03	4	<=0.12	<=0.015	>64	2	blaCTX-M-1	NA	NA	NA	NA
19041419	2019	DTU	Denmark	Denmark	Livestock	Cattle	Faeces	NA	1	DTU	NA	Microdilution	Microdilution	>64	1	4	<=0.03	<=4	<=0.015	>64	<=1	<=0.5	>32	>1024	<=8	4	<=0.25	16	<=0.06	1	2	<=0.03	8	<=0.12	<=0.015	2	4	NA	NA	NA	C-42T	NA
19041541	2019	DTU	Denmark	Denmark	Livestock	Pigs	Faeces	NA	1	DTU	NA	Microdilution	Microdilution	>64	2	4	<=0.03	<=4	<=0.015	<=2	<=1	<=0.5	<=0.25	<=8	<=8	4	<=0.25	16	<=0.06	1	2	<=0.03	8	<=0.12	<=0.015	2	4	NA	NA	NA	C-42T	NA
19042244	2019	DTU	Denmark	Denmark	Livestock	Cattle	Faeces	NA	1	DTU	NA	Microdilution	Microdilution	>64	1	2	<=0.03	<=4	<=0.015	<=2	<=1	2	<=0.25	<=8	<=8	8	<=0.25	16	<=0.06	<=0.06	2	<=0.03	4	<=0.12	<=0.015	1	2	NA	NA	NA	C-42T	NA
19042593	2019	DTU	Denmark	Denmark	Livestock	Cattle	Faeces	NA	1	DTU	NA	Microdilution	Microdilution	>64	>4	8	<=0.03	<=4	<=0.015	<=2	<=1	1	<=0.25	<=8	<=8	4	<=0.25	4	8	<=0.06	<=0.12	<=0.03	4	<=0.12	<=0.015	>64	8	blaCTX-M-15	NA	NA	NA	NA
19043462	2019	DTU	Denmark	Denmark	Livestock	Broiler meat	Meat	NA	1	DTU	NA	Microdilution	Microdilution	>64	1	2	<=0.03	<=4	<=0.015	32	<=1	1	<=0.25	>1024	<=8	8	<=0.25	2	16	<=0.06	<=0.12	<=0.03	4	<=0.12	<=0.015	>64	1	blaCTX-M-1	NA	NA	NA	NA
19043939	2019	DTU	Denmark	Denmark	Livestock	Cattle	Faeces	NA	1	DTU	NA	Microdilution	Microdilution	>64	>4	8	<=0.03	8	<=0.015	64	<=1	1	>32	>1024	<=8	8	<=0.25	4	16	<=0.06	<=0.12	<=0.03	8	<=0.12	<=0.015	>64	8	blaCTX-M-15	NA	NA	NA	NA
19044369	2019	DTU	Denmark	Netherlands	Livestock	Pork	Meat	NA	1	DTU	NA	Microdilution	Microdilution	>64	>4	1	<=0.03	<=4	<=0.015	<=2	<=1	<=0.5	>32	>1024	<=8	8	<=0.25	4	8	<=0.06	<=0.12	<=0.03	4	<=0.12	<=0.015	64	1	blaCTX-M-14	NA	NA	NA	NA
19044743	2019	DTU	Denmark	Denmark	Livestock	Beef	Meat	NA	1	DTU	NA	Microdilution	Microdilution	>64	2	2	<=0.03	<=4	<=0.015	<=2	<=1	<=0.5	>32	>1024	<=8	4	<=0.25	32	<=0.06	<=0.06	2	<=0.03	8	<=0.12	<=0.015	1	2	NA	NA	NA	T-32A	NA
19044810	2019	DTU	Denmark	Denmark	Livestock	Pigs	Faeces	NA	1	DTU	NA	Microdilution	Microdilution	>64	2	2	<=0.03	<=4	<=0.015	<=2	<=1	1	<=0.25	16	<=8	4	<=0.25	16	<=0.06	1	2	<=0.03	8	<=0.12	<=0.015	1	4	NA	NA	NA	C-42T	NA
19044811	2019	DTU	Denmark	Denmark	Livestock	Pigs	Faeces	NA	1	DTU	NA	Microdilution	Microdilution	>64	2	4	<=0.03	<=4	<=0.015	32	<=1	<=0.5	>32	>1024	128	4	<=0.25	32	<=0.06	1	2	<=0.03	4	<=0.12	<=0.015	2	4	NA	NA	NA	C-42T	NA
19044856	2019	DTU	Denmark	Netherlands	Livestock	Beef	Meat	NA	1	DTU	NA	Microdilution	Microdilution	>64	2	8	<=0.03	<=4	<=0.015	>64	<=1	1	<=0.25	16	<=8	8	<=0.25	32	<=0.06	2	8	<=0.03	16	<=0.12	<=0.015	4	8	NA	NA	NA	C-42T	NA
19044883	2019	DTU	Denmark	Denmark	Livestock	Pigs	Faeces	NA	1	DTU	NA	Microdilution	Microdilution	>64	2	4	<=0.03	<=4	<=0.015	<=2	<=1	<=0.5	>32	<=8	<=8	4	<=0.25	32	<=0.06	1	4	<=0.03	8	<=0.12	<=0.015	2	4	NA	NA	NA	C-42T	NA
19045127	2019	DTU	Denmark	Netherlands	Livestock	Beef	Meat	NA	1	DTU	NA	Microdilution	Microdilution	>64	>4	1	<=0.03	16	<=0.015	64	<=1	1	>32	<=8	128	8	<=0.25	4	4	<=0.06	<=0.12	<=0.03	8	<=0.12	<=0.015	>64	2	blaCTX-M-65	NA	NA	NA	NA
19045215	2019	DTU	Denmark	Denmark	Livestock	Cattle	Faeces	NA	1	DTU	NA	Microdilution	Microdilution	>64	>4	8	<=0.03	<=4	<=0.015	>64	<=1	2	>32	>1024	128	8	<=0.25	4	8	<=0.06	<=0.12	<=0.03	4	<=0.12	<=0.015	>64	8	blaCTX-M-15	NA	NA	NA	NA
19045249	2019	DTU	Denmark	Netherlands	Livestock	Beef	Meat	NA	1	DTU	NA	Microdilution	Microdilution	>64	>4	2	<=0.03	<=4	<=0.015	8	<=1	1	<=0.25	<=8	<=8	<=2	<=0.25	4	32	<=0.06	<=0.12	<=0.03	4	<=0.12	<=0.015	>64	2	blaCTX-M-1	NA	NA	NA	NA
19045758	2019	DTU	Denmark	Denmark	Livestock	Pork	Meat	NA	1	DTU	NA	Microdilution	Microdilution	>64	>4	>8	<=0.03	<=4	<=0.015	<=2	<=1	1	<=0.25	32	<=8	8	<=0.25	64	<=0.06	8	16	<=0.03	8	<=0.12	<=0.015	8	16	NA	NA	NA	blaCMY-2	NA
19046020	2019	DTU	Denmark	Denmark	Livestock	Pigs	Faeces	NA	1	DTU	NA	Microdilution	Microdilution	>64	4	8	<=0.03	<=4	<=0.015	<=2	<=1	<=0.5	>32	16	<=8	4	<=0.25	64	<=0.06	2	8	<=0.03	8	<=0.12	<=0.015	4	16	NA	NA	NA	C-42T	NA
19046330	2019	DTU	Denmark	Denmark	Livestock	Cattle	Faeces	NA	1	DTU	NA	Microdilution	Microdilution	>64	2	4	<=0.03	<=4	<=0.015	<=2	<=1	1	<=0.25	32	<=8	16	<=0.25	>64	<=0.06	1	4	<=0.03	8	<=0.12	<=0.015	2	8	NA	NA	NA	C-42T	NA
19047384	2019	DTU	Denmark	Denmark	Livestock	Pork	Meat	NA	1	DTU	NA	Microdilution	Microdilution	>64	4	8	<=0.03	<=4	<=0.015	<=2	<=1	<=0.5	<=0.25	<=8	<=8	4	<=0.25	64	<=0.06	2	4	<=0.03	4	<=0.12	<=0.015	4	8	NA	NA	NA	C-42T	NA
19048207	2019	DTU	Denmark	Denmark	Livestock	Pigs	Faeces	NA	1	DTU	NA	Microdilution	Microdilution	>64	>4	2	<=0.03	<=4	<=0.015	<=2	<=1	1	>32	<=8	<=8	8	<=0.25	4	8	<=0.06	<=0.12	<=0.03	8	<=0.12	<=0.015	>64	2	blaCTX-M-1	NA	NA	NA	NA
19048209	2019	DTU	Denmark	Denmark	Livestock	Pigs	Faeces	NA	1	DTU	NA	Microdilution	Microdilution	>64	4	8	<=0.03	<=4	<=0.015	64	<=1	1	>32	>1024	<=8	8	<=0.25	32	<=0.06	2	4	<=0.03	4	<=0.12	<=0.015	4	8	NA	NA	NA	C-42T	NA
19048531	2019	DTU	Denmark	France	Livestock	Broiler meat	Meat	NA	1	DTU	NA	Microdilution	Microdilution	>64	>4	8	<=0.03	32	<=0.015	>64	<=1	1	>32	>1024	<=8	8	<=0.25	4	8	<=0.06	<=0.12	<=0.03	8	<=0.12	<=0.015	>64	8	blaCTX-M-15	NA	NA	NA	NA
19048808	2019	DTU	Denmark	France	Livestock	Broiler meat	Meat	NA	1	DTU	NA	Microdilution	Microdilution	>64	2	8	<=0.03	>128	<=0.015	64	<=1	<=0.5	<=0.25	>1024	<=8	4	<=0.25	32	<=0.06	1	4	<=0.03	4	<=0.12	<=0.015	2	8	NA	NA	NA	C-42T	NA
19048812	2019	DTU	Denmark	Denmark	Livestock	Broiler meat	Meat	NA	1	DTU	NA	Microdilution	Microdilution	>64	1	1	<=0.03	128	<=0.015	<=2	<=1	<=0.5	<=0.25	<=8	<=8	8	<=0.25	32	<=0.06	1	1	<=0.03	8	<=0.12	<=0.015	2	2	NA	NA	NA	C-42T	NA
19049599	2019	DTU	Denmark	Netherlands	Livestock	Pork	Meat	NA	1	DTU	NA	Microdilution	Microdilution	>64	2	4	<=0.03	<=4	<=0.015	<=2	<=1	1	<=0.25	<=8	<=8	4	<=0.25	32	<=0.06	2	4	<=0.03	4	<=0.12	<=0.015	2	4	NA	NA	NA	C-42T	NA
19049600	2019	DTU	Denmark	Netherlands	Livestock	Pork	Meat	NA	1	DTU	NA	Microdilution	Microdilution	>64	>4	1	<=0.03	<=4	<=0.015	<=2	<=1	2	<=0.25	<=8	<=8	4	<=0.25	4	8	<=0.06	<=0.12	<=0.03	4	<=0.12	<=0.015	>64	1	blaCTX-M-1	NA	NA	NA	NA
19049965	2019	DTU	Denmark	Denmark	Livestock	Pigs	Faeces	NA	1	DTU	NA	Microdilution	Microdilution	>64	2	4	<=0.03	<=4	<=0.015	32	<=1	<=0.5	>32	>1024	>128	8	<=0.25	32	<=0.06	1	4	<=0.03	4	<=0.12	<=0.015	2	4	NA	NA	NA	C-42T	NA
19049985	2019	DTU	Denmark	Denmark	Livestock	Pigs	Faeces	NA	1	DTU	NA	Microdilution	Microdilution	>64	2	8	<=0.03	<=4	<=0.015	<=2	<=1	<=0.5	>32	16	<=8	8	<=0.25	32	<=0.06	2	8	<=0.03	8	<=0.12	<=0.015	2	8	NA	NA	NA	C-42T	NA
19049986	2019	DTU	Denmark	Denmark	Livestock	Pigs	Faeces	NA	1	DTU	NA	Microdilution	Microdilution	>64	2	4	<=0.03	<=4	<=0.015	<=2	<=1	<=0.5	<=0.25	<=8	<=8	4	<=0.25	32	<=0.06	1	2	<=0.03	4	<=0.12	<=0.015	2	4	NA	NA	NA	C-42T	NA
19049987	2019	DTU	Denmark	Denmark	Livestock	Pigs	Faeces	NA	1	DTU	NA	Microdilution	Microdilution	>64	2	8	<=0.03	<=4	<=0.015	<=2	<=1	<=0.5	>32	16	<=8	8	<=0.25	16	<=0.06	1	4	<=0.03	8	<=0.12	<=0.015	2	8	NA	NA	NA	C-42T	NA
19051111	2019	DTU	Denmark	Netherlands	Livestock	Pork	Meat	NA	1	DTU	NA	Microdilution	Microdilution	>64	>4	1	<=0.03	<=4	<=0.015	64	<=1	1	>32	>1024	<=8	8	<=0.25	2	8	<=0.06	<=0.12	<=0.03	8	<=0.12	<=0.015	64	1	blaCTX-M-1	NA	NA	NA	NA
19051751	2019	DTU	Denmark	Denmark	Livestock	Pork	Meat	NA	1	DTU	NA	Microdilution	Microdilution	>64	2	8	<=0.03	<=4	<=0.015	<=2	<=1	<=0.5	<=0.25	<=8	<=8	4	<=0.25	32	<=0.06	2	4	<=0.03	8	<=0.12	<=0.015	4	8	NA	NA	NA	C-42T	NA
19053097	2019	DTU	Denmark	Denmark	Livestock	Pigs	Faeces	NA	1	DTU	NA	Microdilution	Microdilution	>64	>4	2	<=0.03	<=4	<=0.015	>64	<=1	1	<=0.25	<=8	<=8	8	<=0.25	8	8	<=0.06	<=0.12	<=0.03	8	<=0.12	<=0.015	64	2	blaCTX-M-1	NA	NA	NA	NA
19053973	2019	DTU	Denmark	Netherlands	Livestock	Pork	Meat	NA	1	DTU	NA	Microdilution	Microdilution	>64	>4	2	<=0.03	<=4	<=0.015	>64	<=1	>32	<=0.25	32	<=8	4	<=0.25	2	32	<=0.06	<=0.12	<=0.03	4	<=0.12	<=0.015	>64	1	blaCTX-M-1	NA	NA	NA	NA
19054836	2019	DTU	Denmark	Denmark	Livestock	Cattle	Faeces	NA	1	DTU	NA	Microdilution	Microdilution	>64	>4	2	<=0.03	<=4	<=0.015	64	<=1	<=0.5	>32	>1024	<=8	4	<=0.25	16	32	<=0.06	<=0.12	<=0.03	4	<=0.12	<=0.015	>64	4	blaCTX-M-2	NA	NA	NA	NA
19054961	2019	DTU	Denmark	Denmark	Livestock	Pork	Meat	NA	1	DTU	NA	Microdilution	Microdilution	>64	>4	2	<=0.03	8	<=0.015	64	<=1	<=0.5	>32	>1024	<=8	4	<=0.25	8	32	<=0.06	<=0.12	<=0.03	4	<=0.12	<=0.015	>64	4	blaCTX-M-1	NA	NA	NA	NA
19055073	2019	DTU	Denmark	Denmark	Livestock	Broiler meat	Meat	NA	1	DTU	NA	Microdilution	Microdilution	>64	>4	1	<=0.03	<=4	<=0.015	<=2	2	2	<=0.25	<=8	<=8	4	<=0.25	4	16	<=0.06	<=0.12	<=0.03	8	<=0.12	<=0.015	64	1	blaCTX-M-1	NA	NA	NA	NA
19055074	2019	DTU	Denmark	Denmark	Livestock	Broiler meat	Meat	NA	1	DTU	NA	Microdilution	Microdilution	>64	>4	2	<=0.03	<=4	<=0.015	4	<=1	1	<=0.25	>1024	<=8	8	<=0.25	4	8	<=0.06	<=0.12	<=0.03	4	<=0.12	<=0.015	64	1	blaCTX-M-1	NA	NA	NA	NA
19055501	2019	DTU	Denmark	Denmark	Livestock	Pigs	Faeces	NA	1	DTU	NA	Microdilution	Microdilution	>64	2	4	<=0.03	<=4	<=0.015	<=2	<=1	1	<=0.25	<=8	<=8	4	<=0.25	32	<=0.06	1	4	<=0.03	8	<=0.12	<=0.015	2	4	NA	NA	NA	C-42T	NA
20007620	2020	DTU	Denmark	France	Livestock	Broiler meat	Meat	NA	1	DTU	NA	Microdilution	Microdilution	>64	4	8	<=0.03	64	<=0.015	32	<=1	<=0.5	>32	>1024	<=8	4	<=0.25	32	<=0.06	4	4	<=0.03	4	<=0.12	<=0.015	4	8	NA	blaTEM-1C	NA	blaCMY-2	NA
20007929	2020	DTU	Denmark	Denmark	Livestock	Broiler meat	Meat	NA	1	DTU	NA	Microdilution	Microdilution	>64	2	2	<=0.03	64	<=0.015	<=2	<=1	<=0.5	<=0.25	<=8	<=8	8	<=0.25	64	<=0.06	2	1	<=0.03	8	<=0.12	<=0.015	2	2	NA	NA	NA	C-42T	NA
20011211	2020	DTU	Denmark	Denmark	Livestock	Broiler meat	Meat	NA	1	DTU	NA	Microdilution	Microdilution	>64	4	8	<=0.03	<=4	<=0.015	<=2	<=1	<=0.5	<=0.25	<=8	<=8	4	<=0.25	32	<=0.06	4	4	<=0.03	4	<=0.12	<=0.015	4	16	NA	NA	NA	blaCMY-2	NA
20011215	2020	DTU	Denmark	Denmark	Livestock	Broiler meat	Meat	NA	1	DTU	NA	Microdilution	Microdilution	>64	>4	>8	<=0.03	<=4	<=0.015	<=2	<=1	2	<=0.25	<=8	<=8	8	<=0.25	>64	<=0.06	8	16	<=0.03	8	<=0.12	<=0.015	8	16	NA	NA	NA	blaCMY-2	NA
20011267	2020	DTU	Denmark	Denmark	Livestock	Broiler meat	Meat	NA	1	DTU	NA	Microdilution	Microdilution	>64	2	4	<=0.03	64	<=0.015	>64	<=1	<=0.5	<=0.25	<=8	16	16	<=0.25	32	<=0.06	1	2	<=0.03	8	<=0.12	<=0.015	2	2	NA	blaTEM-1B	NA	C-42T	NA
20011335	2020	DTU	Denmark	Litauen	Livestock	Broiler meat	Meat	NA	1	DTU	NA	Microdilution	Microdilution	>64	>4	>8	<=0.03	>128	1	>64	<=1	2	>32	>1024	32	8	<=0.25	8	<=0.06	<=0.06	<=0.12	<=0.03	4	<=0.12	<=0.015	8	32	NA	blaTEM-1B	blaSHV-12	NA	NA
20011349	2020	DTU	Denmark	Litauen	Livestock	Broiler meat	Meat	NA	1	DTU	NA	Microdilution	Microdilution	>64	>4	2	<=0.03	>128	1	32	<=1	1	>32	>1024	128	8	<=0.25	8	32	<=0.06	<=0.12	<=0.03	8	<=0.12	<=0.015	>64	2	blaCTX-M-1	NA	NA	NA	NA
20016831	2020	DTU	Denmark	Denmark	Livestock	Broiler_chickens	Faeces	NA	1	DTU	NA	Microdilution	Microdilution	>64	>4	1	<=0.03	<=4	<=0.015	<=2	2	<=0.5	<=0.25	>1024	<=8	8	<=0.25	2	8	<=0.06	<=0.12	<=0.03	8	<=0.12	<=0.015	64	2	blaCTX-M-1	NA	NA	NA	NA
20019683	2020	DTU	Denmark	Denmark	Livestock	Broiler meat	Meat	NA	1	DTU	NA	Microdilution	Microdilution	>64	>4	8	<=0.03	<=4	<=0.015	<=2	2	<=0.5	>32	>1024	<=8	4	<=0.25	32	<=0.06	4	4	<=0.03	8	<=0.12	<=0.015	8	16	NA	NA	NA	blaCMY-2	NA
20021645	2020	DTU	Denmark	Litauen	Livestock	Broiler meat	Meat	NA	1	DTU	NA	Microdilution	Microdilution	>64	>4	4	<=0.03	8	<=0.015	64	2	<=0.5	>32	>1024	128	8	<=0.25	8	32	<=0.06	<=0.12	<=0.03	8	<=0.12	<=0.015	>64	4	blaCTX-M-1	NA	NA	NA	NA
20023938	2020	DTU	Denmark	Denmark	Livestock	Broiler_chickens	Faeces	NA	1	DTU	NA	Microdilution	Microdilution	>64	2	2	<=0.03	128	<=0.015	4	<=1	<=0.5	<=0.25	<=8	16	16	<=0.25	32	<=0.06	1	2	<=0.03	16	<=0.12	<=0.015	2	4	NA	NA	NA	C-42T	NA
20023939	2020	DTU	Denmark	Denmark	Livestock	Broiler_chickens	Faeces	NA	1	DTU	NA	Microdilution	Microdilution	>64	4	>8	<=0.03	>128	8	32	<=1	32	>32	>1024	32	4	<=0.25	2	<=0.06	<=0.06	<=0.12	<=0.03	8	<=0.12	<=0.015	4	16	NA	NA	blaSHV-12	NA	NA
20023940	2020	DTU	Denmark	Denmark	Livestock	Broiler_chickens	Faeces	NA	1	DTU	NA	Microdilution	Microdilution	>64	2	2	<=0.03	64	<=0.015	<=2	<=1	<=0.5	<=0.25	<=8	<=8	8	<=0.25	64	<=0.06	1	2	<=0.03	8	<=0.12	<=0.015	2	2	NA	blaTEM-1B	NA	C-42T	NA
20024367	2020	DTU	Denmark	Denmark	Livestock	Broiler_chickens	Faeces	NA	1	DTU	NA	Microdilution	Microdilution	>64	>4	>8	<=0.03	8	<=0.015	4	<=1	<=0.5	>32	<=8	<=8	>64	<=0.25	>64	<=0.06	8	32	<=0.03	4	<=0.12	<=0.015	8	32	NA	NA	NA	DHA-1	NA
20027748	2020	DTU	Denmark	Denmark	Livestock	Broiler_chickens	Faeces	NA	1	DTU	NA	Microdilution	Microdilution	>64	>4	2	<=0.03	>128	>8	4	2	1	<=0.25	<=8	<=8	16	<=0.25	8	16	<=0.06	<=0.12	<=0.03	8	<=0.12	<=0.015	64	2	blaCTX-M-14	NA	NA	NA	NA
20038574	2020	DTU	Denmark	Denmark	Livestock	Broiler_chickens	Faeces	NA	1	DTU	NA	Microdilution	Microdilution	>64	2	4	<=0.03	128	<=0.015	<=2	<=1	<=0.5	<=0.25	<=8	16	16	<=0.25	32	<=0.06	1	2	<=0.03	8	<=0.12	<=0.015	2	4	NA	NA	NA	C-42T	NA
20042982	2020	DTU	Denmark	France	Livestock	Broiler meat	Meat	NA	1	DTU	NA	Microdilution	Microdilution	>64	>4	2	<=0.03	<=4	<=0.015	>64	<=1	<=0.5	<=0.25	>1024	<=8	4	<=0.25	4	4	<=0.06	<=0.12	<=0.03	4	<=0.12	<=0.015	64	4	blaCTX-M-32	NA	NA	NA	NA
20047164	2020	DTU	Denmark	France	Livestock	Broiler meat	Meat	NA	1	DTU	NA	Microdilution	Microdilution	>64	>4	2	<=0.03	<=4	<=0.015	<=2	<=1	1	<=0.25	16	<=8	<=2	<=0.25	4	8	<=0.06	<=0.12	<=0.03	4	<=0.12	<=0.015	64	2	blaCTX-M-1	NA	NA	NA	NA
20047170	2020	DTU	Denmark	Denmark	Livestock	Broiler meat	Meat	NA	1	DTU	NA	Microdilution	Microdilution	>64	1	4	<=0.03	128	<=0.015	<=2	<=1	1	<=0.25	<=8	<=8	8	<=0.25	4	<=0.06	<=0.06	<=0.12	<=0.03	8	<=0.12	<=0.015	2	2	NA	blaTEM-52B	NA	NA	NA
20047173	2020	DTU	Denmark	Denmark	Livestock	Broiler meat	Meat	NA	1	DTU	NA	Microdilution	Microdilution	>64	2	8	<=0.03	>128	8	64	<=1	>32	>32	>1024	32	4	<=0.25	2	<=0.06	<=0.06	<=0.12	<=0.03	8	<=0.12	<=0.015	4	8	NA	NA	blaSHV-12	NA	NA
20047176	2020	DTU	Denmark	Denmark	Livestock	Broiler meat	Meat	NA	1	DTU	NA	Microdilution	Microdilution	>64	1	2	<=0.03	128	<=0.015	<=2	<=1	<=0.5	<=0.25	<=8	<=8	8	<=0.25	4	<=0.06	<=0.06	<=0.12	<=0.03	8	<=0.12	<=0.015	2	2	NA	blaTEM-52B	NA	NA	NA
20048301	2020	DTU	Denmark	Litauen	Livestock	Broiler meat	Meat	NA	1	DTU	NA	Microdilution	Microdilution	>64	>4	8	<=0.03	<=4	<=0.015	>64	<=1	<=0.5	<=0.25	>1024	64	8	<=0.25	8	2	<=0.06	<=0.12	<=0.03	8	<=0.12	<=0.015	16	8	NA	blaTEM-52C	NA	NA	NA
20048723	2020	DTU	Denmark	Denmark	Livestock	Broiler_chickens	Faeces	NA	1	DTU	NA	Microdilution	Microdilution	>64	2	2	<=0.03	128	<=0.015	>64	2	1	<=0.25	<=8	<=8	16	<=0.25	32	<=0.06	1	2	<=0.03	16	<=0.12	<=0.015	1	2	NA	blaTEM-1B	NA	C-42T	NA
20049875	2020	DTU	Denmark	Poland	Livestock	Broiler meat	Meat	NA	1	DTU	NA	Microdilution	Microdilution	>64	>4	>8	<=0.03	<=4	<=0.015	>64	<=1	<=0.5	>32	>1024	<=8	8	1	8	>32	<=0.06	<=0.12	<=0.03	8	<=0.12	<=0.015	>64	16	blaCTX-M-55	blaTEM-1B	NA	NA	NA
008/EC	2015	INIAV	Portugal	Portugal	Livestock	Cattle	Other	Cecal contents	1	NA	ERS 1801949	Others (specify in next column)	Agar dilution Panel 1 and microdilution Panel 2	>64	>4	8	<=0.03	<=4	0.03	>64	<=1	<=0.5	>32	>1024	<=8	8	1	4	>32	<=0.06	0.25	0.06	16	0.25	<=0.015	>64	8	blaCTX-M-32	NA	NA	NA	NA
09211EC	2014	INIAV	Portugal	Portugal	Livestock	Broiler_chickens	Other	Cecal contents	0	NA	NA	Others (specify in next column)	Agar dilution	>64	1	8	<=0.03	>128	8	>64	<=1	2	>32	>1024	<=8	8	1	>64	0.25	2	4	<=0.03	4	<=0.12	<=0.015	4	8	NA	blaTEM-1	NA	NA	Mutations on chromossomic AmpC promotor
1_1_1047	2016	VRI_CZ	Czech Republic	Czech Republic	Livestock	Laying_hens	Other	NA	NA	NA	NA	Microdilution	NA	R	R	NA	NA	NA	NA	NA	NA	NA	NA	NA	NA	NA	NA	NA	NA	NA	NA	NA	NA	NA	NA	NA	NA	NA	NA	NA	NA	NA
1_19_4483	2015	VRI_CZ	Czech Republic	Czech Republic	Livestock	Cattle	Other	NA	NA	NA	NA	Microdilution	NA	R	R	NA	NA	NA	NA	NA	NA	NA	NA	NA	NA	NA	NA	NA	NA	NA	NA	NA	NA	NA	NA	NA	NA	NA	NA	NA	NA	NA
1_28_4607x4706	2015	VRI_CZ	Czech Republic	Czech Republic	Livestock	Laying_hens	Other	NA	NA	NA	NA	Microdilution	NA	R	R	NA	NA	NA	NA	NA	NA	NA	NA	NA	NA	NA	NA	NA	NA	NA	NA	NA	NA	NA	NA	NA	NA	NA	NA	NA	NA	NA
1_32_4765B;13_79_4765B	2015	VRI_CZ	Czech Republic	Czech Republic	Livestock	Cattle	Other	NA	NA	NA	NA	Microdilution	NA	R	R	NA	NA	NA	NA	NA	NA	NA	NA	NA	NA	NA	NA	NA	NA	NA	NA	NA	NA	NA	NA	NA	NA	NA	NA	NA	NA	NA
10_60_16267	2016	VRI_CZ	Czech Republic	Czech Republic	Livestock	Laying_hens	Other	NA	NA	NA	NA	Microdilution	NA	R	R	NA	NA	NA	NA	NA	NA	NA	NA	NA	NA	NA	NA	NA	NA	NA	NA	NA	NA	NA	NA	NA	NA	NA	NA	NA	NA	NA
10_7_15841	2016	VRI_CZ	Czech Republic	Czech Republic	Livestock	Laying_hens	Other	NA	NA	NA	NA	Microdilution	NA	R	R	NA	NA	NA	NA	NA	NA	NA	NA	NA	NA	NA	NA	NA	NA	NA	NA	NA	NA	NA	NA	NA	NA	NA	NA	NA	NA	NA
10129/ECX	2019	INIAV	Portugal	Portugal	Livestock	Pigs	Other	Cecal contents	1	NA	NA	Microdilution	NA	>64	4	1	<=0.03	>128	8	64	8	>32	>32	>1024	128	64	0.5	4	16	<=0.06	<=0.12	0.06	8	0.25	<=0.015	64	1	NA	NA	NA	NA	NA
10599EC	2014	INIAV	Portugal	Portugal	Livestock	Turkeys	Other	Cecal contents	0	NA	NA	Others (specify in next column)	Agar dilution	>64	4	>8	<=0.03	<=4	<=0.015	64	<=1	1	<=0.25	>1024	32	4	0.5	4	1	<=0.06	<=0.12	<=0.03	4	<=0.12	<=0.015	16	32	NA	NA	blaSHV-12	NA	NA
10908EC	2014	INIAV	Portugal	Portugal	Livestock	Broiler_chickens	Other	Cecal contents	0	NA	NA	Others (specify in next column)	Agar dilution	>64	1	4	<=0.03	>128	8	>64	<=1	32	>32	>1024	<=8	16	0.5	8	2	<=0.06	<=0.12	<=0.03	4	<=0.12	<=0.015	16	32	NA	NA	NA	NA	blaESAC
11_11_17142	2016	VRI_CZ	Czech Republic	Czech Republic	Livestock	Laying_hens	Other	NA	NA	NA	NA	Microdilution	NA	R	R	NA	NA	NA	NA	NA	NA	NA	NA	NA	NA	NA	NA	NA	NA	NA	NA	NA	NA	NA	NA	NA	NA	NA	NA	NA	NA	NA
11_76_18072	2015	VRI_CZ	Czech Republic	Czech Republic	Livestock	Laying_hens	Other	NA	NA	NA	NA	Microdilution	NA	R	R	NA	NA	NA	NA	NA	NA	NA	NA	NA	NA	NA	NA	NA	NA	NA	NA	NA	NA	NA	NA	NA	NA	NA	NA	NA	NA	NA
11396/ECX	2019	INIAV	Portugal	Portugal	Livestock	Pigs	Other	Cecal contents	1	NA	NA	Microdilution	NA	>64	>4	2	<=0.03	8	0.12	64	<=1	<=0.5	>32	>1024	>128	8	0.5	4	8	<=0.06	0.25	<=0.03	8	0.25	<=0.015	>64	4	blaCTX-M-1	NA	NA	NA	NA
12_78_18928	2016	VRI_CZ	Czech Republic	Czech Republic	Livestock	Laying_hens	Other	NA	NA	NA	NA	Microdilution	NA	R	R	NA	NA	NA	NA	NA	NA	NA	NA	NA	NA	NA	NA	NA	NA	NA	NA	NA	NA	NA	NA	NA	NA	NA	NA	NA	NA	NA
13_149B_CTX3_190718_1850_mra.fasta.contigs.fasta	2013	PIWet	Poland	Poland	Wild_animals	Other_wild_mammals_not_rumints	Faeces	NA	1	PIWet	0361_19	NA	NA	NA	NA	NA	NA	NA	NA	NA	NA	NA	NA	NA	NA	NA	NA	NA	NA	NA	NA	NA	NA	NA	NA	NA	NA	blaCTX-M-1	blaTEM-1B	NA	NA	NA
13_176B_CTX1_190718_1846_mra.fasta.contigs.fasta	2013	PIWet	Poland	Poland	Pets	Reptiles_skes_turtles_lizards	Faeces	NA	1	PIWet	0356_19	NA	NA	NA	NA	NA	NA	NA	NA	NA	NA	NA	NA	NA	NA	NA	NA	NA	NA	NA	NA	NA	NA	NA	NA	NA	NA	NA	blaTEM-1B	NA	blaCMY-2	NA
13_176B_CTX2_190718_1845_mra.fasta.contigs.fasta	2013	PIWet	Poland	Poland	Pets	Reptiles_skes_turtles_lizards	Faeces	NA	NA	PIWet	0355_19	NA	NA	NA	NA	NA	NA	NA	NA	NA	NA	NA	NA	NA	NA	NA	NA	NA	NA	NA	NA	NA	NA	NA	NA	NA	NA	blaCTX-M-1	NA	NA	NA	NA
13059EC	2014	INIAV	Portugal	Portugal	Livestock	Broiler_chickens	Other	Cecal contents	0	NA	NA	Others (specify in next column)	Agar dilution	>64	1	>8	<=0.03	>128	8	>64	<=1	<=0.5	>32	>1024	128	8	1	8	2	<=0.06	<=0.12	0.06	4	<=0.12	<=0.015	4	64	NA	NA	blaSHV-12	NA	NA
13072EC	2014	INIAV	Portugal	Portugal	Livestock	Broiler_chickens	Other	Cecal contents	1	NA	MCBU01000000	Others (specify in next column)	Agar dilution	>64	>4	1	<=0.03	>128	2	32	<=1	1	>32	>1024	<=8	<=2	0.5	8	4	<=0.06	<=0.12	<=0.03	4	<=0.12	<=0.015	8	1	blaCTX-M-166	NA	NA	NA	NA
13233/ECX	2015	INIAV	Portugal	Portugal	Livestock	Cattle	Other	Cecal contents	1	NA	ERS 1801950	Others (specify in next column)	Agar dilution Panel 1 and microdilution Panel 2	>64	>4	>8	<=0.03	>128	8	>64	<=1	<=0.5	>32	>1024	>128	64	0.5	4	>32	<=0.06	<=0.12	<=0.03	8	<=0.12	<=0.015	>64	16	blaCTX-M-32	blaTEM-1	NA	NA	NA
13456EC	2014	INIAV	Portugal	Portugal	Livestock	Broiler_chickens	Other	Cecal contents	0	NA	NA	Others (specify in next column)	Agar dilution	>64	2	>8	<=0.03	<=4	<=0.015	<=2	<=1	<=0.5	0.5	16	<=8	4	<=0.25	8	1	<=0.06	<=0.12	<=0.03	4	<=0.12	<=0.015	2	32	NA	NA	blaSHV-12	NA	NA
13703/ECX	2015	INIAV	Portugal	Portugal	Livestock	Pigs	Other	Cecal contents	1	NA	ERS 1801949	Others (specify in next column)	Agar dilution Panel 1 and microdilution Panel 2	>64	>4	2	<=0.03	>128	>8	>64	16	16	>32	>1024	128	>64	0.5	8	32	<=0.06	<=0.12	<=0.03	4	0.25	0.03	64	2	blaCTX-M-32	NA	NA	NA	NA
14_14_17863	2015	VRI_CZ	Czech Republic	Czech Republic	Livestock	Laying_hens	Other	NA	NA	NA	NA	Microdilution	NA	R	R	NA	NA	NA	NA	NA	NA	NA	NA	NA	NA	NA	NA	NA	NA	NA	NA	NA	NA	NA	NA	NA	NA	NA	NA	NA	NA	NA
14_22_15135	2015	VRI_CZ	Czech Republic	Czech Republic	Livestock	Laying_hens	Other	NA	NA	NA	NA	Microdilution	NA	R	R	NA	NA	NA	NA	NA	NA	NA	NA	NA	NA	NA	NA	NA	NA	NA	NA	NA	NA	NA	NA	NA	NA	NA	NA	NA	NA	NA
14_30	2016	VRI_CZ	Czech Republic	Czech Republic	Livestock	Pigs	Other	NA	NA	NA	NA	Microdilution	NA	R	R	NA	NA	NA	NA	NA	NA	NA	NA	NA	NA	NA	NA	NA	NA	NA	NA	NA	NA	NA	NA	NA	NA	NA	NA	NA	NA	NA
14_33_14953	2015	VRI_CZ	Czech Republic	Czech Republic	Livestock	Laying_hens	Other	NA	NA	NA	NA	Microdilution	NA	R	R	NA	NA	NA	NA	NA	NA	NA	NA	NA	NA	NA	NA	NA	NA	NA	NA	NA	NA	NA	NA	NA	NA	NA	NA	NA	NA	NA
14_68_12514	2015	VRI_CZ	Czech Republic	Czech Republic	Livestock	Laying_hens	Other	NA	NA	NA	NA	Microdilution	NA	R	R	NA	NA	NA	NA	NA	NA	NA	NA	NA	NA	NA	NA	NA	NA	NA	NA	NA	NA	NA	NA	NA	NA	NA	NA	NA	NA	NA
14_69_11577	2015	VRI_CZ	Czech Republic	Czech Republic	Livestock	Laying_hens	Other	NA	NA	NA	NA	Microdilution	NA	R	R	NA	NA	NA	NA	NA	NA	NA	NA	NA	NA	NA	NA	NA	NA	NA	NA	NA	NA	NA	NA	NA	NA	NA	NA	NA	NA	NA
14_9	2016	VRI_CZ	Czech Republic	Czech Republic	Livestock	Laying_hens	Other	NA	NA	NA	NA	Microdilution	NA	R	R	NA	NA	NA	NA	NA	NA	NA	NA	NA	NA	NA	NA	NA	NA	NA	NA	NA	NA	NA	NA	NA	NA	NA	NA	NA	NA	NA
14966EC	2014	INIAV	Portugal	Portugal	Livestock	Broiler_chickens	Other	Cecal contents	0	NA	NA	Others (specify in next column)	Agar dilution	>64	2	>8	<=0.03	128	0.25	<=2	<=1	<=0.5	<=0.25	<=8	<=8	8	<=0.25	8	2	<=0.06	0.25	<=0.03	4	<=0.12	<=0.015	16	64	NA	NA	blaSHV-12	NA	NA
14968EC	2014	INIAV	Portugal	Portugal	Livestock	Broiler_chickens	Other	Cecal contents	0	NA	NA	Others (specify in next column)	Agar dilution	>64	>4	4	<=0.03	>128	8	>64	<=1	1	0.5	>1024	<=8	4	1	4	>32	0.125	0.25	<=0.03	4	<=0.12	<=0.015	>64	16	blaCTX-M-32	NA	NA	NA	NA
15_11_9303	2015	VRI_CZ	Czech Republic	Czech Republic	Livestock	Laying_hens	Other	NA	NA	NA	NA	Microdilution	NA	R	R	NA	NA	NA	NA	NA	NA	NA	NA	NA	NA	NA	NA	NA	NA	NA	NA	NA	NA	NA	NA	NA	NA	NA	NA	NA	NA	NA
15_71_9557	2015	VRI_CZ	Czech Republic	Czech Republic	Livestock	Laying_hens	Other	NA	NA	NA	NA	Microdilution	NA	R	R	NA	NA	NA	NA	NA	NA	NA	NA	NA	NA	NA	NA	NA	NA	NA	NA	NA	NA	NA	NA	NA	NA	NA	NA	NA	NA	NA
15_76_4917A	2015	VRI_CZ	Czech Republic	Czech Republic	Livestock	Pigs	Other	NA	NA	NA	NA	Microdilution	NA	R	R	NA	NA	NA	NA	NA	NA	NA	NA	NA	NA	NA	NA	NA	NA	NA	NA	NA	NA	NA	NA	NA	NA	NA	NA	NA	NA	NA
15015EC	2014	INIAV	Portugal	Portugal	Livestock	Broiler_chickens	Other	Cecal contents	0	NA	NA	Others (specify in next column)	Agar dilution	>64	1	8	<=0.03	>128	4	64	<=1	<=0.5	>32	>1024	32	8	<=0.25	8	2	<=0.06	<=0.12	<=0.03	4	<=0.12	<=0.015	16	32	NA	blaTEM-1	blaSHV-12	NA	NA
15211EC	2014	INIAV	Portugal	Portugal	Livestock	Broiler_chickens	Other	Cecal contents	0	NA	NA	Others (specify in next column)	Agar dilution	>64	>4	8	<=0.03	>128	8	>64	<=1	<=0.5	0.5	>1024	<=8	8	0.5	8	32	0.125	0.25	<=0.03	4	<=0.12	0.03	>64	8	blaCTX-M-32	NA	NA	NA	NA
15402EC	2014	INIAV	Portugal	Portugal	Livestock	Turkeys	Other	Cecal contents	0	NA	NA	Others (specify in next column)	Agar dilution	>64	2	>8	<=0.03	>128	>8	<=2	<=1	1	<=0.25	>1024	64	8	<=0.25	4	2	<=0.06	<=0.12	<=0.03	4	<=0.12	<=0.015	4	16	NA	NA	blaSHV-12	NA	NA
15478/ECX	2019	INIAV	Portugal	Portugal	Livestock	Pigs	Other	Cecal contents	1	NA	NA	Microdilution	NA	>64	>4	>8	0.06	>128	>8	>64	8	<=0.5	>32	>1024	>128	16	<=0.25	64	0.5	16	16	0.06	8	0.5	0.03	32	16	NA	blaTEM-1, blaTEM-30, blaTEM-207	NA	blaCMY-2	NA
16361/ECX	2015	INIAV	Portugal	Portugal	Livestock	Pigs	Other	Cecal contents	0	NA	NA	Others (specify in next column)	Agar dilution Panel 1 and microdilution Panel 2	>64	>4	8	<=0.03	<=4	<=0.015	>64	>16	16	<=0.25	>1024	<=8	8	<=0.25	8	32	<=0.06	<=0.12	<=0.03	4	<=0.12	0.06	>64	8	blaCTX-M-32	blaTEM-1	NA	NA	NA
16362/ECX	2015	INIAV	Portugal	Portugal	Livestock	Pigs	Other	Cecal contents	0	NA	NA	Others (specify in next column)	Agar dilution Panel 1 and microdilution Panel 2	>64	>4	>8	<=0.03	<=4	0.03	4	16	<=0.5	<=0.25	<=8	16	8	0.5	8	16	0.125	0.25	<=0.03	4	0.25	0.03	>64	8	blaCTX-M-32	blaTEM-1	NA	NA	NA
16427/ECX	2015	INIAV	Portugal	Portugal	Livestock	Pigs	Other	Cecal contents	0	NA	NA	Others (specify in next column)	Agar dilution Panel 1 and microdilution Panel 2	>64	>4	8	<=0.03	>128	8	>64	16	>32	>32	>1024	>128	8	0.5	8	>32	<=0.06	<=0.12	<=0.03	4	0.25	0.03	>64	8	blaCTX-M-32	NA	NA	NA	NA
16968EC	2014	INIAV	Portugal	Portugal	Livestock	Broiler_chickens	Other	Cecal contents	0	NA	NA	Others (specify in next column)	Agar dilution	>64	2	4	<=0.03	>128	4	4	16	1	0.5	>1024	8	8	<=0.25	8	2	<=0.06	<=0.12	<=0.03	4	<=0.12	<=0.015	8	8	NA	blaTEM-52	NA	NA	NA
16-AB00315	2016	BfR	Germany	Germany	Livestock	Broiler_chickens	Meat	NA	0	NA	NA	Microdilution	NA	>64	4	8	<=0.03	16	0.25	64	<=1	<=0.5	>32	>1024	<=8	4	<=0.25	4	0.5	0.06	0.12	<=0.03	4	0.25	<=0.015	4	16	NA	NA	blaSHV-12	NA	NA
16-AB00593	2016	BfR	Germany	Germany	Livestock	Turkeys	Meat	NA	0	NA	NA	Microdilution	NA	64	2	8	<=0.03	>128	>8	<=2	<=1	1	0.5	64	<=8	8	<=0.25	32	0.12	2	4	<=0.03	8	0.25	<=0.015	2	8	NA	NA	NA	blaCMY-2	NA
16-AB00609	2016	BfR	Germany	Germany	Livestock	Turkeys	Other	Sample taken from the caecum	0	NA	NA	Microdilution	NA	>64	8	8	<=0.03	>128	>8	>64	<=1	<=0.5	>32	>1024	>128	32	<=0.25	4	32	0.06	0.12	<=0.03	8	<=0.12	0.03	128	16	blaCTX-M-15	NA	NA	NA	NA
16-AB00611	2016	BfR	Germany	Germany	Livestock	Turkeys	Other	Sample taken from the caecum	0	NA	NA	Microdilution	NA	>64	8	0.5	<=0.03	<=4	<=0.015	64	<=1	1	<=0.25	>1024	<=8	4	<=0.25	4	8	0.06	0.12	<=0.03	4	0.5	<=0.015	32	1	blaCTX-M-1	NA	NA	NA	NA
16-AB00658	2016	BfR	Germany	Germany	Livestock	Turkeys	Meat	NA	0	NA	NA	Microdilution	NA	>64	2	8	<=0.03	>128	>8	<=2	<=1	1	0.5	32	<=8	8	<=0.25	32	0.12	1	2	<=0.03	8	0.25	<=0.015	2	32	NA	NA	NA	blaCMY-2	NA
16-AB00674	2016	BfR	Germany	Germany	Livestock	Broiler_chickens	Meat	NA	0	NA	NA	Microdilution	NA	>64	8	1	<=0.03	>128	8	64	<=1	<=0.5	0.5	16	128	4	0.5	4	16	0.06	0.12	<=0.03	4	<=0.12	<=0.015	64	1	blaCTX-M-14	NA	NA	NA	NA
16-AB00677	2016	BfR	Germany	Germany	Livestock	Broiler_chickens	Other	Sample taken from the caecum	0	NA	NA	Microdilution	NA	>64	4	16	<=0.03	8	0.5	64	<=1	1	>32	>1024	64	8	<=0.25	4	0.5	0.06	0.12	<=0.03	8	0.25	<=0.015	4	16	NA	NA	blaSHV-12	NA	NA
16-AB00680	2016	BfR	Germany	Germany	Livestock	Turkeys	Meat	NA	0	NA	NA	Microdilution	NA	>64	8	2	<=0.03	>128	8	>64	<=1	>32	>32	>1024	128	8	<=0.25	4	16	0.06	0.12	<=0.03	4	0.25	<=0.015	32	2	blaCTX-M-1	NA	NA	NA	NA
16-AB00681	2016	BfR	Germany	Germany	Livestock	Turkeys	Meat	NA	0	NA	NA	Microdilution	NA	>64	8	2	<=0.03	<=4	<=0.015	>64	<=1	1	<=0.25	>1024	<=8	4	0.5	8	16	0.06	0.12	<=0.03	4	0.25	<=0.015	32	2	blaCTX-M-1	NA	NA	NA	NA
16-AB00694	2016	BfR	Germany	Germany	Livestock	Broiler_chickens	Other	Sample taken from the caecum	0	NA	NA	Microdilution	NA	>64	2	4	<=0.03	>128	>8	4	<=1	<=0.5	<=0.25	<=8	<=8	8	0.5	8	0.5	0.06	0.25	<=0.03	16	0.25	<=0.015	2	4	NA	blaTEM-52	NA	NA	NA
16-AB00695	2016	BfR	Germany	Germany	Livestock	Broiler_chickens	Other	Sample taken from the caecum	0	NA	NA	Microdilution	NA	>64	8	8	<=0.03	64	0.25	<=2	<=1	1	<=0.25	16	<=8	4	<=0.25	32	0.12	4	4	<=0.03	4	0.25	<=0.015	8	4	NA	NA	NA	blaCMY-2	NA
16-AB00696	2016	BfR	Germany	Germany	Livestock	Broiler_chickens	Other	Sample taken from the caecum	0	NA	NA	Microdilution	NA	>64	4	4	<=0.03	64	0.12	<=2	<=1	<=0.5	<=0.25	32	<=8	4	<=0.25	32	0.12	4	4	<=0.03	4	0.25	<=0.015	8	8	NA	NA	NA	blaCMY-2	NA
16-AB00697	2016	BfR	Germany	Germany	Livestock	Broiler_chickens	Other	Sample taken from the caecum	0	NA	NA	Microdilution	NA	>64	8	8	<=0.03	<=4	<=0.015	<=2	<=1	<=0.5	<=0.25	16	<=8	8	<=0.25	64	0.25	8	8	<=0.03	8	0.5	<=0.015	8	8	NA	NA	NA	blaCMY-2	NA
16-AB00698	2016	BfR	Germany	Germany	Livestock	Broiler_chickens	Other	Sample taken from the caecum	0	NA	NA	Microdilution	NA	>64	2	2	<=0.03	>128	>8	8	<=1	1	0.5	32	<=8	16	<=0.25	8	0.5	0.06	0.25	<=0.03	8	0.25	<=0.015	2	2	NA	blaTEM-52	NA	NA	NA
16-AB00768	2016	BfR	Germany	Germany	Livestock	Turkeys	Faeces/manure	NA	0	NA	NA	Microdilution	NA	>64	8	2	<=0.03	8	0.06	>64	<=1	<=0.5	>32	>1024	16	16	<=0.25	16	16	0.06	0.25	<=0.03	8	0.25	<=0.015	64	2	blaCTX-M-1	NA	NA	NA	NA
16-AB00794	2016	BfR	Germany	Germany	Livestock	Broiler_chickens	Other	Sample taken from the caecum	0	NA	NA	Microdilution	NA	>64	8	1	<=0.03	>128	1	<=2	<=1	<=0.5	>32	>1024	<=8	8	<=0.25	4	8	0.12	0.25	<=0.03	4	0.25	0.03	32	2	blaCTX-M-1	NA	NA	NA	NA
16-AB00797	2016	BfR	Germany	Germany	Livestock	Broiler_chickens	Other	Sample taken from the caecum	0	NA	NA	Microdilution	NA	>64	8	16	<=0.03	8	0.5	<=2	<=1	1	<=0.25	16	<=8	8	<=0.25	4	0.5	0.06	0.12	<=0.03	4	0.25	<=0.015	8	16	NA	NA	blaSHV-12	NA	NA
16-AB00799	2016	BfR	Germany	Germany	Livestock	Broiler_chickens	Other	Sample taken from the caecum	0	NA	NA	Microdilution	NA	>64	8	16	<=0.03	<=4	0.03	<=2	<=1	1	>32	>1024	<=8	4	<=0.25	4	0.25	0.06	0.12	<=0.03	4	<=0.12	<=0.015	4	16	NA	NA	blaSHV-12	NA	NA
16-AB00806	2016	BfR	Germany	Germany	Livestock	Broiler_chickens	Other	Sample taken from the caecum	0	NA	NA	Microdilution	NA	>64	8	8	<=0.03	>128	2	<=2	<=1	<=0.5	<=0.25	16	<=8	8	<=0.25	64	0.25	4	8	<=0.03	8	0.25	0.03	8	8	NA	NA	NA	blaCMY-2	NA
16-AB00810	2016	BfR	Germany	Germany	Livestock	Broiler_chickens	Meat	NA	0	NA	NA	Microdilution	NA	>64	8	1	<=0.03	128	0.25	>64	8	<=0.5	>32	>1024	<=8	4	<=0.25	4	16	0.06	0.12	<=0.03	4	0.25	<=0.015	64	1	blaCTX-M-1	NA	NA	NA	NA
16-AB00814	2016	BfR	Germany	Germany	Livestock	Broiler_chickens	Meat	NA	0	NA	NA	Microdilution	NA	>64	8	2	<=0.03	128	0.25	64	<=1	<=0.5	1	>1024	<=8	8	0.5	4	8	0.06	0.12	<=0.03	8	0.25	<=0.015	32	1	blaCTX-M-1	NA	NA	NA	NA
16-AB00815	2016	BfR	Germany	Germany	Livestock	Broiler_chickens	Meat	NA	0	NA	NA	Microdilution	NA	>64	2	16	<=0.03	>128	>8	<=2	<=1	<=0.5	<=0.25	>1024	<=8	8	<=0.25	8	1	0.06	0.12	<=0.03	8	<=0.12	<=0.015	4	16	NA	NA	blaSHV-12	NA	NA
16-AB00822	2016	BfR	Germany	Germany	Livestock	Broiler_chickens	Other	Sample taken from the caecum	0	NA	NA	Microdilution	NA	>64	8	1	<=0.03	128	0.12	>64	<=1	2	<=0.25	>1024	<=8	8	<=0.25	4	8	0.06	0.12	<=0.03	4	0.25	<=0.015	32	1	blaCTX-M-1	NA	NA	NA	NA
16-AB00824	2016	BfR	Germany	Germany	Livestock	Broiler_chickens	Other	Sample taken from the caecum	0	NA	NA	Microdilution	NA	>64	8	16	0.06	>128	0.5	<=2	<=1	<=0.5	0.5	32	<=8	4	<=0.25	128	0.5	8	16	<=0.03	8	0.5	0.12	16	32	NA	NA	NA	blaCMY-2	NA
16-AB00834	2016	BfR	Germany	Germany	Livestock	Turkeys	Meat	NA	0	NA	NA	Microdilution	NA	>64	8	8	<=0.03	>128	>8	64	<=1	1	0.5	32	<=8	4	<=0.25	4	16	0.06	0.12	<=0.03	8	<=0.12	<=0.015	128	8	blaCTX-M-15	NA	NA	NA	NA
16-AB00836	2016	BfR	Germany	Germany	Livestock	Broiler_chickens	Faeces/manure	NA	0	NA	NA	Microdilution	NA	>64	8	1	<=0.03	<=4	<=0.015	64	<=1	1	<=0.25	>1024	<=8	4	<=0.25	8	16	0.06	0.12	<=0.03	4	0.25	<=0.015	32	1	NA	NA	blaSHV-12	NA	NA
16-AB00839	2016	BfR	Germany	Germany	Livestock	Turkeys	Faeces/manure	NA	0	NA	NA	Microdilution	NA	>64	8	1	<=0.03	<=4	<=0.015	32	<=1	<=0.5	<=0.25	>1024	<=8	4	0.5	4	4	0.06	0.12	<=0.03	4	<=0.12	<=0.015	32	2	blaCTX-M-1	NA	NA	NA	NA
16-AB00842	2016	BfR	Germany	Germany	Livestock	Broiler_chickens	Faeces/manure	NA	0	NA	NA	Microdilution	NA	>64	8	8	<=0.03	<=4	<=0.015	<=2	<=1	<=0.5	<=0.25	16	<=8	8	<=0.25	32	0.12	8	8	<=0.03	4	0.5	<=0.015	8	8	NA	NA	NA	blaCMY-2	NA
16-AB00844	2016	BfR	Germany	Germany	Livestock	Turkeys	Faeces/manure	NA	0	NA	NA	Microdilution	NA	>64	8	1	<=0.03	>128	8	>64	<=1	1	>32	>1024	<=8	8	<=0.25	8	8	0.06	0.12	<=0.03	4	0.25	0.03	64	1	blaCTX-M-1	NA	NA	NA	NA
16-AB00845	2016	BfR	Germany	Germany	Livestock	Turkeys	Faeces/manure	NA	0	NA	NA	Microdilution	NA	>64	8	8	<=0.03	>128	2	<=2	<=1	<=0.5	0.5	16	<=8	8	<=0.25	4	0.25	0.06	0.12	<=0.03	4	0.25	<=0.015	2	8	NA	NA	blaSHV-12	NA	NA
16-AB00851	2016	BfR	Germany	Germany	Livestock	Turkeys	Faeces/manure	NA	0	NA	NA	Microdilution	NA	>64	8	1	<=0.03	>128	8	64	<=1	1	>32	>1024	<=8	8	<=0.25	8	8	0.06	0.12	<=0.03	4	<=0.12	<=0.015	64	1	blaCTX-M-1	NA	NA	NA	NA
16-AB00856	2016	BfR	Germany	Germany	Livestock	Turkeys	Faeces/manure	NA	0	NA	NA	Microdilution	NA	>64	8	4	<=0.03	>128	0.5	<=2	<=1	<=0.5	>32	>1024	32	8	<=0.25	4	1	0.06	0.12	<=0.03	8	<=0.12	<=0.015	4	4	NA	blaTEM-52	NA	NA	NA
16-AB00858	2016	BfR	Germany	Germany	Livestock	Turkeys	Faeces/manure	NA	0	NA	NA	Microdilution	NA	>64	8	8	<=0.03	>128	2	>64	<=1	<=0.5	>32	>1024	16	8	<=0.25	8	2	0.06	0.12	<=0.03	8	0.25	<=0.015	8	8	NA	blaTEM-52	NA	NA	NA
16-AB00869	2016	BfR	Germany	Germany	Livestock	Turkeys	Meat	NA	0	NA	NA	Microdilution	NA	>64	8	1	<=0.03	>128	>8	>64	4	<=0.5	>32	>1024	>128	8	<=0.25	8	16	0.06	0.12	<=0.03	4	0.25	<=0.015	32	2	blaCTX-M-1	NA	NA	NA	NA
16-AB00870	2016	BfR	Germany	Germany	Fruit_vegetables	Vegetables	Sprouts	NA	0	NA	NA	Microdilution	NA	>64	8	8	<=0.03	>128	>8	>64	<=1	<=0.5	>32	>1024	<=8	64	<=0.25	8	4	0.06	0.25	<=0.03	8	<=0.12	<=0.015	64	4	blaCTX-M-27	NA	NA	NA	NA
16-AB00871	2016	BfR	Germany	Germany	Livestock	Turkeys	Meat	NA	0	NA	NA	Microdilution	NA	>64	8	1	<=0.03	>128	0.25	4	<=1	1	>32	>1024	>128	8	<=0.25	4	16	0.12	0.25	<=0.03	4	0.5	<=0.015	32	2	blaCTX-M-1	NA	NA	NA	NA
16-AB00872	2016	BfR	Germany	Germany	Livestock	Turkeys	Meat	NA	0	NA	NA	Microdilution	NA	>64	8	2	<=0.03	>128	8	>64	4	4	>32	>1024	<=8	8	0.5	8	64	0.06	0.12	<=0.03	8	0.25	<=0.015	64	2	blaCTX-M-1	NA	NA	NA	NA
16-AB00874	2016	BfR	Germany	Germany	Fruit_vegetables	Vegetables	Sprouts	NA	0	NA	NA	Microdilution	NA	>64	8	1	<=0.03	>128	>8	64	<=1	16	>32	>1024	128	16	0.5	8	4	0.06	0.25	<=0.03	8	<=0.12	0.03	64	4	blaCTX-M-65	NA	NA	NA	NA
16-AB00875	2016	BfR	Germany	Germany	Livestock	Turkeys	Meat	NA	0	NA	NA	Microdilution	NA	>64	8	1	<=0.03	>128	0.5	<=2	<=1	1	>32	>1024	<=8	8	<=0.25	8	4	0.06	0.12	<=0.03	8	0.25	<=0.015	16	1	blaCTX-M-8	NA	NA	NA	NA
16-AB00883	2016	BfR	Germany	Germany	Livestock	Turkeys	Meat	NA	0	NA	NA	Microdilution	NA	>64	8	1	<=0.03	<=4	0.03	>64	<=1	1	>32	>1024	<=8	8	0.5	8	16	0.06	0.25	<=0.03	8	0.25	<=0.015	64	1	blaCTX-M-1	NA	NA	NA	NA
16-AB00884	2016	BfR	Germany	Germany	Livestock	Broiler_chickens	Meat	NA	0	NA	NA	Microdilution	NA	>64	8	2	<=0.03	<=4	0.03	>64	<=1	<=0.5	0.5	16	16	16	<=0.25	8	8	0.06	0.25	<=0.03	8	<=0.12	<=0.015	32	2	blaCTX-M-1	NA	NA	NA	NA
16-AB00885	2016	BfR	Germany	Germany	Livestock	Turkeys	Meat	NA	0	NA	NA	Microdilution	NA	>64	8	4	<=0.03	64	1	32	<=1	1	>32	>1024	128	4	<=0.25	4	16	0.06	0.12	<=0.03	8	0.25	<=0.015	64	4	blaCTX-M-15	NA	NA	NA	NA
16-AB00886	2016	BfR	Germany	Germany	Livestock	Broiler_chickens	Meat	NA	0	NA	NA	Microdilution	NA	>64	8	0.5	<=0.03	32	0.12	<=2	<=1	1	1	>1024	128	4	<=0.25	2	4	0.06	0.12	<=0.03	4	0.25	<=0.015	16	0.25	blaCTX-M-1	NA	NA	NA	NA
16-AB00888	2016	BfR	Germany	Germany	Livestock	Turkeys	Meat	NA	0	NA	NA	Microdilution	NA	>64	4	16	<=0.03	>128	1	>64	<=1	<=0.5	<=0.25	<=8	<=8	4	<=0.25	4	0.5	0.06	0.12	<=0.03	8	<=0.12	<=0.015	4	16	NA	NA	blaSHV-12	NA	NA
16-AB00889	2016	BfR	Germany	Germany	Livestock	Broiler_chickens	Meat	NA	0	NA	NA	Microdilution	NA	>64	8	2	<=0.03	>128	1	>64	<=1	<=0.5	>32	>1024	<=8	4	<=0.25	8	32	0.06	0.25	<=0.03	8	<=0.12	<=0.015	64	4	blaCTX-M-1	NA	NA	NA	NA
16-AB00891	2016	BfR	Germany	Germany	Livestock	Turkeys	Meat	NA	0	NA	NA	Microdilution	NA	>64	2	1	<=0.03	<=4	<=0.015	>64	<=1	1	0.5	>1024	<=8	8	0.5	4	0.25	0.06	0.12	<=0.03	8	0.25	<=0.015	2	1	NA	blaTEM-52	NA	NA	NA
16-AB00892	2016	BfR	Germany	Germany	Livestock	Broiler_chickens	Meat	NA	0	NA	NA	Microdilution	NA	>64	2	16	<=0.03	>128	8	64	<=1	<=0.5	>32	>1024	<=8	8	<=0.25	8	0.5	0.06	0.12	<=0.03	16	0.25	<=0.015	8	64	NA	NA	blaSHV-12	NA	NA
16-AB00895	2016	BfR	Germany	Germany	Livestock	Broiler_chickens	Meat	NA	0	NA	NA	Microdilution	NA	>64	8	1	<=0.03	128	0.25	64	<=1	1	0.5	>1024	<=8	8	<=0.25	8	4	0.06	0.12	<=0.03	4	<=0.12	<=0.015	32	1	blaCTX-M-1	NA	NA	NA	NA
16-AB00898	2016	BfR	Germany	Germany	Livestock	Broiler_chickens	Meat	NA	0	NA	NA	Microdilution	NA	>64	8	8	<=0.03	<=4	<=0.015	4	<=1	2	0.5	64	<=8	8	<=0.25	4	2	0.06	0.12	<=0.03	8	0.25	<=0.015	8	8	NA	blaTEM-52	NA	NA	NA
16-AB00904	2016	BfR	Germany	Germany	Livestock	Broiler_chickens	Other	Sample taken from the caecum	0	NA	NA	Microdilution	NA	>64	8	8	<=0.03	>128	0.5	8	<=1	1	>32	32	16	8	<=0.25	64	0.12	4	4	<=0.03	8	0.25	0.03	8	8	NA	NA	NA	blaCMY-2	NA
16-AB00905	2016	BfR	Germany	Germany	Livestock	Broiler_chickens	Other	Sample taken from the caecum	0	NA	NA	Microdilution	NA	>64	8	8	<=0.03	<=4	<=0.015	>64	<=1	32	0.5	>1024	<=8	8	<=0.25	64	0.5	8	16	<=0.03	8	0.5	0.03	8	8	NA	NA	NA	blaCMY-2	NA
16-AB00912	2016	BfR	Germany	Germany	Livestock	Turkeys	Faeces/manure	NA	0	NA	NA	Microdilution	NA	>64	8	16	<=0.03	<=4	<=0.015	64	<=1	<=0.5	0.5	>1024	32	8	<=0.25	4	0.5	0.06	0.12	<=0.03	16	<=0.12	<=0.015	8	16	NA	NA	blaSHV-12	NA	NA
16-AB00915	2016	BfR	Germany	Germany	Livestock	Broiler_chickens	Faeces/manure	NA	0	NA	NA	Microdilution	NA	>64	8	1	<=0.03	128	0.25	>64	<=1	1	0.5	>1024	<=8	8	<=0.25	4	4	0.06	0.12	<=0.03	4	<=0.12	<=0.015	32	2	blaCTX-M-1	NA	NA	NA	NA
16-AB00970	2016	BfR	Germany	Germany	Livestock	Turkeys	Other	Sample taken from the caecum	0	NA	NA	Microdilution	NA	>64	4	8	<=0.03	128	0.12	>64	<=1	1	1	>1024	32	8	<=0.25	4	0.25	0.06	0.12	<=0.03	8	<=0.12	<=0.015	4	16	NA	NA	blaSHV-12	NA	NA
16-AB00971	2016	BfR	Germany	Germany	Livestock	Turkeys	Other	Sample taken from the caecum	0	NA	NA	Microdilution	NA	>64	8	2	<=0.03	<=4	0.03	<=2	<=1	2	<=0.25	<=8	16	16	<=0.25	4	32	0.06	0.12	<=0.03	8	0.25	<=0.015	64	2	blaCTX-M-1	NA	NA	NA	NA
16-AB00972	2016	BfR	Germany	Germany	Livestock	Broiler_chickens	Other	Sample taken from the caecum	0	NA	NA	Microdilution	NA	>64	2	2	<=0.03	<=4	0.03	4	<=1	1	0.5	16	<=8	8	<=0.25	4	0.25	0.06	0.12	<=0.03	4	0.5	<=0.015	2	4	NA	blaTEM-52	NA	NA	NA
16-AB00973	2016	BfR	Germany	Germany	Livestock	Broiler_chickens	Other	Sample taken from the caecum	0	NA	NA	Microdilution	NA	>64	8	8	<=0.03	<=4	<=0.015	64	<=1	>32	<=0.25	>1024	<=8	8	<=0.25	64	0.5	8	8	<=0.03	4	0.25	0.03	8	8	NA	NA	NA	blaCMY-2	NA
16-AB00974	2016	BfR	Germany	Germany	Livestock	Broiler_chickens	Other	Sample taken from the caecum	0	NA	NA	Microdilution	NA	>64	8	1	<=0.03	>128	>8	64	<=1	1	>32	>1024	<=8	8	<=0.25	4	4	0.06	0.12	<=0.03	4	<=0.12	<=0.015	16	4	blaCTX-M-1	NA	NA	NA	NA
16-AB00975	2016	BfR	Germany	Germany	Livestock	Broiler_chickens	Other	Sample taken from the caecum	0	NA	NA	Microdilution	NA	>64	8	1	<=0.03	>128	>8	>64	<=1	<=0.5	<=0.25	>1024	<=8	4	0.5	4	8	0.06	0.12	<=0.03	8	<=0.12	<=0.015	32	1	blaCTX-M-1	NA	NA	NA	NA
16-AB00976	2016	BfR	Germany	Germany	Livestock	Broiler_chickens	Other	Sample taken from the caecum	0	NA	NA	Microdilution	NA	>64	2	2	0.06	>128	>8	>64	<=1	<=0.5	<=0.25	16	<=8	8	0.5	8	0.25	0.06	0.25	<=0.03	4	0.25	<=0.015	4	2	NA	blaTEM-52	NA	NA	NA
16-AB00977	2016	BfR	Germany	Germany	Livestock	Broiler_chickens	Other	Sample taken from the caecum	0	NA	NA	Microdilution	NA	>64	8	1	<=0.03	>128	1	>64	<=1	<=0.5	<=0.25	>1024	<=8	<=2	<=0.25	8	8	0.12	0.25	<=0.03	4	<=0.12	<=0.015	32	2	blaCTX-M-1	NA	NA	NA	NA
16-AB00978	2016	BfR	Germany	Germany	Livestock	Broiler_chickens	Other	Sample taken from the caecum	0	NA	NA	Microdilution	NA	>64	8	1	<=0.03	<=4	<=0.015	<=2	<=1	<=0.5	<=0.25	<=8	<=8	4	0.5	4	8	0.06	0.12	<=0.03	4	0.25	<=0.015	16	1	blaCTX-M-1	NA	NA	NA	NA
16-AB00979	2016	BfR	Germany	Germany	Livestock	Broiler_chickens	Other	Sample taken from the caecum	0	NA	NA	Microdilution	NA	>64	8	1	<=0.03	>128	0.25	>64	<=1	<=0.5	<=0.25	>1024	<=8	4	<=0.25	8	8	0.06	0.12	<=0.03	8	0.25	<=0.015	32	1	blaCTX-M-1	NA	NA	NA	NA
16-AB00980	2016	BfR	Germany	Germany	Livestock	Broiler_chickens	Other	Sample taken from the caecum	0	NA	NA	Microdilution	NA	>64	8	1	<=0.03	128	0.25	>64	<=1	<=0.5	<=0.25	>1024	<=8	4	<=0.25	8	4	0.06	0.12	<=0.03	8	<=0.12	<=0.015	32	1	blaCTX-M-1	NA	NA	NA	NA
16-AB00981	2016	BfR	Germany	Germany	Livestock	Broiler_chickens	Other	Sample taken from the caecum	0	NA	NA	Microdilution	NA	>64	8	8	<=0.03	>128	>8	<=2	2	<=0.5	<=0.25	<=8	<=8	4	0.5	4	4	0.06	0.25	<=0.03	8	<=0.12	<=0.015	32	4	blaCTX-M-15	NA	NA	NA	NA
16-AB00982	2016	BfR	Germany	Germany	Livestock	Broiler_chickens	Other	Sample taken from the caecum	0	NA	NA	Microdilution	NA	>64	8	2	<=0.03	>128	>8	<=2	4	1	0.5	16	<=8	<=2	<=0.25	4	2	0.06	0.12	<=0.03	8	0.25	<=0.015	32	2	blaCTX-M-15	NA	NA	NA	NA
16-AB00983	2016	BfR	Germany	Germany	Livestock	Broiler_chickens	Other	Sample taken from the caecum	0	NA	NA	Microdilution	NA	>64	2	2	<=0.03	<=4	<=0.015	<=2	<=1	4	<=0.25	16	<=8	4	<=0.25	16	0.5	0.06	0.25	<=0.03	8	0.25	<=0.015	2	2	NA	blaTEM-52	NA	NA	NA
16-AB00984	2016	BfR	Germany	Germany	Livestock	Broiler_chickens	Other	Sample taken from the caecum	0	NA	NA	Microdilution	NA	>64	8	4	<=0.03	>128	>8	<=2	<=1	<=0.5	<=0.25	16	128	8	<=0.25	8	2	0.06	0.25	<=0.03	8	0.5	<=0.015	64	2	blaCTX-M-65	NA	NA	NA	NA
16-AB00986	2016	BfR	Germany	Germany	Livestock	Broiler_chickens	Other	Sample taken from the caecum	0	NA	NA	Microdilution	NA	>64	8	1	<=0.03	>128	8	64	<=1	<=0.5	<=0.25	>1024	<=8	8	<=0.25	4	8	0.06	0.25	<=0.03	4	0.25	<=0.015	32	2	blaCTX-M-1	NA	NA	NA	NA
16-AB00992	2016	BfR	Germany	Germany	Livestock	Turkeys	Meat	NA	0	NA	NA	Microdilution	NA	>64	8	2	<=0.03	>128	>8	>64	<=1	<=0.5	>32	>1024	64	8	<=0.25	8	64	0.06	0.25	<=0.03	8	<=0.12	<=0.015	128	4	blaCTX-M-1	NA	NA	NA	NA
16-AB01003	2016	BfR	Germany	Germany	Livestock	Broiler_chickens	Meat	NA	0	NA	NA	Microdilution	NA	>64	8	16	0.06	16	0.5	<=2	<=1	1	<=0.25	16	<=8	4	<=0.25	128	0.5	8	8	0.06	16	0.25	0.5	16	16	blaCTX-M-1	NA	NA	blaCMY-2	NA
16-AB01006	2016	BfR	Germany	Germany	Livestock	Broiler_chickens	Other	Sample taken from the caecum	0	NA	NA	Microdilution	NA	>64	8	1	<=0.03	128	0.25	>64	<=1	<=0.5	<=0.25	>1024	<=8	4	0.5	8	8	0.06	0.25	<=0.03	8	0.25	<=0.015	64	2	blaCTX-M-1	NA	NA	NA	NA
16-AB01018	2016	BfR	Germany	Germany	Livestock	Broiler_chickens	Other	Sample taken from the caecum	0	NA	NA	Microdilution	NA	>64	1	1	<=0.03	<=4	<=0.015	<=2	<=1	<=0.5	<=0.25	<=8	<=8	8	<=0.25	8	0.25	0.06	0.25	<=0.03	8	<=0.12	<=0.015	2	2	NA	blaTEM-52	NA	NA	NA
16-AB01019	2016	BfR	Germany	Germany	Livestock	Broiler_chickens	Other	Sample taken from the caecum	0	NA	NA	Microdilution	NA	64	4	16	<=0.03	>128	8	64	<=1	<=0.5	<=0.25	>1024	128	4	<=0.25	64	0.25	4	2	<=0.03	4	0.25	0.03	8	4	NA	NA	NA	blaCMY-2	NA
16-AB01020	2016	BfR	Germany	Germany	Livestock	Broiler_chickens	Other	Sample taken from the caecum	0	NA	NA	Microdilution	NA	>64	8	16	<=0.03	128	2	<=2	<=1	1	<=0.25	<=8	<=8	8	<=0.25	4	0.5	0.06	0.12	<=0.03	8	0.25	<=0.015	4	32	NA	NA	blaSHV-12	NA	NA
16-AB01021	2016	BfR	Germany	Germany	Livestock	Broiler_chickens	Other	Sample taken from the caecum	0	NA	NA	Microdilution	NA	>64	4	8	<=0.03	128	2	<=2	<=1	<=0.5	<=0.25	<=8	<=8	8	<=0.25	4	0.25	0.06	0.12	<=0.03	4	<=0.12	<=0.015	4	32	NA	NA	blaSHV-12	NA	NA
16-AB01022	2016	BfR	Germany	Germany	Livestock	Broiler_chickens	Other	Sample taken from the caecum	0	NA	NA	Microdilution	NA	>64	8	16	<=0.03	>128	0.5	<=2	8	<=0.5	<=0.25	<=8	16	16	<=0.25	8	2	0.06	0.25	<=0.03	16	<=0.12	<=0.015	8	16	NA	blaTEM-52	NA	NA	NA
16-AB01023	2016	BfR	Germany	Germany	Livestock	Turkeys	Meat	NA	0	NA	NA	Microdilution	NA	>64	8	2	<=0.03	<=4	<=0.015	<=2	<=1	<=0.5	<=0.25	<=8	<=8	8	<=0.25	8	32	0.06	0.25	<=0.03	8	0.25	<=0.015	64	2	blaCTX-M-1	NA	NA	NA	NA
16-AB01024	2016	BfR	Germany	Germany	Livestock	Turkeys	Meat	NA	0	NA	NA	Microdilution	NA	>64	8	8	<=0.03	8	0.25	16	<=1	16	<=0.25	>1024	<=8	4	<=0.25	4	0.5	0.06	0.12	<=0.03	4	0.25	<=0.015	4	8	NA	NA	blaSHV-12	NA	NA
16-AB01025	2016	BfR	Germany	Germany	Livestock	Turkeys	Meat	NA	0	NA	NA	Microdilution	NA	>64	8	8	<=0.03	>128	1	<=2	<=1	<=0.5	<=0.25	16	<=8	4	<=0.25	16	2	0.12	0.25	<=0.03	8	0.25	0.03	8	8	NA	blaTEM-52	NA	NA	NA
16-AB01026	2016	BfR	Germany	Germany	Livestock	Turkeys	Meat	NA	0	NA	NA	Microdilution	NA	>64	8	0.5	<=0.03	<=4	<=0.015	>64	<=1	<=0.5	<=0.25	16	<=8	<=2	<=0.25	8	4	0.06	0.12	<=0.03	4	<=0.12	<=0.015	16	0.5	blaCTX-M-1	NA	NA	NA	NA
16-AB01027	2016	BfR	Germany	Germany	Livestock	Turkeys	Meat	NA	0	NA	NA	Microdilution	NA	>64	8	1	<=0.03	128	0.25	64	8	>32	>32	>1024	<=8	<=2	0.5	8	16	0.06	0.12	<=0.03	4	<=0.12	0.03	32	2	blaCTX-M-1	NA	NA	NA	NA
16-AB01032	2016	BfR	Germany	Germany	Livestock	Broiler_chickens	Meat	NA	0	NA	NA	Microdilution	NA	>64	8	8	<=0.03	>128	>8	>64	<=1	<=0.5	0.5	>1024	<=8	8	0.5	16	8	0.12	0.25	<=0.03	8	<=0.12	<=0.015	64	16	blaCTX-M-15	NA	NA	NA	NA
16-AB01033	2016	BfR	Germany	Germany	Livestock	Turkeys	Meat	NA	0	NA	NA	Microdilution	NA	>64	8	4	<=0.03	>128	8	64	<=1	>32	>32	>1024	<=8	>64	<=0.25	8	16	0.06	0.12	<=0.03	8	<=0.12	<=0.015	64	4	blaCTX-M-27	NA	NA	NA	NA
16-AB01034	2016	BfR	Germany	Germany	Livestock	Broiler_chickens	Meat	NA	0	NA	NA	Microdilution	NA	>64	8	16	<=0.03	<=4	<=0.015	>64	<=1	>32	<=0.25	>1024	<=8	8	0.5	128	1	16	32	0.06	16	0.5	0.12	64	32	NA	NA	NA	blaCMY-2	NA
16-AB01037	2016	BfR	Germany	Germany	Livestock	Broiler_chickens	Meat	NA	0	NA	NA	Microdilution	NA	>64	8	4	<=0.03	128	0.25	<=2	4	1	<=0.25	>1024	<=8	4	<=0.25	8	32	0.06	0.12	<=0.03	8	0.25	<=0.015	64	2	blaCTX-M-1	NA	NA	NA	NA
16-AB01040	2016	BfR	Germany	Germany	Livestock	Turkeys	Meat	NA	0	NA	NA	Microdilution	NA	>64	8	4	<=0.03	>128	>8	64	<=1	>32	>32	>1024	<=8	64	<=0.25	8	16	0.06	0.12	<=0.03	8	0.25	<=0.015	128	8	blaCTX-M-27	NA	NA	NA	NA
16-AB01043	2016	BfR	Germany	Germany	Livestock	Broiler_chickens	Meat	NA	0	NA	NA	Microdilution	NA	>64	8	2	<=0.03	128	0.5	<=2	8	1	<=0.25	>1024	<=8	8	<=0.25	8	16	0.06	0.25	<=0.03	8	0.5	<=0.015	64	2	blaCTX-M-1	NA	NA	NA	NA
16-AB01051	2016	BfR	Germany	Germany	Livestock	Broiler_chickens	Meat	NA	0	NA	NA	Microdilution	NA	>64	4	16	<=0.03	>128	2	>64	<=1	<=0.5	>32	>1024	128	8	0.5	4	0.5	0.06	0.12	<=0.03	8	0.25	<=0.015	4	32	NA	NA	blaSHV-12	NA	NA
16-AB01055	2016	BfR	Germany	Germany	Livestock	Broiler_chickens	Other	Sample taken from the caecum	0	NA	NA	Microdilution	NA	>64	8	4	<=0.03	<=4	<=0.015	<=2	<=1	1	<=0.25	16	<=8	4	<=0.25	4	32	0.06	0.12	<=0.03	8	0.25	<=0.015	64	4	blaCTX-M-32	NA	NA	NA	NA
16-AB01091	2016	BfR	Germany	Germany	Livestock	Turkeys	Meat	NA	0	NA	NA	Microdilution	NA	>64	8	1	<=0.03	>128	0.25	<=2	<=1	32	0.5	16	<=8	4	<=0.25	4	8	0.06	0.12	<=0.03	4	<=0.12	<=0.015	32	2	blaCTX-M-1	NA	NA	NA	NA
16-AB01097	2016	BfR	Germany	Germany	Livestock	Broiler_chickens	Other	Sample taken from the caecum	0	NA	NA	Microdilution	NA	>64	4	16	<=0.03	>128	>8	<=2	<=1	1	<=0.25	>1024	<=8	8	<=0.25	8	2	0.06	0.25	<=0.03	8	0.25	<=0.015	4	16	NA	NA	blaSHV-12	NA	NA
16-AB01098	2016	BfR	Germany	Germany	Livestock	Broiler_chickens	Other	Sample taken from the caecum	0	NA	NA	Microdilution	NA	>64	4	16	<=0.03	128	2	<=2	<=1	1	0.5	16	<=8	8	<=0.25	4	0.5	0.06	0.12	<=0.03	8	0.25	<=0.015	4	16	NA	NA	blaSHV-12	NA	NA
16-AB01101	2016	BfR	Germany	Germany	Livestock	Broiler_chickens	Other	Sample taken from the caecum	0	NA	NA	Microdilution	NA	>64	1	0.5	<=0.03	>128	1	>64	<=1	1	<=0.25	>1024	>128	8	<=0.25	4	0.25	0.06	0.12	<=0.03	4	<=0.12	<=0.015	2	0.5	NA	NA	blaSHV-2a	NA	NA
16-AB01108	2016	BfR	Germany	Germany	Livestock	Broiler_chickens	Other	Sample taken from the caecum	0	NA	NA	Microdilution	NA	>64	8	1	<=0.03	>128	>8	<=2	<=1	1	>32	>1024	<=8	8	<=0.25	4	4	0.06	0.12	<=0.03	4	<=0.12	<=0.015	32	1	blaCTX-M-1	NA	NA	NA	NA
16-AB01119	2016	BfR	Germany	Germany	Livestock	Broiler_chickens	Meat	NA	0	NA	NA	Microdilution	NA	>64	8	8	<=0.03	>128	0.5	64	<=1	32	<=0.25	>1024	<=8	4	<=0.25	64	0.25	8	8	<=0.03	4	0.5	0.03	8	8	NA	NA	NA	blaCMY-2	NA
16-AB01121	2016	BfR	Germany	Germany	Livestock	Broiler_chickens	Meat	NA	0	NA	NA	Microdilution	NA	>64	8	16	<=0.03	>128	>8	64	4	1	>32	>1024	32	8	<=0.25	16	1	0.12	0.12	<=0.03	8	0.25	<=0.015	8	32	NA	NA	blaSHV-12	NA	NA
16-AB01122	2016	BfR	Germany	Germany	Livestock	Broiler_chickens	Meat	NA	0	NA	NA	Microdilution	NA	>64	8	8	<=0.03	128	0.5	64	<=1	32	<=0.25	>1024	<=8	4	<=0.25	64	0.25	4	4	<=0.03	4	0.25	0.03	8	8	NA	NA	NA	blaCMY-2	NA
16-AB01124	2016	BfR	Germany	Germany	Livestock	Turkeys	Meat	NA	0	NA	NA	Microdilution	NA	>64	8	4	<=0.03	>128	>8	64	<=1	<=0.5	>32	>1024	>128	8	<=0.25	8	16	0.06	0.25	<=0.03	8	0.25	<=0.015	64	8	blaCTX-M-1	NA	NA	NA	NA
16-AB01126	2016	BfR	Germany	Germany	Livestock	Broiler_chickens	Meat	NA	0	NA	NA	Microdilution	NA	>64	8	8	<=0.03	128	0.25	64	<=1	32	<=0.25	>1024	<=8	4	<=0.25	64	0.25	4	4	<=0.03	4	0.25	0.03	8	8	NA	NA	NA	blaCMY-2	NA
16-AB01128	2016	BfR	Germany	Germany	Livestock	Broiler_chickens	Meat	NA	0	NA	NA	Microdilution	NA	>64	8	8	<=0.03	>128	0.25	4	<=1	1	<=0.25	>1024	<=8	8	<=0.25	64	0.25	8	4	<=0.03	8	0.25	0.03	16	8	NA	NA	NA	blaCMY-2	NA
16-AB01131	2016	BfR	Germany	Germany	Livestock	Broiler_chickens	Meat	NA	0	NA	NA	Microdilution	NA	>64	4	0.5	<=0.03	<=4	<=0.015	32	<=1	<=0.5	0.5	>1024	128	4	<=0.25	4	4	0.06	0.12	<=0.03	4	<=0.12	<=0.015	64	0.5	blaCTX-M-1	NA	NA	NA	NA
16-AB01134	2016	BfR	Germany	Germany	Livestock	Turkeys	Meat	NA	0	NA	NA	Microdilution	NA	>64	8	1	<=0.03	<=4	<=0.015	<=2	<=1	<=0.5	>32	>1024	<=8	8	<=0.25	4	8	0.06	0.12	<=0.03	8	0.25	<=0.015	64	1	blaCTX-M-1	NA	NA	NA	NA
16-AB01135	2016	BfR	Germany	Germany	Livestock	Turkeys	Meat	NA	0	NA	NA	Microdilution	NA	>64	8	2	<=0.03	32	0.5	>64	<=1	1	<=0.25	>1024	<=8	8	<=0.25	8	16	0.12	0.25	<=0.03	8	0.25	<=0.015	64	2	blaCTX-M-1	NA	NA	NA	NA
16-AB01136	2016	BfR	Germany	Germany	Livestock	Turkeys	Meat	NA	0	NA	NA	Microdilution	NA	>64	8	2	<=0.03	>128	>8	32	4	<=0.5	>32	>1024	128	64	<=0.25	4	8	0.06	0.12	<=0.03	4	0.5	<=0.015	32	2	blaCTX-M-1	NA	NA	NA	NA
16-AB01142	2016	BfR	Germany	Germany	Livestock	Turkeys	Meat	NA	0	NA	NA	Microdilution	NA	>64	8	1	<=0.03	32	0.5	64	<=1	<=0.5	<=0.25	>1024	<=8	4	<=0.25	8	16	0.06	0.12	<=0.03	4	0.25	<=0.015	32	1	blaCTX-M-1	NA	NA	NA	NA
16-AB01163	2016	BfR	Germany	Germany	Livestock	Broiler_chickens	Meat	NA	0	NA	NA	Microdilution	NA	>64	8	0.5	<=0.03	<=4	<=0.015	32	<=1	<=0.5	<=0.25	>1024	<=8	4	<=0.25	4	8	0.06	0.12	<=0.03	4	0.25	<=0.015	32	0.5	blaCTX-M-1	NA	NA	NA	NA
16-AB01182	2016	BfR	Germany	Germany	Livestock	Turkeys	Meat	NA	0	NA	NA	Microdilution	NA	>64	8	2	<=0.03	>128	>8	>64	<=1	<=0.5	>32	>1024	<=8	>64	0.5	4	4	0.06	0.25	<=0.03	8	0.25	<=0.015	32	2	blaCTX-M-14	NA	NA	NA	NA
16-AB01183	2016	BfR	Germany	Germany	Livestock	Turkeys	Meat	NA	0	NA	NA	Microdilution	NA	>64	8	4	<=0.03	>128	>8	<=2	<=1	<=0.5	<=0.25	<=8	<=8	8	<=0.25	8	4	0.06	0.12	<=0.03	8	0.25	<=0.015	32	4	blaCTX-M-15	NA	NA	NA	NA
16-AB01195	2016	BfR	Germany	Germany	Livestock	Turkeys	Meat	NA	0	NA	NA	Microdilution	NA	>64	8	1	<=0.03	>128	>8	>64	<=1	2	>32	>1024	<=8	>64	0.5	8	16	0.06	0.12	<=0.03	8	<=0.12	<=0.015	64	1	blaCTX-M-14	NA	NA	NA	NA
16-AB01196	2016	BfR	Germany	Germany	Livestock	Turkeys	Meat	NA	0	NA	NA	Microdilution	NA	>64	8	4	<=0.03	>128	>8	<=2	<=1	<=0.5	<=0.25	<=8	<=8	8	<=0.25	4	4	0.06	0.12	<=0.03	8	<=0.12	<=0.015	32	4	blaCTX-M-15	NA	NA	NA	NA
16-AB01197	2016	BfR	Germany	Germany	Livestock	Broiler_chickens	Meat	NA	0	NA	NA	Microdilution	NA	>64	8	8	<=0.03	<=4	<=0.015	4	<=1	32	<=0.25	>1024	<=8	4	<=0.25	64	0.12	4	8	<=0.03	8	0.25	0.03	8	8	NA	NA	NA	blaCMY-2	NA
16-AB01198	2016	BfR	Germany	Germany	Livestock	Broiler_chickens	Meat	NA	0	NA	NA	Microdilution	NA	>64	8	8	<=0.03	>128	0.25	64	<=1	32	<=0.25	>1024	<=8	8	<=0.25	64	0.25	8	4	<=0.03	8	0.25	0.03	8	8	NA	NA	NA	blaCMY-2	NA
16-AB01199	2016	BfR	Germany	Germany	Livestock	Broiler_chickens	Meat	NA	0	NA	NA	Microdilution	NA	>64	4	8	<=0.03	<=4	0.5	<=2	<=1	<=0.5	<=0.25	<=8	<=8	8	<=0.25	4	0.25	0.06	0.12	<=0.03	8	0.25	<=0.015	4	8	NA	NA	blaSHV-12	NA	NA
16-AB01200	2016	BfR	Germany	Germany	Livestock	Broiler_chickens	Meat	NA	0	NA	NA	Microdilution	NA	>64	4	16	<=0.03	8	0.5	<=2	<=1	1	<=0.25	16	<=8	8	<=0.25	4	0.25	0.06	0.12	<=0.03	8	<=0.12	<=0.015	4	16	NA	NA	blaSHV-12	NA	NA
16-AB01202	2016	BfR	Germany	Germany	Livestock	Broiler_chickens	Meat	NA	0	NA	NA	Microdilution	NA	>64	8	8	<=0.03	>128	>8	>64	<=1	<=0.5	<=0.25	<=8	<=8	<=2	<=0.25	4	32	0.06	0.12	<=0.03	8	0.25	0.03	64	8	blaCTX-M-15	NA	NA	NA	NA
16-AB01208	2016	BfR	Germany	Germany	Livestock	Turkeys	Faeces/manure	NA	0	NA	NA	Microdilution	NA	>64	1	1	<=0.03	16	0.5	<=2	<=1	<=0.5	<=0.25	16	<=8	8	<=0.25	4	0.12	0.06	0.12	<=0.03	4	0.25	<=0.015	2	1	NA	blaTEM-52	NA	NA	NA
16-AB01210	2016	BfR	Germany	Germany	Livestock	Broiler_chickens	Faeces/manure	NA	0	NA	NA	Microdilution	NA	>64	2	2	<=0.03	<=4	0.03	>64	<=1	1	0.5	16	<=8	8	<=0.25	4	0.25	0.06	0.12	<=0.03	4	<=0.12	<=0.015	2	2	NA	blaTEM-52	NA	NA	NA
16-AB01217	2016	BfR	Germany	Germany	Livestock	Broiler_chickens	Meat	NA	0	NA	NA	Microdilution	NA	>64	8	16	0.06	128	0.5	>64	<=1	<=0.5	>32	>1024	32	16	<=0.25	16	2	0.06	0.25	<=0.03	8	0.25	0.03	32	32	NA	NA	blaSHV-12	NA	NA
16-AB01286	2016	BfR	Germany	Germany	Livestock	Broiler_chickens	Meat	NA	0	NA	NA	Microdilution	NA	>64	4	4	<=0.03	>128	1	<=2	<=1	1	>32	<=8	<=8	4	0.5	4	0.25	0.06	0.12	<=0.03	8	0.25	<=0.015	4	4	NA	blaTEM-52	NA	NA	NA
16-AB01287	2016	BfR	Germany	Germany	Livestock	Broiler_chickens	Meat	NA	0	NA	NA	Microdilution	NA	>64	8	16	<=0.03	<=4	<=0.015	>64	<=1	<=0.5	<=0.25	>1024	64	8	<=0.25	4	0.5	0.06	0.12	<=0.03	4	<=0.12	<=0.015	4	16	NA	NA	blaSHV-12	NA	NA
16-AB01288	2016	BfR	Germany	Germany	Livestock	Broiler_chickens	Meat	NA	0	NA	NA	Microdilution	NA	>64	8	2	<=0.03	>128	>8	<=2	<=1	32	<=0.25	<=8	<=8	8	<=0.25	16	64	0.06	0.25	<=0.03	4	0.5	0.06	128	2	blaCTX-M-1	NA	NA	NA	NA
16-AB01289	2016	BfR	Germany	Germany	Livestock	Broiler_chickens	Meat	NA	0	NA	NA	Microdilution	NA	>64	8	1	<=0.03	>128	2	<=2	<=1	1	>32	>1024	<=8	8	<=0.25	4	4	0.06	0.12	<=0.03	8	0.5	<=0.015	32	1	blaCTX-M-1	NA	NA	NA	NA
16-AB01290	2016	BfR	Germany	Germany	Livestock	Broiler_chickens	Meat	NA	0	NA	NA	Microdilution	NA	>64	8	2	<=0.03	>128	>8	<=2	<=1	1	>32	>1024	128	8	<=0.25	16	8	0.12	0.25	<=0.03	8	<=0.12	0.03	64	2	blaCTX-M-1	NA	NA	NA	NA
16-AB01293	2016	BfR	Germany	Germany	Livestock	Broiler_chickens	Other	Sample taken from the caecum	0	NA	NA	Microdilution	NA	>64	8	1	<=0.03	>128	8	>64	<=1	<=0.5	>32	>1024	<=8	>64	<=0.25	4	4	0.06	0.25	<=0.03	4	0.25	<=0.015	64	2	blaCTX-M-27	NA	NA	NA	NA
16-AB01294	2016	BfR	Germany	Germany	Livestock	Broiler_chickens	Other	Sample taken from the caecum	0	NA	NA	Microdilution	NA	>64	4	4	<=0.03	<=4	<=0.015	<=2	<=1	1	0.5	>1024	32	8	<=0.25	8	1	0.06	0.25	<=0.03	4	<=0.12	<=0.015	4	4	NA	blaTEM-52	NA	NA	NA
16-AB01295	2016	BfR	Germany	Germany	Livestock	Broiler_chickens	Other	Sample taken from the caecum	0	NA	NA	Microdilution	NA	>64	8	2	<=0.03	>128	2	>64	<=1	<=0.5	0.5	>1024	32	8	<=0.25	8	4	0.06	0.25	<=0.03	8	0.25	<=0.015	128	1	blaCTX-M-14	NA	NA	NA	NA
16-AB01298	2016	BfR	Germany	Germany	Livestock	Broiler_chickens	Other	Sample taken from the caecum	0	NA	NA	Microdilution	NA	>64	8	2	<=0.03	>128	0.5	<=2	<=1	<=0.5	0.5	16	<=8	8	<=0.25	8	32	0.06	0.25	<=0.03	8	0.25	<=0.015	64	2	blaCTX-M-65	NA	NA	NA	NA
16-AB01299	2016	BfR	Germany	Germany	Livestock	Broiler_chickens	Other	Sample taken from the caecum	0	NA	NA	Microdilution	NA	>64	8	8	<=0.03	>128	>8	>64	<=1	32	>32	>1024	<=8	64	<=0.25	16	32	0.06	0.12	<=0.03	8	<=0.12	<=0.015	64	8	blaCTX-M-1	NA	NA	NA	NA
16-AB01300	2016	BfR	Germany	Germany	Livestock	Broiler_chickens	Other	Sample taken from the caecum	0	NA	NA	Microdilution	NA	>64	8	8	<=0.03	>128	>8	64	<=1	>32	0.5	>1024	<=8	16	<=0.25	8	32	0.06	0.25	<=0.03	8	0.5	<=0.015	128	16	blaCTX-M-15	NA	NA	NA	NA
16-AB01301	2016	BfR	Germany	Germany	Livestock	Broiler_chickens	Other	Sample taken from the caecum	0	NA	NA	Microdilution	NA	>64	8	16	<=0.03	>128	>8	<=2	<=1	32	0.5	>1024	<=8	8	<=0.25	16	8	0.06	0.25	<=0.03	8	<=0.12	0.03	128	8	blaCTX-M-1	NA	NA	NA	NA
16-AB01302	2016	BfR	Germany	Germany	Livestock	Broiler_chickens	Other	Sample taken from the caecum	0	NA	NA	Microdilution	NA	>64	8	16	<=0.03	>128	0.5	4	<=1	<=0.5	>32	>1024	<=8	8	<=0.25	64	0.25	8	16	<=0.03	8	0.25	0.06	16	16	NA	NA	NA	blaCMY-2	NA
16-AB01304	2016	BfR	Germany	Germany	Livestock	Broiler_chickens	Other	Sample taken from the caecum	0	NA	NA	Microdilution	NA	64	4	2	<=0.03	64	0.25	<=2	<=1	1	<=0.25	16	<=8	4	<=0.25	32	0.06	2	1	<=0.03	2	<=0.12	<=0.015	4	4	NA	NA	NA	blaCMY-2	NA
16-AB01305	2016	BfR	Germany	Germany	Livestock	Broiler_chickens	Other	Sample taken from the caecum	0	NA	NA	Microdilution	NA	>64	4	8	<=0.03	>128	4	4	<=1	<=0.5	<=0.25	16	<=8	4	<=0.25	16	1	0.06	0.25	<=0.03	8	0.25	<=0.015	8	8	NA	blaTEM-52	NA	NA	NA
16-AB01306	2016	BfR	Germany	Germany	Livestock	Broiler_chickens	Other	Sample taken from the caecum	0	NA	NA	Microdilution	NA	>64	8	2	<=0.03	128	0.25	64	<=1	<=0.5	<=0.25	>1024	<=8	4	0.5	8	4	0.06	0.12	<=0.03	4	<=0.12	<=0.015	64	1	blaCTX-M-1	NA	NA	NA	NA
16-AB01307	2016	BfR	Germany	Germany	Livestock	Broiler_chickens	Other	Sample taken from the caecum	0	NA	NA	Microdilution	NA	>64	8	8	<=0.03	16	0.03	16	<=1	<=0.5	>32	>1024	<=8	8	<=0.25	64	0.25	8	8	<=0.03	8	0.25	0.03	8	8	NA	NA	NA	blaCMY-2	NA
16-AB01308	2016	BfR	Germany	Germany	Livestock	Broiler_chickens	Other	Sample taken from the caecum	0	NA	NA	Microdilution	NA	>64	8	1	<=0.03	>128	4	64	<=1	1	>32	>1024	<=8	8	<=0.25	4	32	0.06	0.12	<=0.03	4	<=0.12	<=0.015	64	1	blaCTX-M-1	NA	NA	NA	NA
16-AB01309	2016	BfR	Germany	Germany	Livestock	Turkeys	Other	Sample taken from the caecum	0	NA	NA	Microdilution	NA	>64	8	1	<=0.03	>128	>8	64	4	1	>32	>1024	128	16	<=0.25	8	8	0.12	0.25	0.06	16	0.25	<=0.015	128	1	blaCTX-M-65	NA	NA	NA	NA
16-AB01310	2016	BfR	Germany	Germany	Livestock	Broiler_chickens	Other	Sample taken from the caecum	0	NA	NA	Microdilution	NA	>64	8	2	<=0.03	64	0.5	>64	<=1	2	<=0.25	>1024	<=8	8	<=0.25	16	8	0.12	0.25	<=0.03	16	0.5	<=0.015	128	2	blaCTX-M-1	NA	NA	NA	NA
16-AB01311	2016	BfR	Germany	Germany	Livestock	Broiler_chickens	Other	Sample taken from the caecum	0	NA	NA	Microdilution	NA	>64	8	2	<=0.03	>128	>8	32	8	<=0.5	>32	>1024	128	32	<=0.25	4	8	0.06	0.12	<=0.03	4	<=0.12	0.03	16	1	blaCTX-M-1	NA	NA	NA	NA
16-AB01312	2016	BfR	Germany	Germany	Livestock	Broiler_chickens	Other	Sample taken from the caecum	0	NA	NA	Microdilution	NA	>64	8	2	<=0.03	>128	1	>64	<=1	<=0.5	<=0.25	>1024	<=8	8	<=0.25	8	16	0.06	0.12	<=0.03	8	0.25	<=0.015	64	2	blaCTX-M-1	NA	NA	NA	NA
16-AB01313	2016	BfR	Germany	Germany	Livestock	Broiler_chickens	Other	Sample taken from the caecum	0	NA	NA	Microdilution	NA	>64	8	8	<=0.03	>128	0.5	>64	<=1	32	>32	>1024	128	8	0.5	64	0.12	4	8	<=0.03	4	<=0.12	0.03	8	8	NA	NA	NA	blaCMY-2	NA
16-AB01314	2016	BfR	Germany	Germany	Livestock	Broiler_chickens	Other	Sample taken from the caecum	0	NA	NA	Microdilution	NA	>64	8	8	<=0.03	<=4	<=0.015	<=2	<=1	<=0.5	0.5	>1024	64	8	<=0.25	8	1	0.06	0.25	<=0.03	4	<=0.12	<=0.015	8	8	NA	blaTEM-52	NA	NA	NA
16-AB01315	2016	BfR	Germany	Germany	Livestock	Broiler_chickens	Other	Sample taken from the caecum	0	NA	NA	Microdilution	NA	>64	8	8	<=0.03	<=4	0.25	64	<=1	2	>32	>1024	<=8	8	<=0.25	8	64	0.06	0.25	0.06	8	0.5	<=0.015	128	8	blaCTX-M-15	NA	NA	NA	NA
16-AB01316	2016	BfR	Germany	Germany	Livestock	Turkeys	Other	Sample taken from the caecum	0	NA	NA	Microdilution	NA	>64	4	8	<=0.03	32	0.5	<=2	<=1	1	0.5	>1024	64	8	<=0.25	16	2	0.06	0.12	<=0.03	8	0.25	0.03	16	16	NA	blaTEM-52	NA	NA	NA
16-AB01317	2016	BfR	Germany	Germany	Livestock	Turkeys	Other	Sample taken from the caecum	0	NA	NA	Microdilution	NA	>64	8	4	<=0.03	>128	>8	>64	<=1	1	>32	>1024	<=8	8	0.5	4	16	0.06	0.12	<=0.03	16	<=0.12	<=0.015	128	4	blaCTX-M-1	NA	NA	NA	NA
16-AB01318	2016	BfR	Germany	Germany	Livestock	Broiler_chickens	Other	Sample taken from the caecum	0	NA	NA	Microdilution	NA	>64	8	4	<=0.03	8	0.25	4	<=1	1	<=0.25	16	<=8	8	<=0.25	8	64	0.06	0.12	<=0.03	8	<=0.12	0.03	128	8	blaCTX-M-1	NA	NA	NA	NA
16-AB01319	2016	BfR	Germany	Germany	Livestock	Broiler_chickens	Other	Sample taken from the caecum	0	NA	NA	Microdilution	NA	>64	8	4	<=0.03	>128	>8	<=2	4	1	<=0.25	>1024	32	8	<=0.25	4	4	0.06	0.12	<=0.03	4	0.25	<=0.015	128	4	blaCTX-M-15	NA	NA	NA	NA
16-AB01329	2016	BfR	Germany	Germany	Livestock	Turkeys	Faeces/manure	NA	0	NA	NA	Microdilution	NA	>64	2	4	<=0.03	<=4	<=0.015	<=2	<=1	1	<=0.25	<=8	<=8	8	<=0.25	8	0.25	0.06	0.25	<=0.03	8	<=0.12	<=0.015	2	2	NA	blaTEM-52	NA	NA	NA
16-AB01331	2016	BfR	Germany	Germany	Livestock	Broiler_chickens	Faeces/manure	NA	0	NA	NA	Microdilution	NA	>64	8	8	<=0.03	<=4	0.03	8	4	1	<=0.25	16	<=8	8	<=0.25	64	0.12	4	8	<=0.03	8	<=0.12	0.03	8	8	NA	NA	NA	blaCMY-2	NA
16-AB01332	2016	BfR	Germany	Germany	Livestock	Turkeys	Faeces/manure	NA	0	NA	NA	Microdilution	NA	>64	8	8	<=0.03	8	0.5	64	<=1	<=0.5	>32	>1024	<=8	8	<=0.25	8	32	0.06	0.25	<=0.03	8	0.25	<=0.015	128	8	blaCTX-M-15	NA	NA	NA	NA
16-AB01333	2016	BfR	Germany	Germany	Livestock	Broiler_chickens	Meat	NA	0	NA	NA	Microdilution	NA	>64	8	2	<=0.03	>128	>8	64	<=1	32	>32	>1024	<=8	4	<=0.25	8	1	0.06	0.12	<=0.03	8	0.5	<=0.015	16	2	NA	NA	blaSHV-2	NA	NA
16-AB01334	2016	BfR	Germany	Germany	Livestock	Broiler_chickens	Meat	NA	0	NA	NA	Microdilution	NA	>64	8	4	<=0.03	>128	8	>64	<=1	16	>32	>1024	<=8	8	<=0.25	8	64	0.12	0.25	<=0.03	4	0.25	0.06	128	2	blaCTX-M-2, blaCTX-M-15	NA	NA	NA	NA
16-AB01338	2016	BfR	Germany	Germany	Livestock	Turkeys	Faeces/manure	NA	0	NA	NA	Microdilution	NA	>64	4	16	<=0.03	<=4	0.5	>64	<=1	<=0.5	>32	>1024	<=8	8	<=0.25	8	0.5	0.06	0.25	<=0.03	8	0.25	<=0.015	8	32	NA	NA	blaSHV-12	NA	NA
16-AB01341	2016	BfR	Germany	Germany	Livestock	Broiler_chickens	Faeces/manure	NA	0	NA	NA	Microdilution	NA	>64	4	8	<=0.03	<=4	<=0.015	4	<=1	1	0.5	<=8	<=8	8	<=0.25	4	1	0.06	0.12	<=0.03	8	<=0.12	<=0.015	4	4	NA	blaTEM-52	NA	NA	NA
16-AB01343	2016	BfR	Germany	Germany	Livestock	Turkeys	Faeces/manure	NA	0	NA	NA	Microdilution	NA	>64	8	2	<=0.03	<=4	<=0.015	32	<=1	1	2	>1024	<=8	4	<=0.25	8	8	0.06	0.25	<=0.03	4	0.25	0.03	32	2	blaCTX-M-1	NA	NA	NA	NA
16-AB01346	2016	BfR	Germany	Germany	Livestock	Turkeys	Faeces/manure	NA	0	NA	NA	Microdilution	NA	>64	8	16	<=0.03	>128	>8	>64	<=1	<=0.5	1	>1024	16	16	0.5	16	16	0.12	0.5	<=0.03	16	<=0.12	<=0.015	128	16	blaCTX-M-15	NA	NA	NA	NA
16-AB01349	2016	BfR	Germany	Germany	Livestock	Broiler_chickens	Faeces/manure	NA	0	NA	NA	Microdilution	NA	>64	8	16	<=0.03	>128	8	64	<=1	1	0.5	>1024	>128	8	<=0.25	64	0.12	8	8	<=0.03	4	0.25	0.03	8	8	NA	NA	NA	blaCMY-2	NA
16-AB01354	2016	BfR	Germany	Germany	Livestock	Turkeys	Faeces/manure	NA	0	NA	NA	Microdilution	NA	>64	8	8	<=0.03	64	0.12	64	<=1	1	<=0.25	>1024	<=8	8	0.5	128	1	16	8	<=0.03	16	0.25	0.12	16	8	NA	NA	NA	blaCMY-2	NA
16-AB01364	2016	BfR	Germany	Germany	Livestock	Turkeys	Faeces/manure	NA	0	NA	NA	Microdilution	NA	>64	2	2	<=0.03	>128	0.25	<=2	<=1	<=0.5	>32	>1024	<=8	8	<=0.25	8	0.25	0.06	0.25	<=0.03	8	0.25	<=0.015	4	2	NA	blaTEM-52	NA	NA	NA
16-AB01369	2016	BfR	Germany	Germany	Livestock	Turkeys	Meat	NA	0	NA	NA	Microdilution	NA	>64	8	8	<=0.03	>128	>8	>64	<=1	2	<=0.25	<=8	<=8	16	<=0.25	8	16	0.06	0.25	<=0.03	16	<=0.12	<=0.015	128	8	blaCTX-M-1	NA	NA	NA	NA
16-AB01374	2016	BfR	Germany	Germany	Livestock	Turkeys	Meat	NA	0	NA	NA	Microdilution	NA	>64	1	2	<=0.03	<=4	<=0.015	>64	<=1	<=0.5	<=0.25	<=8	<=8	8	0.5	16	0.12	0.5	2	<=0.03	4	0.25	<=0.015	1	2	NA	blaTEM-52, blaTEM-106	NA	NA	NA
16-AB01375	2016	BfR	Germany	Germany	Livestock	Broiler_chickens	Meat	NA	0	NA	NA	Microdilution	NA	>64	8	16	<=0.03	16	0.5	>64	<=1	>32	<=0.25	>1024	128	8	<=0.25	128	0.25	8	8	<=0.03	16	0.25	0.12	32	16	NA	NA	NA	blaCMY-2	NA
16-AB01380	2016	BfR	Germany	Germany	Livestock	Broiler_chickens	Other	Sample taken from the caecum	0	NA	NA	Microdilution	NA	>64	2	4	<=0.03	<=4	0.03	<=2	<=1	<=0.5	0.5	16	<=8	16	<=0.25	8	0.5	0.06	0.25	<=0.03	8	0.25	<=0.015	2	8	NA	blaTEM-52	NA	NA	NA
16-AB01384	2016	BfR	Germany	Germany	Livestock	Broiler_chickens	Other	Sample taken from the caecum	0	NA	NA	Microdilution	NA	>64	8	8	<=0.03	8	0.5	4	<=1	1	0.5	16	<=8	8	<=0.25	4	0.25	0.06	0.12	<=0.03	4	<=0.12	<=0.015	8	16	NA	NA	blaSHV-12	NA	NA
16-AB01389	2016	BfR	Germany	Germany	Livestock	Broiler_chickens	Other	Sample taken from the caecum	0	NA	NA	Microdilution	NA	>64	8	8	<=0.03	8	0.25	<=2	<=1	<=0.5	<=0.25	<=8	<=8	4	<=0.25	8	0.25	0.06	0.12	0.06	4	<=0.12	<=0.015	4	8	NA	NA	blaSHV-12	NA	NA
16-AB01391	2016	BfR	Germany	Germany	Livestock	Broiler_chickens	Other	Sample taken from the caecum	0	NA	NA	Microdilution	NA	>64	8	16	<=0.03	>128	8	<=2	<=1	<=0.5	>32	>1024	32	8	<=0.25	32	2	0.12	0.25	<=0.03	8	0.25	<=0.015	32	32	NA	NA	blaSHV-12	NA	NA
16-AB01392	2016	BfR	Germany	Germany	Livestock	Broiler_chickens	Meat	NA	0	NA	NA	Microdilution	NA	>64	8	16	<=0.03	16	0.5	<=2	<=1	<=0.5	<=0.25	<=8	<=8	8	<=0.25	8	1	0.06	0.12	<=0.03	4	<=0.12	<=0.015	4	16	NA	NA	blaSHV-12	NA	NA
16-AB01394	2016	BfR	Germany	Germany	Livestock	Turkeys	Meat	NA	0	NA	NA	Microdilution	NA	>64	8	1	<=0.03	128	0.25	<=2	<=1	16	0.5	<=8	<=8	4	<=0.25	8	16	0.06	0.25	<=0.03	4	<=0.12	<=0.015	128	2	blaCTX-M-1	NA	NA	NA	NA
16-AB01404	2016	BfR	Germany	Germany	Livestock	Broiler_chickens	Other	Sample taken from the caecum	0	NA	NA	Microdilution	NA	>64	8	16	<=0.03	>128	>8	<=2	<=1	2	>32	>1024	<=8	4	<=0.25	64	0.25	8	8	<=0.03	8	0.25	0.06	16	8	NA	NA	NA	blaCMY-2	NA
16-AB01405	2016	BfR	Germany	Germany	Livestock	Broiler_chickens	Other	Sample taken from the caecum	0	NA	NA	Microdilution	NA	>64	8	4	<=0.03	>128	>8	>64	<=1	1	>32	>1024	<=8	64	0.5	8	16	0.12	0.25	<=0.03	8	<=0.12	0.03	64	4	blaCTX-M-1	NA	NA	NA	NA
16-AB01406	2016	BfR	Germany	Germany	Livestock	Broiler_chickens	Other	Sample taken from the caecum	0	NA	NA	Microdilution	NA	>64	8	2	<=0.03	128	0.25	<=2	<=1	<=0.5	<=0.25	>1024	<=8	8	<=0.25	8	32	0.06	0.25	<=0.03	8	<=0.12	<=0.015	32	2	blaCTX-M-1	NA	NA	NA	NA
16-AB01408	2016	BfR	Germany	Germany	Livestock	Broiler_chickens	Faeces/manure	NA	0	NA	NA	Microdilution	NA	>64	8	8	<=0.03	>128	8	>64	4	<=0.5	<=0.25	>1024	>128	32	<=0.25	4	1	0.06	0.12	<=0.03	4	<=0.12	<=0.015	4	4	NA	blaTEM-52	NA	NA	NA
16-AB01409	2016	BfR	Germany	Germany	Livestock	Broiler_chickens	Other	Sample taken from the caecum	0	NA	NA	Microdilution	NA	>64	4	8	<=0.03	128	0.5	<=2	<=1	<=0.5	>32	>1024	<=8	8	<=0.25	64	0.25	4	4	0.06	8	0.5	0.06	8	8	NA	NA	NA	blaCMY-2	NA
16-AB01414	2016	BfR	Germany	Germany	Livestock	Broiler_chickens	Other	Sample taken from the caecum	0	NA	NA	Microdilution	NA	>64	4	4	<=0.03	<=4	<=0.015	>64	<=1	<=0.5	<=0.25	<=8	<=8	8	0.5	8	0.5	0.06	0.12	<=0.03	8	<=0.12	<=0.015	4	2	NA	blaTEM-52	NA	NA	NA
16-AB01417	2016	BfR	Germany	Germany	Livestock	Broiler_chickens	Meat	NA	0	NA	NA	Microdilution	NA	>64	8	1	<=0.03	>128	0.25	<=2	<=1	<=0.5	>32	>1024	<=8	8	<=0.25	8	8	0.06	0.12	<=0.03	8	<=0.12	<=0.015	16	0.5	blaCTX-M-1	NA	NA	NA	NA
16-AB01418	2016	BfR	Germany	Germany	Livestock	Turkeys	Meat	NA	0	NA	NA	Microdilution	NA	>64	8	1	<=0.03	>128	8	<=2	<=1	1	>32	>1024	<=8	<=2	<=0.25	8	32	0.06	0.25	<=0.03	4	0.25	<=0.015	64	2	blaCTX-M-1	NA	NA	NA	NA
16-AB01419	2016	BfR	Germany	Germany	Livestock	Turkeys	Meat	NA	0	NA	NA	Microdilution	NA	>64	8	2	<=0.03	64	0.5	>64	<=1	<=0.5	>32	>1024	32	8	<=0.25	8	16	0.06	0.25	0.06	4	0.5	<=0.015	16	8	NA	blaTEM-52	NA	NA	NA
16-AB01427	2016	BfR	Germany	Germany	Livestock	Broiler_chickens	Meat	NA	0	NA	NA	Microdilution	NA	>64	8	16	<=0.03	128	0.25	<=2	<=1	1	<=0.25	>1024	<=8	4	<=0.25	8	2	0.06	0.12	<=0.03	4	<=0.12	<=0.015	16	64	NA	NA	blaSHV-12	NA	NA
16-AB01429	2016	BfR	Germany	Germany	Livestock	Broiler_chickens	Meat	NA	0	NA	NA	Microdilution	NA	>64	8	16	<=0.03	>128	0.5	<=2	<=1	1	<=0.25	<=8	<=8	4	<=0.25	2	2	0.06	0.12	<=0.03	4	0.25	<=0.015	8	32	NA	NA	blaSHV-12	NA	NA
16-AB01431	2016	BfR	Germany	Germany	Livestock	Broiler_chickens	Meat	NA	0	NA	NA	Microdilution	NA	>64	8	16	<=0.03	>128	0.5	4	<=1	1	>32	>1024	128	8	0.5	16	4	0.06	0.12	<=0.03	4	0.25	0.03	16	64	NA	NA	blaSHV-12	NA	NA
16-AB01433	2016	BfR	Germany	Germany	Livestock	Broiler_chickens	Meat	NA	0	NA	NA	Microdilution	NA	>64	8	1	<=0.03	>128	0.5	<=2	<=1	<=0.5	>32	>1024	<=8	8	<=0.25	8	8	0.06	0.12	<=0.03	8	0.25	<=0.015	16	1	blaCTX-M-1	NA	NA	NA	NA
16-AB01435	2016	BfR	Germany	Germany	Livestock	Broiler_chickens	Meat	NA	0	NA	NA	Microdilution	NA	>64	2	8	<=0.03	64	0.25	<=2	<=1	<=0.5	<=0.25	<=8	<=8	4	<=0.25	32	0.12	4	4	<=0.03	4	0.25	0.03	8	4	NA	NA	NA	blaCMY-2	NA
16-AB01436	2016	BfR	Germany	Germany	Livestock	Broiler_chickens	Meat	NA	0	NA	NA	Microdilution	NA	>64	8	1	<=0.03	>128	1	>64	<=1	<=0.5	>32	>1024	<=8	8	<=0.25	8	32	0.06	0.25	<=0.03	8	0.25	0.03	64	2	blaCTX-M-1	NA	NA	NA	NA
16-AB01437	2016	BfR	Germany	Germany	Livestock	Broiler_chickens	Meat	NA	0	NA	NA	Microdilution	NA	>64	2	8	<=0.03	>128	4	<=2	<=1	<=0.5	<=0.25	<=8	<=8	8	<=0.25	4	0.25	0.06	0.12	<=0.03	8	0.25	<=0.015	2	16	NA	NA	blaSHV-12	NA	NA
16-AB01438	2016	BfR	Germany	Germany	Livestock	Broiler_chickens	Meat	NA	0	NA	NA	Microdilution	NA	>64	8	8	0.06	>128	8	<=2	<=1	<=0.5	>32	>1024	<=8	4	<=0.25	64	1	8	4	<=0.03	4	0.25	0.06	16	4	NA	NA	NA	blaCMY-2	NA
16-AB01439	2016	BfR	Germany	Germany	Livestock	Broiler_chickens	Meat	NA	0	NA	NA	Microdilution	NA	>64	8	8	<=0.03	<=4	<=0.015	>64	<=1	16	<=0.25	>1024	<=8	4	<=0.25	64	0.25	8	4	<=0.03	8	0.25	0.03	8	8	NA	NA	NA	blaCMY-2	NA
16-AB01440	2016	BfR	Germany	Germany	Livestock	Broiler_chickens	Meat	NA	0	NA	NA	Microdilution	NA	>64	8	0.5	<=0.03	128	0.5	8	<=1	1	>32	>1024	<=8	64	<=0.25	4	8	0.06	0.12	<=0.03	4	0.25	<=0.015	32	0.5	blaCTX-M-14	NA	NA	NA	NA
16-AB01441	2016	BfR	Germany	Germany	Fruit_vegetables	Vegetables	Sprouts	NA	0	NA	NA	Microdilution	NA	>64	8	16	<=0.03	>128	4	>64	<=1	1	>32	>1024	>128	8	<=0.25	16	64	0.12	0.25	<=0.03	16	0.25	0.12	128	16	blaCTX-M-15	NA	NA	NA	NA
16-AB01447	2016	BfR	Germany	Germany	Livestock	Broiler_chickens	Meat	NA	0	NA	NA	Microdilution	NA	>64	8	1	<=0.03	>128	0.25	<=2	<=1	1	>32	>1024	<=8	8	<=0.25	4	64	0.06	0.12	<=0.03	8	<=0.12	<=0.015	32	1	blaCTX-M-1	NA	NA	NA	NA
16-AB01449	2016	BfR	Germany	Germany	Livestock	Turkeys	Meat	NA	0	NA	NA	Microdilution	NA	>64	8	16	<=0.03	8	0.5	>64	<=1	<=0.5	<=0.25	>1024	32	8	<=0.25	8	1	0.06	0.12	<=0.03	8	<=0.12	<=0.015	8	8	NA	blaTEM-20, blaTEM-52	NA	NA	NA
16-AB01461	2016	BfR	Germany	Germany	Livestock	Turkeys	Other	Sample taken from the caecum	0	NA	NA	Microdilution	NA	>64	8	16	<=0.03	16	0.5	>64	<=1	<=0.5	<=0.25	>1024	64	8	0.5	8	2	0.12	0.25	<=0.03	16	0.25	<=0.015	16	64	NA	NA	blaSHV-12	NA	NA
16-AB01463	2016	BfR	Germany	Germany	Livestock	Broiler_chickens	Other	Sample taken from the caecum	0	NA	NA	Microdilution	NA	>64	2	16	<=0.03	<=4	0.25	64	<=1	<=0.5	<=0.25	<=8	<=8	8	<=0.25	4	0.5	0.06	0.12	<=0.03	8	<=0.12	<=0.015	4	8	NA	NA	blaSHV-12	NA	NA
16-AB01465	2016	BfR	Germany	Germany	Livestock	Broiler_chickens	Other	Sample taken from the caecum	0	NA	NA	Microdilution	NA	>64	8	1	<=0.03	32	0.12	32	<=1	2	<=0.25	>1024	<=8	4	<=0.25	2	2	0.06	0.12	<=0.03	4	0.25	<=0.015	16	0.5	blaCTX-M-1	NA	NA	NA	NA
16-AB01477	2016	BfR	Germany	Germany	Livestock	Broiler_chickens	Meat	NA	0	NA	NA	Microdilution	NA	>64	1	1	<=0.03	<=4	<=0.015	<=2	<=1	<=0.5	<=0.25	<=8	<=8	8	<=0.25	8	0.12	0.06	0.12	<=0.03	4	0.25	<=0.015	0.5	1	NA	blaTEM-52	NA	NA	NA
16-AB01478	2016	BfR	Germany	Germany	Livestock	Turkeys	Faeces/manure	NA	0	NA	NA	Microdilution	NA	>64	8	1	<=0.03	128	0.25	>64	<=1	<=0.5	>32	>1024	<=8	8	<=0.25	8	4	0.06	0.25	<=0.03	8	0.25	<=0.015	16	1	blaCTX-M-1	NA	NA	NA	NA
16-AB01479	2016	BfR	Germany	Germany	Livestock	Turkeys	Other	Sample taken from the caecum	0	NA	NA	Microdilution	NA	>64	8	1	<=0.03	<=4	<=0.015	<=2	<=1	<=0.5	>32	>1024	<=8	8	<=0.25	4	32	0.06	0.25	<=0.03	4	<=0.12	<=0.015	32	4	blaCTX-M-1	NA	NA	NA	NA
16-AB01480	2016	BfR	Germany	Germany	Livestock	Broiler_chickens	Meat	NA	0	NA	NA	Microdilution	NA	>64	8	0.5	<=0.03	>128	0.5	64	<=1	<=0.5	<=0.25	>1024	<=8	4	<=0.25	4	16	0.06	0.12	<=0.03	4	0.25	<=0.015	64	1	blaCTX-M-14, blaCTX-M-15	NA	NA	NA	NA
16-AB01482	2016	BfR	Germany	Germany	Livestock	Broiler_chickens	Meat	NA	0	NA	NA	Microdilution	NA	>64	8	16	<=0.03	128	0.25	<=2	<=1	1	>32	>1024	64	8	<=0.25	4	2	0.06	0.12	<=0.03	8	0.25	<=0.015	16	64	NA	NA	blaSHV-12	NA	NA
16-AB01483	2016	BfR	Germany	Germany	Livestock	Turkeys	Meat	NA	0	NA	NA	Microdilution	NA	>64	8	4	<=0.03	>128	>8	>64	<=1	<=0.5	<=0.25	>1024	<=8	8	<=0.25	8	4	0.06	0.25	<=0.03	4	<=0.12	<=0.015	64	4	blaCTX-M-15	NA	NA	NA	NA
16-AB01484	2016	BfR	Germany	Germany	Livestock	Broiler_chickens	Meat	NA	0	NA	NA	Microdilution	NA	>64	8	16	<=0.03	128	2	<=2	<=1	8	<=0.25	<=8	<=8	16	<=0.25	8	0.5	0.06	0.12	<=0.03	8	0.25	<=0.015	8	16	NA	NA	blaSHV-12	NA	NA
16-AB01500	2016	BfR	Germany	Germany	Livestock	Broiler_chickens	Meat	NA	0	NA	NA	Microdilution	NA	>64	8	0.5	<=0.03	>128	8	32	<=1	<=0.5	<=0.25	>1024	<=8	4	<=0.25	4	4	0.06	0.12	<=0.03	2	0.25	<=0.015	16	0.5	blaCTX-M-1	NA	NA	NA	NA
16-AB01501	2016	BfR	Germany	Germany	Livestock	Turkeys	Meat	NA	0	NA	NA	Microdilution	NA	>64	8	1	<=0.03	>128	>8	4	<=1	<=0.5	<=0.25	>1024	<=8	8	<=0.25	16	16	0.06	0.12	<=0.03	8	<=0.12	0.03	64	1	blaCTX-M-1	NA	NA	NA	NA
16-AB01503	2016	BfR	Germany	Germany	Livestock	Turkeys	Meat	NA	0	NA	NA	Microdilution	NA	>64	8	16	<=0.03	>128	>8	>64	<=1	1	>32	>1024	64	8	0.5	4	2	0.12	0.25	<=0.03	8	0.25	<=0.015	8	16	NA	blaTEM-52	NA	NA	NA
16-AB01504	2016	BfR	Germany	Germany	Livestock	Broiler_chickens	Meat	NA	0	NA	NA	Microdilution	NA	>64	8	8	<=0.03	128	0.5	>64	<=1	32	<=0.25	>1024	<=8	4	0.5	64	0.25	8	8	<=0.03	4	0.25	0.06	8	8	NA	NA	NA	blaCMY-2	NA
16-AB01505	2016	BfR	Germany	Germany	Livestock	Broiler_chickens	Meat	NA	0	NA	NA	Microdilution	NA	>64	8	16	<=0.03	8	0.25	>64	<=1	<=0.5	>32	>1024	<=8	4	<=0.25	64	0.25	8	8	<=0.03	8	<=0.12	0.06	16	8	NA	NA	NA	blaCMY-2	NA
16-AB01506	2016	BfR	Germany	Germany	Livestock	Broiler_chickens	Meat	NA	0	NA	NA	Microdilution	NA	>64	8	0.5	<=0.03	<=4	<=0.015	<=2	<=1	<=0.5	>32	>1024	<=8	8	<=0.25	4	8	0.06	0.12	<=0.03	4	0.25	0.03	32	0.5	blaCTX-M-1	NA	NA	NA	NA
16-AB01507	2016	BfR	Germany	Germany	Livestock	Broiler_chickens	Meat	NA	0	NA	NA	Microdilution	NA	>64	8	2	<=0.03	128	0.25	>64	<=1	<=0.5	>32	>1024	>128	8	<=0.25	4	8	0.06	0.25	<=0.03	4	<=0.12	<=0.015	32	2	blaCTX-M-1	NA	NA	NA	NA
16-AB01516	2016	BfR	Germany	Germany	Livestock	Broiler_chickens	Other	Sample taken from the caecum	0	NA	NA	Microdilution	NA	>64	8	4	<=0.03	<=4	<=0.015	<=2	<=1	1	>32	>1024	<=8	8	<=0.25	4	1	0.06	0.12	<=0.03	4	0.25	<=0.015	8	8	NA	blaTEM-52	NA	NA	NA
16-AB01518	2016	BfR	Germany	Germany	Livestock	Broiler_chickens	Meat	NA	0	NA	NA	Microdilution	NA	>64	2	2	<=0.03	>128	8	<=2	<=1	1	<=0.25	<=8	<=8	4	<=0.25	8	0.25	0.06	0.25	<=0.03	4	0.25	<=0.015	2	2	NA	blaTEM-52	NA	NA	NA
16-AB01521	2016	BfR	Germany	Germany	Livestock	Broiler_chickens	Meat	NA	0	NA	NA	Microdilution	NA	>64	8	2	<=0.03	>128	8	>64	<=1	<=0.5	>32	>1024	<=8	8	<=0.25	4	64	0.06	0.12	<=0.03	4	<=0.12	<=0.015	32	2	blaCTX-M-1	NA	NA	NA	NA
16-AB01526	2016	BfR	Germany	Germany	Livestock	Turkeys	Other	Sample taken from the caecum	0	NA	NA	Microdilution	NA	>64	8	8	<=0.03	8	0.5	>64	<=1	<=0.5	<=0.25	>1024	32	4	<=0.25	8	8	0.06	0.12	<=0.03	4	<=0.12	0.03	64	8	blaCTX-M-15	NA	NA	NA	NA
16-AB01537	2016	BfR	Germany	Germany	Livestock	Broiler_chickens	Meat	NA	0	NA	NA	Microdilution	NA	>64	4	2	<=0.03	>128	8	<=2	<=1	<=0.5	<=0.25	<=8	<=8	8	<=0.25	8	0.25	0.06	0.12	<=0.03	8	<=0.12	<=0.015	2	2	NA	blaTEM-52	NA	NA	NA
16-AB01538	2016	BfR	Germany	Germany	Livestock	Broiler_chickens	Meat	NA	0	NA	NA	Microdilution	NA	>64	8	16	<=0.03	>128	>8	<=2	<=1	<=0.5	<=0.25	<=8	<=8	4	<=0.25	8	4	0.06	0.25	<=0.03	8	<=0.12	<=0.015	16	16	NA	blaTEM-52	NA	NA	NA
16-AB01539	2016	BfR	Germany	Germany	Livestock	Broiler_chickens	Meat	NA	0	NA	NA	Microdilution	NA	>64	8	16	<=0.03	>128	0.5	>64	<=1	>32	0.5	>1024	<=8	4	<=0.25	64	0.5	4	8	0.06	8	0.5	0.06	8	8	NA	NA	NA	blaCMY-2	NA
16-AB01540	2016	BfR	Germany	Germany	Livestock	Broiler_chickens	Meat	NA	0	NA	NA	Microdilution	NA	>64	8	2	<=0.03	128	0.25	<=2	<=1	1	<=0.25	>1024	<=8	8	<=0.25	8	8	0.06	0.25	<=0.03	8	0.25	<=0.015	32	2	blaCTX-M-1	NA	NA	NA	NA
16-AB01541	2016	BfR	Germany	Germany	Livestock	Broiler_chickens	Meat	NA	0	NA	NA	Microdilution	NA	>64	4	16	<=0.03	64	0.12	<=2	<=1	<=0.5	0.5	>1024	32	8	<=0.25	4	0.25	0.06	0.12	<=0.03	4	<=0.12	<=0.015	4	8	NA	NA	blaSHV-12	NA	NA
16-AB01542	2016	BfR	Germany	Germany	Livestock	Broiler_chickens	Meat	NA	0	NA	NA	Microdilution	NA	>64	8	16	<=0.03	8	0.5	<=2	<=1	<=0.5	<=0.25	<=8	<=8	8	<=0.25	4	0.5	0.06	0.12	<=0.03	4	<=0.12	<=0.015	4	16	NA	NA	blaSHV-12	NA	NA
16-AB01543	2016	BfR	Germany	Germany	Livestock	Broiler_chickens	Meat	NA	0	NA	NA	Microdilution	NA	>64	8	16	<=0.03	<=4	<=0.015	<=2	<=1	<=0.5	<=0.25	16	<=8	8	<=0.25	128	0.5	8	8	<=0.03	8	0.25	0.06	16	16	NA	NA	NA	blaCMY-2	NA
16-AB01544	2016	BfR	Germany	Germany	Livestock	Broiler_chickens	Meat	NA	0	NA	NA	Microdilution	NA	>64	8	16	<=0.03	8	0.25	>64	<=1	<=0.5	>32	>1024	128	8	<=0.25	4	4	0.06	0.25	<=0.03	8	0.25	<=0.015	32	64	NA	NA	blaSHV-12	NA	NA
16-AB01549	2016	BfR	Germany	Germany	Livestock	Turkeys	Meat	NA	0	NA	NA	Microdilution	NA	>64	8	1	<=0.03	<=4	0.03	<=2	<=1	<=0.5	<=0.25	<=8	<=8	4	<=0.25	8	64	0.06	0.25	<=0.03	4	<=0.12	<=0.015	128	2	blaCTX-M-1	NA	NA	NA	NA
16-AB01552	2016	BfR	Germany	Germany	Livestock	Broiler_chickens	Meat	NA	0	NA	NA	Microdilution	NA	>64	8	0.5	<=0.03	<=4	<=0.015	16	<=1	<=0.5	<=0.25	>1024	<=8	4	<=0.25	2	4	0.06	0.12	<=0.03	4	0.25	<=0.015	8	1	blaCTX-M-1	NA	NA	NA	NA
16-AB01553	2016	BfR	Germany	Germany	Livestock	Turkeys	Meat	NA	0	NA	NA	Microdilution	NA	>64	8	4	<=0.03	>128	>8	<=2	4	<=0.5	<=0.25	<=8	<=8	4	<=0.25	4	4	0.06	0.12	<=0.03	8	<=0.12	<=0.015	64	4	blaCTX-M-15	NA	NA	NA	NA
16-AB01554	2016	BfR	Germany	Germany	Livestock	Turkeys	Meat	NA	0	NA	NA	Microdilution	NA	>64	8	4	<=0.03	>128	>8	<=2	4	<=0.5	<=0.25	<=8	<=8	8	<=0.25	8	16	0.06	0.12	<=0.03	16	0.25	<=0.015	32	4	blaCTX-M-15	NA	NA	NA	NA
16-AB01555	2016	BfR	Germany	Germany	Livestock	Broiler_chickens	Meat	NA	0	NA	NA	Microdilution	NA	>64	4	8	<=0.03	128	1	>64	<=1	>32	<=0.25	>1024	<=8	4	<=0.25	64	0.25	4	8	<=0.03	4	0.25	0.03	8	8	NA	NA	NA	blaCMY-2	NA
16-AB01556	2016	BfR	Germany	Germany	Livestock	Broiler_chickens	Meat	NA	0	NA	NA	Microdilution	NA	>64	8	4	<=0.03	>128	8	>64	<=1	1	>32	>1024	64	4	<=0.25	4	1	0.06	0.25	<=0.03	4	0.25	0.03	8	4	NA	blaTEM-20	NA	NA	NA
16-AB01557	2016	BfR	Germany	Germany	Livestock	Turkeys	Meat	NA	0	NA	NA	Microdilution	NA	>64	8	0.5	<=0.03	>128	8	>64	<=1	32	>32	>1024	<=8	16	<=0.25	4	8	0.06	0.12	<=0.03	4	0.25	<=0.015	32	0.5	blaCTX-M-3	NA	NA	NA	NA
16-AB01571	2016	BfR	Germany	Germany	Livestock	Broiler_chickens	Meat	NA	0	NA	NA	Microdilution	NA	>64	8	16	<=0.03	16	0.5	<=2	<=1	<=0.5	1	<=8	<=8	4	<=0.25	8	1	0.06	0.25	<=0.03	8	0.5	<=0.015	8	32	NA	NA	blaSHV-12	NA	NA
16-AB01584	2016	BfR	Germany	Germany	Livestock	Turkeys	Meat	NA	0	NA	NA	Microdilution	NA	>64	8	4	<=0.03	>128	>8	64	<=1	<=0.5	<=0.25	>1024	64	4	<=0.25	4	8	0.06	0.12	<=0.03	4	<=0.12	<=0.015	16	2	blaCTX-M-15	NA	NA	NA	NA
16-AB01588	2016	BfR	Germany	Germany	Livestock	Broiler_chickens	Other	Sample taken from the caecum	0	NA	NA	Microdilution	NA	>64	8	16	<=0.03	16	0.5	<=2	<=1	4	<=0.25	16	<=8	8	<=0.25	4	4	0.06	0.12	<=0.03	4	<=0.12	<=0.015	16	32	NA	NA	blaSHV-12	NA	NA
16-AB01590	2016	BfR	Germany	Germany	Livestock	Broiler_chickens	Other	Sample taken from the caecum	0	NA	NA	Microdilution	NA	>64	4	16	<=0.03	8	0.5	64	<=1	<=0.5	<=0.25	<=8	<=8	4	<=0.25	8	0.5	0.06	0.12	<=0.03	8	<=0.12	<=0.015	4	16	NA	NA	blaSHV-12	NA	NA
16-AB01591	2016	BfR	Germany	Germany	Livestock	Broiler_chickens	Meat	NA	0	NA	NA	Microdilution	NA	>64	8	16	<=0.03	<=4	<=0.015	64	<=1	32	<=0.25	>1024	<=8	4	<=0.25	64	0.25	8	4	<=0.03	8	0.25	0.03	8	8	NA	NA	NA	blaCMY-2	NA
16-AB01592	2016	BfR	Germany	Germany	Livestock	Broiler_chickens	Meat	NA	0	NA	NA	Microdilution	NA	>64	8	1	<=0.03	>128	8	>64	<=1	<=0.5	<=0.25	>1024	<=8	8	<=0.25	8	16	0.06	0.25	<=0.03	8	<=0.12	<=0.015	32	1	blaCTX-M-1	NA	NA	NA	NA
16-AB01594	2016	BfR	Germany	Germany	Livestock	Broiler_chickens	Meat	NA	0	NA	NA	Microdilution	NA	>64	8	4	0.06	<=4	<=0.015	64	<=1	2	<=0.25	>1024	<=8	8	<=0.25	8	4	0.06	0.25	0.06	32	<=0.12	0.12	16	8	blaCTX-M-1	NA	NA	NA	NA
16-AB01595	2016	BfR	Germany	Germany	Livestock	Broiler_chickens	Meat	NA	0	NA	NA	Microdilution	NA	>64	1	1	<=0.03	>128	1	<=2	<=1	<=0.5	>32	<=8	<=8	8	0.5	4	0.5	0.06	0.12	<=0.03	4	<=0.12	<=0.015	1	1	NA	blaTEM-52	NA	NA	NA
16-AB01597	2016	BfR	Germany	Germany	Livestock	Broiler_chickens	Meat	NA	0	NA	NA	Microdilution	NA	>64	8	8	<=0.03	8	0.5	<=2	<=1	1	<=0.25	<=8	<=8	8	<=0.25	4	0.25	0.06	0.12	<=0.03	4	<=0.12	<=0.015	4	32	NA	NA	blaSHV-12	NA	NA
16-AB01599	2016	BfR	Germany	Germany	Livestock	Broiler_chickens	Meat	NA	0	NA	NA	Microdilution	NA	>64	8	16	<=0.03	>128	2	>64	<=1	1	<=0.25	<=8	<=8	8	<=0.25	8	0.5	0.06	0.12	<=0.03	8	<=0.12	<=0.015	16	16	NA	NA	blaSHV-12	NA	NA
16-AB01600	2016	BfR	Germany	Germany	Livestock	Broiler_chickens	Meat	NA	0	NA	NA	Microdilution	NA	>64	8	8	<=0.03	>128	>8	>64	<=1	<=0.5	0.5	>1024	16	8	1	16	8	0.12	0.5	<=0.03	16	<=0.12	<=0.015	128	8	blaCTX-M-1	NA	NA	NA	NA
16-AB01601	2016	BfR	Germany	Germany	Livestock	Broiler_chickens	Meat	NA	0	NA	NA	Microdilution	NA	>64	8	16	<=0.03	128	0.25	64	<=1	16	<=0.25	>1024	<=8	4	<=0.25	64	0.25	8	8	<=0.03	8	0.25	0.03	8	8	NA	NA	NA	blaCMY-2	NA
16-AB01602	2016	BfR	Germany	Germany	Livestock	Broiler_chickens	Meat	NA	0	NA	NA	Microdilution	NA	>64	8	8	<=0.03	<=4	<=0.015	<=2	<=1	1	<=0.25	32	<=8	4	<=0.25	8	2	0.06	0.25	<=0.03	8	0.25	<=0.015	4	8	NA	blaTEM-52	NA	NA	NA
16-AB01603	2016	BfR	Germany	Germany	Livestock	Broiler_chickens	Meat	NA	0	NA	NA	Microdilution	NA	>64	8	0.5	<=0.03	<=4	<=0.015	16	<=1	<=0.5	<=0.25	>1024	<=8	4	<=0.25	2	2	0.06	0.12	<=0.03	2	0.25	<=0.015	16	1	blaCTX-M-15	NA	NA	NA	NA
16-AB01606	2016	BfR	Germany	Germany	Livestock	Broiler_chickens	Meat	NA	0	NA	NA	Microdilution	NA	>64	8	16	<=0.03	<=4	0.03	<=2	<=1	>32	<=0.25	16	<=8	4	0.5	128	0.25	8	16	0.06	8	0.5	0.06	16	16	NA	NA	NA	blaCMY-2	NA
16-AB01607	2016	BfR	Germany	Germany	Livestock	Broiler_chickens	Meat	NA	0	NA	NA	Microdilution	NA	>64	4	16	<=0.03	16	1	4	<=1	16	<=0.25	<=8	16	16	<=0.25	16	1	0.06	0.12	<=0.03	8	<=0.12	<=0.015	4	32	NA	NA	blaSHV-12	NA	NA
16-AB01608	2016	BfR	Germany	Germany	Livestock	Broiler_chickens	Meat	NA	0	NA	NA	Microdilution	NA	>64	0.5	0.5	<=0.03	<=4	<=0.015	<=2	<=1	<=0.5	<=0.25	<=8	<=8	8	0.5	4	0.06	0.06	0.12	<=0.03	4	<=0.12	<=0.015	0.5	0.25	NA	blaTEM-52	NA	NA	NA
16-AB01609	2016	BfR	Germany	Germany	Livestock	Broiler_chickens	Meat	NA	0	NA	NA	Microdilution	NA	>64	1	1	<=0.03	>128	0.25	<=2	<=1	<=0.5	<=0.25	16	<=8	4	<=0.25	8	0.25	0.06	0.12	<=0.03	4	<=0.12	<=0.015	1	2	NA	blaTEM-52	NA	NA	NA
16-AB01610	2016	BfR	Germany	Germany	Livestock	Broiler_chickens	Meat	NA	0	NA	NA	Microdilution	NA	>64	8	8	<=0.03	<=4	<=0.015	64	<=1	<=0.5	>32	>1024	<=8	8	0.5	4	1	0.06	0.12	<=0.03	4	<=0.12	<=0.015	4	8	NA	blaTEM-52	NA	NA	NA
16-AB01687	2016	BfR	Germany	Germany	Livestock	Broiler_chickens	Other	Sample taken from the caecum	0	NA	NA	Microdilution	NA	>64	8	16	<=0.03	>128	>8	64	<=1	<=0.5	>32	>1024	<=8	64	<=0.25	8	32	0.06	0.25	<=0.03	8	0.25	0.06	128	8	blaCTX-M-15	NA	NA	NA	NA
16-AB01688	2016	BfR	Germany	Germany	Livestock	Turkeys	Other	Sample taken from the caecum	0	NA	NA	Microdilution	NA	>64	8	16	<=0.03	128	0.25	64	<=1	<=0.5	>32	>1024	<=8	8	0.5	8	16	0.06	0.25	<=0.03	16	<=0.12	0.03	64	8	blaCTX-M-15	NA	NA	NA	NA
16-AB01689	2016	BfR	Germany	Germany	Livestock	Turkeys	Other	Sample taken from the caecum	0	NA	NA	Microdilution	NA	>64	8	1	<=0.03	128	0.25	<=2	<=1	16	0.5	<=8	<=8	4	<=0.25	8	4	0.06	0.12	<=0.03	4	<=0.12	<=0.015	32	2	blaCTX-M-1	NA	NA	NA	NA
16-AB01692	2016	BfR	Germany	Germany	Livestock	Turkeys	Other	Sample taken from the caecum	0	NA	NA	Microdilution	NA	>64	8	8	<=0.03	16	0.5	<=2	<=1	<=0.5	0.5	>1024	64	8	0.5	8	2	0.06	0.25	0.06	8	<=0.12	<=0.015	8	8	NA	blaTEM-52	NA	NA	NA
16-AB01693	2016	BfR	Germany	Germany	Livestock	Turkeys	Other	Sample taken from the caecum	0	NA	NA	Microdilution	NA	>64	8	0.5	<=0.03	>128	8	<=2	<=1	1	<=0.25	<=8	<=8	8	<=0.25	4	8	0.06	0.12	<=0.03	4	0.25	<=0.015	16	1	blaCTX-M-1	NA	NA	NA	NA
16-AB01694	2016	BfR	Germany	Germany	Livestock	Broiler_chickens	Other	Sample taken from the caecum	0	NA	NA	Microdilution	NA	>64	8	2	<=0.03	8	0.25	<=2	<=1	<=0.5	<=0.25	>1024	32	8	0.5	8	0.5	0.06	0.12	<=0.03	4	<=0.12	<=0.015	4	2	NA	blaTEM-15	NA	NA	NA
16-AB01695	2016	BfR	Germany	Germany	Livestock	Broiler_chickens	Other	Sample taken from the caecum	0	NA	NA	Microdilution	NA	>64	8	8	<=0.03	>128	>8	>64	<=1	>32	>32	>1024	<=8	64	<=0.25	4	32	0.12	0.25	<=0.03	8	0.25	<=0.015	64	8	blaCTX-M-15	NA	NA	NA	NA
16-AB01696	2016	BfR	Germany	Germany	Livestock	Broiler_chickens	Other	Sample taken from the caecum	0	NA	NA	Microdilution	NA	64	4	8	<=0.03	<=4	0.03	<=2	<=1	1	<=0.25	<=8	<=8	4	0.5	64	0.25	4	4	<=0.03	8	0.25	0.06	8	8	NA	NA	NA	blaCMY-2	NA
16-AB01697	2016	BfR	Germany	Germany	Livestock	Broiler_chickens	Other	Sample taken from the caecum	0	NA	NA	Microdilution	NA	>64	8	4	<=0.03	8	0.25	<=2	<=1	<=0.5	<=0.25	>1024	32	4	<=0.25	8	1	0.06	0.12	<=0.03	4	0.25	0.03	4	8	NA	blaTEM-52	NA	NA	NA
16-AB01699	2016	BfR	Germany	Germany	Livestock	Broiler_chickens	Other	Sample taken from the caecum	0	NA	NA	Microdilution	NA	>64	8	0.5	<=0.03	>128	8	64	4	>32	>32	>1024	<=8	4	0.5	8	16	0.06	0.25	0.06	4	0.5	0.03	64	1	blaCTX-M-1	NA	NA	NA	NA
16-AB01700	2016	BfR	Germany	Germany	Livestock	Broiler_chickens	Other	Sample taken from the caecum	0	NA	NA	Microdilution	NA	>64	8	8	<=0.03	>128	0.5	>64	16	>32	<=0.25	>1024	32	4	0.5	8	0.5	0.06	0.12	<=0.03	4	<=0.12	<=0.015	8	8	NA	NA	blaSHV-12	NA	NA
16-AB01701	2016	BfR	Germany	Germany	Livestock	Broiler_chickens	Other	Sample taken from the caecum	0	NA	NA	Microdilution	NA	>64	8	16	<=0.03	<=4	0.03	<=2	<=1	<=0.5	<=0.25	<=8	<=8	8	<=0.25	64	0.25	8	8	0.06	8	0.5	0.06	16	8	NA	NA	NA	blaCMY-2	NA
16-AB01702	2016	BfR	Germany	Germany	Livestock	Broiler_chickens	Other	Sample taken from the caecum	0	NA	NA	Microdilution	NA	>64	8	1	<=0.03	<=4	<=0.015	4	<=1	>32	<=0.25	<=8	<=8	8	<=0.25	4	64	0.06	0.25	<=0.03	4	0.25	<=0.015	64	2	blaCTX-M-1	NA	NA	NA	NA
16-AB01703	2016	BfR	Germany	Germany	Livestock	Broiler_chickens	Other	Sample taken from the caecum	0	NA	NA	Microdilution	NA	>64	8	1	<=0.03	<=4	<=0.015	<=2	<=1	<=0.5	<=0.25	<=8	<=8	4	<=0.25	4	8	0.06	0.25	<=0.03	8	<=0.12	0.03	64	1	blaCTX-M-1	NA	NA	NA	NA
16-AB01704	2016	BfR	Germany	Germany	Livestock	Broiler_chickens	Other	Sample taken from the caecum	0	NA	NA	Microdilution	NA	>64	8	2	<=0.03	<=4	<=0.015	64	<=1	<=0.5	<=0.25	>1024	<=8	8	<=0.25	4	16	0.06	0.12	0.12	4	0.25	0.03	32	2	blaCTX-M-1	NA	NA	NA	NA
16-AB01705	2016	BfR	Germany	Germany	Livestock	Broiler_chickens	Other	Sample taken from the caecum	0	NA	NA	Microdilution	NA	>64	8	16	<=0.03	<=4	0.03	4	<=1	<=0.5	<=0.25	<=8	<=8	8	<=0.25	128	0.25	8	16	<=0.03	8	0.25	0.06	16	16	NA	NA	NA	blaCMY-2	NA
16-AB01706	2016	BfR	Germany	Germany	Livestock	Broiler_chickens	Other	Sample taken from the caecum	0	NA	NA	Microdilution	NA	>64	8	1	<=0.03	<=4	<=0.015	64	<=1	<=0.5	>32	>1024	<=8	4	<=0.25	4	16	0.06	0.12	<=0.03	8	<=0.12	0.03	64	0.5	blaCTX-M-1	NA	NA	NA	NA
16-AB01707	2016	BfR	Germany	Germany	Livestock	Broiler_chickens	Other	Sample taken from the caecum	0	NA	NA	Microdilution	NA	>64	8	2	<=0.03	<=4	0.03	>64	<=1	2	>32	>1024	<=8	8	0.5	8	0.5	0.06	0.25	<=0.03	8	0.25	<=0.015	4	4	NA	blaTEM-52	NA	NA	NA
16-AB01708	2016	BfR	Germany	Germany	Livestock	Broiler_chickens	Other	Sample taken from the caecum	0	NA	NA	Microdilution	NA	>64	8	8	<=0.03	<=4	0.03	<=2	<=1	<=0.5	<=0.25	>1024	32	4	<=0.25	64	0.25	4	4	<=0.03	4	0.25	0.03	8	8	NA	NA	NA	blaCMY-2	NA
16-AB01709	2016	BfR	Germany	Germany	Livestock	Broiler_chickens	Other	Sample taken from the caecum	0	NA	NA	Microdilution	NA	>64	8	1	<=0.03	128	0.25	>64	<=1	<=0.5	<=0.25	>1024	32	4	<=0.25	4	32	0.06	0.25	<=0.03	4	0.25	<=0.015	64	4	blaCTX-M-1	NA	NA	NA	NA
16-AB01710	2016	BfR	Germany	Germany	Livestock	Broiler_chickens	Other	Sample taken from the caecum	0	NA	NA	Microdilution	NA	>64	8	16	<=0.03	<=4	<=0.015	<=2	<=1	<=0.5	>32	>1024	<=8	4	<=0.25	128	0.25	8	8	<=0.03	4	<=0.12	0.03	16	8	NA	NA	NA	blaCMY-2	NA
16-AB01711	2016	BfR	Germany	Germany	Livestock	Turkeys	Other	Sample taken from the caecum	0	NA	NA	Microdilution	NA	>64	8	4	<=0.03	>128	>8	>64	<=1	<=0.5	<=0.25	>1024	64	8	1	8	16	0.06	0.12	<=0.03	8	0.25	0.06	32	4	blaCTX-M-15	NA	NA	NA	NA
16-AB01712	2016	BfR	Germany	Germany	Livestock	Broiler_chickens	Other	Sample taken from the caecum	0	NA	NA	Microdilution	NA	>64	8	16	<=0.03	>128	>8	>64	<=1	>32	0.5	>1024	16	8	<=0.25	16	64	0.12	0.5	<=0.03	16	0.25	0.03	128	8	blaCTX-M-55	NA	NA	NA	NA
16-AB01713	2016	BfR	Germany	Germany	Livestock	Turkeys	Other	Sample taken from the caecum	0	NA	NA	Microdilution	NA	>64	8	1	<=0.03	>128	8	<=2	<=1	<=0.5	>32	>1024	32	4	<=0.25	4	16	0.06	0.25	<=0.03	4	<=0.12	0.03	32	1	blaCTX-M-1	NA	NA	NA	NA
16-AB01714	2016	BfR	Germany	Germany	Livestock	Turkeys	Other	Sample taken from the caecum	0	NA	NA	Microdilution	NA	>64	8	4	<=0.03	>128	>8	<=2	<=1	<=0.5	0.5	<=8	<=8	4	<=0.25	16	4	0.06	0.12	<=0.03	8	<=0.12	<=0.015	16	4	blaCTX-M-15	NA	NA	NA	NA
16-AB01715	2016	BfR	Germany	Germany	Livestock	Turkeys	Other	Sample taken from the caecum	0	NA	NA	Microdilution	NA	>64	8	4	<=0.03	<=4	<=0.015	<=2	<=1	<=0.5	0.5	>1024	32	4	<=0.25	4	1	0.06	0.12	<=0.03	4	0.5	<=0.015	4	4	NA	blaTEM-52	NA	NA	NA
16-AB01716	2016	BfR	Germany	Germany	Livestock	Turkeys	Other	Sample taken from the caecum	0	NA	NA	Microdilution	NA	>64	8	4	<=0.03	>128	>8	>64	<=1	<=0.5	>32	>1024	<=8	4	<=0.25	8	4	0.06	0.12	<=0.03	4	<=0.12	<=0.015	32	4	blaCTX-M-15	NA	NA	NA	NA
16-AB01717	2016	BfR	Germany	Germany	Livestock	Broiler_chickens	Other	Sample taken from the caecum	0	NA	NA	Microdilution	NA	>64	8	8	<=0.03	<=4	0.03	>64	<=1	1	<=0.25	>1024	64	8	0.5	8	2	0.06	0.12	<=0.03	8	0.25	0.06	16	8	NA	blaTEM-52	NA	NA	NA
16-AB01718	2016	BfR	Germany	Germany	Livestock	Broiler_chickens	Other	Sample taken from the caecum	0	NA	NA	Microdilution	NA	>64	8	2	<=0.03	<=4	<=0.015	<=2	<=1	<=0.5	<=0.25	16	<=8	4	<=0.25	8	16	0.06	0.25	<=0.03	4	0.25	<=0.015	64	1	blaCTX-M-1	NA	NA	NA	NA
16-AB01719	2016	BfR	Germany	Germany	Livestock	Broiler_chickens	Other	Sample taken from the caecum	0	NA	NA	Microdilution	NA	>64	8	2	<=0.03	>128	>8	>64	<=1	<=0.5	>32	>1024	<=8	8	0.5	8	16	0.06	0.25	<=0.03	8	<=0.12	0.03	64	2	blaCTX-M-1	NA	NA	NA	NA
16-AB01720	2016	BfR	Germany	Germany	Livestock	Broiler_chickens	Other	Sample taken from the caecum	0	NA	NA	Microdilution	NA	>64	8	16	<=0.03	>128	>8	>64	<=1	1	>32	>1024	64	8	<=0.25	8	64	0.06	0.25	<=0.03	8	0.25	0.03	128	16	blaCTX-M-15	NA	NA	NA	NA
16-AB01721	2016	BfR	Germany	Germany	Livestock	Turkeys	Other	Sample taken from the caecum	0	NA	NA	Microdilution	NA	>64	8	2	<=0.03	>128	8	<=2	<=1	<=0.5	<=0.25	<=8	<=8	4	<=0.25	4	8	0.06	0.12	<=0.03	4	0.25	<=0.015	32	1	blaCTX-M-1	NA	NA	NA	NA
16-AB01734	2016	BfR	Germany	Germany	Livestock	Broiler_chickens	Faeces/manure	NA	0	NA	NA	Microdilution	NA	>64	8	16	<=0.03	<=4	<=0.015	64	<=1	<=0.5	<=0.25	<=8	<=8	8	0.5	4	32	0.06	0.25	<=0.03	16	0.25	0.03	128	8	blaCTX-M-15	NA	NA	NA	NA
16-AB01735	2016	BfR	Germany	Germany	Livestock	Turkeys	Faeces/manure	NA	0	NA	NA	Microdilution	NA	>64	8	2	<=0.03	<=4	0.03	<=2	<=1	<=0.5	<=0.25	16	<=8	4	<=0.25	8	64	0.06	1	<=0.03	8	0.25	<=0.015	64	2	blaCTX-M-1	NA	NA	NA	NA
16-AB01738	2016	BfR	Germany	Germany	Livestock	Turkeys	Faeces/manure	NA	0	NA	NA	Microdilution	NA	>64	8	16	<=0.03	<=4	<=0.015	>64	<=1	<=0.5	<=0.25	<=8	<=8	16	0.5	8	2	0.12	0.25	<=0.03	16	0.5	<=0.015	8	16	NA	blaTEM-52	NA	NA	NA
16-AB01740	2016	BfR	Germany	Germany	Livestock	Broiler_chickens	Faeces/manure	NA	0	NA	NA	Microdilution	NA	>64	2	16	<=0.03	128	0.25	<=2	<=1	<=0.5	>32	<=8	<=8	8	<=0.25	8	0.5	0.06	0.25	<=0.03	8	0.25	<=0.015	4	16	NA	NA	blaSHV-12	NA	NA
16-AB01742	2016	BfR	Germany	Germany	Livestock	Broiler_chickens	Faeces/manure	NA	0	NA	NA	Microdilution	NA	>64	4	2	<=0.03	<=4	0.03	>64	<=1	1	>32	>1024	<=8	8	0.5	8	0.25	0.06	0.25	<=0.03	16	0.25	<=0.015	4	2	NA	blaTEM-20	NA	NA	NA
16-AB01745	2016	BfR	Germany	Germany	Livestock	Broiler_chickens	Faeces/manure	NA	0	NA	NA	Microdilution	NA	>64	8	2	<=0.03	>128	8	<=2	<=1	2	<=0.25	>1024	<=8	8	<=0.25	8	16	0.06	0.25	<=0.03	8	<=0.12	<=0.015	64	2	blaCTX-M-1	NA	NA	NA	NA
16-AB01749	2016	BfR	Germany	Germany	Livestock	Turkeys	Faeces/manure	NA	0	NA	NA	Microdilution	NA	>64	8	8	<=0.03	<=4	<=0.015	<=2	<=1	<=0.5	<=0.25	<=8	<=8	8	<=0.25	8	2	0.12	0.25	<=0.03	16	0.25	0.03	8	16	NA	blaTEM-52	NA	NA	NA
16-AB01751	2016	BfR	Germany	Germany	Livestock	Broiler_chickens	Faeces/manure	NA	0	NA	NA	Microdilution	NA	>64	8	4	<=0.03	<=4	<=0.015	<=2	<=1	<=0.5	<=0.25	<=8	<=8	4	<=0.25	8	1	0.06	0.12	<=0.03	8	<=0.12	<=0.015	8	8	NA	blaTEM-52	NA	NA	NA
16-AB01767	2016	BfR	Germany	Germany	Livestock	Turkeys	Faeces/manure	NA	0	NA	NA	Microdilution	NA	>64	8	2	<=0.03	>128	0.25	<=2	<=1	1	<=0.25	>1024	<=8	8	<=0.25	8	4	0.06	0.25	<=0.03	8	0.25	<=0.015	16	2	blaCTX-M-1	NA	NA	NA	NA
16-AB01770	2016	BfR	Germany	Germany	Livestock	Broiler_chickens	Faeces/manure	NA	0	NA	NA	Microdilution	NA	>64	8	1	<=0.03	<=4	<=0.015	>64	<=1	1	<=0.25	>1024	<=8	8	<=0.25	8	64	0.06	0.25	0.06	4	0.5	<=0.015	64	1	blaCTX-M-1	NA	NA	NA	NA
16-AB01772	2016	BfR	Germany	Germany	Livestock	Turkeys	Faeces/manure	NA	0	NA	NA	Microdilution	NA	>64	8	16	<=0.03	>128	0.5	>64	<=1	2	>32	>1024	64	16	<=0.25	4	4	0.06	0.25	0.06	16	0.5	0.03	16	16	NA	blaTEM-20, blaTEM-106	NA	NA	NA
16-AB01777	2016	BfR	Germany	Germany	Livestock	Turkeys	Faeces/manure	NA	0	NA	NA	Microdilution	NA	>64	8	8	<=0.03	>128	0.25	<=2	<=1	<=0.5	<=0.25	<=8	<=8	4	<=0.25	4	1	0.06	0.12	<=0.03	8	<=0.12	<=0.015	4	8	NA	blaTEM-52	NA	NA	NA
16-AB01779	2016	BfR	Germany	Germany	Livestock	Turkeys	Faeces/manure	NA	0	NA	NA	Microdilution	NA	>64	2	2	<=0.03	>128	>8	<=2	<=1	>32	>32	>1024	>128	8	<=0.25	8	0.25	0.06	0.25	<=0.03	16	0.5	<=0.015	2	2	NA	blaTEM-52, blaTEM-106	NA	NA	NA
16-AB01781	2016	BfR	Germany	Germany	Livestock	Turkeys	Faeces/manure	NA	0	NA	NA	Microdilution	NA	>64	4	2	<=0.03	>128	8	<=2	<=1	1	<=0.25	<=8	>128	8	<=0.25	8	0.5	0.06	0.25	<=0.03	8	0.25	<=0.015	2	4	NA	blaTEM-52	NA	NA	NA
16-AB01786	2016	BfR	Germany	Germany	Livestock	Broiler_chickens	Faeces/manure	NA	0	NA	NA	Microdilution	NA	>64	8	2	<=0.03	<=4	<=0.015	<=2	<=1	<=0.5	<=0.25	>1024	<=8	4	<=0.25	8	8	0.06	0.25	<=0.03	8	0.25	<=0.015	32	1	blaCTX-M-1	NA	NA	NA	NA
16-AB01790	2016	BfR	Germany	Germany	Livestock	Broiler_chickens	Faeces/manure	NA	0	NA	NA	Microdilution	NA	>64	8	16	<=0.03	<=4	<=0.015	64	<=1	32	<=0.25	>1024	<=8	8	<=0.25	128	0.5	16	8	<=0.03	8	0.25	0.06	16	16	NA	NA	NA	blaCMY-2	NA
16-AB01794	2016	BfR	Germany	Germany	Livestock	Turkeys	Faeces/manure	NA	0	NA	NA	Microdilution	NA	>64	8	16	<=0.03	<=4	<=0.015	64	<=1	32	<=0.25	>1024	<=8	8	0.5	64	0.5	16	16	<=0.03	8	0.25	0.06	16	16	NA	NA	NA	blaCMY-2	NA
16-AB01796	2016	BfR	Germany	Germany	Livestock	Turkeys	Faeces/manure	NA	0	NA	NA	Microdilution	NA	>64	8	4	<=0.03	>128	0.5	<=2	<=1	<=0.5	<=0.25	<=8	16	16	<=0.25	8	2	0.06	0.25	<=0.03	8	0.25	0.03	8	4	NA	NA	blaSHV-2	NA	NA
16-AB01802	2016	BfR	Germany	Germany	Livestock	Broiler_chickens	Faeces/manure	NA	0	NA	NA	Microdilution	NA	>64	8	0.5	<=0.03	>128	0.25	<=2	<=1	<=0.5	<=0.25	<=8	<=8	4	<=0.25	4	8	0.06	0.12	<=0.03	4	<=0.12	<=0.015	32	0.5	blaCTX-M-1	NA	NA	NA	NA
16-AB01804	2016	BfR	Germany	Germany	Livestock	Broiler_chickens	Faeces/manure	NA	0	NA	NA	Microdilution	NA	>64	8	1	<=0.03	>128	0.25	<=2	<=1	<=0.5	<=0.25	<=8	<=8	4	<=0.25	4	4	0.06	0.12	<=0.03	4	0.25	<=0.015	32	0.5	blaCTX-M-1	NA	NA	NA	NA
16-AB01806	2016	BfR	Germany	Germany	Livestock	Turkeys	Faeces/manure	NA	0	NA	NA	Microdilution	NA	>64	8	16	<=0.03	<=4	0.03	>64	<=1	>32	<=0.25	>1024	<=8	4	0.5	128	0.5	16	16	0.06	16	0.5	0.25	32	16	NA	NA	NA	blaCMY-2	NA
16-AB01812	2016	BfR	Germany	Germany	Livestock	Broiler_chickens	Other	Sample taken from the caecum	0	NA	NA	Microdilution	NA	>64	8	16	<=0.03	<=4	0.03	<=2	<=1	<=0.5	>32	>1024	<=8	4	<=0.25	128	0.25	16	8	0.12	8	0.25	0.12	16	16	NA	NA	NA	blaCMY-2	NA
16-AB01815	2016	BfR	Germany	Germany	Livestock	Broiler_chickens	Other	Sample taken from the caecum	0	NA	NA	Microdilution	NA	>64	8	16	0.06	>128	0.5	>64	<=1	32	<=0.25	>1024	<=8	4	0.5	128	0.5	16	16	0.06	32	0.5	0.25	16	32	NA	NA	NA	blaCMY-2	NA
16-AB01828	2016	BfR	Germany	Germany	Livestock	Broiler_chickens	Meat	NA	0	NA	NA	Microdilution	NA	>64	8	2	<=0.03	>128	>8	>64	<=1	<=0.5	>32	>1024	<=8	8	0.5	4	16	0.06	0.12	<=0.03	4	0.25	0.03	64	2	blaCTX-M-1, blaCTX-M-2	NA	NA	NA	NA
16-AB01829	2016	BfR	Germany	Germany	Livestock	Turkeys	Meat	NA	0	NA	NA	Microdilution	NA	>64	8	16	<=0.03	128	2	<=2	<=1	2	<=0.25	<=8	<=8	4	<=0.25	16	64	0.25	0.5	<=0.03	16	<=0.12	0.06	128	8	blaCTX-M-1	NA	NA	NA	NA
16-AB01830	2016	BfR	Germany	Germany	Livestock	Broiler_chickens	Meat	NA	0	NA	NA	Microdilution	NA	>64	4	8	<=0.03	128	0.12	<=2	<=1	1	<=0.25	16	<=8	4	<=0.25	64	0.12	4	4	<=0.03	4	<=0.12	0.03	4	8	NA	NA	NA	blaCMY-2	NA
16-AB01831	2016	BfR	Germany	Germany	Livestock	Broiler_chickens	Meat	NA	0	NA	NA	Microdilution	NA	>64	8	4	<=0.03	<=4	0.03	>64	<=1	<=0.5	>32	>1024	<=8	8	0.5	8	32	0.06	0.5	<=0.03	16	0.25	0.03	64	2	blaCTX-M-15	NA	NA	NA	NA
16-AB01832	2016	BfR	Germany	Germany	Livestock	Broiler_chickens	Meat	NA	0	NA	NA	Microdilution	NA	>64	8	1	<=0.03	128	0.25	64	<=1	<=0.5	>32	>1024	<=8	16	<=0.25	4	4	0.06	0.12	<=0.03	4	<=0.12	<=0.015	8	1	blaCTX-M-1	NA	NA	NA	NA
16-AB01833	2016	BfR	Germany	Germany	Livestock	Broiler_chickens	Meat	NA	0	NA	NA	Microdilution	NA	>64	8	2	<=0.03	>128	0.5	>64	<=1	<=0.5	>32	>1024	16	64	<=0.25	16	32	0.12	0.25	<=0.03	16	0.25	<=0.015	64	2	blaCTX-M-1	NA	NA	NA	NA
16-AB01837	2016	BfR	Germany	Germany	Livestock	Broiler_chickens	Meat	NA	0	NA	NA	Microdilution	NA	>64	8	2	<=0.03	>128	>8	>64	<=1	<=0.5	>32	>1024	<=8	8	<=0.25	8	8	0.06	0.25	<=0.03	8	0.25	0.03	32	2	blaCTX-M-1	NA	NA	NA	NA
16-AB01838	2016	BfR	Germany	Germany	Livestock	Broiler_chickens	Other	Sample taken from the caecum	0	NA	NA	Microdilution	NA	64	8	4	<=0.03	>128	8	16	<=1	<=0.5	<=0.25	>1024	>128	4	<=0.25	64	0.06	4	2	<=0.03	4	<=0.12	0.03	8	2	NA	NA	NA	blaCMY-2	NA
16-AB01839	2016	BfR	Germany	Germany	Livestock	Turkeys	Other	Sample taken from the caecum	0	NA	NA	Microdilution	NA	>64	8	2	<=0.03	<=4	0.03	<=2	<=1	2	<=0.25	<=8	<=8	8	<=0.25	8	8	0.06	0.25	<=0.03	16	0.5	<=0.015	32	4	blaCTX-M-1	NA	NA	NA	NA
16-AB01840	2016	BfR	Germany	Germany	Livestock	Turkeys	Faeces/manure	NA	0	NA	NA	Microdilution	NA	>64	1	1	<=0.03	<=4	0.03	64	<=1	<=0.5	>32	>1024	<=8	4	<=0.25	4	0.25	0.06	0.12	<=0.03	8	<=0.12	<=0.015	1	2	NA	blaTEM-52	NA	NA	NA
16-AB01841	2016	BfR	Germany	Germany	Livestock	Broiler_chickens	Other	Sample taken from the caecum	0	NA	NA	Microdilution	NA	>64	1	1	<=0.03	>128	0.5	<=2	<=1	<=0.5	>32	>1024	<=8	16	<=0.25	4	0.12	0.06	0.12	<=0.03	8	0.25	<=0.015	1	2	NA	NA	NA	blaCMY-2	NA
16-AB01842	2016	BfR	Germany	Germany	Livestock	Broiler_chickens	Meat	NA	0	NA	NA	Microdilution	NA	64	4	4	<=0.03	128	0.5	<=2	<=1	2	<=0.25	<=8	<=8	8	<=0.25	32	0.06	1	1	<=0.03	4	<=0.12	<=0.015	8	2	NA	NA	NA	blaCMY-2	NA
16-AB01843	2016	BfR	Germany	Germany	Livestock	Turkeys	Meat	NA	0	NA	NA	Microdilution	NA	>64	8	1	<=0.03	<=4	<=0.015	64	<=1	<=0.5	>32	>1024	<=8	8	<=0.25	8	16	0.06	0.12	<=0.03	4	0.25	0.03	32	1	blaCTX-M-1	NA	NA	NA	NA
16-AB01859	2016	BfR	Germany	Germany	Livestock	Turkeys	Meat	NA	0	NA	NA	Microdilution	NA	>64	8	8	<=0.03	>128	>8	<=2	<=1	<=0.5	<=0.25	<=8	<=8	8	<=0.25	8	8	0.12	0.25	<=0.03	8	<=0.12	<=0.015	32	4	blaCTX-M-1	NA	NA	NA	NA
16-AB01861	2016	BfR	Germany	Germany	Livestock	Broiler_chickens	Meat	NA	0	NA	NA	Microdilution	NA	>64	8	2	<=0.03	128	0.25	64	<=1	1	<=0.25	>1024	<=8	8	<=0.25	4	8	0.06	0.12	<=0.03	4	0.25	<=0.015	32	1	blaCTX-M-15	NA	NA	NA	NA
16-AB01863	2016	BfR	Germany	Germany	Livestock	Broiler_chickens	Meat	NA	0	NA	NA	Microdilution	NA	>64	8	8	<=0.03	>128	>8	>64	<=1	<=0.5	0.5	>1024	<=8	16	0.5	16	16	0.12	0.25	<=0.03	16	<=0.12	<=0.015	64	8	blaCTX-M-1	NA	NA	NA	NA
16-AB01864	2016	BfR	Germany	Germany	Livestock	Turkeys	Meat	NA	0	NA	NA	Microdilution	NA	>64	8	1	<=0.03	<=4	<=0.015	>64	<=1	<=0.5	<=0.25	>1024	32	<=2	<=0.25	4	8	0.06	0.12	<=0.03	4	<=0.12	<=0.015	16	1	blaCTX-M-15	NA	NA	NA	NA
16-AB01892	2016	BfR	Germany	Germany	Livestock	Broiler_chickens	Meat	NA	0	NA	NA	Microdilution	NA	>64	8	4	<=0.03	<=4	0.5	64	<=1	<=0.5	<=0.25	>1024	<=8	4	<=0.25	4	16	0.06	0.12	<=0.03	8	<=0.12	<=0.015	64	8	blaCTX-M-1	NA	NA	NA	NA
16-AB01894	2016	BfR	Germany	Germany	Livestock	Broiler_chickens	Other	Sample taken from the caecum	0	NA	NA	Microdilution	NA	>64	4	8	<=0.03	>128	4	<=2	<=1	1	>32	>1024	<=8	16	<=0.25	4	0.25	0.06	0.12	<=0.03	4	<=0.12	<=0.015	2	16	NA	NA	blaSHV-12	NA	NA
16-AB01958	2016	BfR	Germany	Germany	Livestock	Turkeys	Other	Sample taken from the caecum	0	NA	NA	Microdilution	NA	>64	8	1	<=0.03	16	0.25	<=2	<=1	1	<=0.25	<=8	<=8	4	<=0.25	4	8	0.06	0.12	<=0.03	4	<=0.12	<=0.015	16	1	blaCTX-M-15	NA	NA	NA	NA
16-AB01959	2016	BfR	Germany	Germany	Livestock	Turkeys	Other	Sample taken from the caecum	0	NA	NA	Microdilution	NA	>64	8	1	<=0.03	>128	>8	>64	<=1	1	<=0.25	<=8	128	8	0.5	8	8	0.06	0.12	<=0.03	8	0.25	<=0.015	32	1	blaCTX-M-1	NA	NA	NA	NA
16-AB01960	2016	BfR	Germany	Germany	Livestock	Broiler_chickens	Other	Sample taken from the caecum	0	NA	NA	Microdilution	NA	>64	8	8	<=0.03	>128	>8	8	<=1	32	>32	>1024	64	16	<=0.25	8	8	0.06	0.25	<=0.03	8	0.25	<=0.015	64	4	blaCTX-M-1	NA	NA	NA	NA
16-AB01961	2016	BfR	Germany	Germany	Livestock	Broiler_chickens	Other	Sample taken from the caecum	0	NA	NA	Microdilution	NA	>64	8	8	<=0.03	>128	>8	<=2	<=1	<=0.5	<=0.25	<=8	<=8	8	<=0.25	4	4	0.12	0.25	<=0.03	8	<=0.12	<=0.015	64	4	blaCTX-M-15	NA	NA	NA	NA
16-AB01962	2016	BfR	Germany	Germany	Livestock	Turkeys	Other	Sample taken from the caecum	0	NA	NA	Microdilution	NA	>64	8	1	<=0.03	>128	8	<=2	<=1	1	<=0.25	<=8	<=8	4	<=0.25	8	16	0.06	0.25	<=0.03	4	0.25	<=0.015	32	1	blaCTX-M-1	NA	NA	NA	NA
16-AB01963	2016	BfR	Germany	Germany	Livestock	Turkeys	Other	Sample taken from the caecum	0	NA	NA	Microdilution	NA	>64	8	1	<=0.03	>128	8	>64	<=1	<=0.5	0.5	>1024	<=8	4	0.5	4	8	0.12	0.25	<=0.03	4	0.25	<=0.015	32	1	blaCTX-M-1	NA	NA	NA	NA
16-AB01964	2016	BfR	Germany	Germany	Livestock	Turkeys	Other	Sample taken from the caecum	0	NA	NA	Microdilution	NA	>64	8	1	<=0.03	>128	0.25	<=2	<=1	32	<=0.25	<=8	16	4	<=0.25	8	16	0.06	0.12	<=0.03	4	<=0.12	<=0.015	32	1	blaCTX-M-1	NA	NA	NA	NA
16-AB01965	2016	BfR	Germany	Germany	Livestock	Broiler_chickens	Other	Sample taken from the caecum	0	NA	NA	Microdilution	NA	>64	8	8	<=0.03	>128	0.5	<=2	<=1	1	<=0.25	<=8	16	8	<=0.25	8	2	0.06	0.12	<=0.03	8	0.25	<=0.015	8	8	NA	blaTEM-52	NA	NA	NA
16-AB01966	2016	BfR	Germany	Germany	Livestock	Broiler_chickens	Other	Sample taken from the caecum	0	NA	NA	Microdilution	NA	>64	4	16	<=0.03	128	0.25	>64	<=1	<=0.5	<=0.25	>1024	<=8	4	<=0.25	32	0.12	8	4	<=0.03	4	0.25	<=0.015	8	8	NA	NA	NA	blaCMY-2	NA
16-AB01967	2016	BfR	Germany	Germany	Livestock	Broiler_chickens	Other	Sample taken from the caecum	0	NA	NA	Microdilution	NA	>64	8	8	<=0.03	<=4	<=0.015	>64	<=1	32	<=0.25	>1024	<=8	4	0.5	64	0.25	8	8	<=0.03	8	0.25	0.03	8	8	NA	NA	NA	blaCMY-2	NA
16-AB01968	2016	BfR	Germany	Germany	Livestock	Broiler_chickens	Other	Sample taken from the caecum	0	NA	NA	Microdilution	NA	>64	8	8	<=0.03	>128	0.25	>64	<=1	32	<=0.25	>1024	<=8	4	<=0.25	128	0.25	16	4	<=0.03	8	0.25	0.03	16	8	NA	NA	NA	blaCMY-2	NA
16-AB01969	2016	BfR	Germany	Germany	Livestock	Broiler_chickens	Other	Sample taken from the caecum	0	NA	NA	Microdilution	NA	>64	4	2	<=0.03	<=4	0.03	<=2	<=1	<=0.5	>32	>1024	<=8	8	<=0.25	8	0.25	0.06	0.12	<=0.03	8	0.25	<=0.015	2	8	NA	blaTEM-52	NA	NA	NA
16-AB01970	2016	BfR	Germany	Germany	Livestock	Broiler_chickens	Other	Sample taken from the caecum	0	NA	NA	Microdilution	NA	>64	8	8	<=0.03	<=4	<=0.015	>64	<=1	16	<=0.25	>1024	<=8	4	<=0.25	64	0.25	8	8	<=0.03	8	0.25	0.03	8	8	NA	NA	NA	blaCMY-2	NA
16-AB01971	2016	BfR	Germany	Germany	Livestock	Turkeys	Other	Sample taken from the caecum	0	NA	NA	Microdilution	NA	>64	8	16	<=0.03	>128	>8	64	<=1	32	>32	>1024	<=8	64	<=0.25	8	32	0.12	0.25	<=0.03	8	0.25	0.06	128	16	blaCTX-M-15	NA	NA	NA	NA
16-AB01972	2016	BfR	Germany	Germany	Livestock	Turkeys	Other	Sample taken from the caecum	0	NA	NA	Microdilution	NA	>64	8	4	<=0.03	8	0.5	<=2	<=1	<=0.5	0.5	>1024	32	8	<=0.25	8	2	0.06	0.12	<=0.03	8	0.25	<=0.015	8	8	NA	blaTEM-52	NA	NA	NA
16-AB01973	2016	BfR	Germany	Germany	Livestock	Turkeys	Other	Sample taken from the caecum	0	NA	NA	Microdilution	NA	>64	8	1	<=0.03	>128	8	<=2	<=1	<=0.5	<=0.25	<=8	<=8	8	<=0.25	4	4	0.06	0.12	<=0.03	4	0.25	<=0.015	16	1	blaCTX-M-1	NA	NA	NA	NA
16-AB01974	2016	BfR	Germany	Germany	Livestock	Turkeys	Other	Sample taken from the caecum	0	NA	NA	Microdilution	NA	>64	8	4	<=0.03	>128	>8	>64	4	<=0.5	0.5	<=8	<=8	8	0.5	16	8	0.12	0.12	<=0.03	4	<=0.12	<=0.015	32	4	blaCTX-M-15	NA	NA	NA	NA
16-AB01975	2016	BfR	Germany	Germany	Livestock	Broiler_chickens	Other	Sample taken from the caecum	0	NA	NA	Microdilution	NA	>64	8	8	<=0.03	8	0.5	<=2	<=1	<=0.5	0.5	>1024	32	8	<=0.25	8	2	0.06	0.25	<=0.03	8	0.25	0.03	8	8	NA	blaTEM-52	NA	NA	NA
16-AB01976	2016	BfR	Germany	Germany	Livestock	Broiler_chickens	Other	Sample taken from the caecum	0	NA	NA	Microdilution	NA	>64	8	16	<=0.03	>128	0.25	>64	<=1	<=0.5	>32	>1024	64	16	<=0.25	128	0.5	16	16	<=0.03	32	0.5	0.12	32	16	NA	NA	NA	blaCMY-2	NA
16-AB01977	2016	BfR	Germany	Germany	Livestock	Broiler_chickens	Other	Sample taken from the caecum	0	NA	NA	Microdilution	NA	>64	8	8	<=0.03	>128	0.5	>64	<=1	>32	0.5	>1024	<=8	4	<=0.25	128	0.25	8	8	<=0.03	8	0.25	0.06	8	8	NA	NA	NA	blaCMY-2	NA
16-AB01981	2016	BfR	Germany	Germany	Livestock	Broiler_chickens	Other	Sample taken from the caecum	0	NA	NA	Microdilution	NA	>64	4	16	<=0.03	8	0.5	<=2	<=1	<=0.5	<=0.25	16	<=8	4	<=0.25	8	0.5	0.06	0.25	<=0.03	8	<=0.12	<=0.015	8	16	NA	NA	blaSHV-12	NA	NA
16-AB01982	2016	BfR	Germany	Germany	Livestock	Turkeys	Meat	NA	0	NA	NA	Microdilution	NA	>64	8	2	<=0.03	128	0.25	>64	<=1	32	<=0.25	>1024	<=8	8	<=0.25	4	32	0.06	0.25	<=0.03	4	<=0.12	<=0.015	64	1	blaCTX-M-15	NA	NA	NA	NA
16-AB01990	2016	BfR	Germany	Germany	Livestock	Turkeys	Faeces/manure	NA	0	NA	NA	Microdilution	NA	>64	8	16	<=0.03	<=4	0.03	>64	<=1	>32	>32	>1024	<=8	4	<=0.25	128	0.25	16	8	<=0.03	8	0.25	0.03	16	8	NA	NA	NA	blaCMY-2	NA
16-AB01991	2016	BfR	Germany	Germany	Livestock	Turkeys	Faeces/manure	NA	0	NA	NA	Microdilution	NA	>64	1	1	<=0.03	<=4	0.03	>64	<=1	<=0.5	>32	>1024	<=8	8	0.5	8	0.25	0.06	0.12	<=0.03	8	0.25	<=0.015	1	1	NA	blaTEM-52	NA	NA	NA
16-AB02016	2016	BfR	Germany	Germany	Livestock	Broiler_chickens	Meat	NA	0	NA	NA	Microdilution	NA	>64	8	8	<=0.03	<=4	<=0.015	<=2	4	<=0.5	>32	>1024	32	8	<=0.25	8	2	0.06	0.12	<=0.03	4	<=0.12	<=0.015	8	8	NA	blaTEM-52	NA	NA	NA
16-AB02017	2016	BfR	Germany	Germany	Livestock	Turkeys	Meat	NA	0	NA	NA	Microdilution	NA	>64	8	8	<=0.03	>128	>8	<=2	<=1	<=0.5	<=0.25	<=8	<=8	4	<=0.25	8	8	0.12	0.12	<=0.03	8	<=0.12	<=0.015	32	4	blaCTX-M-1	NA	NA	NA	NA
16-AB02018	2016	BfR	Germany	Germany	Livestock	Turkeys	Meat	NA	0	NA	NA	Microdilution	NA	>64	8	8	<=0.03	>128	>8	<=2	<=1	<=0.5	<=0.25	<=8	<=8	8	<=0.25	8	4	0.12	0.12	<=0.03	8	<=0.12	<=0.015	32	4	blaCTX-M-15	NA	NA	NA	NA
16-AB02019	2016	BfR	Germany	Germany	Livestock	Broiler_chickens	Meat	NA	0	NA	NA	Microdilution	NA	>64	8	16	<=0.03	128	0.5	<=2	<=1	<=0.5	<=0.25	16	<=8	4	0.5	64	0.25	8	8	<=0.03	8	0.25	0.06	8	16	NA	NA	NA	blaCMY-2	NA
16-AB02020	2016	BfR	Germany	Germany	Livestock	Turkeys	Meat	NA	0	NA	NA	Microdilution	NA	>64	8	4	<=0.03	8	0.25	<=2	<=1	<=0.5	<=0.25	>1024	32	4	<=0.25	4	1	0.06	0.12	<=0.03	8	<=0.12	<=0.015	4	8	NA	blaTEM-52	NA	NA	NA
16-AB02021	2016	BfR	Germany	Germany	Livestock	Turkeys	Meat	NA	0	NA	NA	Microdilution	NA	>64	8	16	<=0.03	>128	>8	<=2	<=1	<=0.5	<=0.25	<=8	<=8	8	<=0.25	16	2	0.12	0.25	<=0.03	8	<=0.12	<=0.015	8	64	NA	NA	blaSHV-12	NA	NA
16-AB02022	2016	BfR	Germany	Germany	Livestock	Broiler_chickens	Meat	NA	0	NA	NA	Microdilution	NA	>64	8	16	<=0.03	128	0.5	<=2	<=1	<=0.5	<=0.25	16	<=8	4	<=0.25	128	0.25	8	8	<=0.03	8	0.25	0.06	32	16	NA	NA	NA	blaCMY-2	NA
16-AB02026	2016	BfR	Germany	Germany	Livestock	Turkeys	Other	Sample taken from the caecum	0	NA	NA	Microdilution	NA	>64	4	16	<=0.03	8	0.5	4	<=1	<=0.5	<=0.25	<=8	<=8	8	<=0.25	8	0.5	0.06	0.12	<=0.03	8	<=0.12	<=0.015	4	16	NA	NA	blaSHV-12	NA	NA
16-AB02029	2016	BfR	Germany	Germany	Livestock	Turkeys	Faeces/manure	NA	0	NA	NA	Microdilution	NA	>64	2	16	<=0.03	16	0.5	<=2	<=1	<=0.5	<=0.25	<=8	<=8	8	<=0.25	4	0.25	0.06	0.12	<=0.03	4	<=0.12	<=0.015	4	16	NA	NA	blaSHV-12	NA	NA
16-AB02033	2016	BfR	Germany	Germany	Livestock	Turkeys	Meat	NA	0	NA	NA	Microdilution	NA	>64	8	1	<=0.03	>128	8	<=2	<=1	<=0.5	<=0.25	<=8	<=8	4	<=0.25	4	8	0.06	0.12	<=0.03	4	0.25	<=0.015	32	1	blaCTX-M-15	NA	NA	NA	NA
16-AB02034	2016	BfR	Germany	Germany	Livestock	Turkeys	Meat	NA	0	NA	NA	Microdilution	NA	>64	8	1	<=0.03	<=4	<=0.015	<=2	<=1	<=0.5	<=0.25	<=8	<=8	4	<=0.25	4	32	0.06	0.12	<=0.03	4	0.25	<=0.015	64	1	blaCTX-M-1	NA	NA	NA	NA
16-AB02035	2016	BfR	Germany	Germany	Livestock	Broiler_chickens	Meat	NA	0	NA	NA	Microdilution	NA	>64	8	1	<=0.03	<=4	<=0.015	<=2	<=1	2	>32	>1024	<=8	<=2	<=0.25	2	4	0.06	0.12	<=0.03	4	<=0.12	<=0.015	16	2	blaCTX-M-1	NA	NA	NA	NA
16-AB02036	2016	BfR	Germany	Germany	Livestock	Turkeys	Meat	NA	0	NA	NA	Microdilution	NA	>64	8	1	<=0.03	<=4	0.03	<=2	<=1	<=0.5	<=0.25	<=8	<=8	4	<=0.25	16	32	0.06	0.12	<=0.03	4	<=0.12	0.06	64	1	blaCTX-M-1	NA	NA	NA	NA
16-AB02051	2016	BfR	Germany	Germany	Livestock	Turkeys	Meat	NA	0	NA	NA	Microdilution	NA	>64	8	4	<=0.03	>128	>8	>64	4	<=0.5	>32	>1024	>128	8	<=0.25	8	16	0.06	0.25	<=0.03	4	0.25	<=0.015	64	4	blaCTX-M-1	NA	NA	NA	NA
16-AB02052	2016	BfR	Germany	Germany	Livestock	Turkeys	Meat	NA	0	NA	NA	Microdilution	NA	>64	8	8	<=0.03	>128	>8	>64	<=1	<=0.5	<=0.25	<=8	<=8	8	<=0.25	16	32	0.12	0.25	<=0.03	16	0.5	<=0.015	128	8	blaCTX-M-15	NA	NA	NA	NA
16-AB02053	2016	BfR	Germany	Germany	Livestock	Turkeys	Meat	NA	0	NA	NA	Microdilution	NA	>64	8	16	<=0.03	>128	>8	>64	<=1	<=0.5	<=0.25	<=8	<=8	8	<=0.25	16	64	0.12	0.25	INVALID	16	0.25	0.03	128	16	blaCTX-M-15	NA	NA	NA	NA
16-AB02054	2016	BfR	Germany	Germany	Livestock	Turkeys	Meat	NA	0	NA	NA	Microdilution	NA	>64	8	0.5	<=0.03	<=4	<=0.015	<=2	<=1	1	<=0.25	>1024	<=8	4	<=0.25	4	16	0.06	0.12	<=0.03	4	<=0.12	<=0.015	16	1	blaCTX-M-1	NA	NA	NA	NA
16-AB02056	2016	BfR	Germany	Germany	Livestock	Turkeys	Meat	NA	0	NA	NA	Microdilution	NA	>64	8	1	<=0.03	>128	0.5	>64	<=1	<=0.5	<=0.25	>1024	>128	8	0.5	8	8	0.06	0.25	<=0.03	16	<=0.12	<=0.015	32	1	blaCTX-M-1	NA	NA	NA	NA
16-AB02057	2016	BfR	Germany	Germany	Livestock	Turkeys	Meat	NA	0	NA	NA	Microdilution	NA	>64	8	0.5	<=0.03	128	0.25	<=2	<=1	16	<=0.25	<=8	<=8	8	<=0.25	4	4	0.06	0.12	<=0.03	4	<=0.12	<=0.015	16	0.5	blaCTX-M-1	NA	NA	NA	NA
16-AB02065	2016	BfR	Germany	Germany	Livestock	Broiler_chickens	Faeces/manure	NA	0	NA	NA	Microdilution	NA	>64	8	8	<=0.03	>128	8	>64	<=1	<=0.5	>32	16	<=8	8	<=0.25	128	0.5	8	4	<=0.03	8	0.25	0.25	16	8	NA	NA	NA	blaCMY-2	NA
16-AB02066	2016	BfR	Germany	Germany	Livestock	Cattle	Other	NA	0	NA	NA	Microdilution	NA	>64	8	4	<=0.03	<=4	<=0.015	<=2	<=1	<=0.5	<=0.25	>1024	32	8	<=0.25	8	1	0.06	0.12	<=0.03	4	0.25	<=0.015	4	4	NA	blaTEM-52	NA	NA	NA
16-AB02067	2016	BfR	Germany	Germany	Livestock	Cattle	Other	NA	0	NA	NA	Microdilution	NA	>64	8	8	<=0.03	>128	>8	4	<=1	16	>32	>1024	>128	4	<=0.25	4	16	0.06	0.12	<=0.03	8	<=0.12	<=0.015	32	4	blaCTX-M-15	NA	NA	NA	NA
16-AB02068	2016	BfR	Germany	Germany	Wild_animals	Deer	Other	NA	0	NA	NA	Microdilution	NA	>64	8	4	<=0.03	>128	8	>64	<=1	<=0.5	<=0.25	>1024	128	8	<=0.25	4	16	0.06	0.12	<=0.03	4	0.25	<=0.015	64	4	blaCTX-M-15	NA	NA	NA	NA
16-AB02069	2016	BfR	Germany	Germany	Livestock	Pigs	Other	NA	0	NA	NA	Microdilution	NA	>64	8	4	<=0.03	>128	>8	64	4	<=0.5	>32	>1024	<=8	8	<=0.25	4	4	0.06	0.12	<=0.03	4	<=0.12	<=0.015	32	2	blaCTX-M-15	NA	NA	NA	NA
16-AB02070	2016	BfR	Germany	Germany	Livestock	Pigs	Other	NA	0	NA	NA	Microdilution	NA	>64	8	4	<=0.03	>128	>8	64	4	<=0.5	>32	>1024	<=8	8	<=0.25	4	4	0.06	0.12	<=0.03	4	<=0.12	<=0.015	32	2	blaCTX-M-1	NA	NA	NA	NA
16-AB02071	2016	BfR	Germany	Germany	Livestock	Pigs	Other	NA	0	NA	NA	Microdilution	NA	>64	8	1	<=0.03	16	0.5	<=2	<=1	<=0.5	<=0.25	<=8	<=8	4	<=0.25	4	4	0.06	0.12	<=0.03	4	<=0.12	<=0.015	32	1	blaCTX-M-1	NA	NA	NA	NA
16-AB02072	2016	BfR	Germany	Germany	Livestock	Pigs	Other	NA	0	NA	NA	Microdilution	NA	>64	8	1	<=0.03	<=4	<=0.015	<=2	<=1	<=0.5	>32	>1024	<=8	4	<=0.25	4	32	0.06	0.12	<=0.03	4	0.25	<=0.015	32	1	blaCTX-M-1	NA	NA	NA	NA
16-AB02077	2016	BfR	Germany	Germany	Livestock	Cattle	Faeces/manure	NA	0	NA	NA	Microdilution	NA	>64	8	16	<=0.03	32	1	<=2	<=1	1	<=0.25	16	<=8	8	<=0.25	8	1	0.06	0.12	<=0.03	8	0.25	<=0.015	8	16	NA	NA	blaSHV-12	NA	NA
16-AB02091	2016	BfR	Germany	Germany	Livestock	Cattle	Other	NA	0	NA	NA	Microdilution	NA	>64	8	8	<=0.03	>128	0.5	<=2	<=1	<=0.5	>32	>1024	<=8	4	<=0.25	64	0.25	8	4	<=0.03	8	0.25	0.03	8	8	NA	NA	NA	blaCMY-2	NA
16-AB02116	2016	BfR	Germany	Germany	Livestock	Pigs	Other	NA	0	NA	NA	Microdilution	NA	>64	8	2	<=0.03	>128	4	<=2	<=1	2	<=0.25	<=8	<=8	4	<=0.25	4	16	0.06	0.12	<=0.03	4	0.25	<=0.015	64	1	blaCTX-M-15	NA	NA	NA	NA
16-AB02128	2016	BfR	Germany	Germany	Livestock	Broiler_chickens	Meat	NA	0	NA	NA	Microdilution	NA	>64	8	8	<=0.03	>128	>8	<=2	<=1	<=0.5	>32	>1024	>128	8	<=0.25	128	0.5	8	4	<=0.03	8	0.25	0.12	16	8	NA	NA	NA	blaCMY-2	NA
16-AB02129	2016	BfR	Germany	Germany	Livestock	Broiler_chickens	Meat	NA	0	NA	NA	Microdilution	NA	>64	8	8	<=0.03	<=4	<=0.015	>64	<=1	32	<=0.25	>1024	<=8	8	<=0.25	32	0.25	8	8	<=0.03	4	0.25	0.03	8	8	NA	NA	NA	blaCMY-2	NA
16-AB02139	2016	BfR	Germany	Germany	Livestock	Broiler_chickens	Meat	NA	0	NA	NA	Microdilution	NA	>64	4	16	<=0.03	<=4	0.5	64	<=1	1	>32	>1024	<=8	16	<=0.25	8	0.5	0.06	0.12	<=0.03	8	<=0.12	<=0.015	4	16	NA	NA	blaSHV-12	NA	NA
16-AB02140	2016	BfR	Germany	Germany	Livestock	Broiler_chickens	Meat	NA	0	NA	NA	Microdilution	NA	>64	4	16	<=0.03	8	0.5	64	<=1	1	>32	>1024	<=8	4	<=0.25	4	0.5	0.06	0.12	<=0.03	8	0.25	<=0.015	4	16	NA	NA	blaSHV-12	NA	NA
16-AB02141	2016	BfR	Germany	Germany	Livestock	Broiler_chickens	Meat	NA	0	NA	NA	Microdilution	NA	>64	8	16	<=0.03	64	0.25	<=2	<=1	<=0.5	<=0.25	<=8	<=8	<=2	0.5	128	0.5	8	8	<=0.03	8	0.25	0.06	16	16	NA	NA	NA	blaCMY-2	NA
16-AB02142	2016	BfR	Germany	Germany	Livestock	Broiler_chickens	Meat	NA	0	NA	NA	Microdilution	NA	>64	8	8	<=0.03	128	0.25	>64	<=1	32	<=0.25	>1024	<=8	16	<=0.25	64	0.25	8	4	<=0.03	4	0.25	0.03	8	8	NA	NA	NA	blaCMY-2	NA
16-AB02143	2016	BfR	Germany	Germany	Livestock	Broiler_chickens	Meat	NA	0	NA	NA	Microdilution	NA	>64	2	2	<=0.03	>128	0.5	>64	<=1	<=0.5	>32	>1024	<=8	8	<=0.25	16	0.5	0.06	0.25	<=0.03	16	0.25	<=0.015	4	2	NA	blaTEM-52	NA	NA	NA
16-AB02144	2016	BfR	Germany	Germany	Livestock	Broiler_chickens	Meat	NA	0	NA	NA	Microdilution	NA	>64	8	1	<=0.03	128	0.25	>64	<=1	<=0.5	<=0.25	>1024	<=8	8	<=0.25	8	4	0.06	0.12	<=0.03	8	<=0.12	<=0.015	16	2	blaCTX-M-1	NA	NA	NA	NA
16-AB02145	2016	BfR	Germany	Germany	Livestock	Broiler_chickens	Meat	NA	0	NA	NA	Microdilution	NA	>64	8	2	<=0.03	>128	0.25	>64	<=1	<=0.5	>32	>1024	128	4	<=0.25	8	4	0.06	0.25	<=0.03	8	<=0.12	<=0.015	32	2	blaCTX-M-1	NA	NA	NA	NA
16-AB02149	2016	BfR	Germany	Germany	Wild_animals	Deer	Faeces/manure	NA	0	NA	NA	Microdilution	NA	>64	8	8	<=0.03	<=4	0.03	<=2	<=1	<=0.5	<=0.25	<=8	<=8	32	0.5	64	0.25	8	8	<=0.03	4	0.25	0.03	8	8	NA	NA	NA	blaCMY-2	NA
16-AB02150	2016	BfR	Germany	Germany	Livestock	Cattle	Faeces/manure	NA	0	NA	NA	Microdilution	NA	2	8	1	<=0.03	>128	>8	>64	<=1	<=0.5	>32	>1024	>128	8	<=0.25	4	8	0.06	0.12	<=0.03	8	<=0.12	<=0.015	16	1	blaCTX-M-1	NA	NA	NA	NA
16-AB02156	2016	BfR	Germany	Germany	Livestock	Cattle	Faeces/manure	NA	0	NA	NA	Microdilution	NA	>64	8	16	<=0.03	>128	>8	<=2	<=1	<=0.5	>32	16	<=8	4	<=0.25	128	0.5	8	4	<=0.03	8	0.25	0.12	16	8	NA	NA	NA	blaCMY-2	NA
16-AB02158	2016	BfR	Germany	Germany	Wild_animals	Deer	Faeces/manure	NA	0	NA	NA	Microdilution	NA	>64	8	8	<=0.03	128	0.25	<=2	<=1	<=0.5	<=0.25	<=8	<=8	8	<=0.25	8	1	0.06	0.25	<=0.03	8	0.25	<=0.015	4	8	NA	blaTEM-52	NA	NA	NA
16-AB02166	2016	BfR	Germany	Germany	Livestock	Pigs	Faeces/manure	NA	0	NA	NA	Microdilution	NA	>64	8	8	<=0.03	<=4	<=0.015	64	<=1	<=0.5	<=0.25	<=8	<=8	8	<=0.25	4	1	0.06	0.12	<=0.03	8	<=0.12	<=0.015	4	8	NA	blaTEM-52	NA	NA	NA
16-AB02168	2016	BfR	Germany	Germany	Livestock	Cattle	Faeces/manure	NA	0	NA	NA	Microdilution	NA	>64	8	16	<=0.03	>128	0.5	<=2	<=1	1	<=0.25	16	<=8	4	<=0.25	128	0.5	8	8	0.06	16	0.25	0.06	8	16	NA	NA	NA	blaCMY-2	NA
16-AB02176	2016	BfR	Germany	Germany	Livestock	Pigs	Faeces/manure	NA	0	NA	NA	Microdilution	NA	>64	8	8	<=0.03	>128	8	<=2	4	1	>32	>1024	<=8	8	<=0.25	128	0.25	32	8	<=0.03	8	0.5	0.06	16	8	NA	NA	NA	blaCMY-2	NA
16-AB02179	2016	BfR	Germany	Germany	Livestock	Pigs	Faeces/manure	NA	0	NA	NA	Microdilution	NA	>64	8	8	<=0.03	<=4	0.03	<=2	<=1	<=0.5	<=0.25	<=8	<=8	8	<=0.25	4	64	0.06	0.12	<=0.03	32	0.25	0.03	128	16	blaCTX-M-15	NA	NA	NA	NA
16-AB02182	2016	BfR	Germany	Germany	Livestock	Cattle	Faeces/manure	NA	0	NA	NA	Microdilution	NA	>64	8	8	<=0.03	>128	0.5	>64	<=1	<=0.5	>32	>1024	>128	16	<=0.25	8	2	0.12	0.25	<=0.03	16	0.25	<=0.015	8	16	NA	blaTEM-52	NA	NA	NA
16-AB02183	2016	BfR	Germany	Germany	Livestock	Broiler_chickens	Meat	NA	0	NA	NA	Microdilution	NA	>64	8	16	<=0.03	>128	2	<=2	<=1	<=0.5	<=0.25	>1024	<=8	4	<=0.25	8	16	0.06	0.25	<=0.03	16	<=0.12	<=0.015	32	16	blaCTX-M-1	NA	blaSHV-12	NA	NA
16-AB02184	2016	BfR	Germany	Germany	Livestock	Broiler_chickens	Meat	NA	0	NA	NA	Microdilution	NA	>64	8	16	<=0.03	>128	0.5	<=2	<=1	<=0.5	<=0.25	<=8	<=8	4	<=0.25	128	0.25	8	4	<=0.03	8	0.25	0.06	8	8	NA	NA	NA	blaCMY-2	NA
16-AB02185	2016	BfR	Germany	Germany	Livestock	Broiler_chickens	Meat	NA	0	NA	NA	Microdilution	NA	>64	8	16	<=0.03	<=4	<=0.015	>64	<=1	32	>32	>1024	<=8	4	<=0.25	128	0.25	8	8	0.06	8	0.25	0.06	16	16	NA	NA	NA	blaCMY-2	NA
16-AB02205	2016	BfR	Germany	Germany	Livestock	Pigs	Other	NA	0	NA	NA	Microdilution	NA	>64	8	16	<=0.03	>128	0.25	<=2	<=1	<=0.5	<=0.25	<=8	<=8	8	<=0.25	64	0.25	8	8	<=0.03	8	0.25	0.03	8	8	NA	NA	NA	blaCMY-2	NA
16-AB02206	2016	BfR	Germany	Germany	Livestock	Cattle	Other	NA	0	NA	NA	Microdilution	NA	>64	8	16	<=0.03	<=4	<=0.015	>64	<=1	32	<=0.25	>1024	<=8	4	<=0.25	64	0.25	8	4	<=0.03	8	0.25	0.03	8	8	NA	NA	NA	blaCMY-2	NA
16-AB02207	2016	BfR	Germany	Germany	Wild_animals	Deer	Other	NA	0	NA	NA	Microdilution	NA	>64	8	16	<=0.03	>128	8	>64	<=1	16	>32	>1024	<=8	32	<=0.25	64	0.25	4	4	<=0.03	8	<=0.12	0.03	8	8	NA	NA	NA	blaCMY-2	NA
16-AB02208	2016	BfR	Germany	Germany	Livestock	Cattle	Other	NA	0	NA	NA	Microdilution	NA	>64	8	16	<=0.03	>128	0.5	<=2	<=1	<=0.5	<=0.25	16	<=8	4	<=0.25	128	0.25	4	8	<=0.03	8	0.25	0.06	8	16	NA	NA	NA	blaCMY-2	NA
16-AB02209	2016	BfR	Germany	Germany	Livestock	Broiler_chickens	Meat	NA	0	NA	NA	Microdilution	NA	>64	4	4	<=0.03	>128	4	<=2	<=1	<=0.5	<=0.25	<=8	<=8	4	<=0.25	16	1	0.12	0.12	<=0.03	16	0.25	0.03	4	4	NA	blaTEM-52	NA	NA	NA
16-AB02210	2016	BfR	Germany	Germany	Livestock	Turkeys	Meat	NA	0	NA	NA	Microdilution	NA	>64	8	8	<=0.03	>128	>8	>64	<=1	<=0.5	<=0.25	<=8	<=8	8	0.5	8	8	0.12	0.25	<=0.03	8	0.25	<=0.015	64	4	blaCTX-M-15	NA	NA	NA	NA
16-AB02212	2016	BfR	Germany	Germany	Livestock	Broiler_chickens	Meat	NA	0	NA	NA	Microdilution	NA	>64	8	1	<=0.03	128	0.25	<=2	<=1	<=0.5	<=0.25	>1024	<=8	4	<=0.25	4	8	0.06	0.25	<=0.03	4	0.25	<=0.015	64	4	blaCTX-M-1	NA	NA	NA	NA
16-AB02223	2016	BfR	Germany	Germany	Wild_animals	Deer	Other	NA	0	NA	NA	Microdilution	NA	>64	8	1	<=0.03	>128	2	>64	<=1	<=0.5	<=0.25	>1024	<=8	8	<=0.25	4	4	0.06	0.12	<=0.03	8	0.25	<=0.015	32	2	blaCTX-M-1	NA	NA	NA	NA
16-AB02224	2016	BfR	Germany	Germany	Livestock	Pigs	Other	NA	0	NA	NA	Microdilution	NA	>64	8	1	<=0.03	>128	8	>64	<=1	<=0.5	<=0.25	>1024	<=8	4	0.5	4	8	0.06	0.12	<=0.03	4	<=0.12	<=0.015	32	2	blaCTX-M-1	NA	NA	NA	NA
16-AB02225	2016	BfR	Germany	Germany	Livestock	Pigs	Faeces/manure	NA	0	NA	NA	Microdilution	NA	>64	8	2	<=0.03	>128	0.5	<=2	<=1	1	<=0.25	>1024	<=8	8	<=0.25	4	8	0.06	0.25	<=0.03	8	0.5	<=0.015	32	2	blaCTX-M-1	NA	NA	NA	NA
16-AB02228	2016	BfR	Germany	Germany	Livestock	Turkeys	Meat	NA	0	NA	NA	Microdilution	NA	>64	8	1	<=0.03	>128	>8	64	<=1	<=0.5	>32	>1024	<=8	32	<=0.25	4	8	0.06	0.25	<=0.03	8	<=0.12	<=0.015	32	2	blaCTX-M-1	NA	NA	NA	NA
16-AB02231	2016	BfR	Germany	Germany	Livestock	Cattle	Other	NA	0	NA	NA	Microdilution	NA	>64	8	1	<=0.03	>128	8	<=2	<=1	2	<=0.25	<=8	<=8	8	<=0.25	4	8	0.06	0.25	<=0.03	8	0.25	<=0.015	32	1	blaCTX-M-1	NA	NA	NA	NA
16-AB02267	2016	BfR	Germany	Germany	Wild_animals	Deer	Other	NA	0	NA	NA	Microdilution	NA	>64	8	16	<=0.03	>128	>8	>64	<=1	>32	>32	>1024	<=8	8	<=0.25	8	32	0.06	0.25	<=0.03	8	<=0.12	0.03	64	16	blaCTX-M-15	NA	NA	NA	NA
16-AB02301	2016	BfR	Germany	Germany	Wild_animals	Deer	Faeces/manure	NA	0	NA	NA	Microdilution	NA	>64	8	16	<=0.03	>128	0.25	<=2	<=1	<=0.5	<=0.25	<=8	<=8	8	<=0.25	4	1	0.06	0.12	<=0.03	4	<=0.12	<=0.015	8	8	NA	blaTEM-52	NA	NA	NA
16-AB02304	2016	BfR	Germany	Germany	Livestock	Broiler_chickens	Meat	NA	0	NA	NA	Microdilution	NA	>64	8	16	<=0.03	>128	8	<=2	<=1	<=0.5	>32	>1024	32	8	<=0.25	64	0.25	8	8	<=0.03	8	0.5	0.03	8	8	NA	NA	NA	blaCMY-2	NA
16-AB02305	2016	BfR	Germany	Germany	Livestock	Broiler_chickens	Meat	NA	0	NA	NA	Microdilution	NA	>64	8	2	<=0.03	>128	0.25	64	<=1	1	<=0.25	>1024	<=8	8	<=0.25	4	8	0.12	0.25	<=0.03	8	<=0.12	<=0.015	32	2	blaCTX-M-1	NA	NA	NA	NA
16-AB02307	2016	BfR	Germany	Germany	Livestock	Broiler_chickens	Meat	NA	0	NA	NA	Microdilution	NA	>64	4	16	<=0.03	8	0.5	<=2	<=1	<=0.5	<=0.25	<=8	<=8	8	<=0.25	4	0.5	0.06	0.12	<=0.03	4	0.25	<=0.015	4	16	NA	NA	blaSHV-12	NA	NA
16-AB02308	2016	BfR	Germany	Germany	Livestock	Broiler_chickens	Meat	NA	0	NA	NA	Microdilution	NA	>64	2	8	<=0.03	16	0.5	<=2	<=1	<=0.5	<=0.25	<=8	<=8	4	<=0.25	2	0.25	0.06	0.12	<=0.03	4	<=0.12	<=0.015	2	8	NA	NA	blaSHV-12	NA	NA
16-AB02309	2016	BfR	Germany	Germany	Livestock	Broiler_chickens	Meat	NA	0	NA	NA	Microdilution	NA	>64	8	8	<=0.03	>128	>8	>64	4	1	>32	>1024	<=8	4	<=0.25	4	32	0.06	0.12	<=0.03	8	0.25	<=0.015	128	8	blaCTX-M-15	NA	NA	NA	NA
16-AB02310	2016	BfR	Germany	Germany	Livestock	Broiler_chickens	Meat	NA	0	NA	NA	Microdilution	NA	>64	8	16	<=0.03	>128	0.5	<=2	<=1	<=0.5	<=0.25	16	<=8	4	<=0.25	128	0.25	16	8	<=0.03	8	0.25	0.06	8	16	NA	NA	NA	blaCMY-2	NA
16-AB02327	2016	BfR	Germany	Germany	Livestock	Turkeys	Meat	NA	0	NA	NA	Microdilution	NA	>64	8	1	<=0.03	<=4	<=0.015	64	<=1	<=0.5	<=0.25	<=8	<=8	4	<=0.25	4	8	0.06	0.12	<=0.03	4	0.25	<=0.015	32	1	blaCTX-M-1	NA	NA	NA	NA
16-AB02329	2016	BfR	Germany	Germany	Livestock	Turkeys	Meat	NA	0	NA	NA	Microdilution	NA	>64	8	2	<=0.03	<=4	<=0.015	<=2	<=1	<=0.5	<=0.25	<=8	<=8	8	<=0.25	4	16	0.06	0.25	<=0.03	8	<=0.12	0.03	64	2	blaCTX-M-1	NA	NA	NA	NA
16-AB02331	2016	BfR	Germany	Germany	Livestock	Turkeys	Other	Sample taken from the caecum	0	NA	NA	Microdilution	NA	>64	8	1	<=0.03	>128	8	<=2	<=1	1	<=0.25	<=8	<=8	4	<=0.25	4	16	0.06	0.12	<=0.03	8	<=0.12	<=0.015	32	1	blaCTX-M-65	NA	NA	NA	NA
16-AB02332	2016	BfR	Germany	Germany	Livestock	Turkeys	Other	Sample taken from the caecum	0	NA	NA	Microdilution	NA	>64	8	1	<=0.03	>128	>8	<=2	<=1	1	<=0.25	<=8	<=8	4	<=0.25	4	8	0.06	0.12	<=0.03	8	0.25	<=0.015	32	2	blaCTX-M-1	NA	NA	NA	NA
16-AB02333	2016	BfR	Germany	Germany	Livestock	Turkeys	Other	Sample taken from the caecum	0	NA	NA	Microdilution	NA	>64	8	1	<=0.03	>128	8	<=2	<=1	<=0.5	<=0.25	<=8	<=8	8	<=0.25	4	8	0.06	0.12	<=0.03	8	0.25	<=0.015	32	1	blaCTX-M-14	NA	NA	NA	NA
16-AB02335	2016	BfR	Germany	Germany	Livestock	Turkeys	Other	Sample taken from the caecum	0	NA	NA	Microdilution	NA	>64	8	2	<=0.03	<=4	<=0.015	>64	<=1	<=0.5	<=0.25	>1024	<=8	8	<=0.25	8	32	0.06	0.25	<=0.03	8	0.25	<=0.015	64	2	blaCTX-M-1	NA	NA	NA	NA
16-AB02336	2016	BfR	Germany	Germany	Livestock	Broiler_chickens	Other	Sample taken from the caecum	0	NA	NA	Microdilution	NA	>64	8	8	<=0.03	<=4	<=0.015	>64	<=1	32	<=0.25	>1024	<=8	8	<=0.25	64	0.25	4	8	<=0.03	8	0.25	0.06	8	8	NA	NA	NA	blaCMY-2	NA
16-AB02337	2016	BfR	Germany	Germany	Livestock	Broiler_chickens	Other	Sample taken from the caecum	0	NA	NA	Microdilution	NA	>64	8	2	<=0.03	64	0.25	<=2	<=1	<=0.5	<=0.25	>1024	<=8	4	<=0.25	8	16	0.06	0.12	<=0.03	8	0.25	<=0.015	32	1	blaCTX-M-1	NA	NA	NA	NA
16-AB02338	2016	BfR	Germany	Germany	Livestock	Broiler_chickens	Other	Sample taken from the caecum	0	NA	NA	Microdilution	NA	>64	8	16	<=0.03	>128	0.5	<=2	<=1	1	<=0.25	16	<=8	4	<=0.25	128	0.25	8	8	0.06	32	0.25	0.06	8	32	NA	NA	NA	blaCMY-2	NA
16-AB02339	2016	BfR	Germany	Germany	Livestock	Broiler_chickens	Other	Sample taken from the caecum	0	NA	NA	Microdilution	NA	>64	8	16	<=0.03	>128	0.5	64	<=1	>32	<=0.25	>1024	<=8	4	<=0.25	64	0.25	8	8	<=0.03	8	0.5	0.06	8	8	NA	NA	NA	blaCMY-2	NA
16-AB02340	2016	BfR	Germany	Germany	Livestock	Turkeys	Other	Sample taken from the caecum	0	NA	NA	Microdilution	NA	>64	4	16	<=0.03	16	1	<=2	<=1	<=0.5	<=0.25	<=8	<=8	8	<=0.25	8	0.5	0.06	0.25	<=0.03	8	<=0.12	<=0.015	4	16	NA	NA	blaSHV-12	NA	NA
16-AB02341	2016	BfR	Germany	Germany	Livestock	Turkeys	Other	Sample taken from the caecum	0	NA	NA	Microdilution	NA	>64	8	2	<=0.03	8	0.25	<=2	<=1	<=0.5	0.5	>1024	32	8	<=0.25	4	0.5	0.06	0.12	<=0.03	4	<=0.12	<=0.015	4	4	NA	blaTEM-52	NA	NA	NA
16-AB02342	2016	BfR	Germany	Germany	Livestock	Turkeys	Other	Sample taken from the caecum	0	NA	NA	Microdilution	NA	>64	8	1	<=0.03	>128	8	<=2	<=1	2	<=0.25	<=8	<=8	4	0.5	4	8	0.06	0.12	<=0.03	4	0.25	<=0.015	32	1	blaCTX-M-1	NA	NA	NA	NA
16-AB02343	2016	BfR	Germany	Germany	Livestock	Turkeys	Other	Sample taken from the caecum	0	NA	NA	Microdilution	NA	>64	8	16	<=0.03	>128	>8	>64	<=1	>32	>32	>1024	<=8	8	<=0.25	4	32	0.06	0.25	<=0.03	8	0.25	0.03	128	16	blaCTX-M-15	NA	NA	NA	NA
16-AB02344	2016	BfR	Germany	Germany	Livestock	Turkeys	Other	Sample taken from the caecum	0	NA	NA	Microdilution	NA	>64	8	1	<=0.03	>128	8	<=2	<=1	<=0.5	<=0.25	<=8	<=8	8	<=0.25	4	8	0.06	0.12	<=0.03	8	0.5	<=0.015	16	1	blaCTX-M-1	NA	NA	NA	NA
16-AB02345	2016	BfR	Germany	Germany	Livestock	Broiler_chickens	Other	Sample taken from the caecum	0	NA	NA	Microdilution	NA	>64	4	8	<=0.03	<=4	0.03	<=2	<=1	1	>32	<=8	<=8	8	<=0.25	8	0.5	0.12	0.12	<=0.03	8	0.5	<=0.015	2	8	NA	blaTEM-52	NA	NA	NA
16-AB02346	2016	BfR	Germany	Germany	Livestock	Broiler_chickens	Other	Sample taken from the caecum	0	NA	NA	Microdilution	NA	>64	8	0.5	<=0.03	>128	0.25	<=2	<=1	<=0.5	<=0.25	<=8	<=8	4	<=0.25	4	4	0.06	0.12	<=0.03	4	<=0.12	<=0.015	16	0.5	blaCTX-M-1	NA	NA	NA	NA
16-AB02347	2016	BfR	Germany	Germany	Livestock	Turkeys	Other	Sample taken from the caecum	0	NA	NA	Microdilution	NA	>64	8	0.5	<=0.03	128	0.25	>64	<=1	<=0.5	<=0.25	>1024	<=8	4	0.5	4	8	0.06	0.12	<=0.03	4	<=0.12	<=0.015	16	0.5	blaCTX-M-1	NA	NA	NA	NA
16-AB02348	2016	BfR	Germany	Germany	Livestock	Turkeys	Other	Sample taken from the caecum	0	NA	NA	Microdilution	NA	>64	4	8	<=0.03	8	0.5	<=2	<=1	<=0.5	<=0.25	<=8	<=8	<=2	<=0.25	64	0.25	4	4	0.06	8	0.25	0.06	8	4	NA	NA	NA	blaCMY-2	NA
16-AB02349	2016	BfR	Germany	Germany	Livestock	Turkeys	Other	Sample taken from the caecum	0	NA	NA	Microdilution	NA	>64	8	4	<=0.03	16	0.5	64	<=1	<=0.5	<=0.25	>1024	<=8	4	<=0.25	4	8	0.06	0.25	<=0.03	8	<=0.12	<=0.015	128	8	blaCTX-M-15	NA	NA	NA	NA
16-AB02350	2016	BfR	Germany	Germany	Livestock	Turkeys	Other	Sample taken from the caecum	0	NA	NA	Microdilution	NA	>64	8	1	<=0.03	>128	8	<=2	<=1	1	<=0.25	<=8	<=8	4	<=0.25	4	4	0.06	0.12	<=0.03	8	<=0.12	<=0.015	32	1	blaCTX-M-1	NA	NA	NA	NA
16-AB02351	2016	BfR	Germany	Germany	Livestock	Turkeys	Other	Sample taken from the caecum	0	NA	NA	Microdilution	NA	>64	8	1	<=0.03	64	0.12	>64	<=1	<=0.5	<=0.25	<=8	<=8	8	0.5	8	8	0.06	0.12	<=0.03	8	<=0.12	<=0.015	32	1	blaCTX-M-14	NA	NA	NA	NA
16-AB02352	2016	BfR	Germany	Germany	Livestock	Broiler_chickens	Other	Sample taken from the caecum	0	NA	NA	Microdilution	NA	>64	8	16	<=0.03	8	0.5	4	<=1	<=0.5	<=0.25	16	<=8	8	<=0.25	16	0.5	0.12	0.12	<=0.03	8	<=0.12	<=0.015	4	16	NA	NA	blaSHV-12	NA	NA
16-AB02353	2016	BfR	Germany	Germany	Livestock	Broiler_chickens	Other	Sample taken from the caecum	0	NA	NA	Microdilution	NA	>64	8	2	<=0.03	<=4	0.03	>64	<=1	<=0.5	<=0.25	>1024	<=8	8	0.5	8	32	0.06	0.25	<=0.03	8	<=0.12	<=0.015	64	2	blaCTX-M-1	NA	NA	NA	NA
16-AB02354	2016	BfR	Germany	Germany	Livestock	Broiler_chickens	Other	Sample taken from the caecum	0	NA	NA	Microdilution	NA	>64	8	8	<=0.03	<=4	<=0.015	64	<=1	32	<=0.25	>1024	<=8	4	<=0.25	64	0.25	8	4	<=0.03	4	<=0.12	0.03	8	8	NA	NA	NA	blaCMY-2	NA
16-AB02355	2016	BfR	Germany	Germany	Livestock	Broiler_chickens	Other	Sample taken from the caecum	0	NA	NA	Microdilution	NA	>64	8	1	<=0.03	<=4	<=0.015	64	<=1	<=0.5	>32	>1024	<=8	8	<=0.25	4	4	0.06	0.12	<=0.03	4	<=0.12	<=0.015	32	1	blaCTX-M-1	NA	NA	NA	NA
16-AB02356	2016	BfR	Germany	Germany	Livestock	Turkeys	Other	Sample taken from the caecum	0	NA	NA	Microdilution	NA	>64	8	8	<=0.03	>128	8	<=2	<=1	<=0.5	>32	>1024	64	4	<=0.25	4	0.5	0.06	0.12	<=0.03	4	0.25	<=0.015	4	8	NA	NA	blaSHV-12	NA	NA
16-AB02359	2016	BfR	Germany	Germany	Livestock	Turkeys	Meat	NA	0	NA	NA	Microdilution	NA	>64	8	2	<=0.03	128	0.25	>64	<=1	<=0.5	>32	>1024	<=8	4	0.5	16	32	0.12	0.25	<=0.03	8	0.25	0.03	64	2	blaCTX-M-1	NA	NA	NA	NA
16-AB02360	2016	BfR	Germany	Germany	Livestock	Turkeys	Meat	NA	0	NA	NA	Microdilution	NA	>64	4	4	<=0.03	8	0.25	<=2	<=1	<=0.5	<=0.25	>1024	32	4	<=0.25	8	1	0.06	0.12	<=0.03	4	<=0.12	0.03	4	4	NA	blaTEM-52	NA	NA	NA
16-AB02364	2016	BfR	Germany	Germany	Livestock	Turkeys	Meat	NA	0	NA	NA	Microdilution	NA	>64	8	8	<=0.03	>128	>8	>64	<=1	<=0.5	<=0.25	>1024	64	8	<=0.25	8	8	0.12	0.12	<=0.03	8	<=0.12	<=0.015	32	4	blaCTX-M-15	NA	NA	NA	NA
16-AB02365	2016	BfR	Germany	Germany	Livestock	Turkeys	Meat	NA	0	NA	NA	Microdilution	NA	>64	8	2	<=0.03	>128	>8	>64	<=1	<=0.5	>32	>1024	>128	8	<=0.25	8	16	0.06	0.25	<=0.03	8	0.25	0.03	64	2	blaCTX-M-1	NA	NA	NA	NA
16-AB02384	2016	BfR	Germany	Germany	Livestock	Broiler_chickens	Faeces/manure	NA	0	NA	NA	Microdilution	NA	>64	8	8	<=0.03	<=4	<=0.015	<=2	<=1	<=0.5	<=0.25	<=8	<=8	4	<=0.25	4	1	0.06	0.12	<=0.03	8	0.25	<=0.015	4	4	NA	blaTEM-52	NA	NA	NA
16-AB02386	2016	BfR	Germany	Germany	Livestock	Broiler_chickens	Faeces/manure	NA	0	NA	NA	Microdilution	NA	>64	8	1	<=0.03	>128	8	<=2	<=1	<=0.5	<=0.25	<=8	<=8	8	<=0.25	4	4	0.06	0.12	<=0.03	8	0.25	<=0.015	32	1	blaCTX-M-1	NA	NA	NA	NA
16-AB02387	2016	BfR	Germany	Germany	Livestock	Turkeys	Meat	NA	0	NA	NA	Microdilution	NA	>64	8	1	<=0.03	>128	>8	<=2	<=1	1	<=0.25	<=8	<=8	8	<=0.25	4	8	0.06	0.12	<=0.03	4	0.25	<=0.015	32	1	blaCTX-M-1, blaCTX-M-36	NA	NA	NA	NA
16-AB02388	2016	BfR	Germany	Germany	Livestock	Turkeys	Meat	NA	0	NA	NA	Microdilution	NA	>64	8	4	<=0.03	>128	>8	<=2	<=1	<=0.5	<=0.25	<=8	<=8	8	<=0.25	4	8	0.06	0.12	<=0.03	8	<=0.12	<=0.015	32	4	blaCTX-M-15	NA	NA	NA	NA
16-AB02395	2016	BfR	Germany	Germany	Livestock	Broiler_chickens	Other	Sample taken from the caecum	0	NA	NA	Microdilution	NA	>64	2	16	<=0.03	>128	4	<=2	<=1	<=0.5	<=0.25	<=8	<=8	8	<=0.25	4	0.25	0.06	0.12	<=0.03	8	<=0.12	<=0.015	4	16	NA	NA	blaSHV-12	NA	NA
16-AB02397	2016	BfR	Germany	Germany	Livestock	Turkeys	Meat	NA	0	NA	NA	Microdilution	NA	>64	8	1	<=0.03	>128	>8	>64	<=1	<=0.5	>32	>1024	<=8	64	<=0.25	4	8	0.06	0.12	<=0.03	8	<=0.12	<=0.015	32	1	blaCTX-M-1	NA	NA	NA	NA
16-AB02400	2016	BfR	Germany	Germany	Livestock	Turkeys	Meat	NA	0	NA	NA	Microdilution	NA	>64	8	4	<=0.03	>128	>8	<=2	<=1	<=0.5	<=0.25	<=8	<=8	4	<=0.25	4	4	0.06	0.12	<=0.03	4	<=0.12	<=0.015	32	4	blaCTX-M-15	NA	NA	NA	NA
16-AB02401	2016	BfR	Germany	Germany	Livestock	Turkeys	Meat	NA	0	NA	NA	Microdilution	NA	>64	8	16	<=0.03	>128	0.25	>64	<=1	<=0.5	>32	>1024	64	4	<=0.25	8	2	0.06	0.12	<=0.03	4	<=0.12	<=0.015	8	64	NA	NA	blaSHV-12	NA	NA
16-AB02405	2016	BfR	Germany	Germany	Livestock	Broiler_chickens	Other	Sample taken from the caecum	0	NA	NA	Microdilution	NA	>64	2	16	<=0.03	128	0.25	>64	<=1	1	>32	>1024	32	16	<=0.25	4	0.5	0.06	0.12	<=0.03	4	<=0.12	<=0.015	2	8	NA	NA	blaSHV-12	NA	NA
16-AB02409	2016	BfR	Germany	Germany	Livestock	Broiler_chickens	Meat	NA	0	NA	NA	Microdilution	NA	>64	4	16	<=0.03	>128	2	>64	<=1	<=0.5	>32	>1024	<=8	8	<=0.25	4	0.5	0.06	0.12	<=0.03	4	<=0.12	<=0.015	4	16	NA	NA	blaSHV-12	NA	NA
16-AB02412	2016	BfR	Germany	Germany	Livestock	Turkeys	Meat	NA	0	NA	NA	Microdilution	NA	>64	8	1	<=0.03	128	0.25	<=2	<=1	<=0.5	<=0.25	16	<=8	<=2	<=0.25	8	8	0.06	0.12	<=0.03	8	<=0.12	<=0.015	32	1	blaCTX-M-1	NA	NA	NA	NA
16-AB02413	2016	BfR	Germany	Germany	Livestock	Turkeys	Meat	NA	0	NA	NA	Microdilution	NA	>64	8	1	<=0.03	>128	>8	64	<=1	1	<=0.25	>1024	<=8	4	<=0.25	4	16	0.06	0.12	<=0.03	8	<=0.12	<=0.015	32	1	blaCTX-M-1	NA	NA	NA	NA
16-AB02414	2016	BfR	Germany	Germany	Livestock	Broiler_chickens	Meat	NA	0	NA	NA	Microdilution	NA	>64	8	8	<=0.03	>128	>8	64	<=1	<=0.5	<=0.25	<=8	16	8	<=0.25	4	8	0.12	0.12	<=0.03	16	<=0.12	<=0.015	64	8	blaCTX-M-15	NA	NA	NA	NA
16-AB02415	2016	BfR	Germany	Germany	Livestock	Turkeys	Meat	NA	0	NA	NA	Microdilution	NA	>64	8	2	<=0.03	>128	>8	64	<=1	32	>32	>1024	>128	8	<=0.25	8	16	0.12	0.25	<=0.03	8	<=0.12	<=0.015	64	2	blaCTX-M-1	NA	NA	NA	NA
16-AB02416	2016	BfR	Germany	Germany	Livestock	Turkeys	Meat	NA	0	NA	NA	Microdilution	NA	>64	8	8	<=0.03	>128	>8	>64	<=1	1	<=0.25	<=8	<=8	8	<=0.25	4	8	0.12	0.12	<=0.03	8	<=0.12	<=0.015	32	4	blaCTX-M-15	NA	NA	NA	NA
16-AB02417	2016	BfR	Germany	Germany	Livestock	Turkeys	Meat	NA	0	NA	NA	Microdilution	NA	>64	8	4	<=0.03	>128	>8	>64	<=1	32	>32	>1024	>128	16	<=0.25	8	32	0.06	0.12	<=0.03	8	0.25	0.03	64	4	blaCTX-M-1	NA	NA	NA	NA
16-AB02418	2016	BfR	Germany	Germany	Livestock	Turkeys	Meat	NA	0	NA	NA	Microdilution	NA	>64	8	16	<=0.03	>128	0.25	64	<=1	2	<=0.25	<=8	<=8	4	<=0.25	64	0.5	8	8	<=0.03	8	0.25	0.06	32	8	NA	NA	NA	blaCMY-2	NA
16-AB02419	2016	BfR	Germany	Germany	Livestock	Turkeys	Meat	NA	0	NA	NA	Microdilution	NA	>64	8	2	<=0.03	>128	8	64	<=1	16	<=0.25	>1024	>128	8	<=0.25	8	16	0.12	0.25	<=0.03	8	<=0.12	<=0.015	64	2	blaCTX-M-1	NA	NA	NA	NA
16-AB02420	2016	BfR	Germany	Germany	Livestock	Turkeys	Meat	NA	0	NA	NA	Microdilution	NA	>64	8	8	<=0.03	8	1	32	<=1	32	>32	>1024	128	4	<=0.25	4	16	0.06	0.12	<=0.03	4	<=0.12	<=0.015	64	4	blaCTX-M-15	NA	NA	NA	NA
16-AB02421	2016	BfR	Germany	Germany	Livestock	Turkeys	Meat	NA	0	NA	NA	Microdilution	NA	>64	8	2	<=0.03	8	0.25	>64	<=1	<=0.5	<=0.25	>1024	32	4	<=0.25	4	1	0.06	0.12	<=0.03	4	<=0.12	<=0.015	4	8	NA	blaTEM-52	NA	NA	NA
16-AB02431	2016	BfR	Germany	Germany	Livestock	Broiler_chickens	Meat	NA	0	NA	NA	Microdilution	NA	>64	8	0.5	<=0.03	128	1	32	<=1	<=0.5	>32	>1024	128	8	<=0.25	4	2	0.06	0.12	<=0.03	2	0.25	<=0.015	8	0.25	blaCTX-M-1	NA	NA	NA	NA
16-AB02433	2016	BfR	Germany	Germany	Livestock	Broiler_chickens	Meat	NA	0	NA	NA	Microdilution	NA	>64	8	1	<=0.03	<=4	<=0.015	>64	<=1	1	1	>1024	<=8	4	<=0.25	4	4	0.06	0.25	<=0.03	8	0.25	<=0.015	16	1	blaCTX-M-1	NA	NA	NA	NA
16-AB02439	2016	BfR	Germany	Germany	Livestock	Turkeys	Meat	NA	0	NA	NA	Microdilution	NA	>64	8	8	<=0.03	<=4	0.03	<=2	<=1	<=0.5	<=0.25	<=8	<=8	8	<=0.25	128	0.25	8	8	<=0.03	4	0.25	0.06	8	8	NA	NA	NA	blaCMY-2	NA
16-AB02440	2016	BfR	Germany	Germany	Livestock	Turkeys	Meat	NA	0	NA	NA	Microdilution	NA	>64	8	1	<=0.03	<=4	0.03	<=2	4	32	<=0.25	>1024	32	4	<=0.25	8	8	0.06	0.12	<=0.03	8	<=0.12	<=0.015	32	1	blaCTX-M-1	NA	NA	NA	NA
16-AB02441	2016	BfR	Germany	Germany	Livestock	Turkeys	Meat	NA	0	NA	NA	Microdilution	NA	>64	8	2	<=0.03	>128	8	64	<=1	>32	>32	>1024	>128	8	<=0.25	8	16	0.12	0.25	<=0.03	8	0.25	<=0.015	64	4	blaCTX-M-1	NA	NA	NA	NA
16-AB02442	2016	BfR	Germany	Germany	Livestock	Turkeys	Meat	NA	0	NA	NA	Microdilution	NA	>64	2	16	<=0.03	<=4	<=0.015	<=2	<=1	<=0.5	0.5	>1024	32	<=2	<=0.25	8	0.5	0.06	0.12	<=0.03	4	<=0.12	<=0.015	2	8	NA	NA	blaSHV-12	NA	NA
16-AB02446	2016	BfR	Germany	Germany	Livestock	Broiler_chickens	Meat	NA	0	NA	NA	Microdilution	NA	>64	8	1	<=0.03	32	0.25	16	<=1	1	<=0.25	>1024	<=8	<=2	<=0.25	2	4	0.06	0.12	<=0.03	2	<=0.12	<=0.015	16	0.5	blaCTX-M-1	NA	NA	NA	NA
16-AB02447	2016	BfR	Germany	Germany	Livestock	Broiler_chickens	Meat	NA	0	NA	NA	Microdilution	NA	>64	8	8	<=0.03	128	0.5	64	<=1	32	<=0.25	>1024	<=8	4	<=0.25	64	0.25	8	8	<=0.03	4	0.25	0.03	8	8	NA	NA	NA	blaCMY-2	NA
16-AB02448	2016	BfR	Germany	Germany	Livestock	Broiler_chickens	Meat	NA	0	NA	NA	Microdilution	NA	>64	8	1	<=0.03	<=4	<=0.015	<=2	<=1	<=0.5	0.5	<=8	<=8	8	<=0.25	4	4	0.06	0.12	<=0.03	8	0.25	<=0.015	16	0.5	blaCTX-M-1	NA	NA	NA	NA
16-AB02455	2016	BfR	Germany	Germany	Livestock	Turkeys	Meat	NA	0	NA	NA	Microdilution	NA	>64	8	8	<=0.03	<=4	0.25	64	<=1	<=0.5	<=0.25	>1024	<=8	<=2	<=0.25	4	16	0.06	0.12	<=0.03	4	<=0.12	<=0.015	64	8	blaCTX-M-1	NA	NA	NA	NA
16-AB02456	2016	BfR	Germany	Germany	Livestock	Turkeys	Meat	NA	0	NA	NA	Microdilution	NA	>64	8	1	<=0.03	<=4	<=0.015	<=2	<=1	1	>32	>1024	<=8	4	<=0.25	4	16	0.06	0.12	<=0.03	4	<=0.12	<=0.015	32	1	blaCTX-M-1	NA	NA	NA	NA
16-AB02458	2016	BfR	Germany	Germany	Livestock	Broiler_chickens	Other	Sample taken from the caecum	0	NA	NA	Microdilution	NA	>64	4	16	<=0.03	<=4	0.25	<=2	<=1	<=0.5	<=0.25	>1024	<=8	4	<=0.25	2	0.25	0.06	0.12	<=0.03	2	<=0.12	<=0.015	2	8	NA	NA	blaSHV-12	NA	NA
16-AB02461	2016	BfR	Germany	Germany	Livestock	Broiler_chickens	Other	Sample taken from the caecum	0	NA	NA	Microdilution	NA	>64	8	1	<=0.03	>128	0.25	>64	<=1	<=0.5	>32	>1024	>128	4	<=0.25	8	8	0.06	0.25	<=0.03	8	<=0.12	0.03	32	1	blaCTX-M-1	NA	NA	NA	NA
16-AB02462	2016	BfR	Germany	Germany	Livestock	Broiler_chickens	Other	Sample taken from the caecum	0	NA	NA	Microdilution	NA	>64	4	4	<=0.03	<=4	<=0.015	<=2	<=1	1	<=0.25	16	<=8	<=2	<=0.25	32	0.12	2	4	<=0.03	4	<=0.12	<=0.015	4	4	NA	NA	NA	blaCMY-2	NA
16-AB02481	2016	BfR	Germany	Germany	Livestock	Broiler_chickens	Meat	NA	0	NA	NA	Microdilution	NA	>64	8	1	<=0.03	128	0.25	>64	<=1	<=0.5	<=0.25	>1024	<=8	4	<=0.25	4	4	0.06	0.12	0.06	8	0.25	<=0.015	16	1	blaCTX-M-1	NA	NA	NA	NA
16-AB02482	2016	BfR	Germany	Germany	Livestock	Broiler_chickens	Meat	NA	0	NA	NA	Microdilution	NA	>64	8	1	<=0.03	<=4	<=0.015	16	<=1	<=0.5	0.5	>1024	<=8	<=2	<=0.25	2	4	0.06	0.12	<=0.03	2	<=0.12	<=0.015	16	0.5	blaCTX-M-1	NA	NA	NA	NA
16-AB02483	2016	BfR	Germany	Germany	Livestock	Broiler_chickens	Meat	NA	0	NA	NA	Microdilution	NA	>64	8	1	<=0.03	>128	0.5	<=2	<=1	1	<=0.25	>1024	<=8	4	<=0.25	8	16	0.06	0.25	<=0.03	4	0.25	<=0.015	64	1	blaCTX-M-1	NA	NA	NA	NA
16-AB02492	2016	BfR	Germany	Germany	Livestock	Broiler_chickens	Meat	NA	0	NA	NA	Microdilution	NA	>64	8	1	<=0.03	<=4	<=0.015	64	<=1	<=0.5	<=0.25	>1024	<=8	8	<=0.25	4	8	0.06	0.12	<=0.03	8	0.25	<=0.015	16	1	blaCTX-M-1	NA	NA	NA	NA
16-AB02493	2016	BfR	Germany	Germany	Livestock	Turkeys	Meat	NA	0	NA	NA	Microdilution	NA	>64	8	0.5	<=0.03	8	0.5	<=2	<=1	<=0.5	<=0.25	16	<=8	4	<=0.25	8	8	0.06	0.12	<=0.03	4	<=0.12	<=0.015	32	1	blaCTX-M-1	NA	NA	NA	NA
16-AB02494	2016	BfR	Germany	Germany	Livestock	Turkeys	Meat	NA	0	NA	NA	Microdilution	NA	>64	8	8	<=0.03	>128	0.25	<=2	<=1	<=0.5	<=0.25	<=8	<=8	8	<=0.25	8	64	0.06	0.12	<=0.03	4	<=0.12	0.03	128	8	blaCTX-M-15	NA	NA	NA	NA
16-AB02495	2016	BfR	Germany	Germany	Livestock	Broiler_chickens	Meat	NA	0	NA	NA	Microdilution	NA	>64	2	2	<=0.03	>128	4	64	<=1	<=0.5	>32	>1024	<=8	4	0.5	8	0.5	0.06	0.12	<=0.03	8	<=0.12	<=0.015	2	2	NA	blaTEM-52	NA	NA	NA
16-AB02496	2016	BfR	Germany	Germany	Livestock	Broiler_chickens	Other	Sample taken from the caecum	0	NA	NA	Microdilution	NA	>64	2	4	<=0.03	128	0.25	<=2	<=1	<=0.5	<=0.25	<=8	<=8	16	<=0.25	32	0.12	2	2	<=0.03	4	0.25	<=0.015	4	4	NA	NA	NA	blaCMY-2	NA
16-AB02498	2016	BfR	Germany	Germany	Livestock	Broiler_chickens	Other	Sample taken from the caecum	0	NA	NA	Microdilution	NA	>64	8	16	<=0.03	>128	>8	>64	<=1	<=0.5	>32	>1024	<=8	8	<=0.25	8	32	0.06	0.25	<=0.03	8	0.25	0.03	128	16	blaCTX-M-15	NA	NA	NA	NA
16-AB02502	2016	BfR	Germany	Germany	Livestock	Broiler_chickens	Faeces/manure	NA	0	NA	NA	Microdilution	NA	>64	4	16	<=0.03	<=4	0.5	<=2	<=1	<=0.5	<=0.25	<=8	<=8	4	<=0.25	8	1	0.06	0.12	<=0.03	4	0.25	<=0.015	4	32	NA	NA	blaSHV-12	NA	NA
16-AB02508	2016	BfR	Germany	Germany	Wild_animals	Wild_boars	Faeces/manure	NA	0	NA	NA	Microdilution	NA	>64	8	2	<=0.03	<=4	<=0.015	<=2	<=1	1	<=0.25	<=8	<=8	8	<=0.25	4	8	0.06	0.25	<=0.03	4	<=0.12	<=0.015	32	2	blaCTX-M-1	NA	NA	NA	NA
16-AB02509	2016	BfR	Germany	Germany	Wild_animals	Wild_boars	Faeces/manure	NA	0	NA	NA	Microdilution	NA	>64	8	16	<=0.03	>128	>8	64	<=1	<=0.5	>32	>1024	<=8	4	<=0.25	4	16	0.06	0.12	<=0.03	4	<=0.12	<=0.015	64	4	blaCTX-M-15	NA	NA	NA	NA
16-AB02521	2016	BfR	Germany	Germany	Livestock	Turkeys	Faeces/manure	NA	0	NA	NA	Microdilution	NA	>64	8	4	<=0.03	>128	>8	>64	<=1	1	>32	>1024	<=8	16	<=0.25	8	4	0.12	0.12	<=0.03	4	<=0.12	<=0.015	32	4	blaCTX-M-15	NA	NA	NA	NA
16-AB02522	2016	BfR	Germany	Germany	Livestock	Turkeys	Faeces/manure	NA	0	NA	NA	Microdilution	NA	>64	8	8	<=0.03	>128	>8	>64	4	<=0.5	>32	>1024	32	4	<=0.25	8	8	0.06	0.25	<=0.03	8	<=0.12	<=0.015	64	8	blaCTX-M-15	NA	NA	NA	NA
16-AB02528	2016	BfR	Germany	Germany	Fruit_vegetables	Vegetables	Sprouts	NA	0	NA	NA	Microdilution	NA	>64	8	1	<=0.03	16	2	>64	<=1	8	>32	>1024	>128	>64	<=0.25	8	16	0.06	0.25	<=0.03	8	0.25	<=0.015	64	1	blaCTX-M-1	NA	NA	NA	NA
16-AB02529	2016	BfR	Germany	Germany	Livestock	Broiler_chickens	Meat	NA	0	NA	NA	Microdilution	NA	>64	4	8	<=0.03	<=4	<=0.015	64	<=1	<=0.5	<=0.25	>1024	32	4	<=0.25	4	0.25	0.06	0.12	<=0.03	4	<=0.12	<=0.015	4	8	NA	NA	blaSHV-12	NA	NA
16-AB02530	2016	BfR	Germany	Germany	Livestock	Turkeys	Meat	NA	0	NA	NA	Microdilution	NA	>64	8	0.5	<=0.03	>128	>8	>64	<=1	>32	>32	>1024	<=8	16	<=0.25	8	8	0.06	0.12	<=0.03	8	0.25	<=0.015	32	0.5	blaCTX-M-15	NA	NA	NA	NA
16-AB02531	2016	BfR	Germany	Germany	Livestock	Broiler_chickens	Meat	NA	0	NA	NA	Microdilution	NA	>64	4	4	<=0.03	>128	4	<=2	<=1	<=0.5	<=0.25	16	<=8	4	<=0.25	8	0.5	0.12	0.12	<=0.03	8	0.25	<=0.015	4	4	NA	blaTEM-52	NA	NA	NA
16-AB02532	2016	BfR	Germany	Germany	Livestock	Broiler_chickens	Meat	NA	0	NA	NA	Microdilution	NA	>64	8	16	<=0.03	<=4	0.03	<=2	<=1	<=0.5	<=0.25	16	<=8	8	<=0.25	64	0.25	8	8	<=0.03	8	<=0.12	0.03	8	16	NA	NA	NA	blaCMY-2	NA
16-AB02536	2016	BfR	Germany	Germany	Livestock	Turkeys	Meat	NA	0	NA	NA	Microdilution	NA	>64	8	1	<=0.03	<=4	<=0.015	64	<=1	<=0.5	>32	>1024	<=8	4	<=0.25	4	4	0.12	0.12	<=0.03	4	<=0.12	<=0.015	16	4	blaCTX-M-1	NA	NA	NA	NA
16-AB02541	2016	BfR	Germany	Germany	Livestock	Broiler_chickens	Other	Sample taken from the caecum	0	NA	NA	Microdilution	NA	>64	2	8	<=0.03	128	4	<=2	<=1	<=0.5	>32	>1024	<=8	8	<=0.25	8	0.5	0.06	0.12	<=0.03	4	<=0.12	<=0.015	2	8	NA	NA	blaSHV-12	NA	NA
16-AB02558	2016	BfR	Germany	Germany	Livestock	Broiler_chickens	Faeces/manure	NA	0	NA	NA	Microdilution	NA	>64	4	8	<=0.03	<=4	0.25	64	<=1	<=0.5	<=0.25	<=8	<=8	8	<=0.25	8	0.5	0.06	0.12	<=0.03	4	<=0.12	<=0.015	4	8	NA	NA	blaSHV-12	NA	NA
16-AB02559	2016	BfR	Germany	Germany	Livestock	Broiler_chickens	Faeces/manure	NA	0	NA	NA	Microdilution	NA	>64	8	16	<=0.03	<=4	0.03	<=2	2	<=0.5	<=0.25	16	<=8	8	<=0.25	64	0.25	8	8	<=0.03	8	0.25	0.03	16	16	NA	NA	NA	blaCMY-2	NA
16-AB02562	2016	BfR	Germany	Germany	Livestock	Broiler_chickens	Other	Sample taken from the caecum	0	NA	NA	Microdilution	NA	>64	1	1	<=0.03	>128	>8	64	<=1	2	>32	>1024	<=8	8	<=0.25	4	0.25	0.06	0.12	<=0.03	8	0.25	<=0.015	2	1	NA	blaTEM-52	NA	NA	NA
16-AB02565	2016	BfR	Germany	Germany	Livestock	Broiler_chickens	Other	Sample taken from the caecum	0	NA	NA	Microdilution	NA	>64	1	0.5	<=0.03	<=4	<=0.015	<=2	<=1	<=0.5	<=0.25	>1024	<=8	4	<=0.25	4	0.12	0.06	0.25	<=0.03	4	0.25	<=0.015	1	1	NA	blaTEM-52	NA	NA	NA
16-AB02569	2016	BfR	Germany	Germany	Livestock	Broiler_chickens	Other	Sample taken from the caecum	0	NA	NA	Microdilution	NA	>64	2	2	<=0.03	128	0.5	<=2	<=1	1	<=0.25	16	<=8	8	<=0.25	16	0.5	0.12	0.12	<=0.03	8	0.25	<=0.015	2	2	NA	blaTEM-52	NA	NA	NA
16-AB02584	2016	BfR	Germany	Germany	Livestock	Broiler_chickens	Meat	NA	0	NA	NA	Microdilution	NA	>64	4	8	<=0.03	128	0.5	>64	<=1	2	>32	>1024	<=8	8	<=0.25	8	0.5	0.06	0.12	<=0.03	8	0.25	<=0.015	4	32	NA	NA	blaSHV-12	NA	NA
16-AB02585	2016	BfR	Germany	Germany	Livestock	Broiler_chickens	Meat	NA	0	NA	NA	Microdilution	NA	>64	8	8	<=0.03	64	0.12	4	<=1	32	<=0.25	>1024	<=8	4	<=0.25	64	0.25	4	4	<=0.03	4	0.5	0.03	8	8	NA	NA	NA	blaCMY-2	NA
16-AB02586	2016	BfR	Germany	Germany	Livestock	Broiler_chickens	Meat	NA	0	NA	NA	Microdilution	NA	>64	8	2	<=0.03	>128	0.5	<=2	<=1	<=0.5	<=0.25	>1024	64	8	<=0.25	8	8	0.06	0.25	<=0.03	8	0.25	<=0.015	32	2	blaCTX-M-1	NA	NA	NA	NA
16-AB02601	2016	BfR	Germany	Germany	Livestock	Broiler_chickens	Faeces/manure	NA	0	NA	NA	Microdilution	NA	>64	8	16	<=0.03	<=4	0.03	<=2	<=1	<=0.5	0.5	16	<=8	8	<=0.25	128	0.25	8	8	<=0.03	8	0.25	0.03	8	16	NA	NA	NA	blaCMY-2	NA
16-AB02602	2016	BfR	Germany	Germany	Livestock	Broiler_chickens	Meat	NA	0	NA	NA	Microdilution	NA	>64	8	16	<=0.03	>128	>8	>64	<=1	<=0.5	>32	>1024	128	8	<=0.25	8	32	0.12	0.25	0.06	8	0.5	0.03	128	16	blaCTX-M-15	NA	NA	NA	NA
16-AB02603	2016	BfR	Germany	Germany	Livestock	Turkeys	Meat	NA	0	NA	NA	Microdilution	NA	>64	8	1	<=0.03	>128	8	<=2	<=1	1	0.5	16	<=8	8	<=0.25	4	2	0.06	0.12	<=0.03	8	<=0.12	<=0.015	32	1	blaCTX-M-1	NA	NA	NA	NA
16-AB02610	2016	BfR	Germany	Germany	Wild_animals	Wild_boars	Faeces/manure	NA	0	NA	NA	Microdilution	NA	>64	8	4	<=0.03	>128	0.25	<=2	<=1	>32	>32	>1024	128	8	<=0.25	4	32	0.12	0.25	0.06	8	0.25	<=0.015	128	4	blaCTX-M-1	NA	NA	NA	NA
16-AB02612	2016	BfR	Germany	Germany	Livestock	Broiler_chickens	Other	Sample taken from the caecum	0	NA	NA	Microdilution	NA	>64	8	1	<=0.03	<=4	<=0.015	<=2	<=1	<=0.5	0.5	<=8	<=8	8	0.5	4	8	0.06	0.12	<=0.03	8	0.25	<=0.015	16	0.5	blaCTX-M-1	NA	NA	NA	NA
16-AB02614	2016	BfR	Germany	Germany	Livestock	Broiler_chickens	Other	Sample taken from the caecum	0	NA	NA	Microdilution	NA	>64	4	16	<=0.03	<=4	<=0.015	>64	<=1	<=0.5	<=0.25	>1024	<=8	8	<=0.25	4	0.5	0.06	0.12	<=0.03	4	0.25	<=0.015	4	16	NA	NA	blaSHV-12	NA	NA
16-AB02615	2016	BfR	Germany	Germany	Livestock	Turkeys	Meat	NA	0	NA	NA	Microdilution	NA	>64	8	8	<=0.03	>128	>8	64	<=1	32	>32	>1024	<=8	64	<=0.25	8	32	0.06	0.25	<=0.03	16	<=0.12	0.03	64	8	blaCTX-M-15	NA	NA	NA	NA
16-AB02618	2016	BfR	Germany	Germany	Livestock	Broiler_chickens	Meat	NA	0	NA	NA	Microdilution	NA	>64	4	16	<=0.03	>128	>8	64	2	<=0.5	<=0.25	>1024	32	8	0.5	4	1	0.06	0.25	<=0.03	8	0.25	<=0.015	4	32	NA	NA	blaSHV-12	NA	NA
16-AB02619	2016	BfR	Germany	Germany	Livestock	Turkeys	Meat	NA	0	NA	NA	Microdilution	NA	>64	8	4	<=0.03	<=4	<=0.015	>64	<=1	<=0.5	<=0.25	<=8	<=8	<=2	0.5	64	0.25	8	4	<=0.03	8	0.25	0.06	8	8	NA	NA	NA	blaCMY-2	NA
16-AB02622	2016	BfR	Germany	Germany	Livestock	Broiler_chickens	Meat	NA	0	NA	NA	Microdilution	NA	>64	8	1	<=0.03	>128	8	64	4	16	>32	>1024	32	4	<=0.25	4	4	0.06	0.25	<=0.03	4	0.25	<=0.015	32	1	blaCTX-M-1	NA	NA	NA	NA
16-AB02624	2016	BfR	Germany	Germany	Livestock	Broiler_chickens	Meat	NA	0	NA	NA	Microdilution	NA	>64	8	1	<=0.03	<=4	<=0.015	>64	<=1	1	<=0.25	>1024	<=8	8	<=0.25	4	2	0.06	0.12	<=0.03	8	<=0.12	<=0.015	16	1	blaCTX-M-1	NA	NA	NA	NA
16-AB02627	2016	BfR	Germany	Germany	Livestock	Broiler_chickens	Faeces/manure	NA	0	NA	NA	Microdilution	NA	>64	8	16	<=0.03	>128	>8	>64	<=1	<=0.5	1	>1024	<=8	16	0.5	16	16	0.12	0.5	<=0.03	16	<=0.12	0.03	128	16	blaCTX-M-15	NA	NA	NA	NA
16-AB02630	2016	BfR	Germany	Germany	Livestock	Broiler_chickens	Faeces/manure	NA	0	NA	NA	Microdilution	NA	>64	8	16	<=0.03	>128	1	>64	<=1	<=0.5	<=0.25	>1024	64	4	<=0.25	8	0.5	0.06	0.25	<=0.03	8	<=0.12	<=0.015	4	16	NA	NA	blaSHV-12	NA	NA
16-AB02638	2016	BfR	Germany	Germany	Livestock	Turkeys	Other	Sample taken from the caecum	0	NA	NA	Microdilution	NA	>64	8	16	<=0.03	128	0.5	<=2	<=1	<=0.5	<=0.25	<=8	<=8	8	<=0.25	8	0.5	0.06	0.12	<=0.03	4	<=0.12	<=0.015	4	16	NA	NA	blaSHV-12	NA	NA
16-AB02650	2016	BfR	Germany	Germany	Livestock	Broiler_chickens	Meat	NA	0	NA	NA	Microdilution	NA	>64	8	8	<=0.03	<=4	0.03	<=2	<=1	<=0.5	<=0.25	16	<=8	8	<=0.25	64	0.25	8	8	<=0.03	4	<=0.12	0.03	8	8	NA	NA	NA	blaCMY-2	NA
16-AB02651	2016	BfR	Germany	Germany	Livestock	Broiler_chickens	Meat	NA	0	NA	NA	Microdilution	NA	>64	4	8	<=0.03	16	0.5	<=2	<=1	<=0.5	>32	>1024	<=8	4	<=0.25	4	0.25	0.06	0.12	<=0.03	4	<=0.12	<=0.015	2	16	NA	NA	blaSHV-12	NA	NA
16-AB02652	2016	BfR	Germany	Germany	Livestock	Broiler_chickens	Meat	NA	0	NA	NA	Microdilution	NA	>64	8	1	<=0.03	>128	0.25	>64	<=1	<=0.5	<=0.25	>1024	<=8	4	<=0.25	4	32	0.06	0.12	<=0.03	4	0.25	<=0.015	32	1	blaCTX-M-1, blaCTX-M-32	NA	NA	NA	NA
16-AB02653	2016	BfR	Germany	Germany	Livestock	Broiler_chickens	Meat	NA	0	NA	NA	Microdilution	NA	>64	8	1	<=0.03	<=4	<=0.015	<=2	<=1	<=0.5	<=0.25	16	<=8	4	<=0.25	8	16	0.06	0.12	<=0.03	4	0.25	<=0.015	32	2	blaCTX-M-1	NA	NA	NA	NA
16-AB02655	2016	BfR	Germany	Germany	Livestock	Broiler_chickens	Meat	NA	0	NA	NA	Microdilution	NA	>64	8	1	<=0.03	<=4	<=0.015	<=2	<=1	<=0.5	>32	>1024	<=8	8	<=0.25	4	16	0.06	0.12	<=0.03	4	0.25	<=0.015	32	1	blaCTX-M-1	NA	NA	NA	NA
16-AB02657	2016	BfR	Germany	Germany	Livestock	Broiler_chickens	Other	Sample taken from the caecum	0	NA	NA	Microdilution	NA	>64	8	8	<=0.03	<=4	<=0.015	64	<=1	32	<=0.25	>1024	<=8	4	<=0.25	32	0.25	8	4	<=0.03	8	0.25	0.03	8	8	NA	NA	NA	blaCMY-2	NA
16-AB02660	2016	BfR	Germany	Germany	Livestock	Turkeys	Other	Sample taken from the caecum	0	NA	NA	Microdilution	NA	>64	8	16	<=0.03	<=4	<=0.015	<=2	<=1	<=0.5	<=0.25	<=8	<=8	4	<=0.25	64	0.25	8	8	<=0.03	4	0.25	0.03	8	8	NA	NA	NA	blaCMY-2	NA
16-AB02661	2016	BfR	Germany	Germany	Livestock	Turkeys	Other	Sample taken from the caecum	0	NA	NA	Microdilution	NA	>64	8	2	<=0.03	>128	8	64	<=1	32	>32	>1024	>128	8	<=0.25	8	32	0.12	0.25	<=0.03	8	<=0.12	<=0.015	64	2	blaCTX-M-1	NA	NA	NA	NA
16-AB02662	2016	BfR	Germany	Germany	Livestock	Turkeys	Other	Sample taken from the caecum	0	NA	NA	Microdilution	NA	>64	8	1	<=0.03	<=4	<=0.015	>64	<=1	<=0.5	<=0.25	>1024	<=8	8	<=0.25	8	16	0.06	0.25	<=0.03	8	<=0.12	<=0.015	64	4	blaCTX-M-1	NA	NA	NA	NA
16-AB02663	2016	BfR	Germany	Germany	Livestock	Broiler_chickens	Other	Sample taken from the caecum	0	NA	NA	Microdilution	NA	>64	1	1	<=0.03	<=4	<=0.015	>64	<=1	<=0.5	<=0.25	<=8	<=8	8	<=0.25	8	0.25	0.06	0.12	<=0.03	8	0.25	<=0.015	2	2	NA	blaTEM-52	NA	NA	NA
16-AB02664	2016	BfR	Germany	Germany	Livestock	Broiler_chickens	Other	Sample taken from the caecum	0	NA	NA	Microdilution	NA	>64	2	16	<=0.03	<=4	<=0.015	>64	4	1	>32	>1024	<=8	8	<=0.25	8	0.25	0.06	0.12	<=0.03	8	<=0.12	<=0.015	4	16	NA	NA	blaSHV-12	NA	NA
16-AB02665	2016	BfR	Germany	Germany	Livestock	Broiler_chickens	Other	Sample taken from the caecum	0	NA	NA	Microdilution	NA	>64	2	2	<=0.03	<=4	<=0.015	<=2	<=1	<=0.5	>32	<=8	<=8	8	<=0.25	4	0.25	0.06	0.12	<=0.03	8	0.25	<=0.015	2	2	NA	blaTEM-52	NA	NA	NA
16-AB02666	2016	BfR	Germany	Germany	Livestock	Broiler_chickens	Other	Sample taken from the caecum	0	NA	NA	Microdilution	NA	>64	8	2	<=0.03	<=4	0.03	<=2	<=1	<=0.5	<=0.25	>1024	<=8	8	<=0.25	4	8	0.06	0.12	<=0.03	8	0.25	<=0.015	32	1	blaCTX-M-1	NA	NA	NA	NA
16-AB02667	2016	BfR	Germany	Germany	Livestock	Turkeys	Meat	NA	0	NA	NA	Microdilution	NA	>64	8	2	<=0.03	>128	>8	>64	<=1	32	>32	>1024	<=8	16	<=0.25	8	8	0.06	0.25	<=0.03	4	0.25	<=0.015	64	4	blaCTX-M-1	NA	NA	NA	NA
16-AB02668	2016	BfR	Germany	Germany	Livestock	Turkeys	Meat	NA	0	NA	NA	Microdilution	NA	>64	8	16	<=0.03	>128	>8	>64	<=1	32	>32	>1024	<=8	4	<=0.25	8	64	0.06	0.25	<=0.03	8	0.25	0.03	128	16	blaCTX-M-1	NA	NA	NA	NA
16-AB02669	2016	BfR	Germany	Germany	Livestock	Broiler_chickens	Meat	NA	0	NA	NA	Microdilution	NA	>64	8	8	<=0.03	128	0.25	64	<=1	>32	<=0.25	>1024	<=8	4	<=0.25	64	0.25	8	8	<=0.03	4	0.25	0.06	8	16	NA	NA	NA	blaCMY-2	NA
16-AB02671	2016	BfR	Germany	Germany	Livestock	Broiler_chickens	Meat	NA	0	NA	NA	Microdilution	NA	>64	8	1	<=0.03	<=4	<=0.015	64	<=1	1	<=0.25	>1024	<=8	4	<=0.25	4	4	0.06	0.12	<=0.03	4	<=0.12	<=0.015	64	1	blaCTX-M-1	NA	NA	NA	NA
16-AB02673	2016	BfR	Germany	Germany	Livestock	Broiler_chickens	Faeces/manure	NA	0	NA	NA	Microdilution	NA	>64	1	1	<=0.03	>128	8	<=2	<=1	<=0.5	>32	>1024	<=8	4	<=0.25	8	0.25	0.06	0.12	<=0.03	4	<=0.12	<=0.015	1	2	NA	blaTEM-52	NA	NA	NA
16-AB02686	2016	BfR	Germany	Germany	Livestock	Broiler_chickens	Faeces/manure	NA	0	NA	NA	Microdilution	NA	>64	1	2	<=0.03	>128	>8	>64	<=1	1	>32	>1024	<=8	64	0.5	8	0.25	0.06	0.12	<=0.03	4	<=0.12	<=0.015	1	1	NA	blaTEM-52	NA	NA	NA
16-AB02687	2016	BfR	Germany	Germany	Livestock	Broiler_chickens	Faeces/manure	NA	0	NA	NA	Microdilution	NA	>64	8	2	<=0.03	>128	1	<=2	<=1	<=0.5	<=0.25	16	<=8	4	<=0.25	4	16	0.12	0.25	<=0.03	8	0.25	<=0.015	64	2	blaCTX-M-1	NA	NA	NA	NA
16-AB02693	2016	BfR	Germany	Germany	Livestock	Broiler_chickens	Other	Sample taken from the caecum	0	NA	NA	Microdilution	NA	>64	8	8	<=0.03	>128	>8	>64	<=1	<=0.5	0.5	>1024	16	16	0.5	16	32	0.12	0.25	<=0.03	16	<=0.12	<=0.015	64	16	blaCTX-M-1	NA	NA	NA	NA
16-AB02694	2016	BfR	Germany	Germany	Livestock	Turkeys	Meat	NA	0	NA	NA	Microdilution	NA	>64	4	2	<=0.03	8	0.25	<=2	<=1	<=0.5	<=0.25	16	32	4	<=0.25	4	0.5	0.06	0.12	<=0.03	4	<=0.12	<=0.015	4	4	NA	blaTEM-52	NA	NA	NA
16-AB02695	2016	BfR	Germany	Germany	Livestock	Broiler_chickens	Meat	NA	0	NA	NA	Microdilution	NA	>64	8	1	<=0.03	>128	8	>64	<=1	<=0.5	>32	>1024	>128	8	<=0.25	4	64	0.06	0.25	<=0.03	4	0.25	<=0.015	64	2	blaCTX-M-1	NA	NA	NA	NA
16-AB02696	2016	BfR	Germany	Germany	Livestock	Broiler_chickens	Meat	NA	0	NA	NA	Microdilution	NA	>64	2	2	<=0.03	>128	4	<=2	<=1	<=0.5	<=0.25	16	<=8	4	<=0.25	8	0.5	0.06	0.12	<=0.03	8	0.25	<=0.015	2	2	NA	blaTEM-52	NA	NA	NA
16-AB02711	2016	BfR	Germany	Germany	Livestock	Turkeys	Meat	NA	0	NA	NA	Microdilution	NA	>64	8	1	<=0.03	>128	0.25	<=2	<=1	<=0.5	>32	16	<=8	8	0.5	8	4	0.12	0.5	<=0.03	8	0.5	<=0.015	16	1	blaCTX-M-1	NA	NA	NA	NA
16-AB02725	2016	BfR	Germany	Germany	Livestock	Broiler_chickens	Faeces/manure	NA	0	NA	NA	Microdilution	NA	>32	8	1	<=0.03	<=4	<=0.015	<=2	<=1	<=0.5	0.5	<=8	<=8	8	<=0.25	4	4	0.06	0.12	<=0.03	4	<=0.12	<=0.015	16	1	blaCTX-M-1	NA	NA	NA	NA
16-AB02728	2016	BfR	Germany	Germany	Livestock	Turkeys	Other	Sample taken from the caecum	0	NA	NA	Microdilution	NA	>64	8	1	<=0.03	<=4	<=0.015	<=2	<=1	<=0.5	<=0.25	<=8	<=8	4	<=0.25	8	4	0.06	0.12	<=0.03	8	0.25	<=0.015	16	1	blaCTX-M-1	NA	NA	NA	NA
16-AB02737	2016	BfR	Germany	Germany	Livestock	Broiler_chickens	Faeces/manure	NA	0	NA	NA	Microdilution	NA	>64	2	2	<=0.03	>128	0.5	>64	<=1	<=0.5	>32	>1024	16	16	<=0.25	16	0.5	0.12	0.25	<=0.03	16	0.25	<=0.015	2	4	NA	blaTEM-52, blaTEM-106	NA	NA	NA
16-AB02744	2016	BfR	Germany	Germany	Livestock	Broiler_chickens	Meat	NA	0	NA	NA	Microdilution	NA	>64	8	8	<=0.03	8	0.25	64	<=1	<=0.5	<=0.25	>1024	<=8	4	<=0.25	4	4	0.06	0.12	<=0.03	16	<=0.12	<=0.015	16	16	NA	NA	blaSHV-12	NA	NA
16-AB02755	2016	BfR	Germany	Germany	Livestock	Broiler_chickens	Other	Sample taken from the caecum	0	NA	NA	Microdilution	NA	>64	8	8	<=0.03	128	4	<=2	<=1	<=0.5	<=0.25	16	<=8	4	<=0.25	64	0.25	4	8	<=0.03	8	0.25	0.06	8	8	NA	NA	NA	blaCMY-2	NA
16-AB02756	2016	BfR	Germany	Germany	Livestock	Broiler_chickens	Faeces/manure	NA	0	NA	NA	Microdilution	NA	>64	8	2	<=0.03	16	0.5	64	<=1	<=0.5	<=0.25	>1024	<=8	8	<=0.25	4	8	0.06	0.12	<=0.03	8	0.25	<=0.015	32	2	blaCTX-M-1	NA	NA	NA	NA
16-AB02757	2016	BfR	Germany	Germany	Livestock	Broiler_chickens	Other	Sample taken from the caecum	0	NA	NA	Microdilution	NA	>64	8	0.5	<=0.03	<=4	<=0.015	<=2	<=1	<=0.5	<=0.25	<=8	<=8	8	<=0.25	4	8	0.06	0.12	<=0.03	4	<=0.12	<=0.015	32	0.5	blaCTX-M-1	NA	NA	NA	NA
16-AB02759	2016	BfR	Germany	Germany	Livestock	Broiler_chickens	Other	Sample taken from the caecum	0	NA	NA	Microdilution	NA	>64	8	2	<=0.03	128	0.25	<=2	<=1	<=0.5	<=0.25	>1024	<=8	4	<=0.25	8	8	0.12	0.25	<=0.03	8	<=0.12	<=0.015	32	2	blaCTX-M-1	NA	NA	NA	NA
16-AB02760	2016	BfR	Germany	Germany	Livestock	Broiler_chickens	Faeces/manure	NA	0	NA	NA	Microdilution	NA	>64	8	1	<=0.03	>128	>8	64	<=1	<=0.5	>32	>1024	<=8	8	<=0.25	8	4	0.06	0.12	<=0.03	4	<=0.12	<=0.015	32	1	blaCTX-M-1	NA	NA	NA	NA
16-AB02761	2016	BfR	Germany	Germany	Livestock	Broiler_chickens	Faeces/manure	NA	0	NA	NA	Microdilution	NA	>64	8	16	<=0.03	>128	>8	>64	<=1	<=0.5	0.5	>1024	16	16	0.5	16	16	0.12	0.25	<=0.03	8	<=0.12	0.03	64	16	blaCTX-M-15	NA	NA	NA	NA
16-AB02762	2016	BfR	Germany	Germany	Livestock	Broiler_chickens	Faeces/manure	NA	0	NA	NA	Microdilution	NA	>64	8	0.5	<=0.03	<=4	<=0.015	<=2	<=1	<=0.5	>32	>1024	<=8	4	<=0.25	4	4	0.06	0.12	<=0.03	4	<=0.12	<=0.015	16	0.5	blaCTX-M-1	NA	NA	NA	NA
16-AB02768	2016	BfR	Germany	Germany	Livestock	Broiler_chickens	Meat	NA	0	NA	NA	Microdilution	NA	>64	4	16	<=0.03	>128	4	>64	<=1	<=0.5	0.5	16	<=8	16	0.5	16	1	0.06	0.25	<=0.03	8	<=0.12	<=0.015	4	16	NA	NA	blaSHV-12	NA	NA
16-AB02770	2016	BfR	Germany	Germany	Livestock	Turkeys	Meat	NA	0	NA	NA	Microdilution	NA	>64	8	1	<=0.03	>128	>8	64	<=1	<=0.5	<=0.25	>1024	128	4	<=0.25	8	2	0.12	0.25	<=0.03	8	<=0.12	<=0.015	64	1	blaCTX-M-1	NA	NA	NA	NA
16-AB02771	2016	BfR	Germany	Germany	Livestock	Broiler_chickens	Other	Sample taken from the caecum	0	NA	NA	Microdilution	NA	>64	8	16	<=0.03	<=4	0.03	>64	<=1	32	<=0.25	>1024	<=8	4	<=0.25	128	0.5	16	16	0.06	16	0.25	0.12	32	16	NA	NA	NA	blaCMY-2	NA
16-AB02772	2016	BfR	Germany	Germany	Livestock	Broiler_chickens	Other	Sample taken from the caecum	0	NA	NA	Microdilution	NA	>64	8	4	<=0.03	128	0.25	<=2	<=1	8	>32	>1024	<=8	4	<=0.25	4	1	0.06	0.12	<=0.03	4	<=0.12	<=0.015	8	8	NA	blaTEM-52	NA	NA	NA
16-AB02773	2016	BfR	Germany	Germany	Livestock	Broiler_chickens	Other	Sample taken from the caecum	0	NA	NA	Microdilution	NA	>64	8	16	<=0.03	<=4	<=0.015	<=2	<=1	<=0.5	<=0.25	<=8	<=8	8	<=0.25	64	0.25	8	4	<=0.03	8	<=0.12	0.03	8	8	NA	NA	NA	blaCMY-2	NA
16-AB02774	2016	BfR	Germany	Germany	Livestock	Broiler_chickens	Other	Sample taken from the caecum	0	NA	NA	Microdilution	NA	>64	8	8	<=0.03	<=4	<=0.015	>64	<=1	>32	<=0.25	>1024	<=8	8	<=0.25	64	0.25	4	4	<=0.03	8	<=0.12	0.03	8	8	NA	NA	NA	blaCMY-2	NA
16-AB02775	2016	BfR	Germany	Germany	Livestock	Broiler_chickens	Other	Sample taken from the caecum	0	NA	NA	Microdilution	NA	>64	8	2	<=0.03	<=4	<=0.015	<=2	<=1	<=0.5	>32	>1024	<=8	8	<=0.25	4	8	0.06	0.25	<=0.03	8	0.25	<=0.015	64	2	blaCTX-M-1	NA	NA	NA	NA
16-AB02776	2016	BfR	Germany	Germany	Livestock	Broiler_chickens	Other	Sample taken from the caecum	0	NA	NA	Microdilution	NA	>64	8	16	<=0.03	<=4	<=0.015	64	<=1	<=0.5	<=0.25	<=8	<=8	8	<=0.25	8	1	0.12	0.25	<=0.03	8	0.25	<=0.015	4	16	NA	NA	blaSHV-12	NA	NA
16-AB02777	2016	BfR	Germany	Germany	Livestock	Broiler_chickens	Other	Sample taken from the caecum	0	NA	NA	Microdilution	NA	>64	8	8	<=0.03	>128	8	>64	<=1	16	>32	>1024	<=8	8	<=0.25	32	0.12	4	2	<=0.03	4	0.25	<=0.015	8	8	NA	NA	NA	blaCMY-2	NA
16-AB02778	2016	BfR	Germany	Germany	Livestock	Broiler_chickens	Other	Sample taken from the caecum	0	NA	NA	Microdilution	NA	>64	8	8	<=0.03	>128	4	4	<=1	1	<=0.25	>1024	<=8	16	<=0.25	4	1	0.06	0.12	0.06	4	0.25	<=0.015	4	16	NA	NA	blaSHV-12	NA	NA
16-AB02779	2016	BfR	Germany	Germany	Livestock	Broiler_chickens	Other	Sample taken from the caecum	0	NA	NA	Microdilution	NA	>64	4	16	<=0.03	>128	2	<=2	<=1	<=0.5	<=0.25	>1024	<=8	16	<=0.25	4	0.5	0.06	0.12	<=0.03	4	0.25	<=0.015	8	32	NA	NA	blaSHV-12	NA	NA
16-AB02780	2016	BfR	Germany	Germany	Livestock	Broiler_chickens	Other	Sample taken from the caecum	0	NA	NA	Microdilution	NA	>64	4	16	<=0.03	>128	4	4	<=1	<=0.5	<=0.25	>1024	<=8	16	<=0.25	4	0.5	0.06	0.12	<=0.03	4	<=0.12	<=0.015	4	16	NA	NA	blaSHV-12	NA	NA
16-AB02781	2016	BfR	Germany	Germany	Livestock	Broiler_chickens	Other	Sample taken from the caecum	0	NA	NA	Microdilution	NA	>64	4	8	<=0.03	<=4	0.06	4	2	1	<=0.25	<=8	16	16	0.5	8	1	0.12	0.5	<=0.03	32	0.5	<=0.015	4	8	NA	blaTEM-52	NA	NA	NA
16-AB02782	2016	BfR	Germany	Germany	Livestock	Broiler_chickens	Other	Sample taken from the caecum	0	NA	NA	Microdilution	NA	>64	8	16	<=0.03	<=4	<=0.015	>64	<=1	32	<=0.25	>1024	<=8	8	<=0.25	64	0.25	8	8	<=0.03	8	<=0.12	0.03	8	8	NA	NA	NA	blaCMY-2	NA
16-AB02783	2016	BfR	Germany	Germany	Livestock	Broiler_chickens	Other	Sample taken from the caecum	0	NA	NA	Microdilution	NA	>64	8	8	<=0.03	<=4	<=0.015	>64	<=1	16	<=0.25	>1024	<=8	4	<=0.25	64	0.25	8	4	<=0.03	8	<=0.12	0.06	8	8	NA	NA	NA	blaCMY-2	NA
16-AB02784	2016	BfR	Germany	Germany	Livestock	Broiler_chickens	Other	Sample taken from the caecum	0	NA	NA	Microdilution	NA	>64	8	0.5	0.06	<=4	<=0.015	>64	<=1	1	>32	>1024	<=8	64	<=0.25	4	4	0.06	0.12	<=0.03	4	0.25	<=0.015	16	1	blaCTX-M-1, blaCTX-M-14	NA	NA	NA	NA
16-AB02789	2016	BfR	Germany	Germany	Livestock	Broiler_chickens	Meat	NA	0	NA	NA	Microdilution	NA	>64	8	8	<=0.03	<=4	0.03	<=2	<=1	<=0.5	<=0.25	16	<=8	4	<=0.25	8	1	0.12	0.12	<=0.03	16	0.5	<=0.015	4	8	NA	blaTEM-52	NA	NA	NA
16-AB02791	2016	BfR	Germany	Germany	Livestock	Broiler_chickens	Meat	NA	0	NA	NA	Microdilution	NA	>64	2	8	<=0.03	<=4	0.25	64	<=1	<=0.5	<=0.25	<=8	<=8	8	0.5	4	0.25	0.06	0.12	<=0.03	4	<=0.12	<=0.015	4	8	NA	NA	blaSHV-12	NA	NA
16-AB02794	2016	BfR	Germany	Germany	Livestock	Broiler_chickens	Meat	NA	0	NA	NA	Microdilution	NA	>64	8	0.5	<=0.03	>128	8	64	4	8	>32	>1024	32	8	<=0.25	4	2	0.06	0.12	<=0.03	4	<=0.12	<=0.015	32	1	blaCTX-M-1	NA	NA	NA	NA
16-AB02795	2016	BfR	Germany	Germany	Livestock	Broiler_chickens	Meat	NA	0	NA	NA	Microdilution	NA	>64	8	8	<=0.03	<=4	<=0.015	>64	<=1	<=0.5	0.5	16	<=8	8	<=0.25	64	0.25	8	4	<=0.03	4	<=0.12	0.03	8	8	NA	NA	NA	blaCMY-2	NA
16-AB02796	2016	BfR	Germany	Germany	Livestock	Turkeys	Meat	NA	0	NA	NA	Microdilution	NA	>64	4	16	<=0.03	<=4	<=0.015	64	<=1	<=0.5	<=0.25	>1024	32	4	<=0.25	4	0.5	0.06	0.12	<=0.03	8	<=0.12	<=0.015	4	16	NA	NA	blaSHV-12	NA	NA
16-AB02808	2016	BfR	Germany	Germany	Livestock	Broiler_chickens	Other	Sample taken from the caecum	0	NA	NA	Microdilution	NA	>64	4	8	<=0.03	8	0.5	<=2	<=1	<=0.5	<=0.25	<=8	<=8	8	<=0.25	4	0.25	0.06	0.12	<=0.03	4	<=0.12	<=0.015	4	8	NA	NA	blaSHV-12	NA	NA
16-AB02811	2016	BfR	Germany	Germany	Livestock	Turkeys	Meat	NA	0	NA	NA	Microdilution	NA	>64	8	0.5	<=0.03	>128	4	32	<=1	>32	<=0.25	>1024	<=8	8	<=0.25	4	8	0.06	0.12	<=0.03	4	<=0.12	<=0.015	32	0.5	blaCTX-M-1	NA	NA	NA	NA
16-AB02812	2016	BfR	Germany	Germany	Livestock	Broiler_chickens	Meat	NA	0	NA	NA	Microdilution	NA	>64	8	8	<=0.03	<=4	<=0.015	64	<=1	16	<=0.25	>1024	<=8	4	<=0.25	64	0.5	8	8	0.06	8	0.25	0.06	8	16	NA	NA	NA	blaCMY-2	NA
16-AB02817	2016	BfR	Germany	Germany	Livestock	Broiler_chickens	Faeces/manure	NA	0	NA	NA	Microdilution	NA	>64	8	2	<=0.03	<=4	<=0.015	<=2	<=1	<=0.5	0.5	<=8	<=8	4	<=0.25	4	64	0.06	0.25	<=0.03	4	<=0.12	0.03	128	2	blaCTX-M-1	NA	NA	NA	NA
16-AB02829	2016	BfR	Germany	Germany	Livestock	Turkeys	Meat	NA	0	NA	NA	Microdilution	NA	>64	8	16	<=0.03	>128	>8	>64	<=1	<=0.5	>32	>1024	<=8	8	<=0.25	8	8	0.12	0.25	<=0.03	16	<=0.12	<=0.015	64	16	blaCTX-M-1	NA	NA	NA	NA
16-AB02830	2016	BfR	Germany	Germany	Livestock	Broiler_chickens	Meat	NA	0	NA	NA	Microdilution	NA	>64	8	16	<=0.03	<=4	0.03	<=2	<=1	1	<=0.25	<=8	<=8	4	<=0.25	128	0.5	16	8	<=0.03	16	0.25	0.12	32	16	NA	NA	NA	blaCMY-2	NA
16-AB02831	2016	BfR	Germany	Germany	Livestock	Turkeys	Meat	NA	0	NA	NA	Microdilution	NA	>64	8	8	<=0.03	8	0.5	>64	<=1	1	0.5	16	<=8	<=2	<=0.25	64	0.25	4	8	<=0.03	8	0.25	0.06	8	8	NA	NA	NA	blaCMY-2	NA
16-AB02832	2016	BfR	Germany	Germany	Livestock	Broiler_chickens	Meat	NA	0	NA	NA	Microdilution	NA	>64	8	1	<=0.03	64	0.25	>64	<=1	1	>32	>1024	<=8	8	<=0.25	8	16	0.06	0.12	<=0.03	8	<=0.12	<=0.015	32	2	blaCTX-M-1	NA	NA	NA	NA
16-AB02849	2016	BfR	Germany	Germany	Livestock	Broiler_chickens	Meat	NA	0	NA	NA	Microdilution	NA	>64	8	2	<=0.03	>128	>8	64	<=1	<=0.5	>32	>1024	32	8	<=0.25	8	8	0.06	0.25	<=0.03	8	0.25	<=0.015	64	2	blaCTX-M-1	NA	NA	NA	NA
16-AB02850	2016	BfR	Germany	Germany	Livestock	Broiler_chickens	Meat	NA	0	NA	NA	Microdilution	NA	>64	8	16	<=0.03	128	0.25	>64	<=1	<=0.5	1	<=8	<=8	8	<=0.25	4	2	0.06	0.12	<=0.03	4	<=0.12	<=0.015	8	64	NA	NA	blaSHV-12	NA	NA
16-AB02851	2016	BfR	Germany	Germany	Livestock	Broiler_chickens	Meat	NA	0	NA	NA	Microdilution	NA	>64	8	16	<=0.03	>128	>8	>64	<=1	<=0.5	1	>1024	<=8	16	0.5	16	8	0.12	0.25	<=0.03	8	<=0.12	<=0.015	64	16	blaCTX-M-15	NA	NA	NA	NA
16-AB02854	2016	BfR	Germany	Germany	Livestock	Turkeys	Meat	NA	0	NA	NA	Microdilution	NA	>64	8	1	<=0.03	<=4	<=0.015	<=2	<=1	<=0.5	<=0.25	16	<=8	8	<=0.25	4	8	0.06	0.12	<=0.03	4	0.25	<=0.015	32	1	blaCTX-M-1	NA	NA	NA	NA
16-AB02855	2016	BfR	Germany	Germany	Livestock	Turkeys	Meat	NA	0	NA	NA	Microdilution	NA	>64	8	0.5	<=0.03	<=4	<=0.015	<=2	<=1	<=0.5	>32	>1024	<=8	4	<=0.25	4	8	0.06	0.12	<=0.03	4	0.25	<=0.015	32	1	blaCTX-M-1	NA	NA	NA	NA
16-AB02857	2016	BfR	Germany	Germany	Livestock	Broiler_chickens	Faeces/manure	NA	0	NA	NA	Microdilution	NA	>64	8	2	<=0.03	<=4	<=0.015	<=2	<=1	<=0.5	0.5	16	<=8	4	<=0.25	4	8	0.06	0.25	<=0.03	8	<=0.12	<=0.015	32	2	blaCTX-M-1	NA	NA	NA	NA
16-AB02867	2016	BfR	Germany	Germany	Livestock	Broiler_chickens	Meat	NA	0	NA	NA	Microdilution	NA	>64	8	1	<=0.03	<=4	<=0.015	32	<=1	4	0.5	>1024	<=8	4	0.5	4	16	0.06	0.12	<=0.03	8	0.5	<=0.015	32	1	blaCTX-M-1	NA	NA	NA	NA
16-AB02868	2016	BfR	Germany	Germany	Livestock	Turkeys	Meat	NA	0	NA	NA	Microdilution	NA	>64	8	2	<=0.03	64	0.25	64	<=1	1	>32	>1024	>128	8	<=0.25	4	16	0.06	0.12	<=0.03	4	<=0.12	<=0.015	64	1	blaCTX-M-1	NA	NA	NA	NA
16-AB02880	2016	BfR	Germany	Germany	Livestock	Turkeys	Meat	NA	0	NA	NA	Microdilution	NA	>64	8	4	<=0.03	<=4	0.03	<=2	<=1	4	<=0.25	16	<=8	8	<=0.25	16	64	0.12	0.5	<=0.03	8	0.25	0.12	128	4	blaCTX-M-1	NA	NA	NA	NA
16-AB02881	2016	BfR	Germany	Germany	Livestock	Turkeys	Meat	NA	0	NA	NA	Microdilution	NA	>64	8	1	<=0.03	>128	>8	<=2	<=1	<=0.5	<=0.25	<=8	<=8	4	<=0.25	4	4	0.06	0.12	<=0.03	4	0.25	<=0.015	32	1	blaCTX-M-1	NA	NA	NA	NA
16-AB02882	2016	BfR	Germany	Germany	Livestock	Turkeys	Meat	NA	0	NA	NA	Microdilution	NA	>64	8	0.5	<=0.03	>128	0.25	<=2	<=1	2	<=0.25	16	32	4	<=0.25	4	4	0.06	0.12	<=0.03	4	0.25	<=0.015	64	0.5	blaCTX-M-1	NA	NA	NA	NA
16-AB02883	2016	BfR	Germany	Germany	Livestock	Broiler_chickens	Meat	NA	0	NA	NA	Microdilution	NA	>64	8	0.5	<=0.03	<=4	0.03	64	<=1	<=0.5	<=0.25	>1024	<=8	4	<=0.25	4	4	0.06	0.12	<=0.03	4	0.25	<=0.015	32	0.5	blaCTX-M-1	NA	NA	NA	NA
16-AB02884	2016	BfR	Germany	Germany	Livestock	Broiler_chickens	Meat	NA	0	NA	NA	Microdilution	NA	>64	4	16	<=0.03	8	0.5	<=2	<=1	<=0.5	<=0.25	>1024	<=8	8	<=0.25	8	1	0.12	0.12	<=0.03	8	<=0.12	<=0.015	4	16	NA	NA	blaSHV-12	NA	NA
16-AB02885	2016	BfR	Germany	Germany	Livestock	Broiler_chickens	Meat	NA	0	NA	NA	Microdilution	NA	>64	8	1	<=0.03	16	0.5	64	<=1	>32	>32	>1024	128	4	<=0.25	4	16	0.06	0.25	<=0.03	8	0.25	<=0.015	64	1	blaCTX-M-1	NA	NA	NA	NA
16-AB02886	2016	BfR	Germany	Germany	Livestock	Broiler_chickens	Meat	NA	0	NA	NA	Microdilution	NA	>64	8	16	<=0.03	<=4	0.03	>64	<=1	>32	>32	>1024	<=8	4	<=0.25	128	0.5	16	8	0.06	8	0.5	0.06	16	16	NA	NA	NA	blaCMY-2	NA
16-AB02887	2016	BfR	Germany	Germany	Livestock	Turkeys	Meat	NA	0	NA	NA	Microdilution	NA	>64	8	1	<=0.03	<=4	<=0.015	<=2	4	1	<=0.25	16	<=8	<=2	<=0.25	8	8	0.06	0.12	<=0.03	4	<=0.12	0.03	32	1	blaCTX-M-1	NA	NA	NA	NA
16-AB02888	2016	BfR	Germany	Germany	Livestock	Broiler_chickens	Meat	NA	0	NA	NA	Microdilution	NA	>64	4	8	<=0.03	>128	>8	>64	<=1	1	>32	>1024	<=8	8	<=0.25	2	0.25	0.06	0.12	<=0.03	4	<=0.12	<=0.015	4	8	NA	NA	blaSHV-12	NA	NA
16-AB02889	2016	BfR	Germany	Germany	Livestock	Turkeys	Meat	NA	0	NA	NA	Microdilution	NA	>64	8	16	<=0.03	<=4	0.25	4	<=1	<=0.5	0.5	16	<=8	8	<=0.25	32	64	0.12	0.25	<=0.03	16	<=0.12	0.06	128	32	blaCTX-M-15	NA	NA	NA	NA
16-AB02908	2016	BfR	Germany	Germany	Livestock	Turkeys	Meat	NA	0	NA	NA	Microdilution	NA	>64	8	16	<=0.03	<=4	0.03	<=2	<=1	<=0.5	<=0.25	>1024	128	4	<=0.25	64	0.25	4	4	0.06	8	0.5	0.06	8	8	NA	NA	NA	blaCMY-2	NA
16-AB02923	2016	BfR	Germany	Germany	Livestock	Turkeys	Other	Sample taken from the caecum	0	NA	NA	Microdilution	NA	>64	8	4	<=0.03	<=4	0.25	4	<=1	<=0.5	<=0.25	<=8	<=8	4	<=0.25	4	16	0.06	0.12	<=0.03	4	<=0.12	<=0.015	64	4	blaCTX-M-15	NA	NA	NA	NA
16-AB02928	2016	BfR	Germany	Germany	Livestock	Broiler_chickens	Faeces/manure	NA	0	NA	NA	Microdilution	NA	>64	8	8	<=0.03	<=4	<=0.015	64	<=1	>32	<=0.25	>1024	<=8	4	<=0.25	64	0.12	4	4	<=0.03	4	0.25	<=0.015	8	4	NA	NA	NA	blaCMY-2	NA
16-AB02932	2016	BfR	Germany	Germany	Livestock	Broiler_chickens	Other	Sample taken from the caecum	0	NA	NA	Microdilution	NA	>64	4	8	<=0.03	128	0.5	<=2	<=1	>32	<=0.25	<=8	<=8	16	<=0.25	16	0.25	4	2	<=0.03	16	0.25	<=0.015	4	8	NA	NA	NA	blaCMY-2	NA
16-AB02934	2016	BfR	Germany	Germany	Livestock	Broiler_chickens	Other	Sample taken from the caecum	0	NA	NA	Microdilution	NA	>64	8	16	<=0.03	>128	>8	>64	<=1	<=0.5	>32	>1024	128	8	<=0.25	8	64	0.06	0.25	<=0.03	8	0.25	0.03	128	16	blaCTX-M-15	NA	NA	NA	NA
16-AB02936	2016	BfR	Germany	Germany	Livestock	Broiler_chickens	Meat	NA	0	NA	NA	Microdilution	NA	>64	2	1	<=0.03	<=4	<=0.015	<=2	<=1	<=0.5	0.5	16	<=8	8	<=0.25	8	0.25	0.06	0.12	<=0.03	8	0.25	<=0.015	2	2	NA	blaTEM-52	NA	NA	NA
16-AB02937	2016	BfR	Germany	Germany	Livestock	Broiler_chickens	Meat	NA	0	NA	NA	Microdilution	NA	>64	4	16	<=0.03	128	2	<=2	<=1	<=0.5	<=0.25	<=8	<=8	8	<=0.25	8	0.5	0.06	0.25	<=0.03	4	0.5	<=0.015	4	16	NA	NA	blaSHV-12	NA	NA
16-AB02939	2016	BfR	Germany	Germany	Livestock	Broiler_chickens	Faeces/manure	NA	0	NA	NA	Microdilution	NA	>64	8	16	<=0.03	>128	0.25	64	<=1	<=0.5	>32	>1024	<=8	8	<=0.25	64	0.25	8	8	<=0.03	16	<=0.12	<=0.015	8	16	NA	NA	NA	blaCMY-2	NA
16-AB02942	2016	BfR	Germany	Germany	Livestock	Broiler_chickens	Faeces/manure	NA	0	NA	NA	Microdilution	NA	>64	8	1	<=0.03	>128	8	64	<=1	<=0.5	>32	>1024	<=8	8	<=0.25	4	16	0.06	0.12	<=0.03	4	<=0.12	<=0.015	32	1	blaCTX-M-1	NA	NA	NA	NA
16-AB02945	2016	BfR	Germany	Germany	Livestock	Broiler_chickens	Faeces/manure	NA	0	NA	NA	Microdilution	NA	>64	8	1	<=0.03	128	0.25	>64	<=1	1	<=0.25	>1024	<=8	4	<=0.25	8	4	0.06	0.12	<=0.03	8	0.25	<=0.015	32	1	blaCTX-M-1	NA	NA	NA	NA
16-AB02950	2016	BfR	Germany	Germany	Livestock	Broiler_chickens	Faeces/manure	NA	0	NA	NA	Microdilution	NA	>64	8	1	<=0.03	<=4	0.03	>64	16	<=0.5	>32	>1024	<=8	8	1	8	16	0.06	0.25	<=0.03	8	<=0.12	<=0.015	64	2	blaCTX-M-1	NA	NA	NA	NA
16-AB02957	2016	BfR	Germany	Germany	Livestock	Broiler_chickens	Faeces/manure	NA	0	NA	NA	Microdilution	NA	>64	1	1	<=0.03	<=4	<=0.015	64	<=1	<=0.5	>32	>1024	<=8	4	<=0.25	4	0.25	0.06	0.25	<=0.03	8	0.25	<=0.015	1	2	NA	blaTEM-20, blaTEM-52	NA	NA	NA
16-AB02960	2016	BfR	Germany	Germany	Livestock	Broiler_chickens	Faeces/manure	NA	0	NA	NA	Microdilution	NA	>64	8	0.5	<=0.03	<=4	<=0.015	64	<=1	2	<=0.25	>1024	<=8	4	<=0.25	8	64	0.06	0.12	<=0.03	8	0.25	<=0.015	32	0.5	blaCTX-M-15	NA	NA	NA	NA
16-AB02963	2016	BfR	Germany	Germany	Livestock	Broiler_chickens	Faeces/manure	NA	0	NA	NA	Microdilution	NA	>64	8	16	<=0.03	>128	>8	>64	<=1	<=0.5	0.5	>1024	<=8	16	0.5	16	32	0.12	0.25	<=0.03	16	<=0.12	<=0.015	128	8	blaCTX-M-1	NA	NA	NA	NA
16-AB02968	2016	BfR	Germany	Germany	Livestock	Broiler_chickens	Faeces/manure	NA	0	NA	NA	Microdilution	NA	>64	4	4	<=0.03	>128	1	<=2	<=1	<=0.5	>32	<=8	16	8	<=0.25	2	0.5	0.06	0.12	<=0.03	8	<=0.12	<=0.015	2	4	NA	blaTEM-52	NA	NA	NA
16-AB02973	2016	BfR	Germany	Germany	Livestock	Broiler_chickens	Faeces/manure	NA	0	NA	NA	Microdilution	NA	>64	8	16	<=0.03	8	0.5	>64	<=1	<=0.5	>32	>1024	<=8	8	<=0.25	8	0.5	0.06	0.12	<=0.03	8	<=0.12	<=0.015	8	16	NA	NA	blaSHV-12	NA	NA
16-AB02976	2016	BfR	Germany	Germany	Livestock	Broiler_chickens	Faeces/manure	NA	0	NA	NA	Microdilution	NA	>64	8	2	<=0.03	>128	>8	>64	4	1	>32	>1024	>128	8	<=0.25	4	16	0.06	0.12	<=0.03	8	0.5	<=0.015	32	2	blaCTX-M-1	NA	NA	NA	NA
16-AB02978	2016	BfR	Germany	Germany	Livestock	Broiler_chickens	Faeces/manure	NA	0	NA	NA	Microdilution	NA	>64	8	16	<=0.03	<=4	0.03	64	<=1	32	<=0.25	>1024	<=8	8	0.5	64	0.25	8	8	<=0.03	8	0.25	0.03	16	16	NA	NA	NA	blaCMY-2	NA
16-AB02980	2016	BfR	Germany	Germany	Livestock	Broiler_chickens	Faeces/manure	NA	0	NA	NA	Microdilution	NA	>64	8	16	<=0.03	>128	>8	>64	<=1	<=0.5	<=0.25	<=8	<=8	8	<=0.25	128	0.5	16	16	<=0.03	16	0.5	0.06	16	32	NA	NA	NA	blaCMY-2	NA
16-AB02982	2016	BfR	Germany	Germany	Livestock	Broiler_chickens	Faeces/manure	NA	0	NA	NA	Microdilution	NA	>64	8	0.5	<=0.03	>128	4	<=2	<=1	<=0.5	<=0.25	>1024	<=8	4	<=0.25	1	4	0.06	0.12	<=0.03	0.5	0.5	<=0.015	4	0.25	blaCTX-M-1	NA	NA	NA	NA
16-AB02984	2016	BfR	Germany	Germany	Livestock	Broiler_chickens	Faeces/manure	NA	0	NA	NA	Microdilution	NA	>64	4	16	<=0.03	16	0.5	<=2	<=1	<=0.5	0.5	16	<=8	16	<=0.25	4	0.25	0.12	0.25	<=0.03	8	<=0.12	<=0.015	4	16	NA	NA	blaSHV-12	NA	NA
16-AB02989	2016	BfR	Germany	Germany	Livestock	Broiler_chickens	Faeces/manure	NA	0	NA	NA	Microdilution	NA	>64	8	16	<=0.03	<=4	<=0.015	64	<=1	32	<=0.25	>1024	<=8	4	<=0.25	64	0.25	8	8	<=0.03	8	0.25	0.03	8	8	NA	NA	NA	blaCMY-2	NA
16-AB02991	2016	BfR	Germany	Germany	Livestock	Broiler_chickens	Faeces/manure	NA	0	NA	NA	Microdilution	NA	>64	2	16	<=0.03	<=4	<=0.015	>64	<=1	<=0.5	>32	>1024	<=8	8	<=0.25	8	0.5	0.06	0.12	<=0.03	8	<=0.12	<=0.015	2	16	NA	NA	blaSHV-12	NA	NA
16-AB02993	2016	BfR	Germany	Germany	Livestock	Broiler_chickens	Faeces/manure	NA	0	NA	NA	Microdilution	NA	>64	8	2	<=0.03	>128	0.25	>64	<=1	<=0.5	>32	>1024	16	8	0.5	4	8	0.06	0.12	<=0.03	4	0.25	<=0.015	16	4	blaCTX-M-1	NA	NA	NA	NA
16-AB02995	2016	BfR	Germany	Germany	Livestock	Broiler_chickens	Faeces/manure	NA	0	NA	NA	Microdilution	NA	>64	8	8	<=0.03	<=4	0.03	<=2	<=1	<=0.5	0.5	<=8	<=8	8	<=0.25	64	0.25	8	4	<=0.03	8	<=0.12	0.03	8	8	NA	NA	NA	blaCMY-2	NA
16-AB03004	2016	BfR	Germany	Germany	Livestock	Broiler_chickens	Faeces/manure	NA	0	NA	NA	Microdilution	NA	>64	8	2	<=0.03	<=4	<=0.015	<=2	<=1	<=0.5	<=0.25	<=8	<=8	8	<=0.25	4	8	0.06	0.25	<=0.03	4	<=0.12	<=0.015	32	1	NA	NA	NA	blaCMY-2	NA
16-AB03006	2016	BfR	Germany	Germany	Livestock	Broiler_chickens	Faeces/manure	NA	0	NA	NA	Microdilution	NA	>64	8	2	<=0.03	<=4	<=0.015	<=2	<=1	1	<=0.25	<=8	<=8	4	<=0.25	4	8	0.06	0.25	<=0.03	4	<=0.12	<=0.015	32	1	blaCTX-M-1	NA	NA	NA	NA
16-AB03012	2016	BfR	Germany	Germany	Livestock	Broiler_chickens	Faeces/manure	NA	0	NA	NA	Microdilution	NA	>64	8	2	<=0.03	<=4	<=0.015	<=2	<=1	1	0.5	16	<=8	8	<=0.25	4	32	0.12	0.5	<=0.03	8	0.25	<=0.015	64	2	blaCTX-M-1	NA	NA	NA	NA
16-AB03015	2016	BfR	Germany	Germany	Livestock	Broiler_chickens	Faeces/manure	NA	0	NA	NA	Microdilution	NA	>64	8	16	<=0.03	>128	1	64	<=1	<=0.5	<=0.25	>1024	64	<=2	<=0.25	16	2	0.12	0.12	<=0.03	8	<=0.12	<=0.015	8	32	NA	NA	blaSHV-12	NA	NA
16-AB03037	2016	BfR	Germany	Germany	Livestock	Broiler_chickens	Other	Sample taken from the caecum	0	NA	NA	Microdilution	NA	>64	8	16	<=0.03	>128	2	4	<=1	<=0.5	<=0.25	>1024	<=8	16	<=0.25	4	0.5	0.06	0.12	<=0.03	4	<=0.12	<=0.015	4	16	NA	NA	blaSHV-12	NA	NA
16-AB03043	2016	BfR	Germany	Germany	Livestock	Broiler_chickens	Other	Sample taken from the caecum	0	NA	NA	Microdilution	NA	>64	8	16	<=0.03	16	0.5	>64	<=1	<=0.5	>32	>1024	16	16	0.5	4	0.5	0.06	0.25	<=0.03	8	<=0.12	0.03	8	32	NA	NA	blaSHV-12	NA	NA
16-AB03045	2016	BfR	Germany	Germany	Livestock	Broiler_chickens	Other	Sample taken from the caecum	0	NA	NA	Microdilution	NA	>64	8	16	<=0.03	>128	0.5	<=2	<=1	1	>32	16	<=8	8	<=0.25	8	4	0.06	0.12	<=0.03	8	<=0.12	<=0.015	16	32	NA	blaTEM-52	NA	NA	NA
16-AB03046	2016	BfR	Germany	Germany	Livestock	Broiler_chickens	Other	Sample taken from the caecum	0	NA	NA	Microdilution	NA	>64	4	16	<=0.03	16	0.5	>64	<=1	<=0.5	>32	>1024	16	8	0.5	8	1	0.06	0.25	<=0.03	16	0.25	<=0.015	8	64	NA	NA	blaSHV-12	NA	NA
16-AB03048	2016	BfR	Germany	Germany	Livestock	Broiler_chickens	Meat	NA	0	NA	NA	Microdilution	NA	>64	8	16	<=0.03	128	0.5	4	<=1	<=0.5	<=0.25	32	<=8	4	<=0.25	128	0.5	8	8	<=0.03	16	0.25	0.06	16	16	NA	NA	NA	blaCMY-2	NA
16-AB03058	2016	BfR	Germany	Germany	Livestock	Broiler_chickens	Other	Sample taken from the caecum	0	NA	NA	Microdilution	NA	>64	8	2	<=0.03	>128	0.25	64	<=1	<=0.5	<=0.25	>1024	<=8	<=2	<=0.25	4	16	0.06	0.12	<=0.03	4	0.25	<=0.015	64	2	blaCTX-M-1	NA	NA	NA	NA
16-AB03060	2016	BfR	Germany	Germany	Livestock	Broiler_chickens	Other	Sample taken from the caecum	0	NA	NA	Microdilution	NA	>64	8	1	<=0.03	>128	0.5	64	<=1	<=0.5	<=0.25	>1024	<=8	4	<=0.25	4	16	0.06	0.12	<=0.03	4	0.25	<=0.015	64	1	blaCTX-M-1	NA	NA	NA	NA
16-AB03063	2016	BfR	Germany	Germany	Livestock	Broiler_chickens	Other	Sample taken from the caecum	0	NA	NA	Microdilution	NA	>64	8	4	<=0.03	>128	>8	>64	<=1	<=0.5	>32	>1024	<=8	16	0.5	4	16	0.06	0.25	<=0.03	8	0.25	0.03	64	4	blaCTX-M-1	NA	NA	NA	NA
16-AB03066	2016	BfR	Germany	Germany	Livestock	Broiler_chickens	Other	Sample taken from the caecum	0	NA	NA	Microdilution	NA	>64	8	8	<=0.03	<=4	0.25	4	<=1	<=0.5	0.5	16	<=8	8	<=0.25	8	4	0.06	0.25	<=0.03	8	0.25	<=0.015	32	8	blaCTX-M-15	NA	NA	NA	NA
16-AB03068	2016	BfR	Germany	Germany	Livestock	Broiler_chickens	Other	Sample taken from the caecum	0	NA	NA	Microdilution	NA	>64	8	8	<=0.03	<=4	0.5	64	<=1	1	>32	>1024	<=8	<=2	<=0.25	4	32	0.06	0.12	<=0.03	4	0.25	<=0.015	64	8	blaCTX-M-15	NA	NA	NA	NA
16-AB03070	2016	BfR	Germany	Germany	Livestock	Broiler_chickens	Other	Sample taken from the caecum	0	NA	NA	Microdilution	NA	>64	4	16	<=0.03	8	0.5	64	<=1	<=0.5	>32	>1024	<=8	8	<=0.25	4	1	0.06	0.12	<=0.03	4	<=0.12	<=0.015	8	8	NA	NA	blaSHV-12	NA	NA
16-AB03072	2016	BfR	Germany	Germany	Livestock	Turkeys	Other	Sample taken from the caecum	0	NA	NA	Microdilution	NA	>64	8	4	<=0.03	8	0.25	<=2	<=1	<=0.5	<=0.25	16	<=8	<=2	<=0.25	8	2	0.06	0.12	<=0.03	4	<=0.12	<=0.015	4	4	NA	blaTEM-52	NA	NA	NA
16-AB03083	2016	BfR	Germany	Germany	Livestock	Turkeys	Meat	NA	0	NA	NA	Microdilution	NA	>64	8	1	<=0.03	>128	8	64	4	>32	>32	>1024	<=8	8	<=0.25	8	16	0.06	0.25	<=0.03	4	0.25	0.03	64	2	blaCTX-M-1	NA	NA	NA	NA
16-AB03087	2016	BfR	Germany	Germany	Livestock	Broiler_chickens	Meat	NA	0	NA	NA	Microdilution	NA	>64	8	2	<=0.03	<=4	<=0.015	>64	<=1	<=0.5	<=0.25	>1024	<=8	8	<=0.25	4	32	0.06	0.25	<=0.03	4	0.25	<=0.015	32	2	blaCTX-M-1	NA	NA	NA	NA
16-AB03088	2016	BfR	Germany	Germany	Livestock	Turkeys	Meat	NA	0	NA	NA	Microdilution	NA	>64	8	2	<=0.03	<=4	<=0.015	<=2	<=1	<=0.5	<=0.25	<=8	<=8	4	<=0.25	4	64	0.06	0.12	<=0.03	8	<=0.12	<=0.015	64	1	blaCTX-M-1	NA	NA	NA	NA
16-AB03089	2016	BfR	Germany	Germany	Livestock	Broiler_chickens	Meat	NA	0	NA	NA	Microdilution	NA	>64	8	8	<=0.03	<=4	<=0.015	64	<=1	<=0.5	<=0.25	>1024	<=8	4	<=0.25	64	0.25	4	8	<=0.03	4	0.25	0.06	8	8	NA	NA	NA	blaCMY-2	NA
16-AB03090	2016	BfR	Germany	Germany	Livestock	Turkeys	Meat	NA	0	NA	NA	Microdilution	NA	>64	8	16	<=0.03	>128	>8	>64	<=1	<=0.5	<=0.25	>1024	128	8	<=0.25	4	16	0.06	0.12	<=0.03	8	0.25	<=0.015	64	8	blaCTX-M-1	NA	NA	NA	NA
16-AB03093	2016	BfR	Germany	Germany	Livestock	Turkeys	Meat	NA	0	NA	NA	Microdilution	NA	>64	8	8	<=0.03	8	0.25	>64	<=1	<=0.5	<=0.25	>1024	32	<=2	<=0.25	16	16	0.06	0.12	<=0.03	4	<=0.12	<=0.015	64	8	blaCTX-M-1	NA	NA	NA	NA
16-AB03094	2016	BfR	Germany	Germany	Livestock	Turkeys	Meat	NA	0	NA	NA	Microdilution	NA	>64	8	8	<=0.03	<=4	0.03	4	<=1	1	<=0.25	16	<=8	4	<=0.25	64	0.25	8	4	<=0.03	8	0.25	0.06	8	8	NA	NA	NA	blaCMY-2	NA
16-AB03095	2016	BfR	Germany	Germany	Livestock	Turkeys	Meat	NA	0	NA	NA	Microdilution	NA	>64	8	1	<=0.03	>128	>8	64	<=1	32	>32	>1024	<=8	64	<=0.25	4	8	0.06	0.12	<=0.03	8	<=0.12	<=0.015	32	2	blaCTX-M-1	NA	NA	NA	NA
16-AB03097	2016	BfR	Germany	Germany	Livestock	Broiler_chickens	Meat	NA	0	NA	NA	Microdilution	NA	>64	8	16	<=0.03	128	0.5	4	<=1	<=0.5	<=0.25	16	<=8	4	<=0.25	128	0.5	8	8	<=0.03	16	0.25	0.06	16	16	NA	NA	NA	blaCMY-2	NA
16-AB03098	2016	BfR	Germany	Germany	Livestock	Broiler_chickens	Meat	NA	0	NA	NA	Microdilution	NA	>64	4	4	<=0.03	128	0.25	<=2	<=1	<=0.5	>32	>1024	>128	8	<=0.25	32	0.25	4	4	<=0.03	4	0.25	<=0.015	4	8	NA	NA	NA	blaCMY-2	NA
16-AB03099	2016	BfR	Germany	Germany	Livestock	Broiler_chickens	Meat	NA	0	NA	NA	Microdilution	NA	>64	8	8	<=0.03	>128	>8	>64	<=1	<=0.5	0.5	>1024	<=8	16	0.5	16	16	0.12	0.25	<=0.03	8	<=0.12	<=0.015	128	8	blaCTX-M-1	NA	NA	NA	NA
16-AB03100	2016	BfR	Germany	Germany	Livestock	Turkeys	Meat	NA	0	NA	NA	Microdilution	NA	>64	8	1	<=0.03	<=4	<=0.015	<=2	<=1	<=0.5	<=0.25	<=8	<=8	8	<=0.25	4	4	0.06	0.12	<=0.03	4	0.25	<=0.015	16	1	blaCTX-M-1	NA	NA	NA	NA
16-AB03103	2016	BfR	Germany	Germany	Livestock	Broiler_chickens	Faeces/manure	NA	0	NA	NA	Microdilution	NA	>64	8	16	<=0.03	<=4	0.03	>64	<=1	32	<=0.25	>1024	<=8	8	<=0.25	64	0.5	16	8	<=0.03	8	0.5	0.06	32	16	NA	NA	NA	blaCMY-2	NA
16-AB03106	2016	BfR	Germany	Germany	Livestock	Broiler_chickens	Faeces/manure	NA	0	NA	NA	Microdilution	NA	>64	8	16	<=0.03	>128	>8	>64	<=1	<=0.5	0.5	>1024	<=8	16	0.5	16	16	0.12	0.25	<=0.03	8	0.25	<=0.015	64	8	blaCTX-M-15	NA	NA	NA	NA
16-AB03108	2016	BfR	Germany	Germany	Livestock	Broiler_chickens	Faeces/manure	NA	0	NA	NA	Microdilution	NA	>64	8	8	<=0.03	<=4	<=0.015	<=2	<=1	<=0.5	<=0.25	16	<=8	8	<=0.25	8	1	0.06	0.12	<=0.03	8	<=0.12	<=0.015	4	8	NA	blaTEM-52	NA	NA	NA
16-AB03111	2016	BfR	Germany	Germany	Livestock	Broiler_chickens	Faeces/manure	NA	0	NA	NA	Microdilution	NA	>64	8	16	<=0.03	>128	0.5	<=2	4	<=0.5	<=0.25	<=8	16	16	<=0.25	16	2	0.12	0.12	<=0.03	8	0.25	<=0.015	8	16	NA	blaTEM-52	NA	NA	NA
16-AB03112	2016	BfR	Germany	Germany	Livestock	Broiler_chickens	Faeces/manure	NA	0	NA	NA	Microdilution	NA	>64	8	16	<=0.03	>128	0.5	<=2	4	<=0.5	<=0.25	<=8	16	16	<=0.25	16	2	0.12	0.25	<=0.03	16	0.25	0.03	16	16	NA	blaTEM-52	NA	NA	NA
16-AB03114	2016	BfR	Germany	Germany	Livestock	Broiler_chickens	Faeces/manure	NA	0	NA	NA	Microdilution	NA	>64	8	2	<=0.03	>128	>8	>64	<=1	<=0.5	<=0.25	>1024	>128	8	<=0.25	4	8	0.12	0.25	<=0.03	8	0.25	<=0.015	64	2	blaCTX-M-1	NA	NA	NA	NA
16-AB03133	2016	BfR	Germany	Germany	Livestock	Broiler_chickens	Other	Sample taken from the caecum	0	NA	NA	Microdilution	NA	>64	8	1	<=0.03	<=4	<=0.015	64	<=1	<=0.5	>32	>1024	<=8	4	<=0.25	8	16	0.12	0.25	<=0.03	8	0.25	0.03	64	1	blaCTX-M-1	NA	NA	NA	NA
16-AB03135	2016	BfR	Germany	Germany	Livestock	Turkeys	Meat	NA	0	NA	NA	Microdilution	NA	>64	8	8	<=0.03	<=4	<=0.015	<=2	<=1	<=0.5	<=0.25	>1024	32	8	<=0.25	4	0.5	0.06	0.12	<=0.03	4	0.25	<=0.015	2	4	NA	blaTEM-52	NA	NA	NA
16-AB03136	2016	BfR	Germany	Germany	Livestock	Turkeys	Meat	NA	0	NA	NA	Microdilution	NA	>64	8	4	<=0.03	<=4	0.03	<=2	<=1	1	<=0.25	>1024	32	4	<=0.25	8	2	0.06	0.25	<=0.03	8	<=0.12	0.03	4	16	NA	blaTEM-52	NA	NA	NA
16-AB03138	2016	BfR	Germany	Germany	Livestock	Broiler_chickens	Meat	NA	0	NA	NA	Microdilution	NA	>64	8	8	<=0.03	<=4	<=0.015	64	<=1	16	<=0.25	>1024	<=8	4	<=0.25	64	0.25	8	4	<=0.03	8	0.25	0.03	8	8	NA	NA	NA	blaCMY-2	NA
16-AB03140	2016	BfR	Germany	Germany	Livestock	Broiler_chickens	Meat	NA	0	NA	NA	Microdilution	NA	>64	8	8	<=0.03	<=4	<=0.015	64	<=1	16	<=0.25	>1024	<=8	4	<=0.25	64	0.25	8	8	<=0.03	8	0.25	0.03	8	8	NA	NA	NA	blaCMY-2	NA
16-AB03141	2016	BfR	Germany	Germany	Livestock	Turkeys	Meat	NA	0	NA	NA	Microdilution	NA	>64	8	4	<=0.03	8	0.25	64	<=1	<=0.5	>32	>1024	<=8	<=2	<=0.25	4	32	0.06	0.12	<=0.03	4	<=0.12	<=0.015	64	4	blaCTX-M-1	NA	NA	NA	NA
16-AB03148	2016	BfR	Germany	Germany	Livestock	Broiler_chickens	Meat	NA	0	NA	NA	Microdilution	NA	>64	4	16	<=0.03	>128	8	4	<=1	<=0.5	>32	>1024	16	8	<=0.25	16	0.5	0.06	0.12	<=0.03	8	<=0.12	<=0.015	4	16	NA	NA	blaSHV-12	NA	NA
16-AB03154	2016	BfR	Germany	Germany	Livestock	Broiler_chickens	Meat	NA	0	NA	NA	Microdilution	NA	>64	8	1	<=0.03	>128	>8	>64	<=1	<=0.5	>32	>1024	<=8	>64	<=0.25	8	4	0.12	0.25	<=0.03	8	<=0.12	<=0.015	64	1	blaCTX-M-1	NA	NA	NA	NA
16-AB03155	2016	BfR	Germany	Germany	Livestock	Turkeys	Meat	NA	0	NA	NA	Microdilution	NA	>64	8	8	<=0.03	>128	>8	<=2	<=1	<=0.5	<=0.25	16	<=8	8	<=0.25	8	8	0.06	0.25	<=0.03	16	<=0.12	<=0.015	64	8	blaCTX-M-1	NA	NA	NA	NA
16-AB03163	2016	BfR	Germany	Germany	Livestock	Turkeys	Meat	NA	0	NA	NA	Microdilution	NA	>64	8	1	<=0.03	<=4	<=0.015	64	<=1	1	<=0.25	>1024	<=8	8	<=0.25	4	32	0.06	0.12	<=0.03	4	0.25	<=0.015	32	1	blaCTX-M-1	NA	NA	NA	NA
16-AB03166	2016	BfR	Germany	Germany	Livestock	Broiler_chickens	Other	Sample taken from the caecum	0	NA	NA	Microdilution	NA	>64	8	16	<=0.03	128	4	4	<=1	<=0.5	>32	>1024	<=8	16	<=0.25	16	0.5	0.06	0.25	<=0.03	16	<=0.12	<=0.015	8	32	NA	NA	blaSHV-12	NA	NA
16-AB03174	2016	BfR	Germany	Germany	Livestock	Turkeys	Meat	NA	0	NA	NA	Microdilution	NA	>64	8	2	<=0.03	>128	>8	>64	<=1	<=0.5	>32	>1024	32	32	<=0.25	4	8	0.06	0.25	<=0.03	8	<=0.12	0.03	64	2	blaCTX-M-1	NA	NA	NA	NA
16-AB03184	2016	BfR	Germany	Germany	Wild_animals	Wild_boars	Faeces/manure	NA	0	NA	NA	Microdilution	NA	>64	8	4	<=0.03	<=4	0.03	<=2	<=1	32	0.5	16	<=8	4	<=0.25	8	64	0.12	0.12	<=0.03	4	0.25	0.06	128	2	blaCTX-M-1	NA	NA	NA	NA
16-AB03185	2016	BfR	Germany	Germany	Livestock	Turkeys	Other	Sample taken from the caecum	0	NA	NA	Microdilution	NA	>64	8	8	<=0.03	<=4	0.03	<=2	<=1	1	<=0.25	16	<=8	<=2	<=0.25	64	0.25	4	4	<=0.03	8	0.5	0.06	8	8	NA	NA	NA	blaCMY-2	NA
16-AB03186	2016	BfR	Germany	Germany	Livestock	Turkeys	Other	Sample taken from the caecum	0	NA	NA	Microdilution	NA	>64	8	8	<=0.03	<=4	0.25	<=2	<=1	<=0.5	<=0.25	<=8	<=8	8	<=0.25	4	64	0.12	0.12	<=0.03	8	0.5	<=0.015	64	8	blaCTX-M-15	NA	NA	NA	NA
16-AB03187	2016	BfR	Germany	Germany	Livestock	Turkeys	Other	Sample taken from the caecum	0	NA	NA	Microdilution	NA	>64	8	8	<=0.03	16	0.5	<=2	<=1	<=0.5	<=0.25	16	<=8	4	<=0.25	8	2	0.06	0.25	<=0.03	8	0.25	0.03	4	8	NA	blaTEM-52	NA	NA	NA
16-AB03188	2016	BfR	Germany	Germany	Livestock	Turkeys	Other	Sample taken from the caecum	0	NA	NA	Microdilution	NA	>64	8	16	<=0.03	>128	>8	<=2	<=1	1	<=0.25	<=8	<=8	8	<=0.25	8	8	0.06	0.25	<=0.03	16	<=0.12	<=0.015	64	8	blaCTX-M-15	NA	NA	NA	NA
16-AB03189	2016	BfR	Germany	Germany	Livestock	Turkeys	Other	Sample taken from the caecum	0	NA	NA	Microdilution	NA	>64	8	1	<=0.03	<=4	<=0.015	<=2	<=1	<=0.5	<=0.25	16	<=8	4	<=0.25	4	32	0.06	0.12	<=0.03	4	0.25	<=0.015	32	2	blaCTX-M-1	NA	NA	NA	NA
16-AB03190	2016	BfR	Germany	Germany	Livestock	Turkeys	Other	Sample taken from the caecum	0	NA	NA	Microdilution	NA	>64	8	0.5	<=0.03	>128	8	64	8	>32	>32	>1024	<=8	16	<=0.25	4	8	0.06	0.12	<=0.03	4	0.25	<=0.015	64	1	blaCTX-M-1	NA	NA	NA	NA
16-AB03191	2016	BfR	Germany	Germany	Livestock	Turkeys	Other	Sample taken from the caecum	0	NA	NA	Microdilution	NA	>64	8	4	<=0.03	8	0.25	<=2	<=1	<=0.5	0.5	>1024	16	4	<=0.25	16	1	0.06	0.12	<=0.03	8	<=0.12	0.03	4	8	NA	blaTEM-52	NA	NA	NA
16-AB03192	2016	BfR	Germany	Germany	Livestock	Broiler_chickens	Faeces/manure	NA	0	NA	NA	Microdilution	NA	>64	8	2	<=0.03	<=4	<=0.015	64	<=1	<=0.5	<=0.25	16	<=8	8	<=0.25	4	64	0.06	0.25	<=0.03	8	0.25	<=0.015	64	2	blaCTX-M-1	NA	NA	NA	NA
16-AB03193	2016	BfR	Germany	Germany	Livestock	Turkeys	Other	Sample taken from the caecum	0	NA	NA	Microdilution	NA	>64	8	0.5	<=0.03	<=4	<=0.015	4	<=1	<=0.5	<=0.25	16	<=8	4	<=0.25	4	8	0.06	0.12	<=0.03	8	<=0.12	<=0.015	32	0.5	blaCTX-M-15	NA	NA	NA	NA
16-AB03194	2016	BfR	Germany	Germany	Livestock	Turkeys	Other	Sample taken from the caecum	0	NA	NA	Microdilution	NA	>64	8	8	<=0.03	>128	>8	<=2	<=1	<=0.5	<=0.25	<=8	<=8	8	<=0.25	8	8	0.12	0.12	<=0.03	8	<=0.12	<=0.015	64	8	blaCTX-M-15	NA	NA	NA	NA
16-AB03232	2016	BfR	Germany	Germany	Livestock	Broiler_chickens	Other	Sample taken from the caecum	0	NA	NA	Microdilution	NA	>64	8	16	<=0.03	>128	8	<=2	<=1	<=0.5	>32	<=8	<=8	8	<=0.25	16	1	0.12	0.25	<=0.03	16	0.25	<=0.015	16	32	NA	NA	blaSHV-12	NA	NA
16-AB03238	2016	BfR	Germany	Germany	Livestock	Broiler_chickens	Faeces/manure	NA	0	NA	NA	Microdilution	NA	>64	8	8	<=0.03	<=4	<=0.015	<=2	<=1	<=0.5	<=0.25	<=8	<=8	8	<=0.25	8	2	0.06	0.12	<=0.03	8	0.25	<=0.015	8	16	NA	blaTEM-52	NA	NA	NA
16-AB03240	2016	BfR	Germany	Germany	Livestock	Broiler_chickens	Faeces/manure	NA	0	NA	NA	Microdilution	NA	>64	4	16	<=0.03	<=4	<=0.015	64	<=1	<=0.5	0.5	>1024	32	8	<=0.25	4	0.5	0.06	0.12	<=0.03	8	<=0.12	<=0.015	8	16	NA	NA	blaSHV-12	NA	NA
16-AB03246	2016	BfR	Germany	Germany	Livestock	Broiler_chickens	Faeces/manure	NA	0	NA	NA	Microdilution	NA	>64	4	2	<=0.03	<=4	4	<=2	<=1	<=0.5	<=0.25	<=8	<=8	4	<=0.25	8	0.5	0.12	0.12	<=0.03	8	<=0.12	<=0.015	2	4	NA	blaTEM-52	NA	NA	NA
16-AB03249	2016	BfR	Germany	Germany	Livestock	Broiler_chickens	Faeces/manure	NA	0	NA	NA	Microdilution	NA	>64	2	2	<=0.03	>128	4	<=2	<=1	<=0.5	<=0.25	<=8	<=8	4	<=0.25	8	0.5	0.06	0.12	<=0.03	4	<=0.12	<=0.015	2	2	NA	blaTEM-52	NA	NA	NA
16-AB03251	2016	BfR	Germany	Germany	Livestock	Broiler_chickens	Faeces/manure	NA	0	NA	NA	Microdilution	NA	>64	8	8	<=0.03	<=4	<=0.015	>64	<=1	<=0.5	>32	>1024	<=8	8	<=0.25	64	0.25	4	4	<=0.03	8	0.25	0.03	8	8	NA	NA	NA	blaCMY-2	NA
16-AB03253	2016	BfR	Germany	Germany	Livestock	Broiler_chickens	Faeces/manure	NA	0	NA	NA	Microdilution	NA	>64	8	16	<=0.03	<=4	<=0.015	>64	<=1	<=0.5	>32	>1024	>128	8	<=0.25	8	2	0.06	0.12	<=0.03	4	<=0.12	<=0.015	16	32	NA	NA	blaSHV-12	NA	NA
16-AB03257	2016	BfR	Germany	Germany	Livestock	Broiler_chickens	Faeces/manure	NA	0	NA	NA	Microdilution	NA	>64	8	1	<=0.03	>128	>8	64	<=1	1	>32	>1024	<=8	8	<=0.25	8	16	0.06	0.12	<=0.03	4	<=0.12	<=0.015	64	1	blaCTX-M-1	NA	NA	NA	NA
16-AB03259	2016	BfR	Germany	Germany	Livestock	Broiler_chickens	Faeces/manure	NA	0	NA	NA	Microdilution	NA	>64	8	2	<=0.03	>128	>8	64	<=1	<=0.5	>32	>1024	<=8	8	<=0.25	8	16	0.06	0.25	<=0.03	16	<=0.12	<=0.015	32	2	blaCTX-M-1	NA	NA	NA	NA
16-AB03267	2016	BfR	Germany	Germany	Livestock	Broiler_chickens	Faeces/manure	NA	0	NA	NA	Microdilution	NA	>64	8	16	<=0.03	32	0.5	>64	<=1	<=0.5	<=0.25	>1024	64	8	0.5	4	1	0.12	0.25	<=0.03	8	0.25	<=0.015	4	32	NA	NA	blaSHV-12	NA	NA
16-AB03269	2016	BfR	Germany	Germany	Livestock	Broiler_chickens	Faeces/manure	NA	0	NA	NA	Microdilution	NA	>64	8	1	<=0.03	>128	>8	64	<=1	16	>32	>1024	<=8	4	<=0.25	4	2	0.06	0.12	<=0.03	4	0.25	<=0.015	4	2	NA	NA	blaSHV-2	NA	NA
16-AB03271	2016	BfR	Germany	Germany	Livestock	Broiler_chickens	Faeces/manure	NA	0	NA	NA	Microdilution	NA	>64	4	8	<=0.03	8	0.5	64	<=1	<=0.5	<=0.25	>1024	32	8	<=0.25	8	0.5	0.06	0.12	<=0.03	8	<=0.12	<=0.015	4	8	NA	NA	blaSHV-12	NA	NA
16-AB03273	2016	BfR	Germany	Germany	Livestock	Broiler_chickens	Faeces/manure	NA	0	NA	NA	Microdilution	NA	>64	8	16	<=0.03	16	0.5	>64	<=1	<=0.5	<=0.25	>1024	128	8	<=0.25	8	4	0.06	0.12	<=0.03	8	0.25	<=0.015	32	64	NA	NA	blaSHV-12	NA	NA
16-AB03275	2016	BfR	Germany	Germany	Livestock	Broiler_chickens	Faeces/manure	NA	0	NA	NA	Microdilution	NA	>64	4	16	<=0.03	<=4	<=0.015	64	<=1	<=0.5	>32	>1024	32	8	<=0.25	8	0.5	0.06	0.12	<=0.03	4	0.25	<=0.015	8	16	NA	NA	blaSHV-12	NA	NA
16-AB03277	2016	BfR	Germany	Germany	Livestock	Broiler_chickens	Faeces/manure	NA	0	NA	NA	Microdilution	NA	>64	8	16	<=0.03	16	0.5	>64	<=1	<=0.5	>32	>1024	64	8	<=0.25	4	2	0.06	0.25	<=0.03	8	<=0.12	<=0.015	8	32	NA	NA	blaSHV-12	NA	NA
16-AB03279	2016	BfR	Germany	Germany	Livestock	Broiler_chickens	Faeces/manure	NA	0	NA	NA	Microdilution	NA	>64	8	16	<=0.03	16	0.5	>64	<=1	<=0.5	>32	>1024	128	8	0.5	8	4	0.06	0.12	<=0.03	8	0.25	<=0.015	32	64	NA	NA	blaSHV-12	NA	NA
16-AB03281	2016	BfR	Germany	Germany	Livestock	Broiler_chickens	Faeces/manure	NA	0	NA	NA	Microdilution	NA	>64	8	8	<=0.03	<=4	0.03	<=2	<=1	<=0.5	>32	>1024	64	8	<=0.25	4	1	0.06	0.12	<=0.03	8	<=0.12	<=0.015	4	16	NA	blaTEM-52	NA	NA	NA
16-AB03283	2016	BfR	Germany	Germany	Livestock	Broiler_chickens	Faeces/manure	NA	0	NA	NA	Microdilution	NA	>64	4	16	<=0.03	<=4	<=0.015	64	<=1	<=0.5	<=0.25	>1024	32	8	<=0.25	4	0.25	0.06	0.12	<=0.03	8	0.25	<=0.015	4	16	NA	NA	blaSHV-12	NA	NA
16-AB03285	2016	BfR	Germany	Germany	Livestock	Broiler_chickens	Faeces/manure	NA	0	NA	NA	Microdilution	NA	>64	8	2	0.06	64	0.25	4	4	<=0.5	>32	>1024	<=8	8	<=0.25	8	8	0.06	0.12	0.06	8	0.25	0.25	4	4	NA	blaTEM-15, blaTEM-20, blaTEM-52	NA	NA	NA
16-AB03287	2016	BfR	Germany	Germany	Livestock	Broiler_chickens	Faeces/manure	NA	0	NA	NA	Microdilution	NA	>64	8	16	<=0.03	<=4	<=0.015	64	<=1	32	<=0.25	>1024	<=8	4	<=0.25	64	0.25	8	8	<=0.03	8	0.25	0.03	8	8	NA	NA	NA	blaCMY-2	NA
16-AB03289	2016	BfR	Germany	Germany	Livestock	Broiler_chickens	Faeces/manure	NA	0	NA	NA	Microdilution	NA	>64	8	8	<=0.03	<=4	0.03	<=2	<=1	<=0.5	>32	>1024	64	8	<=0.25	8	1	0.06	0.12	<=0.03	8	<=0.12	<=0.015	4	8	NA	blaTEM-52, blaTEM-106	NA	NA	NA
16-AB03291	2016	BfR	Germany	Germany	Livestock	Broiler_chickens	Faeces/manure	NA	0	NA	NA	Microdilution	NA	>64	8	16	<=0.03	<=4	<=0.015	>64	4	<=0.5	<=0.25	>1024	32	16	0.5	4	0.5	0.06	0.12	<=0.03	8	0.25	<=0.015	4	16	NA	NA	blaSHV-12	NA	NA
16-AB03293	2016	BfR	Germany	Germany	Livestock	Broiler_chickens	Faeces/manure	NA	0	NA	NA	Microdilution	NA	>64	8	8	<=0.03	<=4	<=0.015	64	<=1	16	<=0.25	>1024	<=8	4	<=0.25	4	0.5	0.06	0.12	<=0.03	8	0.25	<=0.015	4	16	NA	NA	NA	blaCMY-2	NA
16-AB03308	2016	BfR	Germany	Germany	Livestock	Broiler_chickens	Other	Sample taken from the caecum	0	NA	NA	Microdilution	NA	>64	8	16	<=0.03	>128	8	>64	<=1	>32	>32	>1024	<=8	>64	<=0.25	64	0.25	4	4	<=0.03	8	<=0.12	0.03	8	16	NA	NA	NA	blaCMY-2	NA
16-AB03309	2016	BfR	Germany	Germany	Livestock	Broiler_chickens	Other	Sample taken from the caecum	0	NA	NA	Microdilution	NA	>64	8	16	<=0.03	>128	>8	4	<=1	<=0.5	<=0.25	<=8	16	8	<=0.25	8	1	0.12	0.25	<=0.03	8	0.25	<=0.015	8	32	NA	NA	blaSHV-12	NA	NA
16-AB03310	2016	BfR	Germany	Germany	Livestock	Broiler_chickens	Other	Sample taken from the caecum	0	NA	NA	Microdilution	NA	>64	8	8	<=0.03	<=4	<=0.015	<=2	<=1	<=0.5	<=0.25	16	<=8	8	<=0.25	4	2	0.06	0.12	<=0.03	4	<=0.12	<=0.015	8	16	NA	blaTEM-52	NA	NA	NA
16-AB03311	2016	BfR	Germany	Germany	Livestock	Broiler_chickens	Other	Sample taken from the caecum	0	NA	NA	Microdilution	NA	>64	8	8	<=0.03	<=4	0.03	<=2	<=1	<=0.5	<=0.25	<=8	<=8	8	<=0.25	32	0.25	4	8	<=0.03	4	0.5	0.03	8	8	NA	NA	NA	blaCMY-2	NA
16-AB03312	2016	BfR	Germany	Germany	Livestock	Broiler_chickens	Other	Sample taken from the caecum	0	NA	NA	Microdilution	NA	>64	8	16	<=0.03	>128	4	<=2	<=1	<=0.5	<=0.25	<=8	<=8	8	<=0.25	4	0.5	0.06	0.12	<=0.03	8	0.25	<=0.015	4	16	NA	NA	blaSHV-12	NA	NA
16-AB03313	2016	BfR	Germany	Germany	Livestock	Broiler_chickens	Other	Sample taken from the caecum	0	NA	NA	Microdilution	NA	>64	8	16	<=0.03	<=4	<=0.015	>64	<=1	32	<=0.25	>1024	<=8	4	<=0.25	64	0.25	8	8	<=0.03	8	0.25	0.03	8	8	NA	NA	NA	blaCMY-2	NA
16-AB03314	2016	BfR	Germany	Germany	Livestock	Broiler_chickens	Other	Sample taken from the caecum	0	NA	NA	Microdilution	NA	>64	2	8	<=0.03	8	0.25	4	<=1	<=0.5	<=0.25	>1024	<=8	4	<=0.25	4	0.25	0.06	0.12	<=0.03	2	<=0.12	<=0.015	4	16	NA	NA	blaSHV-12	NA	NA
16-AB03315	2016	BfR	Germany	Germany	Livestock	Broiler_chickens	Other	Sample taken from the caecum	0	NA	NA	Microdilution	NA	>64	8	8	<=0.03	<=4	<=0.015	>64	<=1	16	<=0.25	>1024	<=8	4	<=0.25	64	0.25	8	8	<=0.03	4	0.25	0.03	8	8	NA	NA	NA	blaCMY-2	NA
16-AB03335	2016	BfR	Germany	Germany	Wild_animals	Wild_boars	Faeces/manure	NA	0	NA	NA	Microdilution	NA	>64	8	1	<=0.03	>128	8	64	<=1	1	0.5	>1024	64	64	0.5	4	8	0.06	0.12	<=0.03	8	0.5	<=0.015	128	1	blaCTX-M-14	NA	NA	NA	NA
16-AB03336	2016	BfR	Germany	Germany	Livestock	Broiler_chickens	Faeces/manure	NA	0	NA	NA	Microdilution	NA	>64	8	8	<=0.03	8	0.25	<=2	<=1	<=0.5	>32	>1024	<=8	8	<=0.25	4	0.5	0.06	0.12	<=0.03	4	0.25	<=0.015	4	16	NA	NA	blaSHV-12	NA	NA
16-AB03337	2016	BfR	Germany	Germany	Livestock	Broiler_chickens	Faeces/manure	NA	0	NA	NA	Microdilution	NA	>64	8	4	<=0.03	<=4	<=0.015	<=2	<=1	<=0.5	<=0.25	<=8	<=8	8	<=0.25	4	1	0.06	0.12	<=0.03	4	<=0.12	<=0.015	4	8	NA	blaTEM-20, blaTEM-52	NA	NA	NA
16-AB03338	2016	BfR	Germany	Germany	Livestock	Broiler_chickens	Other	Sample taken from the caecum	0	NA	NA	Microdilution	NA	>64	8	8	<=0.03	>128	8	64	<=1	<=0.5	<=0.25	<=8	<=8	4	<=0.25	8	0.25	0.06	0.12	<=0.03	4	0.25	<=0.015	4	16	NA	NA	blaSHV-12	NA	NA
16-AB03339	2016	BfR	Germany	Germany	Livestock	Broiler_chickens	Other	Sample taken from the caecum	0	NA	NA	Microdilution	NA	>64	8	8	<=0.03	>128	8	64	<=1	1	<=0.25	<=8	<=8	4	<=0.25	4	0.5	0.06	0.12	<=0.03	4	0.25	<=0.015	4	8	NA	NA	blaSHV-12	NA	NA
16-AB03340	2016	BfR	Germany	Germany	Livestock	Broiler_chickens	Meat	NA	0	NA	NA	Microdilution	NA	>64	4	16	<=0.03	8	0.5	<=2	<=1	<=0.5	<=0.25	<=8	<=8	8	<=0.25	4	0.5	0.06	0.12	<=0.03	8	0.25	<=0.015	4	16	NA	NA	blaSHV-12	NA	NA
16-AB03341	2016	BfR	Germany	Germany	Livestock	Turkeys	Meat	NA	0	NA	NA	Microdilution	NA	>64	8	8	<=0.03	8	0.5	64	<=1	1	>32	<=8	<=8	8	0.5	4	64	0.06	0.25	<=0.03	8	0.5	<=0.015	128	8	blaCTX-M-1	NA	NA	NA	NA
16-AB03343	2016	BfR	Germany	Germany	Livestock	Broiler_chickens	Meat	NA	0	NA	NA	Microdilution	NA	>64	8	8	<=0.03	8	0.25	4	<=1	<=0.5	0.5	<=8	<=8	8	<=0.25	4	16	0.06	0.12	<=0.03	8	0.5	<=0.015	16	8	NA	NA	blaSHV-12	NA	NA
16-AB03344	2016	BfR	Germany	Germany	Livestock	Turkeys	Meat	NA	0	NA	NA	Microdilution	NA	>64	8	1	<=0.03	>128	0.5	>64	<=1	<=0.5	<=0.25	<=8	<=8	8	0.5	4	16	0.12	0.25	<=0.03	8	<=0.12	<=0.015	32	2	blaCTX-M-1	NA	NA	NA	NA
16-AB03368	2016	BfR	Germany	Germany	Livestock	Broiler_chickens	Meat	NA	0	NA	NA	Microdilution	NA	>64	8	8	<=0.03	<=4	<=0.015	64	<=1	<=0.5	<=0.25	>1024	<=8	4	<=0.25	64	0.25	8	8	<=0.03	8	0.25	0.03	8	8	NA	NA	NA	blaCMY-2	NA
16-AB03369	2016	BfR	Germany	Germany	Livestock	Turkeys	Meat	NA	0	NA	NA	Microdilution	NA	>64	8	4	<=0.03	<=4	<=0.015	<=2	<=1	<=0.5	<=0.25	>1024	32	4	<=0.25	8	1	0.06	0.12	<=0.03	4	<=0.12	<=0.015	4	4	NA	blaTEM-52	NA	NA	NA
16-AB03370	2016	BfR	Germany	Germany	Livestock	Turkeys	Meat	NA	0	NA	NA	Microdilution	NA	>64	8	4	<=0.03	<=4	<=0.015	<=2	<=1	<=0.5	<=0.25	>1024	16	4	<=0.25	4	1	0.06	0.12	0.06	4	0.25	<=0.015	4	4	NA	blaTEM-52	NA	NA	NA
16-AB03371	2016	BfR	Germany	Germany	Livestock	Broiler_chickens	Meat	NA	0	NA	NA	Microdilution	NA	>64	8	8	<=0.03	>128	>8	<=2	<=1	<=0.5	<=0.25	>1024	<=8	4	<=0.25	64	0.25	4	4	<=0.03	8	<=0.12	<=0.015	8	8	NA	NA	NA	blaCMY-2	NA
16-AB03373	2016	BfR	Germany	Germany	Wild_animals	Wild_boars	Faeces/manure	NA	0	NA	NA	Microdilution	NA	>64	8	2	<=0.03	<=4	<=0.015	<=2	<=1	<=0.5	>32	>1024	<=8	>64	<=0.25	8	4	0.06	0.12	<=0.03	8	<=0.12	<=0.015	32	1	blaCTX-M-1	NA	NA	NA	NA
16-AB03376	2016	BfR	Germany	Germany	Livestock	Turkeys	Meat	NA	0	NA	NA	Microdilution	NA	>32	8	1	<=0.03	>128	0.25	<=2	<=1	32	0.5	<=8	<=8	4	<=0.25	4	8	0.06	0.12	<=0.03	4	<=0.12	<=0.015	16	1	blaCTX-M-1	NA	NA	NA	NA
16-AB03379	2016	BfR	Germany	Germany	Livestock	Broiler_chickens	Meat	NA	0	NA	NA	Microdilution	NA	>64	4	16	<=0.03	<=4	0.25	>64	<=1	<=0.5	<=0.25	<=8	<=8	8	1	4	0.25	0.06	0.25	<=0.03	8	<=0.12	<=0.015	4	8	NA	NA	blaSHV-12	NA	NA
16-AB03380	2016	BfR	Germany	Germany	Livestock	Turkeys	Meat	NA	0	NA	NA	Microdilution	NA	>64	2	2	<=0.03	>128	>8	64	<=1	<=0.5	>32	>1024	32	8	<=0.25	32	0.06	1	2	<=0.03	4	<=0.12	<=0.015	2	8	NA	NA	NA	blaCMY-2	NA
16-AB03381	2016	BfR	Germany	Germany	Livestock	Turkeys	Meat	NA	0	NA	NA	Microdilution	NA	>64	8	1	<=0.03	>128	>8	>64	<=1	1	>32	>1024	128	8	<=0.25	4	8	0.06	0.12	<=0.03	4	0.25	<=0.015	32	1	blaCTX-M-1	NA	NA	NA	NA
16-AB03383	2016	BfR	Germany	Germany	Livestock	Broiler_chickens	Other	Sample taken from the caecum	0	NA	NA	Microdilution	NA	>64	8	1	<=0.03	<=4	<=0.015	64	<=1	<=0.5	<=0.25	>1024	<=8	4	<=0.25	2	16	0.06	0.12	<=0.03	4	0.25	<=0.015	32	0.5	blaCTX-M-1	NA	NA	NA	NA
16-AB03386	2016	BfR	Germany	Germany	Livestock	Broiler_chickens	Meat	NA	0	NA	NA	Microdilution	NA	>64	8	16	<=0.03	<=4	0.03	64	<=1	<=0.5	>32	>1024	64	4	<=0.25	32	64	0.12	0.5	<=0.03	16	0.25	0.06	128	16	blaCTX-M-1	NA	NA	NA	NA
16-AB03417	2016	BfR	Germany	Germany	Livestock	Broiler_chickens	Meat	NA	0	NA	NA	Microdilution	NA	>64	4	2	<=0.03	<=4	<=0.015	<=2	<=1	<=0.5	<=0.25	16	<=8	16	<=0.25	4	0.5	0.06	0.12	<=0.03	4	0.25	<=0.015	4	4	NA	blaTEM-52	NA	NA	NA
16-AB03419	2016	BfR	Germany	Germany	Livestock	Broiler_chickens	Other	Sample taken from the caecum	0	NA	NA	Microdilution	NA	>64	8	0.5	<=0.03	<=4	<=0.015	<=2	<=1	<=0.5	>32	>1024	<=8	4	<=0.25	4	16	0.06	0.12	<=0.03	4	<=0.12	<=0.015	32	0.5	blaCTX-M-1	NA	NA	NA	NA
16-AB03421	2016	BfR	Germany	Germany	Livestock	Broiler_chickens	Other	Sample taken from the caecum	0	NA	NA	Microdilution	NA	>64	8	16	<=0.03	>128	>8	<=2	<=1	<=0.5	<=0.25	<=8	16	16	<=0.25	32	1	0.12	0.25	<=0.03	16	0.25	<=0.015	16	64	NA	NA	blaSHV-12	NA	NA
16-AB03425	2016	BfR	Germany	Germany	Livestock	Turkeys	Meat	NA	0	NA	NA	Microdilution	NA	>64	4	16	<=0.03	16	0.5	<=2	<=1	<=0.5	<=0.25	<=8	<=8	8	<=0.25	4	0.5	0.06	0.12	<=0.03	4	<=0.12	<=0.015	4	32	NA	NA	blaSHV-12	NA	NA
16-AB03426	2016	BfR	Germany	Germany	Livestock	Turkeys	Meat	NA	0	NA	NA	Microdilution	NA	>64	8	4	<=0.03	8	0.5	<=2	<=1	<=0.5	<=0.25	>1024	32	4	<=0.25	4	1	0.06	0.12	<=0.03	4	0.25	<=0.015	4	4	NA	blaTEM-52	NA	NA	NA
16-AB03431	2016	BfR	Germany	Germany	Livestock	Broiler_chickens	Faeces/manure	NA	0	NA	NA	Microdilution	NA	>64	8	2	<=0.03	>128	8	64	<=1	16	<=0.25	>1024	128	8	<=0.25	4	1	0.06	0.12	<=0.03	8	0.25	<=0.015	4	2	NA	NA	blaSHV-2	NA	NA
16-AB03436	2016	BfR	Germany	Germany	Livestock	Broiler_chickens	Other	Sample taken from the caecum	0	NA	NA	Microdilution	NA	>64	2	2	<=0.03	>128	0.5	4	<=1	<=0.5	0.5	>1024	64	8	<=0.25	8	0.25	0.06	0.12	<=0.03	16	<=0.12	<=0.015	2	2	NA	blaTEM-52	NA	NA	NA
16-AB03438	2016	BfR	Germany	Germany	Livestock	Turkeys	Meat	NA	0	NA	NA	Microdilution	NA	>64	8	16	<=0.03	128	0.5	>64	>16	>32	<=0.25	>1024	16	4	<=0.25	8	0.5	0.06	0.12	<=0.03	4	<=0.12	<=0.015	16	32	NA	NA	blaSHV-12	NA	NA
16-AB03441	2016	BfR	Germany	Germany	Livestock	Turkeys	Meat	NA	0	NA	NA	Microdilution	NA	>64	8	2	<=0.03	>128	>8	<=2	<=1	1	<=0.25	16	<=8	4	<=0.25	16	16	0.12	0.25	<=0.03	8	0.25	0.03	64	2	blaCTX-M-1	NA	NA	NA	NA
16-AB03443	2016	BfR	Germany	Germany	Livestock	Broiler_chickens	Meat	NA	0	NA	NA	Microdilution	NA	>64	4	4	<=0.03	>128	8	4	<=1	<=0.5	>32	>1024	>128	16	<=0.25	8	0.5	0.06	0.5	<=0.03	32	0.25	<=0.015	2	4	NA	blaTEM-52	NA	NA	NA
16-AB03444	2016	BfR	Germany	Germany	Livestock	Turkeys	Meat	NA	0	NA	NA	Microdilution	NA	>64	8	16	<=0.03	>128	8	4	<=1	<=0.5	>32	>1024	16	8	<=0.25	16	1	0.06	0.25	<=0.03	8	<=0.12	<=0.015	4	16	NA	NA	blaSHV-12	NA	NA
16-AB03484	2016	BfR	Germany	Germany	Wild_animals	Wild_boars	Faeces/manure	NA	0	NA	NA	Microdilution	NA	>64	8	2	<=0.03	<=4	<=0.015	4	<=1	<=0.5	<=0.25	16	<=8	4	<=0.25	4	16	0.06	0.12	<=0.03	4	0.25	<=0.015	64	2	blaCTX-M-1	NA	NA	NA	NA
16-AB03497	2016	BfR	Germany	Germany	Livestock	Turkeys	Meat	NA	0	NA	NA	Microdilution	NA	>64	8	8	<=0.03	>128	0.5	<=2	<=1	<=0.5	<=0.25	>1024	<=8	4	<=0.25	4	64	0.06	0.25	<=0.03	8	0.25	<=0.015	32	2	blaCTX-M-1	NA	NA	NA	NA
16-AB03499	2016	BfR	Germany	Germany	Livestock	Broiler_chickens	Meat	NA	0	NA	NA	Microdilution	NA	>64	8	16	<=0.03	8	0.25	<=2	<=1	<=0.5	>32	>1024	<=8	4	<=0.25	4	0.25	0.06	0.12	<=0.03	4	0.25	<=0.015	4	16	NA	NA	blaSHV-12	NA	NA
16-AB03506	2016	BfR	Germany	Germany	Livestock	Turkeys	Meat	NA	0	NA	NA	Microdilution	NA	>64	8	8	<=0.03	<=4	<=0.015	32	<=1	<=0.5	0.5	>1024	<=8	8	<=0.25	4	32	0.06	0.12	<=0.03	8	0.25	<=0.015	128	8	blaCTX-M-1	NA	NA	NA	NA
16-AB03508	2016	BfR	Germany	Germany	Livestock	Turkeys	Meat	NA	0	NA	NA	Microdilution	NA	>64	8	1	<=0.03	<=4	<=0.015	<=2	<=1	>32	<=0.25	<=8	<=8	4	<=0.25	8	32	0.06	0.12	0.06	8	0.25	<=0.015	64	2	blaCTX-M-1	NA	NA	NA	NA
16-AB03512	2016	BfR	Germany	Germany	Livestock	Turkeys	Meat	NA	0	NA	NA	Microdilution	NA	>64	8	4	<=0.03	<=4	<=0.015	<=2	<=1	<=0.5	<=0.25	>1024	32	4	<=0.25	4	0.5	0.06	0.12	<=0.03	4	0.5	<=0.015	4	2	NA	blaTEM-52	NA	NA	NA
16-AB03514	2016	BfR	Germany	Germany	Livestock	Turkeys	Meat	NA	0	NA	NA	Microdilution	NA	>64	4	8	<=0.03	8	0.5	>64	<=1	<=0.5	<=0.25	<=8	<=8	<=2	<=0.25	64	0.25	4	4	<=0.03	8	0.5	0.06	8	8	NA	NA	NA	blaCMY-2	NA
16-AB03515	2016	BfR	Germany	Germany	Livestock	Turkeys	Meat	NA	0	NA	NA	Microdilution	NA	>64	2	16	<=0.03	8	0.25	>64	<=1	<=0.5	<=0.25	>1024	16	8	<=0.25	4	0.5	0.06	0.12	<=0.03	8	0.25	0.03	2	16	NA	NA	blaSHV-12	NA	NA
16-AB03516	2016	BfR	Germany	Germany	Livestock	Turkeys	Meat	NA	0	NA	NA	Microdilution	NA	>64	8	1	<=0.03	<=4	<=0.015	<=2	<=1	<=0.5	>32	>1024	<=8	8	<=0.25	4	8	0.06	0.12	<=0.03	4	<=0.12	<=0.015	32	1	blaCTX-M-1	NA	NA	NA	NA
16-AB03517	2016	BfR	Germany	Germany	Livestock	Turkeys	Meat	NA	0	NA	NA	Microdilution	NA	>64	8	2	<=0.03	<=4	<=0.015	<=2	<=1	<=0.5	>32	>1024	<=8	8	<=0.25	4	64	0.06	0.25	<=0.03	8	0.25	<=0.015	64	2	blaCTX-M-1	NA	NA	NA	NA
16-AB03520	2016	BfR	Germany	Germany	Livestock	Turkeys	Meat	NA	0	NA	NA	Microdilution	NA	>64	8	8	<=0.03	>128	0.25	<=2	<=1	1	>32	>1024	<=8	8	<=0.25	8	2	0.06	0.12	0.06	8	0.5	<=0.015	8	16	NA	blaTEM-20	NA	NA	NA
16-AB03522	2016	BfR	Germany	Germany	Livestock	Broiler_chickens	Meat	NA	0	NA	NA	Microdilution	NA	>64	8	8	<=0.03	<=4	<=0.015	<=2	<=1	<=0.5	<=0.25	<=8	<=8	8	<=0.25	64	0.25	8	4	<=0.03	8	<=0.12	0.03	8	8	NA	NA	NA	blaCMY-2	NA
16-AB03526	2016	BfR	Germany	Germany	Livestock	Broiler_chickens	Meat	NA	0	NA	NA	Microdilution	NA	>64	4	8	<=0.03	64	2	<=2	<=1	<=0.5	<=0.25	<=8	<=8	4	<=0.25	4	0.5	0.06	0.12	<=0.03	4	<=0.12	<=0.015	4	8	NA	NA	blaSHV-12	NA	NA
16-AB03527	2016	BfR	Germany	Germany	Livestock	Broiler_chickens	Meat	NA	0	NA	NA	Microdilution	NA	>64	8	2	<=0.03	>128	2	<=2	<=1	1	>32	>1024	128	8	<=0.25	8	16	0.06	0.5	<=0.03	8	<=0.12	<=0.015	64	1	blaCTX-M-1	NA	NA	NA	NA
16-AB03529	2016	BfR	Germany	Germany	Livestock	Turkeys	Meat	NA	0	NA	NA	Microdilution	NA	>64	4	16	<=0.03	<=4	<=0.015	64	4	<=0.5	<=0.25	>1024	32	4	<=0.25	4	0.5	0.06	0.12	<=0.03	4	<=0.12	<=0.015	4	16	NA	NA	blaSHV-12	NA	NA
16-AB03530	2016	BfR	Germany	Germany	Livestock	Turkeys	Meat	NA	0	NA	NA	Microdilution	NA	>64	4	16	<=0.03	<=4	<=0.015	64	<=1	<=0.5	<=0.25	>1024	32	4	<=0.25	4	0.5	0.06	0.12	<=0.03	8	<=0.12	<=0.015	4	16	NA	NA	blaSHV-12	NA	NA
16-AB03531	2016	BfR	Germany	Germany	Livestock	Turkeys	Meat	NA	0	NA	NA	Microdilution	NA	>64	8	4	<=0.03	<=4	0.25	<=2	<=1	<=0.5	<=0.25	>1024	64	4	<=0.25	8	32	0.06	0.12	<=0.03	8	<=0.12	<=0.015	64	8	blaCTX-M-1	NA	NA	NA	NA
16-AB03534	2016	BfR	Germany	Germany	Livestock	Turkeys	Meat	NA	0	NA	NA	Microdilution	NA	>64	8	16	<=0.03	<=4	<=0.015	<=2	<=1	<=0.5	<=0.25	>1024	64	4	<=0.25	4	2	0.06	0.12	<=0.03	8	<=0.12	<=0.015	16	64	NA	NA	blaSHV-12	NA	NA
16-AB03553	2016	BfR	Germany	Germany	Wild_animals	Wild_boars	Faeces/manure	NA	0	NA	NA	Microdilution	NA	>64	8	8	<=0.03	<=4	<=0.015	<=2	<=1	<=0.5	<=0.25	<=8	<=8	8	<=0.25	64	0.12	4	8	<=0.03	16	<=0.12	0.03	4	16	NA	NA	NA	blaCMY-2	NA
16-AB03607	2016	BfR	Germany	Germany	Livestock	Turkeys	Meat	NA	0	NA	NA	Microdilution	NA	>64	8	16	<=0.03	<=4	0.25	<=2	<=1	2	0.5	>1024	<=8	4	<=0.25	16	64	0.12	0.25	<=0.03	8	<=0.12	0.06	128	8	blaCTX-M-15	NA	NA	NA	NA
16-AB03608	2016	BfR	Germany	Germany	Livestock	Turkeys	Meat	NA	0	NA	NA	Microdilution	NA	>64	8	8	<=0.03	<=4	0.12	<=2	<=1	<=0.5	<=0.25	>1024	<=8	4	<=0.25	4	32	0.06	0.12	<=0.03	8	<=0.12	<=0.015	64	4	blaCTX-M-15	NA	NA	NA	NA
16-AB03615	2016	BfR	Germany	Germany	Livestock	Turkeys	Meat	NA	0	NA	NA	Microdilution	NA	>64	8	4	<=0.03	8	0.25	64	<=1	<=0.5	<=0.25	<=8	<=8	4	<=0.25	4	1	0.06	0.12	<=0.03	8	0.25	<=0.015	4	32	NA	blaTEM-52	NA	NA	NA
16-AB03616	2016	BfR	Germany	Germany	Livestock	Turkeys	Meat	NA	0	NA	NA	Microdilution	NA	>64	8	1	<=0.03	<=4	<=0.015	<=2	<=1	<=0.5	<=0.25	<=8	<=8	8	<=0.25	4	32	0.06	0.12	<=0.03	8	0.25	<=0.015	32	2	blaCTX-M-1	NA	NA	NA	NA
16-AB03617	2016	BfR	Germany	Germany	Livestock	Broiler_chickens	Meat	NA	0	NA	NA	Microdilution	NA	>64	8	8	<=0.03	<=4	<=0.015	<=2	<=1	<=0.5	<=0.25	<=8	<=8	8	<=0.25	64	0.25	4	4	<=0.03	8	0.25	0.03	16	8	NA	NA	NA	blaCMY-2	NA
16-AB03618	2016	BfR	Germany	Germany	Livestock	Broiler_chickens	Meat	NA	0	NA	NA	Microdilution	NA	>64	8	16	<=0.03	<=4	<=0.015	<=2	<=1	8	>32	>1024	<=8	8	<=0.25	128	0.5	16	16	<=0.03	16	0.25	0.06	32	16	NA	NA	NA	blaCMY-2	NA
16-AB03619	2016	BfR	Germany	Germany	Livestock	Turkeys	Meat	NA	0	NA	NA	Microdilution	NA	>64	8	1	<=0.03	>128	8	64	<=1	1	<=0.25	>1024	<=8	4	<=0.25	4	16	0.06	0.25	<=0.03	8	0.25	<=0.015	32	1	blaCTX-M-1	NA	NA	NA	NA
16-AB03620	2016	BfR	Germany	Germany	Livestock	Turkeys	Meat	NA	0	NA	NA	Microdilution	NA	>64	8	8	<=0.03	<=4	0.25	>64	<=1	<=0.5	<=0.25	>1024	128	4	<=0.25	16	8	0.06	0.12	<=0.03	8	<=0.12	0.06	64	8	blaCTX-M-15	NA	NA	NA	NA
16-AB03621	2016	BfR	Germany	Germany	Livestock	Turkeys	Meat	NA	0	NA	NA	Microdilution	NA	>64	8	2	<=0.03	8	0.25	<=2	<=1	<=0.5	<=0.25	>1024	32	4	<=0.25	4	1	0.06	0.12	<=0.03	4	<=0.12	0.03	4	2	NA	blaTEM-52	NA	NA	NA
16-AB03622	2016	BfR	Germany	Germany	Livestock	Turkeys	Meat	NA	0	NA	NA	Microdilution	NA	>64	8	16	<=0.03	<=4	<=0.015	<=2	<=1	<=0.5	<=0.25	<=8	<=8	8	<=0.25	8	16	0.06	0.25	<=0.03	8	0.25	<=0.015	128	16	blaCTX-M-15	NA	NA	NA	NA
16-AB03623	2016	BfR	Germany	Germany	Fruit_vegetables	Vegetables	Sprouts	NA	0	NA	NA	Microdilution	NA	>64	8	8	<=0.03	<=4	0.25	<=2	<=1	1	<=0.25	<=8	<=8	4	<=0.25	8	8	0.06	0.12	<=0.03	8	<=0.12	<=0.015	64	4	blaCTX-M-15	NA	NA	NA	NA
16-AB03636	2016	BfR	Germany	Germany	Livestock	Broiler_chickens	Faeces/manure	NA	0	NA	NA	Microdilution	NA	>64	8	8	<=0.03	>128	1	>64	<=1	1	>32	>1024	>128	32	<=0.25	8	2	0.06	0.12	<=0.03	8	<=0.12	<=0.015	8	8	NA	blaTEM-52	NA	NA	NA
16-AB03637	2016	BfR	Germany	Germany	Livestock	Broiler_chickens	Faeces/manure	NA	0	NA	NA	Microdilution	NA	>64	8	1	<=0.03	<=4	<=0.015	<=2	<=1	<=0.5	>32	>1024	<=8	4	<=0.25	4	8	0.06	0.12	<=0.03	4	<=0.12	<=0.015	32	2	blaCTX-M-1	NA	NA	NA	NA
16-AB03638	2016	BfR	Germany	Germany	Livestock	Broiler_chickens	Faeces/manure	NA	0	NA	NA	Microdilution	NA	>64	4	8	<=0.03	8	0.5	<=2	<=1	<=0.5	>32	>1024	<=8	4	<=0.25	4	0.25	0.06	0.12	<=0.03	4	<=0.12	<=0.015	1	16	NA	NA	blaSHV-12	NA	NA
16-AB03639	2016	BfR	Germany	Germany	Livestock	Broiler_chickens	Faeces/manure	NA	0	NA	NA	Microdilution	NA	>64	4	4	<=0.03	64	0.25	<=2	<=1	<=0.5	<=0.25	>1024	<=8	8	<=0.25	8	0.5	0.12	0.25	<=0.03	16	<=0.12	<=0.015	4	4	NA	blaTEM-52	NA	NA	NA
16-AB03647	2016	BfR	Germany	Germany	Livestock	Turkeys	Meat	NA	0	NA	NA	Microdilution	NA	>64	8	16	<=0.03	>128	>8	64	<=1	<=0.5	>32	>1024	<=8	8	<=0.25	128	0.25	8	4	<=0.03	8	0.25	0.03	16	8	NA	NA	NA	blaCMY-2	NA
16-AB03648	2016	BfR	Germany	Germany	Livestock	Turkeys	Meat	NA	0	NA	NA	Microdilution	NA	>64	8	1	<=0.03	<=4	<=0.015	>64	<=1	2	>32	>1024	<=8	8	<=0.25	4	8	0.06	0.12	<=0.03	4	<=0.12	<=0.015	64	2	blaCTX-M-1	NA	NA	NA	NA
16-AB03650	2016	BfR	Germany	Germany	Livestock	Broiler_chickens	Meat	NA	0	NA	NA	Microdilution	NA	>64	8	1	0.06	128	0.12	32	<=1	<=0.5	<=0.25	>1024	<=8	4	<=0.25	2	4	0.06	0.12	<=0.03	16	<=0.12	<=0.015	16	0.5	blaCTX-M-1	NA	NA	NA	NA
16-AB03651	2016	BfR	Germany	Germany	Livestock	Broiler_chickens	Meat	NA	0	NA	NA	Microdilution	NA	>64	4	16	<=0.03	<=4	0.25	64	<=1	1	<=0.25	<=8	<=8	8	<=0.25	4	0.25	0.06	0.12	<=0.03	8	<=0.12	<=0.015	4	8	NA	NA	blaSHV-12	NA	NA
16-AB03659	2016	BfR	Germany	Germany	Livestock	Turkeys	Meat	NA	0	NA	NA	Microdilution	NA	>64	8	16	<=0.03	>128	0.25	<=2	<=1	1	>32	>1024	<=8	8	<=0.25	8	4	0.06	0.12	<=0.03	8	<=0.12	<=0.015	16	64	NA	NA	blaSHV-12	NA	NA
16-AB03662	2016	BfR	Germany	Germany	Livestock	Broiler_chickens	Faeces/manure	NA	0	NA	NA	Microdilution	NA	>64	8	16	<=0.03	128	0.25	<=2	<=1	1	>32	>1024	<=8	8	<=0.25	4	2	0.06	0.12	<=0.03	8	0.25	<=0.015	16	64	NA	NA	blaSHV-12	NA	NA
16-AB03671	2016	BfR	Germany	Germany	Livestock	Broiler_chickens	Faeces/manure	NA	0	NA	NA	Microdilution	NA	>64	4	8	<=0.03	>128	>8	64	<=1	<=0.5	>32	>1024	<=8	8	<=0.25	4	0.5	0.06	0.12	<=0.03	4	<=0.12	<=0.015	4	8	NA	NA	blaSHV-12	NA	NA
16-AB03674	2016	BfR	Germany	Germany	Livestock	Broiler_chickens	Faeces/manure	NA	0	NA	NA	Microdilution	NA	>64	4	16	<=0.03	64	2	>64	<=1	<=0.5	>32	>1024	<=8	4	<=0.25	4	0.5	0.06	0.12	<=0.03	8	<=0.12	<=0.015	4	16	NA	NA	blaSHV-12	NA	NA
16-AB03675	2016	BfR	Germany	Germany	Livestock	Broiler_chickens	Meat	NA	0	NA	NA	Microdilution	NA	>64	4	16	<=0.03	<=4	<=0.015	64	<=1	<=0.5	<=0.25	>1024	32	8	<=0.25	4	0.5	0.06	0.12	<=0.03	16	<=0.12	<=0.015	4	16	NA	NA	blaSHV-12	NA	NA
16-AB03676	2016	BfR	Germany	Germany	Livestock	Broiler_chickens	Meat	NA	0	NA	NA	Microdilution	NA	>64	8	8	<=0.03	<=4	<=0.015	64	<=1	32	<=0.25	>1024	<=8	4	<=0.25	64	0.25	4	4	<=0.03	8	0.25	0.03	8	8	NA	NA	NA	blaCMY-2	NA
16-AB03677	2016	BfR	Germany	Germany	Livestock	Turkeys	Meat	NA	0	NA	NA	Microdilution	NA	>64	8	16	<=0.03	>128	>8	>64	<=1	<=0.5	<=0.25	<=8	<=8	8	0.5	8	8	0.12	0.25	<=0.03	16	<=0.12	<=0.015	64	8	blaCTX-M-15	NA	NA	NA	NA
16-AB03690	2016	BfR	Germany	Germany	Livestock	Broiler_chickens	Faeces/manure	NA	0	NA	NA	Microdilution	NA	>64	4	4	<=0.03	<=4	<=0.015	<=2	<=1	<=0.5	<=0.25	<=8	<=8	4	<=0.25	4	1	0.06	0.12	<=0.03	8	<=0.12	<=0.015	4	4	NA	blaTEM-52	NA	NA	NA
16-AB03694	2016	BfR	Germany	Germany	Wild_animals	Wild_boars	Faeces/manure	NA	0	NA	NA	Microdilution	NA	>64	8	16	<=0.03	<=4	<=0.015	<=2	<=1	<=0.5	<=0.25	16	<=8	4	<=0.25	4	64	0.06	0.12	<=0.03	4	<=0.12	<=0.015	128	8	blaCTX-M-15	NA	NA	NA	NA
16-AB03695	2016	BfR	Germany	Germany	Wild_animals	Wild_boars	Faeces/manure	NA	0	NA	NA	Microdilution	NA	>64	8	2	<=0.03	<=4	<=0.015	<=2	<=1	<=0.5	<=0.25	<=8	<=8	8	<=0.25	8	16	0.12	0.25	<=0.03	8	0.25	<=0.015	64	2	blaCTX-M-1	NA	NA	NA	NA
16-AB03696	2016	BfR	Germany	Germany	Wild_animals	Wild_boars	Faeces/manure	NA	0	NA	NA	Microdilution	NA	>64	8	8	<=0.03	8	0.5	>64	<=1	<=0.5	>32	>1024	16	16	0.5	4	16	0.06	0.25	<=0.03	8	<=0.12	<=0.015	64	8	blaCTX-M-15	NA	NA	NA	NA
16-AB03697	2016	BfR	Germany	Germany	Wild_animals	Wild_boars	Faeces/manure	NA	0	NA	NA	Microdilution	NA	>64	8	8	<=0.03	<=4	0.03	64	<=1	<=0.5	<=0.25	16	<=8	8	<=0.25	4	32	0.06	0.25	<=0.03	4	0.25	0.03	128	8	blaCTX-M-15	NA	NA	NA	NA
16-AB03698	2016	BfR	Germany	Germany	Wild_animals	Wild_boars	Faeces/manure	NA	0	NA	NA	Microdilution	NA	>64	8	16	<=0.03	>128	>8	>64	<=1	1	>32	>1024	<=8	8	<=0.25	8	64	0.12	0.25	<=0.03	16	0.25	0.03	128	16	blaCTX-M-1	NA	NA	NA	NA
16-AB03699	2016	BfR	Germany	Germany	Wild_animals	Wild_boars	Faeces/manure	NA	0	NA	NA	Microdilution	NA	>64	8	1	<=0.03	<=4	<=0.015	<=2	<=1	8	<=0.25	<=8	<=8	8	<=0.25	4	32	0.06	0.12	<=0.03	4	<=0.12	<=0.015	64	1	blaCTX-M-1	NA	NA	NA	NA
16-AB03700	2016	BfR	Germany	Germany	Wild_animals	Wild_boars	Faeces/manure	NA	0	NA	NA	Microdilution	NA	>64	8	0.5	<=0.03	<=4	<=0.015	<=2	<=1	16	<=0.25	16	<=8	4	<=0.25	4	32	0.06	0.12	<=0.03	8	0.25	<=0.015	32	1	blaCTX-M-1	NA	NA	NA	NA
16-AB03701	2016	BfR	Germany	Germany	Wild_animals	Wild_boars	Faeces/manure	NA	0	NA	NA	Microdilution	NA	>64	8	1	<=0.03	<=4	<=0.015	<=2	<=1	<=0.5	<=0.25	<=8	<=8	8	<=0.25	4	8	0.06	0.12	<=0.03	8	0.25	<=0.015	64	1	blaCTX-M-1	NA	NA	NA	NA
16-AB03702	2016	BfR	Germany	Germany	Wild_animals	Wild_boars	Faeces/manure	NA	0	NA	NA	Microdilution	NA	>64	8	1	<=0.03	<=4	<=0.015	<=2	<=1	<=0.5	0.5	16	<=8	8	<=0.25	8	4	0.06	0.12	<=0.03	8	0.25	<=0.015	64	1	blaCTX-M-14	NA	NA	NA	NA
16-AB03703	2016	BfR	Germany	Germany	Wild_animals	Wild_boars	Faeces/manure	NA	0	NA	NA	Microdilution	NA	>64	8	1	<=0.03	8	0.5	>64	<=1	1	<=0.25	16	>128	8	0.5	4	4	0.06	0.12	<=0.03	8	0.25	<=0.015	64	1	blaCTX-M-65	NA	NA	NA	NA
17/28532/ECX	2017	INIAV	Portugal	Portugal	Livestock	Pigs	Other	Cecal contents	0	NA	NA	Microdilution	NA	>64	>4	>8	0.06	<=4	0.06	>64	<=1	1	>32	>1024	<=8	8	0.5	>64	1	32	16	0.06	8	0.25	0.25	32	32	NA	NA	NA	blaCMY-2	NA
17008/ECX	2015	INIAV	Portugal	Portugal	Livestock	Pigs	Other	Cecal contents	0	NA	NA	Others (specify in next column)	Agar dilution Panel 1 and microdilution Panel 2	>64	>4	2	<=0.03	8	0.12	>64	16	1	<=0.25	>1024	128	8	0.5	4	4	<=0.06	<=0.12	<=0.03	4	0.25	<=0.015	32	4	blaCTX-M-1	NA	NA	NA	NA
17162/ECX	2015	INIAV	Portugal	Portugal	Livestock	Pigs	Other	Cecal contents	0	NA	NA	Others (specify in next column)	Agar dilution Panel 1 and microdilution Panel 2	>64	>4	2	<=0.03	<=4	<=0.015	>64	16	<=0.5	0.5	16	<=8	8	0.5	4	8	0.125	0.25	<=0.03	4	0.25	<=0.015	64	2	blaCTX-M-14	NA	NA	NA	NA
17890/ECX	2015	INIAV	Portugal	Portugal	Livestock	Pigs	Other	Cecal contents	0	NA	NA	Others (specify in next column)	Agar dilution Panel 1 and microdilution Panel 2	>64	>4	1	<=0.03	>128	>8	>64	8	<=0.5	>32	>1024	>128	>64	0.5	4	8	<=0.06	<=0.12	<=0.03	4	0.25	<=0.015	16	2	blaCTX-M-1	NA	NA	NA	NA
17-AB00019	2017	BfR	Germany	Germany	Livestock	Turkeys	Other	Sample taken from the caecum	0	NA	NA	Microdilution	NA	>64	8	0.5	<=0.03	<=4	<=0.015	<=2	<=1	<=0.5	<=0.25	<=8	<=8	4	<=0.25	4	4	0.06	0.12	<=0.03	4	<=0.12	<=0.015	16	0.5	blaCTX-M-1	NA	NA	NA	NA
17-AB00020	2017	BfR	Germany	Germany	Livestock	Broiler_chickens	Other	Sample taken from the caecum	0	NA	NA	Microdilution	NA	>64	8	8	<=0.03	<=4	<=0.015	<=2	<=1	<=0.5	<=0.25	16	<=8	8	<=0.25	4	2	0.06	0.25	<=0.03	8	0.25	<=0.015	8	8	NA	blaTEM-52	NA	NA	NA
17-AB00021	2017	BfR	Germany	Germany	Livestock	Turkeys	Other	Sample taken from the caecum	0	NA	NA	Microdilution	NA	>64	8	16	<=0.03	<=4	<=0.015	<=2	<=1	<=0.5	<=0.25	<=8	<=8	8	<=0.25	4	16	0.12	0.25	<=0.03	8	0.25	<=0.015	128	8	blaCTX-M-15	NA	NA	NA	NA
17-AB00022	2017	BfR	Germany	Germany	Livestock	Turkeys	Other	Sample taken from the caecum	0	NA	NA	Microdilution	NA	>64	8	16	<=0.03	<=4	<=0.015	<=2	<=1	<=0.5	<=0.25	<=8	<=8	8	<=0.25	4	16	0.12	0.12	<=0.03	8	0.25	<=0.015	64	8	blaCTX-M-15	NA	NA	NA	NA
17-AB00027	2017	BfR	Germany	Germany	Livestock	Turkeys	Meat	NA	0	NA	NA	Microdilution	NA	>64	8	1	<=0.03	<=4	<=0.015	<=2	<=1	<=0.5	<=0.25	32	<=8	4	<=0.25	4	16	0.06	0.12	<=0.03	4	0.25	<=0.015	64	1	blaCTX-M-1	NA	NA	NA	NA
17-AB00034	2017	BfR	Germany	Germany	Livestock	Broiler_chickens	Faeces/manure	NA	0	NA	NA	Microdilution	NA	>64	8	8	<=0.03	>128	>8	>64	<=1	<=0.5	0.5	>1024	<=8	16	0.5	32	8	0.12	0.25	<=0.03	32	<=0.12	<=0.015	128	8	blaCTX-M-15	NA	NA	NA	NA
17-AB00046	2017	BfR	Germany	Germany	Livestock	Broiler_chickens	Other	Sample taken from the caecum	0	NA	NA	Microdilution	NA	>64	8	8	<=0.03	<=4	<=0.015	<=2	<=1	<=0.5	<=0.25	16	<=8	8	<=0.25	64	0.12	4	8	<=0.03	16	0.25	0.03	8	8	NA	NA	NA	blaCMY-2	NA
17-AB00047	2017	BfR	Germany	Germany	Livestock	Broiler_chickens	Other	Sample taken from the caecum	0	NA	NA	Microdilution	NA	>64	2	8	<=0.03	8	0.25	<=2	<=1	<=0.5	<=0.25	>1024	<=8	4	<=0.25	4	0.25	0.06	0.12	<=0.03	4	<=0.12	<=0.015	1	8	NA	NA	blaSHV-12	NA	NA
17-AB00048	2017	BfR	Germany	Germany	Livestock	Broiler_chickens	Other	Sample taken from the caecum	0	NA	NA	Microdilution	NA	>64	4	4	<=0.03	64	0.12	<=2	<=1	<=0.5	<=0.25	16	16	8	<=0.25	8	0.5	0.12	0.25	<=0.03	16	<=0.12	<=0.015	4	4	NA	blaTEM-52	NA	NA	NA
17-AB00049	2017	BfR	Germany	Germany	Livestock	Broiler_chickens	Other	Sample taken from the caecum	0	NA	NA	Microdilution	NA	>64	8	8	<=0.03	>128	0.5	<=2	<=1	<=0.5	<=0.25	<=8	<=8	8	<=0.25	64	0.25	8	4	<=0.03	8	0.25	0.03	8	16	NA	NA	NA	blaCMY-2	NA
17-AB00050	2017	BfR	Germany	Germany	Livestock	Broiler_chickens	Other	Sample taken from the caecum	0	NA	NA	Microdilution	NA	>64	4	16	<=0.03	<=4	0.5	<=2	<=1	8	<=0.25	>1024	<=8	4	<=0.25	8	0.5	0.06	0.12	<=0.03	8	<=0.12	<=0.015	4	8	NA	NA	blaSHV-12	NA	NA
17-AB00061	2017	BfR	Germany	Germany	Livestock	Broiler_chickens	Faeces/manure	NA	0	NA	NA	Microdilution	NA	>64	8	1	<=0.03	128	0.25	>64	<=1	<=0.5	>32	>1024	>128	4	<=0.25	8	4	0.06	0.12	<=0.03	4	<=0.12	<=0.015	32	1	blaCTX-M-1	NA	NA	NA	NA
17-AB00063	2017	BfR	Germany	Germany	Livestock	Broiler_chickens	Faeces/manure	NA	0	NA	NA	Microdilution	NA	>64	8	1	<=0.03	128	0.25	>64	<=1	<=0.5	>32	>1024	>128	4	<=0.25	8	8	0.06	0.25	<=0.03	8	<=0.12	0.03	64	1	blaCTX-M-1	NA	NA	NA	NA
17-AB00067	2017	BfR	Germany	Germany	Livestock	Broiler_chickens	Faeces/manure	NA	0	NA	NA	Microdilution	NA	>64	4	4	<=0.03	<=4	0.03	<=2	<=1	<=0.5	<=0.25	>1024	<=8	8	<=0.25	16	0.5	0.06	0.12	<=0.03	8	<=0.12	<=0.015	4	4	NA	blaTEM-106	NA	NA	NA
17-AB00071	2017	BfR	Germany	Germany	Livestock	Broiler_chickens	Faeces/manure	NA	0	NA	NA	Microdilution	NA	>64	8	8	<=0.03	<=4	<=0.015	>64	<=1	<=0.5	>32	>1024	<=8	8	<=0.25	4	0.5	0.06	0.12	<=0.03	8	<=0.12	<=0.015	8	8	NA	blaTEM-52	NA	NA	NA
17-AB00074	2017	BfR	Germany	Germany	Livestock	Broiler_chickens	Faeces/manure	NA	0	NA	NA	Microdilution	NA	>64	8	8	<=0.03	<=4	<=0.015	<=2	<=1	<=0.5	<=0.25	<=8	<=8	4	<=0.25	64	0.25	4	4	<=0.03	4	<=0.12	0.03	8	8	NA	NA	NA	blaCMY-2	NA
17-AB00076	2017	BfR	Germany	Germany	Livestock	Broiler_chickens	Faeces/manure	NA	0	NA	NA	Microdilution	NA	>64	8	1	<=0.03	64	0.25	<=2	<=1	<=0.5	>32	>1024	<=8	8	<=0.25	4	4	0.06	0.12	<=0.03	8	<=0.12	<=0.015	32	1	blaCTX-M-1	NA	NA	NA	NA
17-AB00078	2017	BfR	Germany	Germany	Livestock	Broiler_chickens	Faeces/manure	NA	0	NA	NA	Microdilution	NA	>64	2	8	<=0.03	64	0.25	<=2	<=1	<=0.5	>32	>1024	16	4	<=0.25	8	0.5	0.06	0.12	<=0.03	4	<=0.12	<=0.015	2	16	NA	NA	blaSHV-12	NA	NA
17-AB00079	2017	BfR	Germany	Germany	Livestock	Broiler_chickens	Faeces/manure	NA	0	NA	NA	Microdilution	NA	>64	8	16	0.06	<=4	<=0.015	>64	<=1	>32	>32	>1024	<=8	4	<=0.25	128	0.5	16	16	0.06	16	0.5	0.25	16	16	NA	NA	NA	blaCMY-2	NA
17-AB00080	2017	BfR	Germany	Germany	Livestock	Broiler_chickens	Faeces/manure	NA	0	NA	NA	Microdilution	NA	>64	2	1	<=0.03	<=4	0.03	<=2	<=1	<=0.5	<=0.25	<=8	<=8	4	<=0.25	8	0.25	0.06	0.12	<=0.03	8	<=0.12	<=0.015	1	2	NA	blaTEM-52	NA	NA	NA
17-AB00082	2017	BfR	Germany	Germany	Livestock	Broiler_chickens	Faeces/manure	NA	0	NA	NA	Microdilution	NA	>64	2	1	<=0.03	>128	8	<=2	<=1	<=0.5	>32	>1024	>128	8	<=0.25	4	0.25	0.06	0.12	<=0.03	8	0.25	<=0.015	1	2	NA	blaTEM-52	NA	NA	NA
17-AB00086	2017	BfR	Germany	Germany	Livestock	Broiler_chickens	Faeces/manure	NA	0	NA	NA	Microdilution	NA	>64	8	8	<=0.03	<=4	<=0.015	<=2	<=1	<=0.5	<=0.25	<=8	<=8	4	<=0.25	32	0.25	4	4	<=0.03	4	0.25	0.03	8	8	NA	NA	NA	blaCMY-2	NA
17-AB00109	2017	BfR	Germany	Germany	Livestock	Broiler_chickens	Other	Sample taken from the caecum	0	NA	NA	Microdilution	NA	>64	2	2	<=0.03	>128	1	4	<=1	8	<=0.25	<=8	>128	8	<=0.25	8	0.25	0.06	0.12	<=0.03	8	0.25	<=0.015	2	2	NA	blaTEM-52	NA	NA	NA
17-AB00110	2017	BfR	Germany	Germany	Livestock	Broiler_chickens	Other	Sample taken from the caecum	0	NA	NA	Microdilution	NA	>64	8	16	<=0.03	>128	8	>64	<=1	>32	<=0.25	>1024	<=8	4	<=0.25	64	0.5	16	4	<=0.03	8	<=0.12	0.06	8	16	NA	NA	NA	blaCMY-2	NA
17-AB00115	2017	BfR	Germany	Germany	Livestock	Broiler_chickens	Other	Sample taken from the caecum	0	NA	NA	Microdilution	NA	>64	2	2	<=0.03	<=4	<=0.015	<=2	<=1	<=0.5	>32	>1024	<=8	8	<=0.25	8	0.5	0.06	0.12	<=0.03	8	0.25	<=0.015	2	2	NA	blaTEM-52	NA	NA	NA
17-AB00178	2017	BfR	Germany	Germany	Wild_animals	Wild_boars	Faeces/manure	NA	0	NA	NA	Microdilution	NA	>64	8	1	<=0.03	<=4	0.25	64	<=1	>32	<=0.25	<=8	128	8	<=0.25	4	4	0.06	0.25	0.06	8	0.25	<=0.015	32	1	blaCTX-M-14	NA	NA	NA	NA
17-AB00195	2017	BfR	Germany	Germany	Wild_animals	Wild_boars	Faeces/manure	NA	0	NA	NA	Microdilution	NA	>64	8	1	<=0.03	<=4	<=0.015	<=2	<=1	<=0.5	<=0.25	<=8	<=8	4	<=0.25	4	8	0.06	0.12	<=0.03	4	<=0.12	<=0.015	32	1	blaCTX-M-1	NA	NA	NA	NA
17-AB00200	2017	BfR	Germany	Germany	Wild_animals	Wild_boars	Faeces/manure	NA	0	NA	NA	Microdilution	NA	>64	8	2	<=0.03	<=4	<=0.015	<=2	<=1	<=0.5	<=0.25	<=8	<=8	4	<=0.25	4	16	0.06	0.12	<=0.03	4	<=0.12	<=0.015	32	2	blaCTX-M-1	NA	NA	NA	NA
17-AB00276	2017	BfR	Germany	Germany	Livestock	Broiler_chickens	Faeces/manure	NA	0	NA	NA	Microdilution	NA	>64	8	2	<=0.03	>128	2	4	<=1	<=0.5	<=0.25	>1024	16	8	<=0.25	16	32	0.12	0.25	<=0.03	8	0.25	0.03	64	2	blaCTX-M-1	NA	NA	NA	NA
17-AB00286	2017	BfR	Germany	Germany	Livestock	Broiler_chickens	Faeces/manure	NA	0	NA	NA	Microdilution	NA	>64	8	16	<=0.03	>128	0.5	<=2	<=1	<=0.5	<=0.25	16	<=8	4	<=0.25	128	0.25	8	4	<=0.03	8	0.25	0.06	8	16	NA	NA	NA	blaCMY-2	NA
17-AB00287	2017	BfR	Germany	Germany	Livestock	Broiler_chickens	Faeces/manure	NA	0	NA	NA	Microdilution	NA	>64	8	1	<=0.03	>128	0.25	>64	<=1	<=0.5	<=0.25	>1024	<=8	8	<=0.25	4	4	0.06	0.25	<=0.03	8	0.25	<=0.015	16	1	blaCTX-M-1	NA	NA	NA	NA
17-AB00288	2017	BfR	Germany	Germany	Livestock	Broiler_chickens	Meat	NA	0	NA	NA	Microdilution	NA	>64	8	2	<=0.03	>128	0.5	<=2	<=1	<=0.5	<=0.25	>1024	<=8	8	<=0.25	8	8	0.06	0.12	<=0.03	4	0.25	<=0.015	64	2	blaCTX-M-1	NA	NA	NA	NA
17-AB00294	2017	BfR	Germany	Germany	Livestock	Broiler_chickens	Faeces/manure	NA	0	NA	NA	Microdilution	NA	>64	8	1	<=0.03	<=4	<=0.015	>64	<=1	<=0.5	>32	>1024	<=8	8	<=0.25	4	8	0.06	0.12	<=0.03	8	<=0.12	<=0.015	16	1	blaCTX-M-1	NA	NA	NA	NA
17-AB00298	2017	BfR	Germany	Germany	Livestock	Broiler_chickens	Other	Sample taken from the caecum	0	NA	NA	Microdilution	NA	>64	8	0.5	<=0.03	64	0.25	32	<=1	1	<=0.25	>1024	<=8	<=2	<=0.25	2	2	0.06	0.12	<=0.03	4	<=0.12	<=0.015	32	0.5	blaCTX-M-1	NA	NA	NA	NA
17-AB00299	2017	BfR	Germany	Germany	Livestock	Broiler_chickens	Other	Sample taken from the caecum	0	NA	NA	Microdilution	NA	>64	4	8	<=0.03	>128	2	<=2	<=1	<=0.5	<=0.25	>1024	<=8	4	<=0.25	4	0.25	0.06	0.12	<=0.03	4	<=0.12	<=0.015	2	8	NA	NA	blaSHV-12	NA	NA
17-AB00302	2017	BfR	Germany	Germany	Livestock	Broiler_chickens	Other	Sample taken from the caecum	0	NA	NA	Microdilution	NA	>64	8	16	<=0.03	>128	>8	4	<=1	<=0.5	0.5	<=8	16	16	0.5	32	1	0.12	0.25	<=0.03	16	0.25	<=0.015	8	16	NA	NA	blaSHV-12	NA	NA
17-AB00304	2017	BfR	Germany	Germany	Livestock	Broiler_chickens	Other	Sample taken from the caecum	0	NA	NA	Microdilution	NA	>64	8	1	<=0.03	64	0.12	>64	<=1	<=0.5	<=0.25	>1024	<=8	4	<=0.25	4	16	0.06	0.12	<=0.03	4	0.25	<=0.015	32	1	blaCTX-M-1	NA	NA	NA	NA
17-AB00306	2017	BfR	Germany	Germany	Livestock	Broiler_chickens	Other	Sample taken from the caecum	0	NA	NA	Microdilution	NA	>64	8	8	<=0.03	<=4	0.25	64	<=1	<=0.5	>32	>1024	<=8	4	<=0.25	4	16	0.06	0.12	<=0.03	4	0.25	<=0.015	64	8	blaCTX-M-15	NA	NA	NA	NA
17-AB00308	2017	BfR	Germany	Germany	Livestock	Broiler_chickens	Other	Sample taken from the caecum	0	NA	NA	Microdilution	NA	>64	4	16	<=0.03	8	0.5	>64	<=1	<=0.5	>32	>1024	<=8	4	0.5	4	0.5	0.06	0.12	<=0.03	8	0.5	<=0.015	8	16	NA	NA	blaSHV-12	NA	NA
17-AB00311	2017	BfR	Germany	Germany	Livestock	Turkeys	Other	Sample taken from the caecum	0	NA	NA	Microdilution	NA	>64	8	1	<=0.03	<=4	<=0.015	<=2	<=1	<=0.5	<=0.25	<=8	128	8	<=0.25	8	16	0.06	0.12	<=0.03	4	<=0.12	<=0.015	16	0.5	blaCTX-M-1	NA	NA	NA	NA
17-AB00315	2017	BfR	Germany	Germany	Wild_animals	Wild_boars	Faeces/manure	NA	0	NA	NA	Microdilution	NA	>64	8	16	<=0.03	8	0.25	64	<=1	<=0.5	>32	>1024	<=8	8	<=0.25	8	64	0.06	0.12	<=0.03	8	<=0.12	0.03	128	8	blaCTX-M-1	NA	NA	NA	NA
17-AB00336	2017	BfR	Germany	Germany	Livestock	Turkeys	Other	Sample taken from the caecum	0	NA	NA	Microdilution	NA	>64	4	16	<=0.03	<=4	0.25	16	<=1	16	<=0.25	>1024	<=8	4	<=0.25	4	0.5	0.06	0.12	<=0.03	4	<=0.12	<=0.015	2	8	NA	NA	blaSHV-12	NA	NA
17-AB00354	2017	BfR	Germany	Germany	Livestock	Broiler_chickens	Other	Sample taken from the caecum	0	NA	NA	Microdilution	NA	>64	8	2	<=0.03	>128	0.25	<=2	<=1	<=0.5	<=0.25	>1024	<=8	8	<=0.25	4	16	0.06	0.12	<=0.03	4	<=0.12	<=0.015	64	2	blaCTX-M-15	NA	NA	NA	NA
17-AB00361	2017	BfR	Germany	Germany	Livestock	Cattle	Meat	NA	0	NA	NA	Microdilution	NA	>64	8	4	<=0.03	>128	>8	>64	<=1	<=0.5	>32	>1024	64	16	<=0.25	8	16	0.06	0.12	<=0.03	4	0.25	<=0.015	64	4	blaCTX-M-15	NA	NA	NA	NA
17-AB00362	2017	BfR	Germany	Germany	Livestock	Cattle	Meat	NA	0	NA	NA	Microdilution	NA	>64	8	1	<=0.03	<=4	<=0.015	<=2	<=1	<=0.5	<=0.25	<=8	<=8	4	<=0.25	4	8	0.06	0.12	<=0.03	8	0.25	<=0.015	32	1	blaCTX-M-1	NA	NA	NA	NA
17-AB00378	2017	BfR	Germany	Germany	Livestock	Pigs	Faeces/manure	NA	0	NA	NA	Microdilution	NA	>64	8	1	<=0.03	<=4	<=0.015	<=2	<=1	<=0.5	>32	>1024	<=8	4	<=0.25	2	16	0.06	0.12	0.06	4	0.5	<=0.015	32	1	blaCTX-M-1	NA	NA	NA	NA
17-AB00426	2017	BfR	Germany	Germany	Livestock	Pigs	Faeces/manure	NA	0	NA	NA	Microdilution	NA	>64	8	1	<=0.03	<=4	<=0.015	<=2	<=1	<=0.5	>32	>1024	<=8	4	<=0.25	4	32	0.06	0.25	<=0.03	4	<=0.12	<=0.015	64	2	blaCTX-M-1	NA	NA	NA	NA
17-AB00427	2017	BfR	Germany	Germany	Livestock	Pigs	Faeces/manure	NA	0	NA	NA	Microdilution	NA	>64	8	2	<=0.03	<=4	0.03	>64	<=1	1	<=0.25	>1024	<=8	>64	1	16	8	0.12	0.5	<=0.03	16	<=0.12	<=0.015	32	4	blaCTX-M-1	NA	NA	NA	NA
17-AB00428	2017	BfR	Germany	Germany	Livestock	Pigs	Faeces/manure	NA	0	NA	NA	Microdilution	NA	>64	8	1	<=0.03	<=4	<=0.015	<=2	<=1	<=0.5	<=0.25	>1024	<=8	64	<=0.25	4	4	0.06	0.12	<=0.03	8	0.25	<=0.015	16	1	blaCTX-M-1	NA	NA	NA	NA
17-AB00429	2017	BfR	Germany	Germany	Livestock	Pigs	Faeces/manure	NA	0	NA	NA	Microdilution	NA	>64	8	1	<=0.03	<=4	<=0.015	<=2	<=1	<=0.5	>32	>1024	<=8	8	<=0.25	4	8	0.06	0.25	<=0.03	8	0.25	<=0.015	32	2	blaCTX-M-1	NA	NA	NA	NA
17-AB00430	2017	BfR	Germany	Germany	Livestock	Cattle	Faeces/manure	NA	0	NA	NA	Microdilution	NA	>64	8	2	<=0.03	<=4	<=0.015	>64	<=1	<=0.5	<=0.25	<=8	<=8	8	<=0.25	4	8	0.06	0.25	<=0.03	8	<=0.12	<=0.015	32	2	blaCTX-M-1	NA	NA	NA	NA
17-AB00431	2017	BfR	Germany	Germany	Livestock	Cattle	Faeces/manure	NA	0	NA	NA	Microdilution	NA	>64	8	1	0.06	>128	>8	>64	<=1	<=0.5	>32	>1024	>128	16	0.5	8	8	0.06	0.25	<=0.03	8	<=0.12	0.03	32	2	blaCTX-M-14	NA	NA	NA	NA
17-AB00432	2017	BfR	Germany	Germany	Livestock	Cattle	Faeces/manure	NA	0	NA	NA	Microdilution	NA	>64	8	16	<=0.03	>128	>8	>64	<=1	2	>32	>1024	<=8	16	<=0.25	4	32	0.06	0.25	<=0.03	8	<=0.12	<=0.015	64	16	blaCTX-M-15	NA	NA	NA	NA
17-AB00433	2017	BfR	Germany	Germany	Livestock	Cattle	Faeces/manure	NA	0	NA	NA	Microdilution	NA	>64	8	2	<=0.03	>128	0.25	<=2	<=1	32	>32	>1024	>128	8	<=0.25	4	4	0.06	0.12	<=0.03	8	0.25	<=0.015	32	2	blaCTX-M-1	NA	NA	NA	NA
17-AB00434	2017	BfR	Germany	Germany	Livestock	Cattle	Faeces/manure	NA	0	NA	NA	Microdilution	NA	>64	8	1	<=0.03	>128	0.12	64	<=1	>32	>32	>1024	>128	8	0.5	4	16	0.06	0.12	<=0.03	4	0.25	<=0.015	32	1	blaCTX-M-1	NA	NA	NA	NA
17-AB00435	2017	BfR	Germany	Germany	Livestock	Cattle	Faeces/manure	NA	0	NA	NA	Microdilution	NA	>64	8	2	<=0.03	128	0.12	>64	<=1	32	>32	>1024	>128	8	0.5	4	8	0.06	0.12	<=0.03	8	0.25	<=0.015	32	2	blaCTX-M-1	NA	NA	NA	NA
17-AB00436	2017	BfR	Germany	Germany	Livestock	Cattle	Faeces/manure	NA	0	NA	NA	Microdilution	NA	64	8	4	<=0.03	>128	1	>64	<=1	16	>32	>1024	>128	16	<=0.25	16	64	0.12	0.25	0.06	8	0.25	0.25	128	4	blaCTX-M-1	NA	NA	NA	NA
17-AB00460	2017	BfR	Germany	Germany	Livestock	Pigs	Faeces/manure	NA	0	NA	NA	Microdilution	NA	>64	2	1	0.06	<=4	<=0.015	<=2	<=1	<=0.5	<=0.25	<=8	<=8	8	<=0.25	4	0.25	0.06	0.12	<=0.03	8	0.25	<=0.015	1	1	NA	blaTEM-52	NA	NA	NA
17-AB00461	2017	BfR	Germany	Germany	Wild_animals	Deer	Meat	NA	0	NA	NA	Microdilution	NA	>64	8	0.5	<=0.03	<=4	<=0.015	>64	<=1	<=0.5	>32	>1024	<=8	8	0.5	4	2	0.06	0.12	<=0.03	8	<=0.12	<=0.015	16	0.5	blaCTX-M-14	NA	NA	NA	NA
17-AB00477	2017	BfR	Germany	Germany	Livestock	Pigs	Faeces/manure	NA	0	NA	NA	Microdilution	NA	>64	8	1	<=0.03	<=4	<=0.015	>64	<=1	8	<=0.25	<=8	<=8	4	<=0.25	4	16	0.06	0.12	<=0.03	4	<=0.12	<=0.015	64	1	blaCTX-M-1	NA	NA	NA	NA
17-AB00507	2017	BfR	Germany	Germany	Livestock	Cattle	Faeces/manure	NA	0	NA	NA	Microdilution	NA	>64	8	1	<=0.03	<=4	<=0.015	>64	<=1	1	>32	>1024	16	8	<=0.25	4	16	0.06	0.12	<=0.03	4	0.25	<=0.015	32	1	blaCTX-M-1	NA	NA	NA	NA
17-AB00508	2017	BfR	Germany	Germany	Livestock	Cattle	Faeces/manure	NA	0	NA	NA	Microdilution	NA	>64	8	1	<=0.03	<=4	<=0.015	>64	<=1	<=0.5	>32	>1024	16	8	<=0.25	4	16	0.12	0.25	<=0.03	8	0.25	<=0.015	32	1	blaCTX-M-1	NA	NA	NA	NA
17-AB00509	2017	BfR	Germany	Germany	Livestock	Cattle	Faeces/manure	NA	0	NA	NA	Microdilution	NA	>64	8	1	<=0.03	<=4	<=0.015	>64	<=1	<=0.5	>32	>1024	16	8	0.5	8	16	0.06	0.12	<=0.03	8	0.25	<=0.015	64	2	blaCTX-M-1	NA	NA	NA	NA
17-AB00510	2017	BfR	Germany	Germany	Livestock	Cattle	Faeces/manure	NA	0	NA	NA	Microdilution	NA	>64	8	1	<=0.03	<=4	<=0.015	>64	<=1	<=0.5	>32	>1024	16	8	<=0.25	4	16	0.06	0.12	<=0.03	8	0.25	<=0.015	32	1	blaCTX-M-1	NA	NA	NA	NA
17-AB00512	2017	BfR	Germany	Germany	Livestock	Pigs	Faeces/manure	NA	0	NA	NA	Microdilution	NA	>64	8	1	<=0.03	<=4	<=0.015	<=2	<=1	>32	<=0.25	<=8	128	8	<=0.25	4	8	0.06	0.12	<=0.03	4	<=0.12	<=0.015	32	2	blaCTX-M-14	NA	NA	NA	NA
17-AB00513	2017	BfR	Germany	Germany	Livestock	Pigs	Faeces/manure	NA	0	NA	NA	Microdilution	NA	>64	8	1	<=0.03	128	0.25	>64	<=1	<=0.5	<=0.25	<=8	<=8	8	<=0.25	4	32	0.06	0.12	<=0.03	8	<=0.12	<=0.015	32	1	blaCTX-M-1	NA	NA	NA	NA
17-AB00514	2017	BfR	Germany	Germany	Livestock	Pigs	Faeces/manure	NA	0	NA	NA	Microdilution	NA	>64	8	1	<=0.03	<=4	<=0.015	<=2	<=1	<=0.5	<=0.25	<=8	<=8	4	0.5	8	16	0.06	0.25	<=0.03	8	0.25	<=0.015	64	1	blaCTX-M-1	NA	NA	NA	NA
17-AB00515	2017	BfR	Germany	Germany	Livestock	Pigs	Faeces/manure	NA	0	NA	NA	Microdilution	NA	>64	8	1	<=0.03	>128	>8	64	<=1	>32	<=0.25	>1024	<=8	32	<=0.25	4	16	0.06	0.12	<=0.03	8	0.25	<=0.015	32	1	blaCTX-M-1	NA	NA	NA	NA
17-AB00517	2017	BfR	Germany	Germany	Livestock	Cattle	Faeces/manure	NA	0	NA	NA	Microdilution	NA	>64	8	1	<=0.03	<=4	<=0.015	<=2	<=1	<=0.5	<=0.25	>1024	<=8	>64	<=0.25	4	4	0.06	0.12	<=0.03	8	0.25	<=0.015	16	1	blaCTX-M-1	NA	NA	NA	NA
17-AB00518	2017	BfR	Germany	Germany	Livestock	Cattle	Faeces/manure	NA	0	NA	NA	Microdilution	NA	>64	8	1	<=0.03	<=4	<=0.015	<=2	<=1	<=0.5	0.5	>1024	<=8	>64	<=0.25	4	4	0.06	0.12	<=0.03	8	0.25	<=0.015	16	1	blaCTX-M-1	NA	NA	NA	NA
17-AB00519	2017	BfR	Germany	Germany	Livestock	Cattle	Faeces/manure	NA	0	NA	NA	Microdilution	NA	>64	8	1	<=0.03	<=4	<=0.015	<=2	<=1	<=0.5	<=0.25	>1024	<=8	>64	<=0.25	8	4	0.06	0.25	<=0.03	8	0.25	<=0.015	8	1	blaCTX-M-1	NA	NA	NA	NA
17-AB00520	2017	BfR	Germany	Germany	Livestock	Cattle	Faeces/manure	NA	0	NA	NA	Microdilution	NA	>64	8	1	<=0.03	>128	>8	>64	<=1	<=0.5	>32	>1024	128	16	<=0.25	8	16	0.06	0.12	<=0.03	8	0.25	<=0.015	64	1	blaCTX-M-14	NA	NA	NA	NA
17-AB00521	2017	BfR	Germany	Germany	Livestock	Cattle	Faeces/manure	NA	0	NA	NA	Microdilution	NA	>64	8	2	<=0.03	<=4	<=0.015	<=2	<=1	<=0.5	1	>1024	128	32	<=0.25	8	16	0.06	0.5	<=0.03	16	0.25	0.03	64	4	blaCTX-M-1	NA	NA	NA	NA
17-AB00522	2017	BfR	Germany	Germany	Livestock	Cattle	Faeces/manure	NA	0	NA	NA	Microdilution	NA	>64	8	0.5	<=0.03	<=4	<=0.015	<=2	<=1	1	0.5	>1024	<=8	>64	<=0.25	4	8	0.06	0.12	<=0.03	4	0.5	<=0.015	16	1	blaCTX-M-1	NA	NA	NA	NA
17-AB00523	2017	BfR	Germany	Germany	Livestock	Pigs	Faeces/manure	NA	0	NA	NA	Microdilution	NA	64	8	1	<=0.03	<=4	<=0.015	<=2	<=1	<=0.5	>32	>1024	<=8	4	<=0.25	4	4	0.06	0.12	<=0.03	8	<=0.12	<=0.015	32	1	blaCTX-M-1	NA	NA	NA	NA
17-AB00524	2017	BfR	Germany	Germany	Livestock	Cattle	Faeces/manure	NA	0	NA	NA	Microdilution	NA	>64	8	2	<=0.03	8	0.03	>64	<=1	1	>32	>1024	<=8	8	<=0.25	8	8	0.12	0.25	<=0.03	8	0.25	<=0.015	32	2	blaCTX-M-1	NA	NA	NA	NA
17-AB00525	2017	BfR	Germany	Germany	Livestock	Cattle	Faeces/manure	NA	0	NA	NA	Microdilution	NA	>64	8	2	<=0.03	<=4	0.03	>64	<=1	2	>32	>1024	<=8	8	<=0.25	16	8	0.06	0.25	<=0.03	8	0.25	<=0.015	32	2	blaCTX-M-1	NA	NA	NA	NA
17-AB00526	2017	BfR	Germany	Germany	Livestock	Cattle	Faeces/manure	NA	0	NA	NA	Microdilution	NA	>64	8	2	<=0.03	<=4	<=0.015	64	<=1	<=0.5	>32	>1024	<=8	8	<=0.25	16	8	0.12	0.5	<=0.03	8	0.25	<=0.015	32	4	blaCTX-M-1	NA	NA	NA	NA
17-AB00527	2017	BfR	Germany	Germany	Livestock	Cattle	Faeces/manure	NA	0	NA	NA	Microdilution	NA	>64	8	1	<=0.03	>128	>8	<=2	<=1	1	<=0.25	<=8	<=8	4	<=0.25	8	32	0.06	0.12	<=0.03	4	0.25	0.06	64	2	blaCTX-M-1	NA	NA	NA	NA
17-AB00528	2017	BfR	Germany	Germany	Livestock	Pigs	Faeces/manure	NA	0	NA	NA	Microdilution	NA	>64	8	16	<=0.03	>128	>8	>64	<=1	>32	1	>1024	>128	16	1	32	64	0.25	0.5	<=0.03	32	0.25	0.06	128	32	blaCTX-M-15	NA	NA	NA	NA
17-AB00529	2017	BfR	Germany	Germany	Livestock	Pigs	Faeces/manure	NA	0	NA	NA	Microdilution	NA	>64	8	1	<=0.03	<=4	<=0.015	>64	4	<=0.5	<=0.25	<=8	<=8	4	<=0.25	4	8	0.06	0.12	<=0.03	4	0.25	<=0.015	16	1	blaCTX-M-1	NA	NA	NA	NA
17-AB00532	2017	BfR	Germany	Germany	Livestock	Pigs	Meat	NA	0	NA	NA	Microdilution	NA	>64	8	1	<=0.03	<=4	<=0.015	<=2	<=1	<=0.5	>32	>1024	<=8	8	<=0.25	8	16	0.06	0.25	<=0.03	8	0.25	<=0.015	32	1	blaCTX-M-1	NA	NA	NA	NA
17-AB00558	2017	BfR	Germany	Germany	Livestock	Pigs	Faeces/manure	NA	0	NA	NA	Microdilution	NA	>32	8	2	<=0.03	<=4	<=0.015	<=2	<=1	<=0.5	>32	>1024	<=8	8	<=0.25	4	32	0.06	0.12	<=0.03	4	0.25	<=0.015	32	2	blaCTX-M-1	NA	NA	NA	NA
17-AB00587	2017	BfR	Germany	Germany	Livestock	Livestock_unknown	Unknown	Raw meat	0	NA	NA	Microdilution	NA	>64	8	1	<=0.03	<=4	0.5	<=2	<=1	<=0.5	<=0.25	<=8	<=8	8	<=0.25	4	16	0.06	0.12	<=0.03	16	<=0.12	<=0.015	16	1	blaCTX-M-1	NA	NA	NA	NA
17-AB00612	2017	BfR	Germany	Germany	Livestock	Pigs	Faeces/manure	Raw meat	0	NA	NA	Microdilution	NA	>64	8	1	<=0.03	<=4	<=0.015	4	<=1	<=0.5	<=0.25	>1024	<=8	8	<=0.25	4	32	0.06	0.12	<=0.03	4	<=0.12	<=0.015	32	1	blaCTX-M-1	NA	NA	NA	NA
17-AB00614	2017	BfR	Germany	Germany	Livestock	Pigs	Faeces/manure	Raw meat	0	NA	NA	Microdilution	NA	>64	8	16	<=0.03	>128	>8	>64	<=1	<=0.5	<=0.25	>1024	128	8	<=0.25	4	16	0.06	0.12	<=0.03	8	<=0.12	0.03	64	16	blaCTX-M-15	NA	NA	NA	NA
17-AB00615	2017	BfR	Germany	Germany	Livestock	Pigs	Faeces/manure	Raw sausage	0	NA	NA	Microdilution	NA	>64	8	4	<=0.03	>128	>8	4	<=1	<=0.5	>32	>1024	<=8	8	<=0.25	16	32	0.06	0.5	<=0.03	16	<=0.12	0.03	64	4	blaCTX-M-1	NA	NA	NA	NA
17-AB00616	2017	BfR	Germany	Germany	Livestock	Pigs	Faeces/manure	NA	0	NA	NA	Microdilution	NA	>64	8	1	<=0.03	<=4	<=0.015	64	<=1	<=0.5	>32	>1024	<=8	>64	<=0.25	4	32	0.06	0.12	<=0.03	4	0.25	<=0.015	64	1	blaCTX-M-14	NA	NA	NA	NA
17-AB00617	2017	BfR	Germany	Germany	Livestock	Pigs	Faeces/manure	NA	0	NA	NA	Microdilution	NA	>64	8	2	<=0.03	>128	8	>64	<=1	<=0.5	<=0.25	>1024	<=8	8	<=0.25	8	8	0.12	0.25	<=0.03	8	0.25	<=0.015	32	2	blaCTX-M-1	NA	NA	NA	NA
17-AB00618	2017	BfR	Germany	Germany	Livestock	Pigs	Faeces/manure	NA	0	NA	NA	Microdilution	NA	>64	8	2	<=0.03	<=4	<=0.015	64	<=1	1	<=0.25	<=8	<=8	8	<=0.25	4	16	0.06	0.12	<=0.03	4	0.25	<=0.015	64	1	blaCTX-M-1	NA	NA	NA	NA
17-AB00626	2017	BfR	Germany	Germany	Livestock	Cattle	Faeces/manure	NA	0	NA	NA	Microdilution	NA	>64	8	0.5	<=0.03	<=4	<=0.015	>64	<=1	<=0.5	<=0.25	<=8	64	8	<=0.25	4	16	0.06	0.12	<=0.03	4	<=0.12	<=0.015	32	0.5	blaCTX-M-14	NA	NA	NA	NA
17-AB00627	2017	BfR	Germany	Germany	Livestock	Cattle	Faeces/manure	NA	0	NA	NA	Microdilution	NA	>64	8	0.5	<=0.03	<=4	<=0.015	>64	<=1	<=0.5	<=0.25	<=8	128	8	<=0.25	4	8	0.06	0.12	<=0.03	4	<=0.12	<=0.015	32	1	blaCTX-M-14	NA	NA	NA	NA
17-AB00628	2017	BfR	Germany	Germany	Livestock	Cattle	Faeces/manure	NA	0	NA	NA	Microdilution	NA	>64	8	0.5	<=0.03	<=4	<=0.015	<=2	<=1	1	<=0.25	<=8	128	8	<=0.25	4	16	0.06	0.12	<=0.03	4	0.25	<=0.015	64	1	blaCTX-M-14	NA	NA	NA	NA
17-AB00629	2017	BfR	Germany	Germany	Livestock	Cattle	Faeces/manure	NA	0	NA	NA	Microdilution	NA	>64	8	0.5	<=0.03	<=4	<=0.015	<=2	<=1	<=0.5	<=0.25	<=8	128	8	<=0.25	4	16	0.06	0.12	<=0.03	4	0.25	<=0.015	32	0.5	blaCTX-M-14	NA	NA	NA	NA
17-AB00630	2017	BfR	Germany	Germany	Livestock	Cattle	Faeces/manure	NA	0	NA	NA	Microdilution	NA	>64	8	4	<=0.03	>128	0.5	64	<=1	1	<=0.25	>1024	<=8	8	0.5	8	64	0.12	0.25	<=0.03	8	0.25	0.03	128	4	blaCTX-M-1	NA	NA	NA	NA
17-AB00631	2017	BfR	Germany	Germany	Livestock	Pigs	Faeces/manure	NA	0	NA	NA	Microdilution	NA	>64	8	4	<=0.03	>128	0.5	64	<=1	2	<=0.25	>1024	<=8	8	<=0.25	8	64	0.12	0.25	<=0.03	32	0.5	0.03	128	4	blaCTX-M-1	NA	NA	NA	NA
17-AB00632	2017	BfR	Germany	Germany	Livestock	Pigs	Faeces/manure	NA	0	NA	NA	Microdilution	NA	>64	8	16	<=0.03	>128	>8	>64	<=1	>32	>32	>1024	>128	>64	<=0.25	8	16	0.06	0.25	<=0.03	16	<=0.12	0.03	128	16	blaCTX-M-15	NA	NA	NA	NA
17-AB00633	2017	BfR	Germany	Germany	Livestock	Cattle	Faeces/manure	NA	0	NA	NA	Microdilution	NA	>64	8	4	<=0.03	>128	>8	>64	<=1	16	>32	>1024	>128	16	<=0.25	32	64	0.12	0.5	<=0.03	16	<=0.12	0.06	128	8	blaCTX-M-14	NA	NA	NA	NA
17-AB00634	2017	BfR	Germany	Germany	Livestock	Cattle	Faeces/manure	NA	0	NA	NA	Microdilution	NA	>64	8	16	<=0.03	32	2	>64	<=1	<=0.5	>32	>1024	32	32	1	16	64	0.12	0.5	<=0.03	32	0.25	0.06	128	16	blaCTX-M-15	NA	NA	NA	NA
17-AB00635	2017	BfR	Germany	Germany	Livestock	Pigs	Faeces/manure	NA	0	NA	NA	Microdilution	NA	>64	8	4	<=0.03	<=4	<=0.015	4	<=1	<=0.5	>32	>1024	<=8	8	<=0.25	4	64	0.06	0.12	<=0.03	4	0.25	<=0.015	64	4	blaCTX-M-32	NA	NA	NA	NA
17-AB00636	2017	BfR	Germany	Germany	Livestock	Cattle	Faeces/manure	NA	0	NA	NA	Microdilution	NA	>64	8	1	<=0.03	<=4	<=0.015	>64	<=1	<=0.5	>32	>1024	16	8	<=0.25	4	16	0.06	0.12	<=0.03	4	0.25	<=0.015	32	1	blaCTX-M-1	NA	NA	NA	NA
17-AB00637	2017	BfR	Germany	Germany	Livestock	Cattle	Faeces/manure	NA	0	NA	NA	Microdilution	NA	>64	8	1	<=0.03	<=4	<=0.015	>64	<=1	<=0.5	>32	>1024	16	8	<=0.25	4	16	0.06	0.12	<=0.03	8	0.25	<=0.015	32	1	blaCTX-M-1	NA	NA	NA	NA
17-AB00638	2017	BfR	Germany	Germany	Livestock	Cattle	Faeces/manure	NA	0	NA	NA	Microdilution	NA	>64	8	1	<=0.03	<=4	<=0.015	64	<=1	<=0.5	>32	>1024	16	8	0.5	4	16	0.06	0.12	<=0.03	4	0.25	<=0.015	32	1	blaCTX-M-1	NA	NA	NA	NA
17-AB00639	2017	BfR	Germany	Germany	Livestock	Pigs	Faeces/manure	NA	0	NA	NA	Microdilution	NA	>64	8	4	<=0.03	8	0.5	<=2	<=1	32	>32	>1024	<=8	8	<=0.25	4	32	0.06	0.12	<=0.03	4	<=0.12	<=0.015	32	1	blaCTX-M-1	NA	NA	NA	NA
17-AB00640	2017	BfR	Germany	Germany	Livestock	Pigs	Faeces/manure	NA	0	NA	NA	Microdilution	NA	>64	8	1	<=0.03	<=4	<=0.015	<=2	<=1	<=0.5	>32	>1024	16	>64	<=0.25	2	8	0.06	0.12	<=0.03	4	<=0.12	<=0.015	16	1	blaCTX-M-1	NA	NA	NA	NA
17-AB00675	2017	BfR	Germany	Germany	Livestock	Pigs	Faeces/manure	NA	0	NA	NA	Microdilution	NA	>64	8	2	<=0.03	8	0.5	64	<=1	<=0.5	<=0.25	<=8	<=8	8	1	4	32	0.06	0.25	<=0.03	8	0.5	<=0.015	64	4	blaCTX-M-1	NA	NA	NA	NA
17-AB00691	2017	BfR	Germany	Germany	Livestock	Pigs	Faeces/manure	NA	0	NA	NA	Microdilution	NA	>64	8	4	<=0.03	8	0.5	>64	<=1	<=0.5	>32	>1024	<=8	8	<=0.25	8	64	0.12	0.25	<=0.03	8	0.25	0.03	64	4	blaCTX-M-1	NA	NA	NA	NA
17-AB00708	2017	BfR	Germany	Germany	Livestock	Pigs	Faeces/manure	NA	0	NA	NA	Microdilution	NA	>64	8	0.5	<=0.03	<=4	<=0.015	<=2	<=1	<=0.5	<=0.25	>1024	<=8	32	<=0.25	4	2	0.06	0.12	<=0.03	4	<=0.12	<=0.015	8	0.5	blaCTX-M-1	NA	NA	NA	NA
17-AB00719	2017	BfR	Germany	Germany	Livestock	Pigs	Faeces/manure	NA	0	NA	NA	Microdilution	NA	>64	8	2	<=0.03	<=4	<=0.015	64	<=1	<=0.5	>32	>1024	<=8	4	<=0.25	8	4	0.06	0.25	<=0.03	16	0.25	0.06	32	2	blaCTX-M-1	NA	NA	NA	NA
17-AB00725	2017	BfR	Germany	Germany	Livestock	Pigs	Faeces/manure	NA	0	NA	NA	Microdilution	NA	>64	8	4	<=0.03	<=4	<=0.015	64	<=1	<=0.5	>32	>1024	128	8	<=0.25	4	64	0.06	0.12	0.06	4	0.25	0.03	128	2	blaCTX-M-1	NA	NA	NA	NA
17-AB00745	2017	BfR	Germany	Germany	Livestock	Pigs	Meat	NA	0	NA	NA	Microdilution	NA	>64	8	2	<=0.03	<=4	<=0.015	64	<=1	<=0.5	>32	>1024	<=8	4	<=0.25	8	4	0.06	0.25	<=0.03	8	0.25	<=0.015	32	1	blaCTX-M-1	NA	NA	NA	NA
17-AB00763	2017	BfR	Germany	Germany	Livestock	Pigs	Faeces/manure	NA	0	NA	NA	Microdilution	NA	>64	8	2	<=0.03	>128	0.25	<=2	<=1	<=0.5	<=0.25	>1024	<=8	8	<=0.25	4	8	0.06	0.25	<=0.03	8	<=0.12	<=0.015	32	2	blaCTX-M-1	NA	NA	NA	NA
17-AB00765	2017	BfR	Germany	Germany	Livestock	Pigs	Faeces/manure	NA	0	NA	NA	Microdilution	NA	>64	8	2	<=0.03	16	0.5	>64	<=1	<=0.5	<=0.25	<=8	<=8	8	0.5	4	8	0.12	0.25	<=0.03	8	<=0.12	<=0.015	64	2	blaCTX-M-1	NA	NA	NA	NA
17-AB00766	2017	BfR	Germany	Germany	Livestock	Pigs	Faeces/manure	NA	0	NA	NA	Microdilution	NA	>64	8	16	<=0.03	>128	>8	>64	<=1	<=0.5	<=0.25	>1024	16	8	<=0.25	8	64	0.12	0.25	<=0.03	8	0.25	0.03	128	16	blaCTX-M-15	NA	NA	NA	NA
17-AB00767	2017	BfR	Germany	Germany	Livestock	Pigs	Faeces/manure	NA	0	NA	NA	Microdilution	NA	>64	8	1	<=0.03	<=4	<=0.015	<=2	<=1	<=0.5	<=0.25	<=8	<=8	8	<=0.25	4	16	0.06	0.25	<=0.03	8	0.25	<=0.015	32	1	blaCTX-M-1	NA	NA	NA	NA
17-AB00768	2017	BfR	Germany	Germany	Livestock	Pigs	Faeces/manure	NA	0	NA	NA	Microdilution	NA	>64	8	2	<=0.03	<=4	0.03	>64	4	1	>32	>1024	<=8	8	0.5	8	64	0.12	0.25	<=0.03	8	0.25	<=0.015	128	2	blaCTX-M-1	NA	NA	NA	NA
17-AB00776	2017	BfR	Germany	Germany	Livestock	Cattle	Faeces/manure	NA	0	NA	NA	Microdilution	NA	>64	8	4	<=0.03	>128	>8	>64	<=1	>32	>32	>1024	<=8	8	<=0.25	8	32	0.12	0.25	<=0.03	8	0.25	0.03	128	8	blaCTX-M-2	NA	NA	NA	NA
17-AB00778	2017	BfR	Germany	Germany	Livestock	Cattle	Meat	NA	0	NA	NA	Microdilution	NA	>64	8	1	<=0.03	<=4	<=0.015	<=2	<=1	<=0.5	>32	>1024	<=8	<=2	<=0.25	4	16	0.06	0.12	<=0.03	4	<=0.12	<=0.015	32	1	blaCTX-M-1	NA	NA	NA	NA
17-AB00782	2017	BfR	Germany	Germany	Livestock	Cattle	Faeces/manure	NA	0	NA	NA	Microdilution	NA	>64	8	4	<=0.03	>128	>8	>64	<=1	2	>32	>1024	>128	16	<=0.25	16	32	0.25	0.25	<=0.03	8	0.25	0.06	128	4	blaCTX-M-55	NA	NA	NA	NA
17-AB00792	2017	BfR	Germany	Germany	Livestock	Livestock_unknown	Unknown	Raw meat	0	NA	NA	Microdilution	NA	>64	8	8	<=0.03	>128	0.25	64	<=1	1	>32	<=8	<=8	8	0.5	4	64	0.06	0.25	<=0.03	8	0.25	<=0.015	64	8	blaCTX-M-55	NA	NA	NA	NA
17-AB00810	2017	BfR	Germany	Germany	Livestock	Pigs	Faeces/manure	NA	0	NA	NA	Microdilution	NA	>64	8	8	<=0.03	>128	>8	>64	<=1	>32	>32	>1024	128	16	0.5	16	32	0.12	0.25	<=0.03	8	0.25	<=0.015	64	8	blaCTX-M-1	NA	NA	NA	NA
17-AB00811	2017	BfR	Germany	Germany	Livestock	Pigs	Faeces/manure	NA	0	NA	NA	Microdilution	NA	>64	8	1	<=0.03	128	0.12	<=2	<=1	<=0.5	>32	>1024	<=8	4	<=0.25	4	4	0.06	0.12	<=0.03	8	0.5	<=0.015	16	1	blaCTX-M-1	NA	NA	NA	NA
17-AB00812	2017	BfR	Germany	Germany	Livestock	Pigs	Faeces/manure	NA	0	NA	NA	Microdilution	NA	>64	8	1	<=0.03	<=4	0.03	>64	<=1	<=0.5	>32	>1024	<=8	64	<=0.25	4	4	0.06	0.25	<=0.03	8	<=0.12	<=0.015	32	1	blaCTX-M-15	NA	NA	NA	NA
17-AB00880	2017	BfR	Germany	Germany	Livestock	Cattle	Faeces/manure	NA	0	NA	NA	Microdilution	NA	>64	8	8	<=0.03	>128	8	>64	<=1	<=0.5	<=0.25	>1024	<=8	4	<=0.25	4	32	0.06	0.12	<=0.03	8	<=0.12	<=0.015	128	8	blaCTX-M-15	NA	NA	NA	NA
17-AB00881	2017	BfR	Germany	Germany	Livestock	Pigs	Faeces/manure	NA	0	NA	NA	Microdilution	NA	>64	8	1	<=0.03	<=4	<=0.015	<=2	<=1	<=0.5	<=0.25	<=8	<=8	8	<=0.25	4	8	0.06	0.25	<=0.03	4	<=0.12	<=0.015	32	1	blaCTX-M-1	NA	NA	NA	NA
17-AB00882	2017	BfR	Germany	Germany	Livestock	Pigs	Faeces/manure	NA	0	NA	NA	Microdilution	NA	>64	8	2	<=0.03	<=4	<=0.015	>64	<=1	<=0.5	>32	>1024	<=8	8	<=0.25	8	8	0.06	0.25	<=0.03	8	0.25	<=0.015	32	8	blaCTX-M-1	NA	NA	NA	NA
17-AB00883	2017	BfR	Germany	Germany	Livestock	Pigs	Faeces/manure	NA	0	NA	NA	Microdilution	NA	>64	8	4	<=0.03	<=4	<=0.015	>64	<=1	1	>32	>1024	<=8	4	1	4	16	0.06	0.25	<=0.03	8	<=0.12	<=0.015	32	2	blaCTX-M-1	NA	NA	NA	NA
17-AB00884	2017	BfR	Germany	Germany	Wild_animals	Deer	Faeces/manure	NA	0	NA	NA	Microdilution	NA	>64	8	4	<=0.03	<=4	<=0.015	<=2	<=1	<=0.5	<=0.25	<=8	<=8	8	<=0.25	4	16	0.12	0.25	<=0.03	16	<=0.12	<=0.015	64	4	blaCTX-M-1	NA	NA	NA	NA
17-AB00900	2017	BfR	Germany	Germany	Livestock	Cattle	Faeces/manure	NA	0	NA	NA	Microdilution	NA	>64	8	16	<=0.03	<=4	<=0.015	<=2	<=1	1	>32	<=8	<=8	16	<=0.25	8	32	0.12	0.25	<=0.03	16	<=0.12	0.03	128	16	blaCTX-M-15	NA	NA	NA	NA
17-AB00901	2017	BfR	Germany	Germany	Livestock	Pigs	Faeces/manure	NA	0	NA	NA	Microdilution	NA	>64	8	16	<=0.03	>128	>8	>64	<=1	2	>32	>1024	<=8	16	<=0.25	16	64	0.06	0.25	<=0.03	8	0.25	<=0.015	128	8	blaCTX-M-1	NA	NA	NA	NA
17-AB00902	2017	BfR	Germany	Germany	Livestock	Pigs	Faeces/manure	NA	0	NA	NA	Microdilution	NA	>64	8	1	<=0.03	<=4	<=0.015	>64	<=1	1	>32	>1024	<=8	4	<=0.25	8	4	0.06	0.25	<=0.03	8	<=0.12	<=0.015	16	1	blaCTX-M-15	NA	NA	NA	NA
17-AB00903	2017	BfR	Germany	Germany	Livestock	Cattle	Faeces/manure	NA	0	NA	NA	Microdilution	NA	>64	8	16	<=0.03	>128	2	64	<=1	<=0.5	>32	>1024	<=8	8	<=0.25	4	32	0.06	0.25	<=0.03	8	<=0.12	0.03	64	8	blaCTX-M-15	NA	NA	NA	NA
17-AB00904	2017	BfR	Germany	Germany	Livestock	Cattle	Faeces/manure	NA	0	NA	NA	Microdilution	NA	>64	8	2	<=0.03	<=4	<=0.015	>64	<=1	>32	<=0.25	<=8	>128	8	<=0.25	4	64	0.12	0.25	<=0.03	4	0.25	0.03	128	2	blaCTX-M-1	NA	NA	NA	NA
17-AB00905	2017	BfR	Germany	Germany	Livestock	Cattle	Faeces/manure	NA	0	NA	NA	Microdilution	NA	>64	8	1	<=0.03	<=4	<=0.015	>64	<=1	1	>32	>1024	128	16	<=0.25	8	8	0.06	0.25	<=0.03	4	0.25	<=0.015	32	2	blaCTX-M-1	NA	NA	NA	NA
17-AB00906	2017	BfR	Germany	Germany	Livestock	Cattle	Faeces/manure	NA	0	NA	NA	Microdilution	NA	>64	8	1	<=0.03	<=4	<=0.015	>64	<=1	2	>32	>1024	64	16	<=0.25	8	4	0.06	0.25	<=0.03	8	0.25	<=0.015	32	2	blaCTX-M-1	NA	NA	NA	NA
17-AB00907	2017	BfR	Germany	Germany	Livestock	Pigs	Faeces/manure	NA	0	NA	NA	Microdilution	NA	>64	8	2	<=0.03	>128	>8	>64	<=1	2	>32	>1024	>128	>64	<=0.25	8	16	0.06	0.25	<=0.03	8	<=0.12	<=0.015	64	1	blaCTX-M-14	NA	NA	NA	NA
17-AB00908	2017	BfR	Germany	Germany	Livestock	Pigs	Faeces/manure	NA	0	NA	NA	Microdilution	NA	>64	8	2	<=0.03	64	0.12	<=2	<=1	<=0.5	>32	>1024	<=8	4	<=0.25	2	16	0.12	0.12	<=0.03	8	0.25	<=0.015	64	2	blaCTX-M-1	NA	NA	NA	NA
17-AB00909	2017	BfR	Germany	Germany	Livestock	Cattle	Faeces/manure	NA	0	NA	NA	Microdilution	NA	>64	8	4	<=0.03	16	0.5	<=2	<=1	<=0.5	<=0.25	<=8	<=8	4	<=0.25	4	64	0.06	0.25	0.06	8	0.25	0.03	64	8	blaCTX-M-1, blaCTX-M-14	NA	NA	NA	NA
17-AB00935	2017	BfR	Germany	Germany	Wild_animals	Deer	Faeces/manure	NA	0	NA	NA	Microdilution	NA	>64	8	1	<=0.03	<=4	0.03	<=2	<=1	1	<=0.25	<=8	<=8	8	<=0.25	4	64	0.06	0.12	<=0.03	16	0.25	<=0.015	64	1	blaCTX-M-14	NA	NA	NA	NA
17-AB00936	2017	BfR	Germany	Germany	Wild_animals	Deer	Faeces/manure	NA	0	NA	NA	Microdilution	NA	>64	8	1	<=0.03	<=4	0.03	<=2	<=1	<=0.5	<=0.25	<=8	<=8	4	<=0.25	2	32	0.06	0.12	<=0.03	4	0.25	<=0.015	64	0.5	blaCTX-M-14	NA	NA	NA	NA
17-AB00938	2017	BfR	Germany	Germany	Livestock	Pigs	Faeces/manure	NA	0	NA	NA	Microdilution	NA	>64	8	16	<=0.03	128	0.25	>64	2	1	>32	>1024	>128	16	<=0.25	64	0.25	8	16	<=0.03	32	0.25	0.06	8	16	NA	NA	NA	NA	NA
17-AB00939	2017	BfR	Germany	Germany	Livestock	Cattle	Faeces/manure	NA	0	NA	NA	Microdilution	NA	>64	8	1	<=0.03	<=4	<=0.015	>64	<=1	<=0.5	>32	>1024	16	8	<=0.25	4	8	0.06	0.12	<=0.03	4	0.25	<=0.015	32	1	blaCTX-M-1	NA	NA	NA	NA
17-AB00955	2017	BfR	Germany	Germany	Livestock	Pigs	Meat	NA	0	NA	NA	Microdilution	NA	>64	8	4	<=0.03	>128	>8	>64	<=1	1	>32	>1024	<=8	8	<=0.25	4	8	0.06	0.12	<=0.03	8	0.25	<=0.015	64	8	blaCTX-M-27	NA	NA	NA	NA
17-AB01002	2017	BfR	Germany	Germany	Livestock	Cattle	Faeces/manure	NA	0	NA	NA	Microdilution	NA	>64	8	4	<=0.03	128	0.25	64	<=1	<=0.5	<=0.25	<=8	<=8	16	<=0.25	4	64	0.12	0.25	<=0.03	8	0.25	0.03	128	4	blaCTX-M-1	NA	NA	NA	NA
17-AB01004	2017	BfR	Germany	Germany	Livestock	Pigs	Faeces/manure	NA	0	NA	NA	Microdilution	NA	>64	8	16	<=0.03	<=4	0.06	>64	<=1	2	<=0.25	<=8	16	8	0.5	16	64	0.12	0.5	0.06	32	1	0.12	128	16	blaCTX-M-15	NA	NA	NA	NA
17-AB01005	2017	BfR	Germany	Germany	Livestock	Pigs	Faeces/manure	NA	0	NA	NA	Microdilution	NA	>64	4	8	<=0.03	16	0.25	>64	<=1	<=0.5	<=0.25	<=8	<=8	8	<=0.25	4	0.5	0.06	0.12	<=0.03	8	<=0.12	<=0.015	4	8	NA	NA	blaSHV-12	NA	NA
17-AB01006	2017	BfR	Germany	Germany	Livestock	Pigs	Faeces/manure	NA	0	NA	NA	Microdilution	NA	>64	8	16	<=0.03	16	0.5	<=2	<=1	1	<=0.25	<=8	<=8	8	<=0.25	8	1	0.06	0.12	<=0.03	8	<=0.12	<=0.015	8	64	NA	NA	blaSHV-12	NA	NA
17-AB01014	2017	BfR	Germany	Germany	Livestock	Pigs	Faeces/manure	NA	0	NA	NA	Microdilution	NA	>64	8	8	<=0.03	>128	>8	>64	<=1	<=0.5	>32	>1024	<=8	>64	0.5	8	8	0.06	0.25	<=0.03	16	0.25	0.03	64	16	blaCTX-M-15	NA	NA	NA	NA
17-AB01016	2017	BfR	Germany	Germany	Livestock	Pigs	Faeces/manure	NA	0	NA	NA	Microdilution	NA	>64	8	16	<=0.03	>128	>8	>64	<=1	<=0.5	<=0.25	<=8	<=8	8	0.5	8	64	0.12	0.5	<=0.03	16	0.25	0.03	128	16	blaCTX-M-15	NA	NA	NA	NA
17-AB01018	2017	BfR	Germany	Germany	Livestock	Pigs	Faeces/manure	NA	0	NA	NA	Microdilution	NA	>64	8	16	<=0.03	8	0.5	>64	<=1	1	>32	>1024	128	8	0.5	8	0.5	0.06	0.25	<=0.03	16	0.25	<=0.015	4	16	NA	NA	blaSHV-12	NA	NA
[truncated: 9,037 more rows]
